# Supplementary material for: Logic-Based Modeling and Drug Repurposing for the Prediction of Novel Therapeutic Targets and Combination Regimens against E2F1-Driven Melanoma Progression
Source: Preprints.org preprint supplement (doi:10.20944/preprints202108.0327.v3), 2023-06-12
Supplement: Supplementary file 1 [file supplementary]

## Sheet: 3a
Additional file 3a: Prediction of ADMET risk, pharmacokinetics, drug-likeness, and medicinal friendliness score of FDA-approved candidate drugs that are docked to protein signatures AKT1 and MDM2.
ZINC ID	Canonical SMILES	Formula	Physicochemical properties									Lipophilicity						Water solubility												Pharmacokinetics									Drug-likeness						Medicinal Chemistry
			MW	#Heavy atoms	#Aromatic heavy atoms	Fraction Csp3	#Rotatable bonds	#H-bond acceptors	#H-bond donors	MR	TPSA	iLOGP	XLOGP3	WLOGP	MLOGP	Silicos-IT Log P	Consensus Log P	ESOL Log S	ESOL Solubility (mg/ml)	ESOL Solubility (mol/l)	ESOL Class	Ali Log S	Ali Solubility (mg/ml)	Ali Solubility (mol/l)	Ali Class	Silicos-IT LogSw	Silicos-IT Solubility (mg/ml)	Silicos-IT Solubility (mol/l)	Silicos-IT class	GI absorption	BBB permeant	Pgp substrate	CYP1A2 inhibitor	CYP2C19 inhibitor	CYP2C9 inhibitor	CYP2D6 inhibitor	CYP3A4 inhibitor	log Kp (cm/s)	Lipinski #violations	Ghose #violations	Veber #violations	Egan #violations	Muegge #violations	Bioavailability Score	PAINS #alerts	Brenk #alerts	Leadlikeness #violations	Synthetic Accessibility
ZINC61	NC[C@@H](c1ccc(cc1)Cl)CC(=O)O	C10H12ClNO2	213.66	14	6	0.3	4	3	2	55.32	63.32	1.66	-0.96	1.86	1.96	1.87	1.28	-0.61	52.1	0.244	Very soluble	0.12	279	1.3	Highly soluble	-2.89	0.273	0.00128	Soluble	High	Yes	No	No	No	No	No	No	-8.28	0	0	0	0	0	0.55	0	0	1	1.81
ZINC83	C[C@@H](C[N+](C)(C)C)OC(=O)N	C7H17N2O2+	161.22	11	0	0.86	4	2	1	42.52	52.32	-2.12	0.03	0.18	-3.38	-3.31	-1.72	-0.59	41	0.254	Very soluble	-0.68	33.6	0.208	Very soluble	-1.26	8.92	0.0553	Soluble	High	No	No	No	No	No	No	No	-7.26	0	0	0	0	1	0.55	0	1	1	2.24
ZINC96	CN(CC[C@H](c1ccccn1)c1ccc(cc1)Br)C	C16H19BrN2	319.24	19	12	0.31	5	2	0	83.51	16.13	3.37	3.45	3.93	3.16	4.04	3.59	-4.13	0.0237	7.41e-05	Moderately soluble	-3.47	0.108	0.000339	Soluble	-6.34	0.000145	4.55e-07	Poorly soluble	High	Yes	No	Yes	No	No	Yes	No	-5.8	0	0	0	0	0	0.55	0	0	0	2.77
ZINC122	CN(CCO[C@H](c1ccccn1)c1ccc(cc1)Cl)C	C16H19ClN2O	290.79	20	12	0.31	6	3	0	81.91	25.36	3.45	2.9	3.08	2.16	3.54	3.02	-3.52	0.0882	0.000303	Soluble	-3.09	0.235	0.000807	Soluble	-5.86	0.000401	1.38e-06	Moderately soluble	High	Yes	No	No	Yes	No	Yes	No	-6.01	0	0	0	0	0	0.55	0	0	0	2.98
ZINC196	CN(CCOC(=O)[C@@H](C1(O)CCCC1)c1ccccc1)C	C17H25NO3	291.39	21	6	0.59	7	4	1	82.74	49.77	3.3	2.74	2.18	2.02	2.73	2.59	-3.12	0.22	0.000755	Soluble	-3.44	0.106	0.000363	Soluble	-3.85	0.0412	0.000141	Soluble	High	Yes	No	No	No	No	Yes	No	-6.13	0	0	0	0	0	0.55	0	0	0	3.19
ZINC242	CN(CCO[C@](c1ccccn1)(c1ccccc1)C)C	C17H22N2O	270.37	20	12	0.35	6	3	0	81.59	25.36	3.05	2.46	2.81	1.89	3.12	2.67	-3.11	0.208	0.000769	Soluble	-2.64	0.624	0.00231	Soluble	-5.64	0.000621	2.3e-06	Moderately soluble	High	Yes	No	No	No	No	Yes	No	-6.2	0	0	0	0	0	0.55	0	0	0	3.04
ZINC257	COC(=O)CCc1ccc(cc1)OC[C@@H](CNC(C)C)O	C16H25NO4	295.37	21	6	0.56	10	5	2	81.6	67.79	3.63	1.85	1.53	1.61	2.72	2.27	-2.39	1.21	0.00409	Soluble	-2.89	0.377	0.00127	Soluble	-4.17	0.0198	6.71e-05	Moderately soluble	High	Yes	No	No	No	No	Yes	No	-6.79	0	0	0	0	0	0.55	0	0	1	2.68
ZINC301	OC(=O)[C@H](c1cccc(c1)Oc1ccccc1)C	C15H14O3	242.27	18	12	0.13	4	3	1	69.31	46.53	2.31	3.31	3.67	3.06	2.99	3.07	-3.66	0.0534	0.00022	Soluble	-3.96	0.0264	0.000109	Soluble	-4.47	0.00821	3.39e-05	Moderately soluble	High	Yes	No	No	No	No	No	No	-5.43	0	0	0	0	0	0.85	0	0	1	2.41
ZINC347	CN1[C@@H]2CCC[C@H]1CC(C2)NC(=O)c1nn(c2c1cccc2)C	C18H24N4O	312.41	23	9	0.56	3	3	1	95.03	50.16	2.85	2.75	1.94	2.2	1.45	2.24	-3.6	0.0783	0.000251	Soluble	-3.46	0.109	0.000348	Soluble	-3.71	0.0615	0.000197	Soluble	High	Yes	Yes	No	No	No	Yes	No	-6.25	0	0	0	0	0	0.55	0	0	0	4.08
ZINC416	C[C@H](CCc1ccccc1)NC[C@H](c1ccc(c(c1)C(=O)N)O)O	C19H24N2O3	328.41	24	12	0.32	8	4	4	94.01	95.58	2.68	3.09	1.81	1.93	2.72	2.45	-3.66	0.0711	0.000216	Soluble	-4.76	0.00564	1.72e-05	Moderately soluble	-5.08	0.00274	8.34e-06	Moderately soluble	High	No	Yes	No	No	No	Yes	Yes	-6.11	0	0	0	0	0	0.55	0	0	1	3
ZINC431	Clc1ccc2c(c1)C(=N[C@H](C(=O)N2)O)c1ccccc1Cl	C15H10Cl2N2O2	321.16	21	12	0.07	1	3	2	89.22	61.69	2.14	2.39	2.15	2.9	3.92	2.7	-3.69	0.065	0.000202	Soluble	-3.33	0.151	0.000471	Soluble	-6.12	0.000242	7.53e-07	Poorly soluble	High	Yes	No	No	No	No	No	No	-6.56	0	0	0	0	0	0.55	0	0	0	3.49
ZINC449	O=C(C(c1ccccc1)(c1ccccc1)O)O[C@H]1CCC[N+](C1)(C)C	C21H26NO3+	340.44	25	12	0.38	5	3	1	102.43	46.53	-0.14	3.25	2.22	-0.99	0.54	0.97	-4.02	0.0323	9.48e-05	Moderately soluble	-3.9	0.0428	0.000126	Soluble	-6.03	0.000317	9.31e-07	Poorly soluble	High	Yes	Yes	No	No	No	Yes	No	-6.07	0	0	0	0	0	0.55	0	1	0	3.36
ZINC469	O[C@@H](c1cc(O)cc(c1)O)CNC(C)C	C11H17NO3	211.26	15	6	0.45	4	4	4	58.65	72.72	1.66	0.72	0.8	0.66	1	0.97	-1.64	4.89	0.0232	Very soluble	-1.83	3.16	0.0149	Very soluble	-2.01	2.08	0.00984	Soluble	High	No	No	No	No	No	No	No	-7.08	0	0	0	0	0	0.55	0	0	1	2.03
ZINC507	COc1ccc(cc1[C@@H](CNC(=O)CN)O)OC	C12H18N2O4	254.28	18	6	0.42	7	5	3	65.68	93.81	1.19	-0.58	-0.51	-0.39	0.6	0.06	-0.84	37.1	0.146	Very soluble	-0.92	30.6	0.12	Very soluble	-2.58	0.666	0.00262	Soluble	High	No	No	No	No	No	No	No	-8.26	0	1	0	0	0	0.55	0	0	0	2.49
ZINC565	CN(CCO[C@@H](c1ccccc1C)c1ccccc1)C	C18H23NO	269.38	20	12	0.33	6	2	0	84.07	12.47	3.52	3.77	3.34	3.4	3.97	3.6	-3.93	0.0314	0.000117	Soluble	-3.73	0.0507	0.000188	Soluble	-6.01	0.000263	9.75e-07	Poorly soluble	High	Yes	No	Yes	No	No	Yes	No	-5.27	0	0	0	0	0	0.55	0	0	1	2.91
ZINC596	CC(=CCN1CC[C@@]2([C@H]([C@H]1Cc1c2cc(cc1)O)C)C)C	C19H27NO	285.42	21	6	0.58	2	2	1	93.27	23.47	3.32	3.31	3.5	3.68	3.83	3.53	-3.77	0.048	0.000168	Soluble	-3.48	0.0948	0.000332	Soluble	-4.38	0.0118	4.12e-05	Moderately soluble	High	Yes	No	No	No	No	Yes	No	-5.69	0	0	0	0	0	0.55	0	1	0	3.99
ZINC740	Clc1ccc2c(c1)C(=N[C@H](C(=O)N2C)O)c1ccccc1	C16H13ClN2O2	300.74	21	12	0.12	1	3	1	89.11	52.9	2.13	2.19	1.71	2.64	3.21	2.38	-3.44	0.109	0.000362	Soluble	-2.93	0.35	0.00116	Soluble	-5.19	0.00195	6.47e-06	Moderately soluble	High	Yes	No	No	No	No	No	No	-6.58	0	0	0	0	0	0.55	0	0	0	3.51
ZINC746	O[C@H](c1cc(O)cc(c1)O)CNC(C)(C)C	C12H19NO3	225.28	16	6	0.5	4	4	4	63.49	72.72	2.05	0.9	1.19	0.94	1.23	1.26	-1.82	3.43	0.0152	Very soluble	-2.01	2.19	0.00972	Soluble	-2.4	0.907	0.00403	Soluble	High	No	No	No	No	No	No	No	-7.04	0	0	0	0	0	0.55	0	0	1	2.13
ZINC850	ON([C@H](c1cc2c(s1)cccc2)C)C(=O)N	C11H12N2O2S	236.29	16	9	0.18	3	2	2	63.33	94.8	1.76	1.61	2.41	1.77	1.42	1.79	-2.54	0.685	0.0029	Soluble	-3.21	0.145	0.000613	Soluble	-2.14	1.73	0.00731	Soluble	High	No	No	No	No	No	No	No	-6.6	0	0	0	0	0	0.55	0	2	1	2.78
ZINC856	O=CNc1cc(ccc1O)[C@@H](CN[C@H](Cc1ccc(cc1)OC)C)O	C19H24N2O4	344.4	25	12	0.32	9	5	4	97.5	90.82	2.85	1.84	1.71	1.79	2.63	2.16	-2.9	0.438	0.00127	Soluble	-3.37	0.148	0.000429	Soluble	-5.2	0.00216	6.28e-06	Moderately soluble	High	No	Yes	No	No	No	Yes	No	-7.09	0	0	0	0	0	0.55	0	2	1	3.08
ZINC882	Nc1ncnc2c1nc[nH]2	C5H5N5	135.13	10	9	0	0	3	2	36.09	80.48	0.42	0.13	-0.06	-0.82	0.47	0.03	-1.43	5.07	0.0375	Very soluble	-1.38	5.68	0.0421	Very soluble	-1.77	2.27	0.0168	Soluble	High	No	No	No	No	No	No	No	-7.03	0	3	0	0	1	0.55	0	0	1	1.67
ZINC905	CN(c1nc(nc(n1)N(C)C)N(C)C)C	C9H18N6	210.28	15	6	0.67	3	3	0	62.45	48.39	2.52	2.73	0.07	0.33	-0.93	0.94	-2.96	0.23	0.00109	Soluble	-3.4	0.0837	0.000398	Soluble	-1.62	5.04	0.024	Soluble	High	No	No	Yes	No	No	No	No	-5.64	0	0	0	0	0	0.55	0	0	1	2.59
ZINC922	Nc1ccc(c(c1)O)C(=O)O	C7H7NO3	153.14	11	6	0	1	3	3	39.83	83.55	0.84	1.32	0.68	-0.7	0.02	0.43	-1.96	1.68	0.011	Very soluble	-2.68	0.323	0.00211	Soluble	-0.82	23.1	0.151	Soluble	High	No	No	No	No	No	No	No	-6.3	0	3	0	0	1	0.56	0	1	1	1.04
ZINC941	N#CC(c1cc(cc(c1)C(C#N)(C)C)Cn1ncnc1)(C)C	C17H19N5	293.37	22	11	0.41	4	4	0	83.81	78.29	2.25	2.03	2.93	1.71	2.85	2.35	-3.04	0.265	0.000904	Soluble	-3.3	0.146	0.000499	Soluble	-4.77	0.00498	1.7e-05	Moderately soluble	High	Yes	No	No	No	Yes	No	No	-6.65	0	0	0	0	0	0.55	0	0	0	2.21
ZINC1084	Cn1cnc2c1c(=O)n(C)c(=O)n2C	C8H10N4O2	194.19	14	9	0.38	0	3	0	52.04	61.82	1.79	-0.07	-1.03	-0.59	-0.5	-0.08	-1.48	6.5	0.0335	Very soluble	-0.78	32.5	0.167	Very soluble	-0.67	41.5	0.214	Soluble	High	No	No	No	No	No	No	No	-7.53	0	1	0	0	1	0.55	0	0	1	2.03
ZINC1145	Cc1cc(C2CCCCC2)n(c(=O)c1)O	C12H17NO2	207.27	15	6	0.58	1	2	1	60.1	42.23	2.28	1.99	2.44	2.67	2.16	2.31	-2.61	0.51	0.00246	Soluble	-2.5	0.651	0.00314	Soluble	-2.36	0.901	0.00435	Soluble	High	Yes	No	No	No	No	No	No	-6.15	0	0	0	0	0	0.55	0	1	1	2.51
ZINC1148	CN(CC/C=C/1\c2ccccc2OCc2c1cccc2)C	C19H21NO	279.38	21	12	0.26	3	2	0	87.68	12.47	3.43	4.29	3.81	3.43	4.22	3.83	-4.5	0.00884	3.16e-05	Moderately soluble	-4.26	0.0152	5.43e-05	Moderately soluble	-6.15	0.000196	7.03e-07	Poorly soluble	High	Yes	No	Yes	Yes	No	Yes	No	-4.96	0	0	0	0	0	0.55	0	0	1	3.65
ZINC1175	Clc1ccc2c(c1)N(C(=O)CC(=O)N2C)c1ccccc1	C16H13ClN2O2	300.74	21	12	0.12	1	2	0	89.07	40.62	2.6	2.12	2.61	2.77	2.57	2.53	-3.4	0.121	0.000401	Soluble	-2.6	0.748	0.00249	Soluble	-5.19	0.00196	6.5e-06	Moderately soluble	High	Yes	No	No	Yes	Yes	No	No	-6.63	0	0	0	0	0	0.55	0	1	0	2.54
ZINC1281	OC(=O)Cc1ccccc1Nc1c(Cl)cccc1Cl	C14H11Cl2NO2	296.15	19	12	0.07	4	2	2	77.55	49.33	1.98	4.4	4.36	3.84	3.74	3.66	-4.65	0.00661	2.23e-05	Moderately soluble	-5.15	0.00208	7.03e-06	Moderately soluble	-5.97	0.00032	1.08e-06	Moderately soluble	High	Yes	No	Yes	Yes	Yes	Yes	No	-4.98	0	0	0	0	0	0.85	0	0	1	2.23
ZINC1341	CC[N+](c1cccc(c1)O)(C)C	C10H16NO+	166.24	12	6	0.4	2	2	1	52.66	20.23	-1.4	-3.17	1.98	-1.58	-1.16	-1.07	0.89	1290	7.73	Highly soluble	3.31	342000	2060	Highly soluble	-3.44	0.0609	0.000366	Soluble	High	Yes	Yes	No	No	No	No	No	-9.56	0	0	0	0	2	0.55	0	1	1	1.25
ZINC1370	Clc1ccc2c(c1)C(=NCc1n2cnn1)c1ccccc1	C16H11ClN4	294.74	21	17	0.06	1	3	0	85.69	43.07	2.24	1.72	2.74	2.93	3.67	2.66	-3.28	0.153	0.00052	Soluble	-2.24	1.69	0.00575	Soluble	-6.26	0.000161	5.46e-07	Poorly soluble	High	Yes	Yes	Yes	No	No	No	No	-6.88	0	0	0	0	0	0.55	0	0	0	3.21
ZINC1382	CCC(=C)C(=O)c1ccc(c(c1Cl)Cl)OCC(=O)O	C13H12Cl2O4	303.14	19	6	0.23	6	4	1	73.67	63.6	1.93	3.82	3.61	2.55	3.79	3.14	-3.96	0.033	0.000109	Soluble	-4.85	0.00427	1.41e-05	Moderately soluble	-4.32	0.0144	4.75e-05	Moderately soluble	High	Yes	No	Yes	Yes	No	No	No	-5.44	0	0	0	0	0	0.85	0	1	1	2.43
ZINC1587	Cc1onc(c1)C(=O)NNCc1ccccc1	C12H13N3O2	231.25	17	11	0.17	5	4	2	61.75	67.16	2.19	1.49	1.27	1.18	1.51	1.53	-2.36	1.01	0.00435	Soluble	-2.51	0.718	0.00311	Soluble	-4.61	0.00572	2.47e-05	Moderately soluble	High	Yes	No	Yes	No	No	No	No	-6.65	0	0	0	0	0	0.55	0	0	1	2.82
ZINC1590	NNC(=O)c1ccncc1	C6H7N3O	137.14	10	6	0	2	3	2	35.13	68.01	0.03	-0.7	-0.31	-0.47	-0.27	-0.35	-0.56	37.7	0.275	Very soluble	-0.25	76.6	0.558	Very soluble	-1.64	3.17	0.0231	Soluble	High	No	No	No	No	No	No	No	-7.63	0	3	0	0	1	0.55	0	2	1	1.24
ZINC1655	OC(=O)c1ccccc1Nc1c(Cl)ccc(c1Cl)C	C14H11Cl2NO2	296.15	19	12	0.07	3	2	2	77.93	49.33	2.22	5.16	4.74	3	3.87	3.8	-5.2	0.00188	6.36e-06	Moderately soluble	-5.94	0.000339	1.14e-06	Moderately soluble	-5.95	0.000332	1.12e-06	Moderately soluble	High	Yes	No	Yes	Yes	Yes	No	No	-4.44	0	0	0	0	1	0.85	0	0	1	2.18
ZINC1673	ClCCN(c1ccc(cc1)C[C@@H](C(=O)O)N)CCCl	C13H18Cl2N2O2	305.2	19	6	0.46	8	3	2	78.91	66.56	2.18	0.2	1.92	-0.03	2.36	1.33	-1.56	8.33	0.0273	Very soluble	-1.16	21.3	0.0697	Very soluble	-4.04	0.0278	9.12e-05	Moderately soluble	High	Yes	No	No	No	No	No	No	-8.02	0	0	0	0	0	0.55	1	1	1	2.27
ZINC1728	O=C(C(c1cccnc1)(C)C)c1cccnc1	C14H14N2O	226.27	17	12	0.21	3	3	0	66.21	42.85	1.97	1.99	2.64	1.06	3.06	2.14	-2.82	0.342	0.00151	Soluble	-2.52	0.69	0.00305	Soluble	-4.95	0.00255	1.13e-05	Moderately soluble	High	Yes	No	Yes	Yes	No	No	No	-6.27	0	0	0	0	0	0.55	0	0	1	1.87
ZINC1735	Nc1cc(nc([n+]1[O-])N)N1CCCCC1	C9H15N5O	209.25	15	6	0.56	1	2	2	63.66	93.63	0.97	1.24	-0.5	1	-1.27	0.29	-2.15	1.49	0.0071	Soluble	-2.8	0.328	0.00157	Soluble	-0.27	113	0.538	Soluble	High	No	No	No	No	No	No	No	-6.7	0	1	0	0	0	0.55	0	2	1	2.58
ZINC1773	O=C1CC[C@@]2([C@@]34[C@H]1Oc1c4c(C[C@H]2N(CC3)CC2CC2)ccc1O)O	C20H23NO4	341.4	25	6	0.65	2	5	2	95.29	70	2.33	1.58	1.08	1.61	2.64	1.85	-3	0.343	0.00101	Soluble	-2.66	0.746	0.00218	Soluble	-3.46	0.118	0.000345	Soluble	High	No	Yes	No	No	No	Yes	No	-7.26	0	0	0	0	0	0.55	0	0	0	4.72
ZINC1795	OC(=O)c1cccnc1	C6H5NO2	123.11	9	6	0	1	3	1	31.2	50.19	0.86	0.36	0.78	-1.13	0.75	0.32	-1.26	6.81	0.0553	Very soluble	-0.98	12.9	0.105	Very soluble	-1.35	5.46	0.0444	Soluble	High	Yes	No	No	No	No	No	No	-6.8	0	3	0	0	1	0.85	0	0	1	1
ZINC1931	CN(CCOc1ccccc1Cc1ccccc1)C	C17H21NO	255.35	19	12	0.29	6	2	0	79.7	12.47	3.43	3.79	3.22	3.43	3.76	3.52	-3.88	0.0335	0.000131	Soluble	-3.75	0.0458	0.000179	Soluble	-5.98	0.000265	1.04e-06	Moderately soluble	High	Yes	No	Yes	Yes	No	Yes	No	-5.17	0	0	0	0	0	0.55	0	0	1	2.13
ZINC1979	CCC1(C(=O)NCNC1=O)c1ccccc1	C12H14N2O2	218.25	16	6	0.33	2	2	2	67.05	58.2	1.19	0.91	-0.22	1.06	1.93	0.97	-1.91	2.67	0.0122	Very soluble	-1.72	4.18	0.0192	Very soluble	-4.17	0.0146	6.68e-05	Moderately soluble	High	No	No	No	No	No	No	No	-6.99	0	0	0	0	0	0.55	0	1	1	1.68
ZINC1982	CCCN(S(=O)(=O)c1ccc(cc1)C(=O)O)CCC	C13H19NO4S	285.36	19	6	0.46	7	5	1	73.43	83.06	2.15	3.21	3.28	1.75	1.2	2.32	-3.4	0.113	0.000395	Soluble	-4.63	0.00674	2.36e-05	Moderately soluble	-3.42	0.108	0.000378	Soluble	High	No	No	No	Yes	No	No	No	-5.76	0	0	0	0	0	0.56	0	0	0	2.23
ZINC2005	OC(=N)c1cnccn1	C5H5N3O	123.11	9	6	0	1	4	2	32.16	69.86	0.77	-0.27	0.36	-1.25	0.45	0.01	-0.86	17	0.138	Very soluble	-0.74	22.5	0.183	Very soluble	-1.12	9.23	0.075	Soluble	High	No	No	No	No	No	No	No	-7.24	0	3	0	0	1	0.55	0	2	1	1.9
ZINC2043	CN(CCO[C@@H](c1ccccn1)c1ccc(cc1)Cl)C	C16H19ClN2O	290.79	20	12	0.31	6	3	0	81.91	25.36	3.38	2.9	3.08	2.16	3.54	3.01	-3.52	0.0882	0.000303	Soluble	-3.09	0.235	0.000807	Soluble	-5.86	0.000401	1.38e-06	Moderately soluble	High	Yes	No	No	Yes	No	Yes	Yes	-6.01	0	0	0	0	0	0.55	0	0	0	2.98
ZINC2101	Nc1ccc(cc1)S(=O)(=O)N	C6H8N2O2S	172.2	11	6	0	1	3	2	41.84	94.56	0.61	-0.62	1.01	-0.3	-0.73	-0.01	-0.85	24.1	0.14	Very soluble	-0.89	22	0.128	Very soluble	-1.6	4.33	0.0251	Soluble	High	No	No	No	No	No	No	No	-7.79	0	1	0	0	1	0.55	0	1	1	1.6
ZINC2159	OC[C@@H]1O[C@@H](C[C@H]1O)n1cc(C)c(=O)[nH]c1=O	C10H14N2O5	242.23	17	6	0.6	2	5	3	58.07	104.55	1.25	-1.17	-1.84	-1.15	-0.04	-0.59	-0.73	44.7	0.185	Very soluble	-0.53	71.1	0.293	Very soluble	-0.45	86.3	0.356	Soluble	High	No	No	No	No	No	No	No	-8.61	0	1	0	0	0	0.55	0	0	1	3.64
ZINC2176	O[C@H](COc1nsnc1N1CCOCC1)CNC(C)(C)C	C13H24N4O3S	316.42	21	5	0.85	7	6	2	84.97	107.98	2.82	1.83	0.12	-0.36	1.77	1.24	-2.67	0.678	0.00214	Soluble	-3.72	0.0606	0.000192	Soluble	-2.38	1.33	0.00422	Soluble	High	No	Yes	No	No	No	No	No	-6.93	0	0	0	0	0	0.55	0	0	0	4.23
ZINC2212	Clc1ccc2c(c1)C(=NCc1n2c(C)nn1)c1ccccc1Cl	C17H12Cl2N4	343.21	23	17	0.12	1	3	0	95.66	43.07	2.62	2.42	3.7	3.67	4.79	3.44	-3.97	0.0365	0.000106	Soluble	-2.97	0.37	0.00108	Soluble	-7.24	1.97e-05	5.75e-08	Poorly soluble	High	Yes	Yes	Yes	Yes	Yes	No	No	-6.68	0	0	0	0	0	0.55	0	0	0	3.37
ZINC2272	OC(=O)[C@@H](c1cccc(c1)C(=O)c1ccccc1)C	C16H14O3	254.28	19	12	0.12	4	3	1	72.67	54.37	1.97	3.12	3.11	2.69	3.37	2.85	-3.59	0.066	0.00026	Soluble	-3.93	0.0298	0.000117	Soluble	-4.68	0.00535	2.1e-05	Moderately soluble	High	Yes	No	No	No	No	No	No	-5.64	0	0	0	0	0	0.85	0	0	0	2.57
ZINC2273	O[C@H](c1cc(O)cc(c1)O)CNC(C)C	C11H17NO3	211.26	15	6	0.45	4	4	4	58.65	72.72	1.93	0.72	0.8	0.66	1	1.02	-1.64	4.89	0.0232	Very soluble	-1.83	3.16	0.0149	Very soluble	-2.01	2.08	0.00984	Soluble	High	No	No	No	No	No	No	No	-7.08	0	0	0	0	0	0.55	0	0	1	2.03
ZINC2281	O[C@@H](c1cc(O)cc(c1)O)CNC(C)(C)C	C12H19NO3	225.28	16	6	0.5	4	4	4	63.49	72.72	1.88	0.9	1.19	0.94	1.23	1.23	-1.82	3.43	0.0152	Very soluble	-2.01	2.19	0.00972	Soluble	-2.4	0.907	0.00403	Soluble	High	No	No	No	No	No	No	No	-7.04	0	0	0	0	0	0.55	0	0	1	2.13
ZINC2647	CC(Cc1ccc(cc1)[C@@H](C(=O)O)C)C	C13H18O2	206.28	15	6	0.46	4	2	1	62.18	37.3	2.2	3.5	3.07	3.13	3.15	3.01	-3.36	0.0909	0.000441	Soluble	-3.97	0.0223	0.000108	Soluble	-3.44	0.0749	0.000363	Soluble	High	Yes	No	No	No	No	No	No	-5.07	0	0	0	0	0	0.85	0	0	1	1.92
ZINC3876	Cc1ccc(cc1)c1nc2n(c1CC(=O)N(C)C)cc(cc2)C	C19H21N3O	307.39	23	15	0.26	4	2	0	93.04	37.61	3.12	3.59	3.25	2.36	3.35	3.13	-4.23	0.0183	5.94e-05	Moderately soluble	-4.07	0.0264	8.58e-05	Moderately soluble	-5.83	0.000458	1.49e-06	Moderately soluble	High	Yes	No	Yes	Yes	Yes	Yes	Yes	-5.63	0	0	0	0	0	0.55	0	0	1	2.93
ZINC4028	CCCN([C@H]1CCc2c(C1)cccc2O)CCc1cccs1	C19H25NOS	315.47	22	11	0.47	6	2	1	95.19	51.71	3.55	4.89	4.27	3.55	5.25	4.3	-4.85	0.00445	1.41e-05	Moderately soluble	-5.71	0.000613	1.94e-06	Moderately soluble	-5.81	0.000487	1.55e-06	Moderately soluble	High	Yes	No	Yes	No	Yes	Yes	No	-4.75	0	0	0	0	0	0.55	0	0	1	3.32
ZINC4166	CC(NC[C@H](c1ccc(cc1)NS(=O)(=O)C)O)C	C12H20N2O3S	272.36	18	6	0.5	6	4	3	72.87	86.81	1.51	0.24	1.66	0.48	0.58	0.89	-1.53	8.03	0.0295	Very soluble	-1.62	6.48	0.0238	Very soluble	-3.51	0.0834	0.000306	Soluble	High	No	No	No	No	No	No	No	-7.79	0	0	0	0	0	0.55	0	0	0	2.39
ZINC4319	C[C@H](CCc1ccccc1)NC[C@@H](c1ccc(c(c1)C(=O)N)O)O	C19H24N2O3	328.41	24	12	0.32	8	4	4	94.01	95.58	2.74	3.09	1.81	1.93	2.72	2.46	-3.66	0.0711	0.000216	Soluble	-4.76	0.00564	1.72e-05	Moderately soluble	-5.08	0.00274	8.34e-06	Moderately soluble	High	No	Yes	No	No	No	Yes	No	-6.11	0	0	0	0	0	0.55	0	0	1	3
ZINC4413	CCN(C(=O)Oc1cccc(c1)[C@@H](N(C)C)C)C	C14H22N2O2	250.34	18	6	0.5	6	3	0	73.12	32.78	3.2	2.29	2.44	2.34	1.46	2.34	-2.69	0.517	0.00206	Soluble	-2.62	0.606	0.00242	Soluble	-3.15	0.176	0.000701	Soluble	High	Yes	No	No	No	No	No	No	-6.2	0	0	0	0	0	0.55	0	0	0	2.73
ZINC4448	O=C1[C@H](CCc2c1c1ccccc1n2C)Cn1ccnc1C	C18H19N3O	293.36	22	14	0.33	2	2	0	87.39	39.82	2.33	2.29	3.13	1.75	2.95	2.49	-3.44	0.106	0.000363	Soluble	-2.76	0.505	0.00172	Soluble	-4.93	0.00348	1.19e-05	Moderately soluble	High	Yes	Yes	Yes	Yes	No	Yes	Yes	-6.46	0	0	0	0	0	0.55	0	0	0	3.13
ZINC4785	NC(=O)N1c2ccccc2C=Cc2c1cccc2	C15H12N2O	236.27	18	12	0	1	1	1	76.05	46.33	2.1	2.45	2.79	2.99	1.65	2.4	-3.28	0.125	0.00053	Soluble	-3.07	0.203	0.000858	Soluble	-3.93	0.0278	0.000117	Soluble	High	Yes	Yes	Yes	Yes	No	No	No	-6	0	0	0	0	0	0.55	0	1	1	2.93
ZINC4949	NCC1(CCCCC1)CC(=O)O	C9H17NO2	171.24	12	0	0.89	3	3	2	47.48	63.32	1.44	-1.1	1.37	1	1.24	0.79	-0.01	167	0.976	Very soluble	0.26	312	1.82	Highly soluble	-1.35	7.56	0.0442	Soluble	High	Yes	No	No	No	No	No	No	-8.13	0	0	0	0	1	0.55	0	0	1	1.63
ZINC5151	CCCN([C@@H]1CCc2c(C1)cccc2O)CCc1cccs1	C19H25NOS	315.47	22	11	0.47	6	2	1	95.19	51.71	3.7	4.89	4.27	3.55	5.25	4.33	-4.85	0.00445	1.41e-05	Moderately soluble	-5.71	0.000613	1.94e-06	Moderately soluble	-5.81	0.000487	1.55e-06	Moderately soluble	High	Yes	No	Yes	No	Yes	Yes	No	-4.75	0	0	0	0	0	0.55	0	0	1	3.32
ZINC5823	CC(N/C(=N/S(=O)(=O)c1cnccc1Nc1cccc(c1)C)/O)C	C16H20N4O3S	348.42	24	12	0.25	6	5	3	94.32	112.06	2.71	3.21	3.82	1.77	1.39	2.58	-4	0.0351	0.000101	Soluble	-5.24	0.00203	5.81e-06	Moderately soluble	-5.26	0.00191	5.48e-06	Moderately soluble	High	No	No	No	No	Yes	No	No	-6.15	0	0	0	0	0	0.55	0	2	0	3.53
ZINC5878	NC(=O)c1cccnc1	C6H6N2O	122.12	9	6	0	1	2	1	32.33	55.98	0.7	-0.37	0.18	-0.43	0.52	0.12	-0.79	19.7	0.162	Very soluble	-0.34	55.5	0.454	Very soluble	-1.57	3.3	0.027	Soluble	High	No	No	No	No	No	No	No	-7.31	0	3	0	0	1	0.55	0	0	1	1
ZINC5895	CN(CCc1c[nH]c2c1cc(cc2)Cn1cncn1)C	C15H19N5	269.34	20	14	0.33	5	3	1	79.91	49.74	2.28	2.02	1.91	1.49	2.16	1.97	-2.97	0.288	0.00107	Soluble	-2.69	0.548	0.00203	Soluble	-4.77	0.00461	1.71e-05	Moderately soluble	High	Yes	Yes	Yes	No	No	Yes	No	-6.51	0	0	0	0	0	0.55	0	0	0	2.19
ZINC6157	NC1=NC[C@H]2N1c1ccccc1Cc1c2cccc1	C16H15N3	249.31	19	12	0.19	0	1	1	83.49	41.62	2.18	3.51	1.38	3.05	2.6	2.54	-4.06	0.0215	8.62e-05	Moderately soluble	-4.07	0.0213	8.56e-05	Moderately soluble	-4.8	0.00393	1.58e-05	Moderately soluble	High	Yes	Yes	Yes	No	No	Yes	No	-5.33	0	0	0	0	0	0.55	0	0	2	3.6
ZINC6310	Nc1ccc(cc1)S(=O)(=O)c1ccc(cc1)N	C12H12N2O2S	248.3	17	12	0	2	2	2	67.19	94.56	1.26	0.97	2.78	1.87	0.85	1.55	-2.38	1.03	0.00416	Soluble	-2.54	0.71	0.00286	Soluble	-4.13	0.0185	7.46e-05	Moderately soluble	High	No	No	No	No	No	No	No	-7.13	0	0	0	0	0	0.55	0	1	1	1.92
ZINC7601	OCc1cc(ccc1O)[C@H](CNC(C)(C)C)O	C13H21NO3	239.31	17	6	0.54	5	4	4	67.6	72.72	1.95	0.31	0.83	0.95	1.62	1.13	-1.45	8.49	0.0355	Very soluble	-1.4	9.53	0.0398	Very soluble	-2.8	0.38	0.00159	Soluble	High	No	No	No	No	No	No	No	-7.54	0	0	0	0	0	0.55	0	0	1	2.3
ZINC8667	OC(=O)[C@@H](c1ccc(c(c1)F)c1ccccc1)C	C15H13FO2	244.26	18	12	0.13	3	3	1	68.19	37.3	2.18	4.16	4.1	3.79	3.87	3.62	-4.27	0.0131	5.36e-05	Moderately soluble	-4.65	0.00545	2.23e-05	Moderately soluble	-5.01	0.00239	9.79e-06	Moderately soluble	High	Yes	No	No	No	No	No	No	-4.84	0	0	0	0	0	0.85	0	0	2	2.45
ZINC9073	CN1CCc2c3[C@H]1Cc1ccc(c(c1c3ccc2)O)O	C17H17NO2	267.32	20	12	0.29	0	3	2	83.02	43.7	2.57	2.3	2.14	2.43	2.89	2.47	-3.39	0.109	0.000407	Soluble	-2.86	0.373	0.00139	Soluble	-4.36	0.0116	4.36e-05	Moderately soluble	High	Yes	Yes	Yes	No	No	Yes	No	-6.3	0	0	0	0	0	0.55	1	1	0	3.26
ZINC11012	OC(=O)[C@H]1CCn2c1ccc2C(=O)c1ccccc1	C15H13NO3	255.27	19	11	0.2	3	3	1	69.81	59.3	1.99	2.72	2.29	1.24	2.01	2.05	-3.37	0.11	0.00043	Soluble	-3.62	0.0614	0.00024	Soluble	-3.23	0.152	0.000594	Soluble	High	Yes	No	No	No	No	No	No	-5.93	0	0	0	0	0	0.85	0	0	0	2.79
ZINC13156	Nc1nnc(c(n1)N)c1cccc(c1Cl)Cl	C9H7Cl2N5	256.09	16	12	0	1	3	2	64.09	90.71	1.51	1.42	2.03	1.75	1.75	1.69	-2.81	0.395	0.00154	Soluble	-2.93	0.301	0.00118	Soluble	-4.32	0.0124	4.83e-05	Moderately soluble	High	No	Yes	Yes	No	No	No	No	-6.85	0	0	0	0	0	0.55	0	0	0	2.72
ZINC14037	NC[C@H]1C[C@@]1(c1ccccc1)C(=O)N(CC)CC	C15H22N2O	246.35	18	6	0.53	6	2	1	73.44	46.33	2.66	1.36	1.77	1.97	2.31	2.01	-2.07	2.07	0.00842	Soluble	-1.94	2.86	0.0116	Very soluble	-3.91	0.0306	0.000124	Soluble	High	Yes	No	No	No	No	Yes	No	-6.84	0	0	0	0	0	0.55	0	0	1	2.63
ZINC14257	CN1C(=O)C[C@](C1=O)(C)c1ccccc1	C12H13NO2	203.24	15	6	0.33	1	2	0	60.42	37.38	1.94	1.2	0.95	1.5	2.17	1.55	-2.09	1.67	0.0082	Soluble	-1.58	5.33	0.0262	Very soluble	-3.39	0.083	0.000408	Soluble	High	Yes	No	No	No	No	No	No	-6.69	0	0	0	0	0	0.55	0	1	1	1.93
ZINC20221	COc1ccc2c(c1)ccc(c2)CCC(=O)C	C15H16O2	228.29	17	10	0.27	4	2	0	70.03	26.3	2.74	3.08	3.37	2.9	4.06	3.23	-3.37	0.098	0.000429	Soluble	-3.3	0.115	0.000502	Soluble	-5.35	0.00101	4.44e-06	Moderately soluble	High	Yes	No	Yes	Yes	No	Yes	No	-5.51	0	0	0	0	0	0.55	0	0	1	1.34
ZINC20228	Clc1cccc(c1)C(=O)[C@@H](NC(C)(C)C)C	C13H18ClNO	239.74	16	6	0.46	4	2	1	68.52	29.1	2.65	3.22	3.3	2.85	3.35	3.07	-3.37	0.103	0.000428	Soluble	-3.5	0.0752	0.000314	Soluble	-4.67	0.00517	2.16e-05	Moderately soluble	High	Yes	No	Yes	No	No	Yes	No	-5.48	0	0	0	0	0	0.55	0	0	1	2.11
ZINC20237	CCN(CC(=O)Nc1c(C)cccc1C)CC	C14H22N2O	234.34	17	6	0.5	6	2	1	72.81	32.34	2.86	2.26	2.39	2.38	2.64	2.5	-2.58	0.614	0.00262	Soluble	-2.58	0.623	0.00266	Soluble	-4.5	0.00733	3.13e-05	Moderately soluble	High	Yes	No	No	No	No	Yes	No	-6.12	0	0	0	0	0	0.55	0	0	1	1.77
ZINC20241	OC(=O)c1ccccc1Nc1cccc(c1C)C	C15H15NO2	241.29	18	12	0.13	3	2	2	72.88	49.33	2.34	5.12	3.75	2.22	3.1	3.3	-4.86	0.00335	1.39e-05	Moderately soluble	-5.9	0.000304	1.26e-06	Moderately soluble	-5.12	0.00183	7.57e-06	Moderately soluble	High	Yes	No	Yes	No	Yes	Yes	No	-4.14	0	0	0	0	1	0.85	0	0	2	2.01
ZINC20244	CN(CCOC(c1ccccc1)c1ccccc1)C	C17H21NO	255.35	19	12	0.29	6	2	0	79.1	12.47	3.19	3.27	3.03	3.16	3.46	3.22	-3.55	0.0712	0.000279	Soluble	-3.21	0.159	0.000622	Soluble	-5.63	0.000601	2.36e-06	Moderately soluble	High	Yes	No	Yes	No	No	Yes	No	-5.54	0	0	0	0	0	0.55	0	0	0	2.12
ZINC20245	CN(CCCN1c2ccccc2CCc2c1cccc2)C	C19H24N2	280.41	21	12	0.37	4	1	0	93.76	6.48	3.3	4.8	3.49	3.78	3.64	3.8	-4.76	0.00486	1.73e-05	Moderately soluble	-4.67	0.00602	2.15e-05	Moderately soluble	-6.12	0.000211	7.52e-07	Poorly soluble	High	Yes	No	Yes	No	No	Yes	No	-4.6	0	0	0	0	0	0.55	0	0	1	2.99
ZINC20251	Cc1ccc(cc1)N(c1cccc(c1)O)CC1=NCCN1	C17H19N3O	281.35	21	12	0.24	4	2	2	93.91	47.86	2.28	2.64	2.08	2.57	3.14	2.54	-3.41	0.11	0.000392	Soluble	-3.3	0.142	0.000506	Soluble	-5.38	0.00117	4.17e-06	Moderately soluble	High	Yes	Yes	Yes	No	No	Yes	No	-6.14	0	0	0	0	0	0.55	0	0	0	3.2
ZINC20257	C[C@H](COc1c(C)cccc1C)N	C11H17NO	179.26	13	6	0.45	3	2	1	55.19	35.25	2.51	2.15	2.03	2.12	2.45	2.25	-2.45	0.637	0.00355	Soluble	-2.52	0.538	0.003	Soluble	-3.39	0.0727	0.000406	Soluble	High	Yes	No	No	No	No	No	No	-5.87	0	0	0	0	1	0.55	0	0	1	2
ZINC20259	CN[C@H]([C@H](c1ccccc1)O)C	C10H15NO	165.23	12	6	0.4	3	2	2	49.79	32.26	1.93	0.93	1	1.56	1.56	1.4	-1.62	3.94	0.0239	Very soluble	-1.19	10.6	0.064	Very soluble	-2.74	0.303	0.00183	Soluble	High	Yes	No	No	No	No	No	No	-6.65	0	0	0	0	1	0.55	0	0	1	1.76
ZINC34157	C[C@@H]([C@@H](c1ccc(c(c1)O)O)O)N	C9H13NO3	183.2	13	6	0.33	2	4	4	48.94	86.71	1.32	-0.83	0.15	0.07	0.2	0.18	-0.66	39.9	0.218	Very soluble	-0.51	56.5	0.308	Very soluble	-0.8	29.2	0.159	Soluble	High	No	No	No	No	No	No	No	-8.01	0	0	0	0	1	0.55	1	1	1	2.15
ZINC39089	CNC[C@@H](c1ccc(c(c1)O)O)O	C9H13NO3	183.2	13	6	0.33	3	4	4	49.03	72.72	1.35	-1.37	0.03	0.07	0.44	0.1	-0.26	102	0.554	Very soluble	0.34	404	2.2	Highly soluble	-1.56	4.99	0.0272	Soluble	High	No	No	No	No	No	No	No	-8.39	0	0	0	0	1	0.55	1	1	1	1.79
ZINC44027	CN(CCCN1c2ccccc2Sc2c1cc(Cl)cc2)C	C17H19ClN2S	318.86	21	12	0.29	4	1	0	95.08	31.78	3.47	5.19	4.51	4.35	3.94	4.29	-5.25	0.00181	5.68e-06	Moderately soluble	-5.6	0.000793	2.49e-06	Moderately soluble	-6.28	0.000169	5.31e-07	Poorly soluble	High	Yes	No	Yes	Yes	Yes	Yes	No	-4.56	1	0	0	0	1	0.55	0	0	1	3.12
ZINC49154	OCc1c(CO)cnc(c1O)C	C8H11NO3	169.18	12	6	0.38	2	4	3	43.48	73.58	0.8	-0.77	-0.22	-0.91	1	-0.02	-0.64	38.6	0.228	Very soluble	-0.3	85.3	0.504	Very soluble	-1.49	5.46	0.0323	Soluble	High	No	No	No	No	No	No	No	-7.88	0	0	0	0	1	0.55	0	0	1	1.76
ZINC56556	O[C@H](COc1cccc2c1cccc2)CNC(C)C	C16H21NO2	259.34	19	10	0.38	6	3	2	78.44	41.49	3.25	2.98	2.58	2.35	3.04	2.84	-3.32	0.124	0.00048	Soluble	-3.51	0.0793	0.000306	Soluble	-4.97	0.00275	1.06e-05	Moderately soluble	High	Yes	No	Yes	No	No	Yes	No	-5.77	0	0	0	0	0	0.55	0	0	0	2.43
ZINC56645	O[C@H](COc1cccc2c1cc[nH]2)CNC(C)C	C14H20N2O2	248.32	18	9	0.43	6	3	3	72.79	57.28	2.6	1.75	1.91	0.91	2.53	1.94	-2.46	0.869	0.0035	Soluble	-2.57	0.668	0.00269	Soluble	-4.19	0.0161	6.5e-05	Moderately soluble	High	Yes	Yes	No	No	No	No	No	-6.57	0	0	0	0	0	0.55	0	0	1	2.51
ZINC56653	CC(NC[C@H](c1ccc(c(c1)O)O)O)C	C11H17NO3	211.26	15	6	0.45	4	4	4	58.65	72.72	2.12	-3.49	0.8	0.66	1	0.22	1.02	2200	10.4	Highly soluble	2.54	73800	349	Highly soluble	-2.01	2.08	0.00984	Soluble	High	No	No	No	No	No	No	No	-10.07	0	0	0	0	1	0.55	1	1	1	2.04
ZINC57062	C[C@@H](COc1c(C)cccc1C)N	C11H17NO	179.26	13	6	0.45	3	2	1	55.19	35.25	2.46	2.15	2.03	2.12	2.45	2.24	-2.45	0.637	0.00355	Soluble	-2.52	0.538	0.003	Soluble	-3.39	0.0727	0.000406	Soluble	High	Yes	No	No	No	No	No	No	-5.87	0	0	0	0	1	0.55	0	0	1	2
ZINC57146	OC[C@H](Cn1cnc2c1c(=O)n(C)c(=O)n2C)O	C10H14N4O4	254.24	18	9	0.5	3	5	2	63.98	102.28	1.58	-1.82	-2.21	-1.56	-1.19	-1.04	-0.44	91.9	0.362	Very soluble	0.19	393	1.55	Highly soluble	0.01	259	1.02	Soluble	Low	No	No	No	No	No	No	No	-9.14	0	1	0	0	0	0.55	0	0	0	2.9
ZINC57253	CN(CC[C@](c1ccccc1Cl)(c1ccccc1)O)C	C17H20ClNO	289.8	20	12	0.29	5	2	1	84.07	23.47	2.97	3.58	3.42	3.67	3.79	3.49	-4.01	0.0286	9.86e-05	Moderately soluble	-3.76	0.0505	0.000174	Soluble	-5.92	0.00035	1.21e-06	Moderately soluble	High	Yes	No	No	No	No	Yes	No	-5.53	0	0	0	0	0	0.55	0	0	1	2.56
ZINC57254	CN(CC[C@@](c1ccccc1Cl)(c1ccccc1)O)C	C17H20ClNO	289.8	20	12	0.29	5	2	1	84.07	23.47	3.17	3.58	3.42	3.67	3.79	3.52	-4.01	0.0286	9.86e-05	Moderately soluble	-3.76	0.0505	0.000174	Soluble	-5.92	0.00035	1.21e-06	Moderately soluble	High	Yes	No	No	No	No	Yes	No	-5.53	0	0	0	0	0	0.55	0	0	1	2.56
ZINC57255	O=C1N[C@](c2c1cccc2)(O)c1ccc(c(c1)S(=O)(=O)N)Cl	C14H11ClN2O4S	338.77	22	12	0.07	2	5	3	82.93	117.87	1.52	0.85	1.52	1.63	1.18	1.34	-2.75	0.606	0.00179	Soluble	-2.91	0.418	0.00123	Soluble	-4.97	0.00363	1.07e-05	Moderately soluble	High	No	No	No	No	No	No	No	-7.76	0	0	0	0	0	0.55	0	0	0	2.93
ZINC57313	CC[C@]1(OCCc2c1[nH]c1c2cccc1CC)CC(=O)O	C17H21NO3	287.35	21	9	0.47	4	3	2	82.66	62.32	2.3	2.81	3.27	2.12	4.31	2.96	-3.45	0.103	0.000359	Soluble	-3.78	0.0481	0.000168	Soluble	-5.2	0.00181	6.31e-06	Moderately soluble	High	Yes	Yes	Yes	Yes	No	Yes	No	-6.06	0	0	0	0	0	0.85	0	0	0	3.47
ZINC57340	COc1ccccc1OC[C@@H](COC(=O)N)O	C11H15NO5	241.24	17	6	0.36	7	5	2	59.39	91.01	2.16	0.61	0.53	0.15	0.41	0.77	-1.52	7.3	0.0303	Very soluble	-2.1	1.94	0.00803	Soluble	-1.89	3.14	0.013	Soluble	High	No	No	No	No	No	No	No	-7.34	0	0	0	0	0	0.55	0	0	1	2.63
ZINC57435	Cc1cc(c(c(c1CC1=NCCN1)C)O)C(C)(C)C	C16H24N2O	260.37	19	6	0.56	3	2	2	88.67	44.62	2.92	2.86	2.09	2.89	4.68	3.09	-3.29	0.133	0.000511	Soluble	-3.46	0.0911	0.00035	Soluble	-5.13	0.00193	7.41e-06	Moderately soluble	High	Yes	No	No	No	No	Yes	No	-5.86	0	0	0	0	0	0.55	0	0	0	2.93
ZINC57464	CCc1nc(N)nc(c1c1ccc(cc1)Cl)N	C12H13ClN4	248.71	17	12	0.17	2	2	2	71.06	77.82	2.15	2.69	2.54	2.05	2.44	2.37	-3.47	0.0848	0.000341	Soluble	-3.98	0.0262	0.000105	Soluble	-4.87	0.00339	1.36e-05	Moderately soluble	High	Yes	No	Yes	Yes	No	No	No	-5.91	0	0	0	0	0	0.55	0	0	1	2.43
ZINC57512	O/C(=N\S(=O)(=O)c1ccc(cc1)C)/NN1CCCCCC1	C14H21N3O3S	311.4	21	6	0.5	4	5	2	86.1	90.38	2.6	3.38	2.68	2.57	0.85	2.42	-3.85	0.0442	0.000142	Soluble	-4.96	0.00344	1.11e-05	Moderately soluble	-3.27	0.168	0.000541	Soluble	High	No	No	No	No	Yes	No	No	-5.8	0	0	0	0	0	0.55	0	2	0	3.22
ZINC57533	CCN(C(=O)[C@@H](c1ccccc1)CO)Cc1ccncc1	C17H20N2O2	284.35	21	12	0.29	7	3	1	81.98	53.43	2.36	1.46	2.05	1.36	2.67	1.98	-2.48	0.934	0.00328	Soluble	-2.19	1.84	0.00648	Soluble	-4.9	0.0036	1.26e-05	Moderately soluble	High	Yes	No	No	No	No	Yes	No	-7	0	0	0	0	0	0.55	0	0	0	2.42
ZINC75008	CC[C@@H]1C(=O)OC[C@@H]1Cc1cncn1C	C11H16N2O2	208.26	15	5	0.64	3	3	0	56.47	44.12	1.81	0.12	1.16	0.9	1.63	1.13	-1.26	11.6	0.0555	Very soluble	-0.6	52	0.25	Very soluble	-2.28	1.1	0.00527	Soluble	High	Yes	No	No	No	No	No	No	-7.49	0	0	0	0	0	0.55	0	0	1	3.09
ZINC75126	O=C1[C@@H](CCc2c1c1ccccc1n2C)Cn1ccnc1C	C18H19N3O	293.36	22	14	0.33	2	2	0	87.39	39.82	2.57	2.29	3.13	1.75	2.95	2.54	-3.44	0.106	0.000363	Soluble	-2.76	0.505	0.00172	Soluble	-4.93	0.00348	1.19e-05	Moderately soluble	High	Yes	Yes	Yes	Yes	No	Yes	Yes	-6.46	0	0	0	0	0	0.55	0	0	0	3.13
ZINC83315	OC(=O)[C@H](Cc1c[nH]c2c1cccc2)N	C11H12N2O2	204.23	15	9	0.18	3	3	3	57.36	79.11	0.99	-1.06	1.12	-1.66	1.53	0.18	-0.68	42.2	0.207	Very soluble	-0.11	158	0.772	Very soluble	-2.76	0.357	0.00175	Soluble	High	No	No	No	No	No	No	No	-8.3	0	0	0	0	0	0.55	0	0	1	2.09
ZINC85733	NC[C@H](c1ccc(cc1)Cl)CC(=O)O	C10H12ClNO2	213.66	14	6	0.3	4	3	2	55.32	63.32	1.55	-0.96	1.86	1.96	1.87	1.26	-0.61	52.1	0.244	Very soluble	0.12	279	1.3	Highly soluble	-2.89	0.273	0.00128	Soluble	High	Yes	No	No	No	No	No	No	-8.28	0	0	0	0	0	0.55	0	0	1	1.81
ZINC89763	Nc1ccc(cc1)S(=O)(=O)Nc1noc(c1)C	C10H11N3O3S	253.28	17	11	0.1	3	4	2	62.99	106.6	1.03	0.89	2.26	-0.15	0.16	0.84	-2.25	1.42	0.0056	Soluble	-2.71	0.49	0.00193	Soluble	-3.77	0.0434	0.000171	Soluble	High	No	No	No	No	No	No	No	-7.21	0	0	0	0	0	0.55	0	1	0	2.73
ZINC97996	CN1CCCN=C1/C=C/c1cccs1	C11H14N2S	206.31	14	5	0.36	2	1	0	70.15	43.84	2.59	1.56	1.62	2.14	3.91	2.37	-2.23	1.2	0.00583	Soluble	-2.09	1.67	0.00812	Soluble	-2.63	0.486	0.00236	Soluble	High	Yes	No	Yes	No	No	No	No	-6.45	0	0	0	0	0	0.55	0	0	1	3.2
ZINC105196	N[C@H](C(=O)O)Cc1ccccc1	C9H11NO2	165.19	12	6	0.22	3	3	2	45.5	63.32	1.08	-1.52	0.64	-1.11	0.86	-0.01	-0.08	138	0.835	Very soluble	0.7	821	4.97	Highly soluble	-1.86	2.3	0.0139	Soluble	High	No	No	No	No	No	No	No	-8.39	0	0	0	0	1	0.55	0	0	1	1.46
ZINC113355	CNC[C@@H](c1cccc(c1)O)O	C9H13NO2	167.21	12	6	0.33	3	3	3	47.01	52.49	1.67	-0.31	0.32	0.65	0.91	0.65	-0.85	23.4	0.14	Very soluble	-0.33	77.9	0.466	Very soluble	-2.13	1.23	0.00738	Soluble	High	No	No	No	No	No	No	No	-7.54	0	0	0	0	1	0.55	0	0	1	1.62
ZINC113382	OC[C@H]([C@@H](c1ccc(cc1)[N+](=O)[O-])O)NC(=O)C(Cl)Cl	C11H12Cl2N2O5	323.13	20	6	0.36	7	5	3	74.38	115.38	1.17	1.14	0.58	0.02	-0.26	0.53	-2.32	1.54	0.00477	Soluble	-3.16	0.225	0.000696	Soluble	-2.39	1.32	0.00409	Soluble	High	No	No	No	No	No	No	No	-7.46	0	0	0	0	0	0.55	0	3	0	2.78
ZINC113398	CC(Cc1ccc(cc1)[C@H](C(=O)O)C)C	C13H18O2	206.28	15	6	0.46	4	2	1	62.18	37.3	2.21	3.5	3.07	3.13	3.15	3.01	-3.36	0.0909	0.000441	Soluble	-3.97	0.0223	0.000108	Soluble	-3.44	0.0749	0.000363	Soluble	High	Yes	No	No	No	No	No	No	-5.07	0	0	0	0	0	0.85	0	0	1	1.92
ZINC113415	O[C@H](COc1ccc(cc1)CC(=O)N)CNC(C)C	C14H22N2O3	266.34	19	6	0.5	8	4	3	73.61	84.58	2.17	0.16	0.45	0.69	1.52	1	-1.3	13.4	0.0504	Very soluble	-1.49	8.55	0.0321	Very soluble	-3.29	0.136	0.000511	Soluble	High	No	No	No	No	No	No	No	-7.81	0	0	0	0	0	0.55	0	0	1	2.51
ZINC113446	CCS(=O)(=O)CCn1c(C)ncc1[N+](=O)[O-]	C8H13N3O4S	247.27	16	5	0.62	5	5	0	60.66	106.16	1.19	-0.35	1.62	-0.66	-1.43	0.07	-1.05	21.8	0.0883	Very soluble	-1.42	9.46	0.0383	Very soluble	-1.71	4.81	0.0195	Soluble	High	No	No	No	No	No	No	No	-8.06	0	0	0	0	0	0.55	0	2	1	2.73
ZINC114127	N[C@H](C(S)(C)C)C(=O)O	C5H11NO2S	149.21	9	0	0.8	2	3	2	38.6	102.12	0.85	-1.78	0.11	-2.2	-0.42	-0.69	0.49	459	3.08	Highly soluble	0.15	211	1.42	Highly soluble	0.14	207	1.39	Soluble	High	No	No	No	No	No	No	No	-8.47	0	2	0	0	1	0.55	0	1	1	1.83
ZINC119344	O=C(c1ccc(cc1)N)NCC(=O)O	C9H10N2O3	194.19	14	6	0.11	4	3	3	50.42	92.42	0.95	-0.89	0.09	0.28	-0.04	0.08	-0.54	56.5	0.291	Very soluble	-0.57	52.5	0.27	Very soluble	-1.82	2.93	0.0151	Soluble	High	No	No	No	No	No	No	No	-8.12	0	0	0	0	1	0.56	0	1	1	1.05
ZINC119717	C1CN=C(N1)Cc1cccc2c1cccc2	C14H14N2	210.27	16	10	0.21	2	1	1	74.95	24.39	2.14	2.07	1.62	2.79	4	2.53	-2.78	0.35	0.00167	Soluble	-2.21	1.29	0.00615	Soluble	-5.4	0.000839	3.99e-06	Moderately soluble	High	Yes	No	Yes	No	No	Yes	No	-6.11	0	0	0	0	0	0.55	0	0	1	2.55
ZINC121541	COC(=O)/N=c/1\[nH]c2c([nH]1)cc(cc2)C(=O)c1ccccc1	C16H13N3O3	295.29	22	15	0.06	4	4	2	80.43	87.31	2.49	2.37	2.39	1.75	3.65	2.53	-3.4	0.116	0.000394	Soluble	-3.84	0.0423	0.000143	Soluble	-5.5	0.000942	3.19e-06	Moderately soluble	High	No	No	Yes	No	No	No	No	-6.42	0	0	0	0	0	0.55	0	0	0	2.57
ZINC136138	COc1ccc(c(c1)O)C(=O)c1ccccc1	C14H12O3	228.24	17	12	0.07	3	3	1	64.83	46.53	2.43	3.79	2.63	1.99	2.92	2.75	-3.97	0.0246	0.000108	Soluble	-4.46	0.00789	3.46e-05	Moderately soluble	-4.42	0.00862	3.78e-05	Moderately soluble	High	Yes	No	Yes	Yes	Yes	No	No	-5	0	0	0	0	0	0.55	0	0	2	1.8
ZINC154964	CN1CCCC[C@H]1C(=O)Nc1c(C)cccc1C	C15H22N2O	246.35	18	6	0.53	3	2	1	79.42	32.34	2.97	1.95	2.15	2.24	2.67	2.4	-2.64	0.559	0.00227	Soluble	-2.25	1.37	0.00557	Soluble	-4.06	0.0215	8.73e-05	Moderately soluble	High	Yes	No	No	No	No	Yes	No	-6.42	0	0	0	0	0	0.55	0	0	1	2.38
ZINC155531	CN(CCOC(=O)[C@H](C1(O)CCCC1)c1ccccc1)C	C17H25NO3	291.39	21	6	0.59	7	4	1	82.74	49.77	3.64	2.74	2.18	2.02	2.73	2.66	-3.12	0.22	0.000755	Soluble	-3.44	0.106	0.000363	Soluble	-3.85	0.0412	0.000141	Soluble	High	Yes	No	No	No	No	Yes	No	-6.13	0	0	0	0	0	0.55	0	0	0	3.19
ZINC155694	ClCCN([P@@]1(=O)NCCCO1)CCCl	C7H15Cl2N2O2P	261.09	14	0	1	5	4	1	62.6	51.38	2.47	0.63	1.5	0.97	1.13	1.34	-1.53	7.78	0.0298	Very soluble	-1.28	13.6	0.052	Very soluble	-2.71	0.508	0.00195	Soluble	High	Yes	No	No	No	No	No	No	-7.45	0	0	0	0	0	0.55	0	2	0	4.15
ZINC155905	C[C@@H](C(=O)NCC(=O)O)S	C5H9NO3S	163.19	10	0	0.6	4	3	2	38.85	105.2	0.62	-0.14	-0.49	-0.54	-0.36	-0.18	-0.5	51.7	0.317	Very soluble	-1.62	3.96	0.0243	Very soluble	-0.2	104	0.637	Soluble	High	No	No	No	No	No	No	No	-7.39	0	3	0	0	1	0.56	0	1	1	1.85
ZINC266964	OC(=O)[C@H](Cc1ccc(cc1)O)N	C9H11NO3	181.19	13	6	0.22	3	4	3	47.52	83.55	0.84	-2.26	0.35	-1.7	0.39	-0.48	0.32	376	2.07	Highly soluble	1.04	1980	11	Highly soluble	-1.29	9.29	0.0513	Soluble	High	No	No	No	No	No	No	No	-9.01	0	0	0	0	2	0.55	0	0	1	1.54
ZINC389149	O[C@H](COc1cc(C)c(c(c1C)C)OC(=O)C)CNC(C)C	C17H27NO4	309.4	22	6	0.59	8	5	2	87.33	67.79	3.62	2.66	2.27	2.12	3.52	2.84	-3.11	0.241	0.00078	Soluble	-3.74	0.0569	0.000184	Soluble	-4.52	0.00937	3.03e-05	Moderately soluble	High	Yes	Yes	No	No	No	Yes	No	-6.3	0	0	0	0	0	0.55	0	1	1	3.11
ZINC389747	C=CCN1CC[C@@]23[C@@]4([C@H]1Cc1c3c(O[C@H]2C(=O)CC4)c(cc1)O)O	C19H21NO4	327.37	24	6	0.53	2	5	2	92.12	70	1.81	2.09	0.92	1.3	2.56	1.74	-3.24	0.189	0.000576	Soluble	-3.19	0.211	0.000646	Soluble	-3.32	0.158	0.000482	Soluble	High	No	Yes	No	No	No	Yes	No	-6.81	0	0	0	0	0	0.55	0	1	0	4.63
ZINC402830	Clc1ccc(cc1)[C@@](c1ccccc1)(OCC[C@H]1CCCN1C)C	C21H26ClNO	343.89	24	12	0.43	6	2	0	105.03	12.47	4	5.03	4.62	4.18	5.15	4.59	-5.12	0.00264	7.67e-06	Moderately soluble	-5.03	0.00319	9.27e-06	Moderately soluble	-7.08	2.85e-05	8.28e-08	Poorly soluble	High	Yes	No	No	No	No	Yes	Yes	-4.83	1	0	0	0	1	0.55	0	0	1	3.41
ZINC402954	O=C1CC[C@@H]2[C@@]34[C@H]1Oc1c4c(C[C@H]2N(CC3)C)ccc1O	C17H19NO3	285.34	21	6	0.59	0	4	1	81.78	49.77	2.24	1.84	1.25	1.74	2.34	1.88	-2.98	0.299	0.00105	Soluble	-2.51	0.89	0.00312	Soluble	-3.23	0.168	0.000589	Soluble	High	Yes	Yes	No	No	No	Yes	No	-6.73	0	0	0	0	0	0.55	0	0	0	4.33
ZINC403010	C[C@@H](CCc1ccccc1)NC[C@@H](c1ccc(c(c1)C(=O)N)O)O	C19H24N2O3	328.41	24	12	0.32	8	4	4	94.01	95.58	2.89	3.09	1.81	1.93	2.72	2.49	-3.66	0.0711	0.000216	Soluble	-4.76	0.00564	1.72e-05	Moderately soluble	-5.08	0.00274	8.34e-06	Moderately soluble	High	No	Yes	No	No	No	Yes	No	-6.11	0	0	0	0	0	0.55	0	0	1	3
ZINC403566	O=C(N1CC(=O)N2[C@H](C1)c1ccccc1CC2)C1CCCCC1	C19H24N2O2	312.41	23	6	0.58	2	2	0	96.93	40.62	2.95	2.67	1.45	2.4	2.47	2.39	-3.52	0.0943	0.000302	Soluble	-3.17	0.209	0.000669	Soluble	-3.76	0.0547	0.000175	Soluble	High	Yes	Yes	No	Yes	No	Yes	Yes	-6.31	0	0	0	0	0	0.55	0	0	0	2.9
ZINC403609	O[C@@H](COc1nsnc1N1CCOCC1)CNC(C)(C)C	C13H24N4O3S	316.42	21	5	0.85	7	6	2	84.97	107.98	2.92	1.83	0.12	-0.36	1.77	1.26	-2.67	0.678	0.00214	Soluble	-3.72	0.0606	0.000192	Soluble	-2.38	1.33	0.00422	Soluble	High	No	Yes	No	No	No	No	No	-6.93	0	0	0	0	0	0.55	0	0	0	4.23
ZINC527386	Fc1ccc(cc1)[C@@H]1CCNC[C@H]1COc1ccc2c(c1)OCO2	C19H20FNO3	329.37	24	12	0.37	4	5	1	92.08	39.72	3.51	3.51	3.37	3.1	3.99	3.5	-4.2	0.0208	6.32e-05	Moderately soluble	-4.03	0.0309	9.38e-05	Moderately soluble	-6.04	0.000298	9.04e-07	Poorly soluble	High	Yes	Yes	No	Yes	No	Yes	Yes	-5.82	0	0	0	0	0	0.55	0	0	1	3.52
ZINC537752	CCN(CCN1C(=O)CN=C(c2c1ccc(c2)Cl)c1ccccc1F)CC	C21H23ClFN3O	387.88	27	12	0.33	6	4	0	114.84	35.91	3.89	3.02	3.66	3.34	5.2	3.82	-4.08	0.0322	8.31e-05	Moderately soluble	-3.44	0.141	0.000364	Soluble	-7.56	1.07e-05	2.75e-08	Poorly soluble	High	Yes	No	No	Yes	Yes	Yes	Yes	-6.52	0	0	0	0	0	0.55	0	0	1	3.62
ZINC537795	O/C(=N\S(=O)(=O)c1ccc(cc1)CCNC(=O)c1cnc(cn1)C)/NC1CCCCC1	C21H27N5O4S	445.54	31	12	0.43	9	7	3	117.17	142.02	2.79	2.44	3.36	1.43	2.15	2.43	-3.83	0.0656	0.000147	Soluble	-5.07	0.00383	8.6e-06	Moderately soluble	-6.18	0.000296	6.64e-07	Poorly soluble	Low	No	Yes	No	No	Yes	No	No	-7.29	0	0	1	1	0	0.55	0	2	2	3.57
ZINC537805	COc1ccc(cc1C(=O)NCCc1ccc(cc1)S(=O)(=O)/N=C(/NC1CCCCC1)\O)Cl	C23H28ClN3O5S	494	33	12	0.39	10	6	3	128.11	125.47	3	5.34	4.93	3.39	3.48	4.03	-5.88	0.000657	1.33e-06	Moderately soluble	-7.73	9.25e-06	1.87e-08	Poorly soluble	-7.23	2.92e-05	5.92e-08	Poorly soluble	Low	No	No	No	Yes	Yes	No	Yes	-5.52	0	1	0	0	1	0.55	0	2	3	3.61
ZINC537822	Fc1ccc(cc1)C(=O)CCCN1CCC(CC1)(O)c1ccc(cc1)Cl	C21H23ClFNO2	375.86	26	12	0.38	6	4	1	105.48	40.54	3.61	4.3	4.36	3.59	5.24	4.22	-4.82	0.00563	1.5e-05	Moderately soluble	-4.86	0.00513	1.37e-05	Moderately soluble	-7.05	3.33e-05	8.87e-08	Poorly soluble	High	Yes	No	Yes	Yes	No	Yes	Yes	-5.54	0	0	0	0	0	0.55	0	0	2	2.39
ZINC537891	CN1CCN(CC1)c1c(F)cc2c3c1OC[C@H](n3cc(c2=O)C(=O)O)C	C18H20FN3O4	361.37	26	10	0.44	2	6	1	101.83	75.01	2.49	-0.39	1.2	0.98	1.47	1.15	-1.99	3.72	0.0103	Very soluble	-0.72	68.6	0.19	Very soluble	-3.01	0.356	0.000986	Soluble	High	No	Yes	No	No	No	No	No	-8.78	0	0	0	0	0	0.55	0	0	1	3.63
ZINC537928	Clc1ccc(cc1)C1(O)CCN(CC1)CCC(C(=O)N(C)C)(c1ccccc1)c1ccccc1	C29H33ClN2O2	477.04	34	18	0.34	8	3	1	142.18	43.78	4.06	5.01	4.6	4.17	5.54	4.67	-5.82	0.000726	1.52e-06	Moderately soluble	-5.67	0.00102	2.14e-06	Moderately soluble	-8.95	5.35e-07	1.12e-09	Poorly soluble	High	Yes	Yes	Yes	Yes	No	Yes	Yes	-5.65	1	1	0	0	1	0.55	0	0	3	3.17
ZINC537931	CCOC(=O)N1CCC(=C2c3ccc(cc3CCc3c2nccc3)Cl)CC1	C22H23ClN2O2	382.88	27	12	0.36	3	3	0	111.66	42.43	3.82	5.2	4.51	3.72	4.9	4.43	-5.62	0.000917	2.39e-06	Moderately soluble	-5.84	0.000556	1.45e-06	Moderately soluble	-7.1	3.04e-05	7.94e-08	Poorly soluble	High	Yes	No	Yes	Yes	Yes	Yes	Yes	-4.94	0	0	0	0	1	0.55	0	0	2	3.56
ZINC537964	O[C@H](c1cc(nc2c1cccc2C(F)(F)F)C(F)(F)F)[C@H]1CCCCN1	C17H16F6N2O	378.31	26	10	0.47	4	9	2	86.51	45.15	2.88	3.62	6.05	3.43	4.8	4.15	-4.49	0.0123	3.26e-05	Moderately soluble	-4.26	0.021	5.55e-05	Moderately soluble	-6.1	0.000303	8.02e-07	Poorly soluble	High	No	Yes	No	No	No	Yes	Yes	-6.04	0	1	0	1	0	0.55	0	0	2	3.25
ZINC538065	CCc1nn(c(=O)n1CCOc1ccccc1)CCCN1CCN(CC1)c1cccc(c1)Cl	C25H32ClN5O2	470.01	33	17	0.44	10	4	0	140.01	55.53	4.7	4.31	2.79	3.54	3.53	3.77	-5.19	0.00303	6.45e-06	Moderately soluble	-5.19	0.00304	6.46e-06	Moderately soluble	-6.96	5.13e-05	1.09e-07	Poorly soluble	High	Yes	No	No	Yes	Yes	Yes	Yes	-6.11	0	1	0	0	0	0.55	0	0	3	3.87
ZINC538273	CN1CCN(CC1)c1c(F)cc2c3c1OC[C@@H](n3cc(c2=O)C(=O)O)C	C18H20FN3O4	361.37	26	10	0.44	2	6	1	101.83	75.01	2.25	-0.39	1.2	0.98	1.47	1.1	-1.99	3.72	0.0103	Very soluble	-0.72	68.6	0.19	Very soluble	-3.01	0.356	0.000986	Soluble	High	No	Yes	No	No	No	No	No	-8.78	0	0	0	0	0	0.55	0	0	1	3.63
ZINC538283	COC(=O)C1(CCN(CC1)CCC(=O)OC)N(c1ccccc1)C(=O)CC	C20H28N2O5	376.45	27	6	0.55	10	6	0	105.84	76.15	3.57	1.88	1.62	1.59	2.22	2.18	-2.86	0.516	0.00137	Soluble	-3.1	0.298	0.000792	Soluble	-4.09	0.0305	8.11e-05	Moderately soluble	High	No	No	No	No	No	No	No	-7.26	0	0	0	0	0	0.55	0	1	2	2.82
ZINC538386	COCC1(CCN(CC1)CCc1cccs1)N(c1ccccc1)C(=O)CC	C22H30N2O2S	386.55	27	11	0.5	9	3	0	117.1	61.02	4.16	3.95	3.83	2.81	4.9	3.93	-4.43	0.0143	3.69e-05	Moderately soluble	-4.93	0.00453	1.17e-05	Moderately soluble	-6.25	0.000218	5.64e-07	Poorly soluble	High	Yes	No	No	Yes	No	Yes	Yes	-5.85	0	0	0	0	0	0.55	0	0	3	3.05
ZINC538483	Clc1cccc(c1)N1CCN(CC1)CCCn1nc2n(c1=O)cccc2	C19H22ClN5O	371.86	26	15	0.37	5	3	0	111.12	45.78	3.62	2.84	1.6	3.37	1.72	2.63	-4.03	0.0346	9.3e-05	Moderately soluble	-3.46	0.129	0.000347	Soluble	-4.87	0.00503	1.35e-05	Moderately soluble	High	Yes	No	No	No	Yes	Yes	No	-6.55	0	0	0	0	0	0.55	0	0	1	2.93
ZINC538550	O=C1Nc2c(C1)cc(c(c2)Cl)CCN1CCN(CC1)c1nsc2c1cccc2	C21H21ClN4OS	412.94	28	15	0.33	4	3	1	125.48	76.71	3.5	4.02	2.48	3.27	4.85	3.62	-5.07	0.00355	8.61e-06	Moderately soluble	-5.33	0.00192	4.64e-06	Moderately soluble	-7.1	3.31e-05	8.02e-08	Poorly soluble	High	Yes	Yes	Yes	Yes	Yes	Yes	Yes	-5.96	0	0	0	0	0	0.55	0	0	2	3.17
ZINC538564	N#Cc1ccc(cc1C(F)(F)F)NC(=O)[C@](CS(=O)(=O)c1ccc(cc1)F)(O)C	C18H14F4N2O4S	430.37	29	12	0.22	7	9	2	93.86	115.64	1.69	2.31	5.34	2.47	3.22	3.01	-3.81	0.067	0.000156	Soluble	-4.38	0.0181	4.2e-05	Moderately soluble	-6.25	0.000241	5.6e-07	Poorly soluble	Low	No	Yes	No	Yes	No	No	Yes	-7.29	0	0	0	0	0	0.55	0	0	1	3.53
ZINC596881	Clc1ccc(cc1)CO[C@@H](c1ccc(cc1Cl)Cl)Cn1cncc1	C18H15Cl3N2O	381.68	24	17	0.17	6	2	0	98.19	27.05	3.11	5.3	5.33	3.82	5.24	4.56	-5.67	0.000809	2.12e-06	Moderately soluble	-5.62	0.000918	2.4e-06	Moderately soluble	-7.83	5.68e-06	1.49e-08	Poorly soluble	High	Yes	No	Yes	Yes	Yes	Yes	Yes	-4.87	0	0	0	0	1	0.55	0	0	2	3.13
ZINC601254	C[C@@H]1Nc2cc(Cl)c(cc2C(=O)N1c1ccccc1C)S(=O)(=O)N	C16H16ClN3O3S	365.83	24	12	0.19	2	4	2	99.59	100.88	1.5	2.78	2.84	1.72	1.41	2.05	-4.1	0.0292	7.99e-05	Moderately soluble	-4.55	0.0102	2.79e-05	Moderately soluble	-5.42	0.0014	3.82e-06	Moderately soluble	High	No	Yes	No	No	No	No	Yes	-6.56	0	0	0	0	0	0.55	0	0	1	3.28
ZINC601283	COc1ccc2c(c1)c(CC(=O)O)c(n2C(=O)c1ccc(cc1)Cl)C	C19H16ClNO4	357.79	25	15	0.16	5	4	1	96.12	68.53	2.76	4.27	3.93	3.3	3.91	3.63	-4.86	0.00491	1.37e-05	Moderately soluble	-5.42	0.00136	3.79e-06	Moderately soluble	-5.79	0.000583	1.63e-06	Moderately soluble	High	Yes	No	Yes	Yes	Yes	No	No	-5.45	0	0	0	0	0	0.85	0	0	2	2.51
ZINC601301	O=S1(=O)N[C@H](Cc2ccccc2)Nc2c1cc(c(c2)C(F)(F)F)S(=O)(=O)N	C15H14F3N3O4S2	421.41	27	12	0.2	4	9	3	96.86	135.12	1.27	1.19	3.99	1.27	0.78	1.7	-3.27	0.228	0.00054	Soluble	-3.62	0.1	0.000238	Soluble	-5.75	0.000758	1.8e-06	Moderately soluble	Low	No	Yes	No	No	No	No	No	-8.03	0	0	0	1	0	0.55	0	0	1	3.86
ZINC601316	O=C(C(c1ccccc1)(c1ccccc1)O)O[C@@H]1C[N+]2(C)CCC1CC2	C22H26NO3+	352.45	26	12	0.41	5	3	1	105.13	46.53	-0.24	3.28	2.22	-0.77	0.51	1	-4.1	0.0278	7.89e-05	Moderately soluble	-3.93	0.0412	0.000117	Soluble	-5.96	0.00039	1.11e-06	Moderately soluble	High	Yes	Yes	Yes	No	No	Yes	No	-6.12	0	0	0	0	0	0.55	0	1	1	4.56
ZINC601317	N#CC(c1ccccc1)(c1ccccc1)CCN1CCC(CC1)(C(=O)O)c1ccccc1	C28H28N2O2	424.53	32	18	0.29	7	4	1	129.63	64.33	3.1	2.71	4.62	3.85	5.24	3.9	-4.13	0.0312	7.35e-05	Moderately soluble	-3.71	0.082	0.000193	Soluble	-8.36	1.84e-06	4.35e-09	Poorly soluble	High	Yes	Yes	No	No	No	Yes	No	-6.97	0	0	0	0	0	0.55	0	0	1	2.85
ZINC606383	Clc1ccc(c(c1)Cl)[C@@H](Cn1ccnc1)OCc1csc2c1cccc2Cl	C20H15Cl3N2OS	437.77	27	20	0.15	6	2	0	113.57	55.29	3.67	6.32	6.54	4.38	6.9	5.56	-6.69	8.98e-05	2.05e-07	Poorly soluble	-7.27	2.35e-05	5.36e-08	Poorly soluble	-8.72	8.3e-07	1.9e-09	Poorly soluble	High	No	Yes	Yes	Yes	Yes	Yes	Yes	-4.48	1	1	0	1	1	0.55	0	0	2	3.74
ZINC607971	Clc1ccc(c(c1)Cl)CO[C@@H](c1ccc(cc1Cl)Cl)Cn1cncc1	C18H14Cl4N2O	416.13	25	17	0.17	6	2	0	103.2	27.05	3.52	5.93	5.98	4.31	5.88	5.12	-6.26	0.000227	5.46e-07	Poorly soluble	-6.27	0.000222	5.34e-07	Poorly soluble	-8.41	1.6e-06	3.85e-09	Poorly soluble	High	No	No	Yes	Yes	Yes	Yes	Yes	-4.63	1	1	0	1	1	0.55	0	0	2	3.13
ZINC608382	O=C(c1cccc2c1oc(c1ccccc1)c(c2=O)C)OCCN1CCCCC1	C24H25NO4	391.46	29	16	0.33	6	5	0	117.7	59.75	3.95	4.29	4.03	2.78	5.25	4.06	-4.98	0.00408	1.04e-05	Moderately soluble	-5.26	0.00216	5.52e-06	Moderately soluble	-7.67	8.43e-06	2.15e-08	Poorly soluble	High	Yes	No	Yes	Yes	Yes	Yes	Yes	-5.64	0	0	0	0	0	0.55	0	0	2	3.72
ZINC621893	COc1ccc(cc1)[C@@H]1Sc2ccccc2N(C(=O)[C@@H]1OC(=O)C)CCN(C)C	C22H26N2O4S	414.52	29	12	0.36	7	5	0	117.39	84.38	3.48	2.7	2.66	2.4	2.83	2.81	-3.96	0.046	0.000111	Soluble	-4.12	0.0311	7.5e-05	Moderately soluble	-5.65	0.000922	2.22e-06	Moderately soluble	High	No	No	No	Yes	Yes	Yes	Yes	-6.91	0	0	0	0	0	0.55	0	0	1	4.36
ZINC622123	COC1=CC(=O)C[C@H]([C@@]21Oc1c(C2=O)c(OC)cc(c1Cl)OC)C	C17H17ClO6	352.77	24	6	0.41	3	6	0	86.59	71.06	2.95	2.18	2.81	0.71	3.39	2.41	-3.39	0.145	0.00041	Soluble	-3.31	0.175	0.000495	Soluble	-4.71	0.00689	1.95e-05	Moderately soluble	High	Yes	No	Yes	No	Yes	No	Yes	-6.9	0	0	0	0	0	0.85	0	0	1	4.59
ZINC643055	Clc1ccc(cc1)CO[C@H](c1ccc(cc1Cl)Cl)Cn1cncc1	C18H15Cl3N2O	381.68	24	17	0.17	6	2	0	98.19	27.05	3.43	5.3	5.33	3.82	5.24	4.62	-5.67	0.000809	2.12e-06	Moderately soluble	-5.62	0.000918	2.4e-06	Moderately soluble	-7.83	5.68e-06	1.49e-08	Poorly soluble	High	Yes	No	Yes	Yes	Yes	Yes	Yes	-4.87	0	0	0	0	1	0.55	0	0	2	3.13
ZINC895042	N[C@H](C(=O)O)CS	C3H7NO2S	121.16	7	0	0.67	2	3	2	28.94	102.12	0.37	-2.49	-0.67	-3.06	-0.69	-1.31	1.11	1560	12.9	Highly soluble	0.89	936	7.73	Highly soluble	0.59	470	3.88	Soluble	High	No	No	No	No	No	No	No	-8.81	0	4	0	0	3	0.55	0	1	1	1.75
ZINC895081	OC(=O)C(CC(=O)O)(CC(=O)O)O	C6H8O7	192.12	13	0	0.5	5	7	4	37.47	132.13	-1.49	-1.72	-1.25	-1.48	-1.6	-1.51	0.38	463	2.41	Highly soluble	-0.54	55.3	0.288	Very soluble	1.71	9900	51.5	Soluble	Low	No	No	No	No	No	No	No	-8.69	0	2	0	1	1	0.56	0	0	1	2.18
ZINC895302	OCc1ccccc1	C7H8O	108.14	8	6	0.14	1	1	1	32.57	20.23	1.66	1.1	1.03	1.54	1.74	1.41	-1.69	2.2	0.0203	Very soluble	-1.12	8.25	0.0763	Very soluble	-2.16	0.746	0.0069	Soluble	High	Yes	No	Yes	No	No	No	No	-6.18	0	3	0	0	2	0.55	0	0	1	1
ZINC896409	OCCN(CCO)CCO	C6H15NO3	149.19	10	0	1	6	4	3	37.34	63.93	1.4	-1	-1.73	-1.13	-0.84	-0.66	0.26	272	1.82	Highly soluble	0.14	208	1.39	Highly soluble	0.1	187	1.26	Soluble	High	No	No	No	No	No	No	No	-7.92	0	3	0	0	1	0.55	0	0	1	1.02
ZINC896455	CN(CC[C@@H](c1ccccn1)c1ccc(cc1)Br)C	C16H19BrN2	319.24	19	12	0.31	5	2	0	83.51	16.13	3.29	3.45	3.93	3.16	4.04	3.57	-4.13	0.0237	7.41e-05	Moderately soluble	-3.47	0.108	0.000339	Soluble	-6.34	0.000145	4.55e-07	Poorly soluble	High	Yes	No	Yes	No	No	Yes	No	-5.8	0	0	0	0	0	0.55	0	0	0	2.77
ZINC896484	Clc1cccc(c1N=C1NCCN1)Cl	C9H9Cl2N3	230.09	14	6	0.22	1	1	2	66.6	36.42	1.84	1.98	1.41	2.51	3.08	2.17	-2.77	0.395	0.00172	Soluble	-2.37	0.98	0.00426	Soluble	-4.6	0.00573	2.49e-05	Moderately soluble	High	Yes	No	Yes	No	No	No	No	-6.3	0	0	0	0	0	0.55	0	1	1	2.68
ZINC896543	O=C(c1cc(OCC(F)(F)F)ccc1OCC(F)(F)F)NC[C@H]1CCCCN1	C17H20F6N2O3	414.34	28	6	0.59	10	10	2	91.06	59.59	3.24	3.78	5.58	2.29	4.15	3.81	-4.29	0.0213	5.14e-05	Moderately soluble	-4.73	0.0078	1.88e-05	Moderately soluble	-5.98	0.00043	1.04e-06	Moderately soluble	High	No	No	No	No	No	Yes	Yes	-6.14	0	0	0	0	0	0.55	0	0	3	3.01
ZINC896569	Clc1cc2NCNS(=O)(=O)c2cc1S(=O)(=O)N	C7H8ClN3O4S2	297.74	17	6	0.14	1	6	3	67.58	135.12	-0.19	-0.07	0.86	-0.86	-0.96	-0.24	-1.84	4.33	0.0146	Very soluble	-2.32	1.44	0.00483	Soluble	-2.87	0.401	0.00135	Soluble	High	No	No	No	No	No	No	No	-8.17	0	0	0	1	0	0.55	0	0	0	2.87
ZINC896634	Clc1ccc2c(c1)C(=N[C@@H](C(=O)N2C)O)c1ccccc1	C16H13ClN2O2	300.74	21	12	0.12	1	3	1	89.11	52.9	2.45	2.19	1.71	2.64	3.21	2.44	-3.44	0.109	0.000362	Soluble	-2.93	0.35	0.00116	Soluble	-5.19	0.00195	6.47e-06	Moderately soluble	High	Yes	No	No	No	No	No	No	-6.58	0	0	0	0	0	0.55	0	0	0	3.51
ZINC896663	N[C@H]1C[C@@H]1c1ccccc1	C9H11N	133.19	10	6	0.33	1	1	1	41.62	26.02	1.88	1.49	1.5	1.8	1.83	1.7	-1.98	1.39	0.0104	Very soluble	-1.64	3.02	0.0227	Very soluble	-2.37	0.564	0.00424	Soluble	High	Yes	No	No	No	No	No	No	-6.05	0	1	0	0	2	0.55	0	0	1	1.58
ZINC896666	N[C@H]1C[C@H]1c1ccccc1	C9H11N	133.19	10	6	0.33	1	1	1	41.62	26.02	1.97	1.49	1.5	1.8	1.83	1.72	-1.98	1.39	0.0104	Very soluble	-1.64	3.02	0.0227	Very soluble	-2.37	0.564	0.00424	Soluble	High	Yes	No	No	No	No	No	No	-6.05	0	1	0	0	2	0.55	0	0	1	1.58
ZINC896695	OCC(CO)(CO)N	C4H11NO3	121.14	8	0	1	3	4	4	27.57	86.71	0.68	-2.88	-2.34	-1.91	-1.5	-1.59	1.42	3200	26.4	Highly soluble	1.62	5010	41.3	Highly soluble	0.99	1180	9.73	Soluble	Low	No	No	No	No	No	No	No	-9.08	0	4	0	0	3	0.55	0	0	1	1
ZINC896711	COC(=O)[C@H](c1ccccc1)[C@H]1CCCCN1	C14H19NO2	233.31	17	6	0.5	4	3	1	70.94	38.33	2.73	0.2	1.7	2.12	2.63	1.88	-1.41	9.08	0.0389	Very soluble	-0.56	63.7	0.273	Very soluble	-3.74	0.0427	0.000183	Soluble	High	Yes	No	No	No	No	No	No	-7.58	0	0	0	0	0	0.55	0	0	1	2.78
ZINC896717	COc1cc(ccc1Cc1cn(c2c1cc(cc2)NC(=O)OC1CCCC1)C)/C(=N/S(=O)(=O)c1ccccc1C)/O	C31H33N3O6S	575.68	41	21	0.29	10	7	2	159.85	127.6	4.97	6.04	7.16	3.92	4.67	5.35	-6.93	6.71e-05	1.17e-07	Poorly soluble	-8.5	1.83e-06	3.17e-09	Poorly soluble	-8.87	7.75e-07	1.35e-09	Poorly soluble	Low	No	No	No	No	Yes	No	No	-5.52	1	4	0	1	1	0.55	0	2	3	4.36
ZINC896731	ON([C@@H](c1cc2c(s1)cccc2)C)C(=O)N	C11H12N2O2S	236.29	16	9	0.18	3	2	2	63.33	94.8	1.42	1.61	2.41	1.77	1.42	1.73	-2.54	0.685	0.0029	Soluble	-3.21	0.145	0.000613	Soluble	-2.14	1.73	0.00731	Soluble	High	No	No	No	No	No	No	No	-6.6	0	0	0	0	0	0.55	0	2	1	2.78
ZINC896740	Clc1ccc(c(c1)Cl)CO[C@H](c1ccc(cc1Cl)Cl)Cn1cncc1	C18H14Cl4N2O	416.13	25	17	0.17	6	2	0	103.2	27.05	3.56	5.93	5.98	4.31	5.88	5.13	-6.26	0.000227	5.46e-07	Poorly soluble	-6.27	0.000222	5.34e-07	Poorly soluble	-8.41	1.6e-06	3.85e-09	Poorly soluble	High	No	No	Yes	Yes	Yes	Yes	Yes	-4.63	1	1	0	1	1	0.55	0	0	2	3.13
ZINC896755	C[C@H]1Nc2cc(Cl)c(cc2C(=O)N1c1ccccc1C)S(=O)(=O)N	C16H16ClN3O3S	365.83	24	12	0.19	2	4	2	99.59	100.88	1.89	2.78	2.84	1.72	1.41	2.13	-4.1	0.0292	7.99e-05	Moderately soluble	-4.55	0.0102	2.79e-05	Moderately soluble	-5.42	0.0014	3.82e-06	Moderately soluble	High	No	Yes	No	No	No	Yes	Yes	-6.56	0	0	0	0	0	0.55	0	0	1	3.28
ZINC896958	O=C([C@@](c1ccccc1)(C1CCCC1)O)O[C@H]1CC[N+](C1)(C)C	C19H28NO3+	318.43	23	6	0.63	5	3	1	95.06	46.53	-0.96	3.06	1.97	-1.19	0.15	0.61	-3.61	0.0791	0.000248	Soluble	-3.7	0.063	0.000198	Soluble	-4.41	0.0125	3.93e-05	Moderately soluble	High	Yes	Yes	No	No	No	No	No	-6.07	0	0	0	0	0	0.55	0	1	0	3.7
ZINC897085	O[C@@H](c1cc(nc2c1cccc2C(F)(F)F)C(F)(F)F)[C@H]1CCCCN1	C17H16F6N2O	378.31	26	10	0.47	4	9	2	86.51	45.15	2.74	3.62	6.05	3.43	4.8	4.13	-4.49	0.0123	3.26e-05	Moderately soluble	-4.26	0.021	5.55e-05	Moderately soluble	-6.1	0.000303	8.02e-07	Poorly soluble	High	No	Yes	No	No	No	Yes	Yes	-6.04	0	1	0	1	0	0.55	0	0	2	3.25
ZINC897229	ClC[C@H]1Nc2cc(Cl)c(cc2S(=O)(=O)N1C)S(=O)(=O)N	C9H11Cl2N3O4S2	360.24	20	6	0.33	2	6	2	82.08	126.33	0.97	1.42	1.81	-0.35	-0.54	0.66	-3.06	0.315	0.000875	Soluble	-3.68	0.0757	0.00021	Soluble	-3.3	0.182	0.000506	Soluble	High	No	No	No	No	No	No	No	-7.49	0	0	0	0	0	0.55	0	1	1	3.65
ZINC897232	ClC[C@@H]1Nc2cc(Cl)c(cc2S(=O)(=O)N1C)S(=O)(=O)N	C9H11Cl2N3O4S2	360.24	20	6	0.33	2	6	2	82.08	126.33	1.4	1.42	1.81	-0.35	-0.54	0.75	-3.06	0.315	0.000875	Soluble	-3.68	0.0757	0.00021	Soluble	-3.3	0.182	0.000506	Soluble	High	No	No	No	No	No	No	No	-7.49	0	0	0	0	0	0.55	0	1	1	3.65
ZINC897244	OC(=O)[C@@H]1N2C(=O)C[C@H]2S(=O)(=O)C1(C)C	C8H11NO5S	233.24	15	0	0.75	1	5	1	54.13	100.13	0.52	-1.01	-0.1	-0.11	-0.94	-0.33	-0.58	60.8	0.261	Very soluble	-0.61	57.8	0.248	Very soluble	-0.1	187	0.804	Soluble	High	No	No	No	No	No	No	No	-8.44	0	0	0	0	0	0.56	0	0	1	3.84
ZINC897251	COc1cc2c(cc1OC)C[C@H](C2=O)CC1CCN(CC1)Cc1ccccc1	C24H29NO3	379.49	28	12	0.46	6	4	0	115.31	38.77	3.92	4.28	3.83	3.06	4.91	4	-4.81	0.00587	1.55e-05	Moderately soluble	-4.81	0.00592	1.56e-05	Moderately soluble	-6.9	4.78e-05	1.26e-07	Poorly soluble	High	Yes	Yes	No	No	No	Yes	Yes	-5.58	0	0	0	0	0	0.55	0	0	2	3.36
ZINC897256	O=CNc1cc(ccc1O)[C@H](CN[C@H](Cc1ccc(cc1)OC)C)O	C19H24N2O4	344.4	25	12	0.32	9	5	4	97.5	90.82	2.78	1.84	1.71	1.79	2.63	2.15	-2.9	0.438	0.00127	Soluble	-3.37	0.148	0.000429	Soluble	-5.2	0.00216	6.28e-06	Moderately soluble	High	No	Yes	No	No	No	Yes	No	-7.09	0	0	0	0	0	0.55	0	2	1	3.08
ZINC897258	O=CNc1cc(ccc1O)[C@@H](CN[C@@H](Cc1ccc(cc1)OC)C)O	C19H24N2O4	344.4	25	12	0.32	9	5	4	97.5	90.82	2.36	1.84	1.71	1.79	2.63	2.07	-2.9	0.438	0.00127	Soluble	-3.37	0.148	0.000429	Soluble	-5.2	0.00216	6.28e-06	Moderately soluble	High	No	Yes	No	No	No	Yes	No	-7.09	0	0	0	0	0	0.55	0	2	1	3.08
ZINC897291	CCN1C(=O)N[C@H](C1=O)c1ccccc1	C11H12N2O2	204.23	15	6	0.27	2	2	1	62.84	49.41	1.84	1.05	0.21	0.77	1.13	1	-1.93	2.39	0.0117	Very soluble	-1.68	4.28	0.021	Very soluble	-2.96	0.224	0.0011	Soluble	High	No	No	No	No	No	No	No	-6.8	0	0	0	0	0	0.55	0	1	1	2.09
ZINC897408	N#Cc1ccc(cc1C(F)(F)F)NC(=O)[C@@](CS(=O)(=O)c1ccc(cc1)F)(O)C	C18H14F4N2O4S	430.37	29	12	0.22	7	9	2	93.86	115.64	1.91	2.31	5.34	2.47	3.22	3.05	-3.81	0.067	0.000156	Soluble	-4.38	0.0181	4.2e-05	Moderately soluble	-6.25	0.000241	5.6e-07	Poorly soluble	Low	No	Yes	No	Yes	No	No	Yes	-7.29	0	0	0	0	0	0.55	0	0	1	3.53
ZINC901552	OC[C@@H](CS)S	C3H8OS2	124.23	6	0	1	2	1	1	33.55	97.83	1.13	0.19	0.21	0.29	0.56	0.48	-0.6	31.4	0.252	Very soluble	-1.8	1.96	0.0157	Very soluble	-0.34	56.8	0.457	Soluble	High	No	No	No	No	No	No	No	-6.92	0	3	0	0	2	0.55	0	1	1	2.23
ZINC967566	CC12CCC(CC1)C(O2)(C)C	C10H18O	154.25	11	0	1	0	1	0	47.12	9.23	2.58	2.74	2.74	2.45	2.86	2.67	-2.52	0.463	0.003	Soluble	-2.59	0.398	0.00258	Soluble	-2.45	0.545	0.00353	Soluble	High	Yes	No	No	No	No	No	No	-5.3	0	1	0	0	2	0.55	0	0	1	3.65
ZINC968255	CCCC(=O)Nc1ccc(c(c1)C(=O)C)OC[C@@H](CNC(C)C)O	C18H28N2O4	336.43	24	6	0.56	11	5	3	95.05	87.66	2.57	1.71	2.17	1.05	2.93	2.09	-2.46	1.16	0.00345	Soluble	-3.17	0.229	0.000682	Soluble	-4.8	0.00536	1.59e-05	Moderately soluble	High	No	Yes	No	No	No	No	No	-7.14	0	0	1	0	0	0.55	0	0	1	3.19
ZINC968263	CN(CCC=C1c2ccccc2C=Cc2c1cccc2)C	C20H21N	275.39	21	12	0.2	3	1	0	92.07	3.24	3.44	5.24	4.34	4.24	4.45	4.34	-5.07	0.00233	8.44e-06	Moderately soluble	-5.06	0.00242	8.77e-06	Moderately soluble	-6.22	0.000164	5.96e-07	Poorly soluble	High	Yes	No	No	No	No	Yes	No	-4.26	1	0	0	0	2	0.55	0	1	1	3.5
ZINC968275	CN(C[C@H](CN1c2ccccc2CCc2c1cccc2)C)C	C20H26N2	294.43	22	12	0.4	4	1	0	98.57	6.48	3.45	5.8	3.74	4	3.85	4.17	-5.46	0.00102	3.47e-06	Moderately soluble	-5.71	0.000579	1.97e-06	Moderately soluble	-6.15	0.000209	7.1e-07	Poorly soluble	High	Yes	No	Yes	No	No	Yes	No	-3.98	0	0	0	0	1	0.55	0	0	1	3.55
ZINC968305	CN([C@H](Cc1ccccc1)C)Cc1ccccc1	C17H21N	239.36	18	12	0.29	5	1	0	78.02	3.24	3.18	4.28	3.6	4.09	3.93	3.82	-4.18	0.0157	6.55e-05	Moderately soluble	-4.06	0.0208	8.7e-05	Moderately soluble	-5.89	0.000309	1.29e-06	Moderately soluble	High	Yes	No	No	No	No	Yes	No	-4.72	0	0	0	0	1	0.55	0	0	2	1.9
ZINC968328	O=C1NC(=O)[C@@H](S1)Cc1ccc(cc1)OCCN(c1ccccn1)C	C18H19N3O3S	357.43	25	12	0.28	7	4	1	101.63	96.83	2.41	3.11	2.11	1.64	2.54	2.36	-3.91	0.0441	0.000123	Soluble	-4.81	0.00551	1.54e-05	Moderately soluble	-5.71	0.000689	1.93e-06	Moderately soluble	High	No	No	No	Yes	Yes	Yes	Yes	-6.27	0	0	0	0	0	0.55	0	1	1	3.35
ZINC968330	O=C1NC(=O)[C@H](S1)Cc1ccc(cc1)OCCN(c1ccccn1)C	C18H19N3O3S	357.43	25	12	0.28	7	4	1	101.63	96.83	2.17	3.11	2.11	1.64	2.54	2.31	-3.91	0.0441	0.000123	Soluble	-4.81	0.00551	1.54e-05	Moderately soluble	-5.71	0.000689	1.93e-06	Moderately soluble	High	No	No	No	Yes	Yes	Yes	Yes	-6.27	0	0	0	0	0	0.55	0	1	1	3.35
ZINC968336	Cc1ccc(c(c1)[C@@H](c1ccccc1)CCN(C(C)C)C(C)C)O	C22H31NO	325.49	24	12	0.45	7	2	1	104.24	23.47	3.65	5.64	5.34	4.57	5.2	4.88	-5.32	0.00156	4.79e-06	Moderately soluble	-5.9	0.000413	1.27e-06	Moderately soluble	-6.54	9.32e-05	2.86e-07	Poorly soluble	High	Yes	Yes	No	No	No	Yes	No	-4.28	1	0	0	0	1	0.55	0	0	1	2.96
ZINC968345	CC[C@@H](C1(CC)C(=O)NC(=O)NC1=O)C	C10H16N2O3	212.25	15	0	0.7	3	3	2	62.23	75.27	1.4	1.65	0.03	0.64	1.33	1.01	-2	2.14	0.0101	Very soluble	-2.84	0.304	0.00143	Soluble	-2.77	0.356	0.00168	Soluble	High	No	No	No	No	No	No	No	-6.42	0	0	0	0	0	0.55	0	1	1	2.4
ZINC1035331	OC[C@H]1O[C@H]([C@@H]([C@@H]1O)O)n1cnc(n1)C(=O)N	C8H12N4O5	244.2	17	5	0.62	3	7	4	51.06	143.72	0.35	-1.85	-3.34	-2.94	-2.9	-2.14	-0.21	151	0.619	Very soluble	-0.65	54.7	0.224	Very soluble	1.76	14000	57.3	Soluble	Low	No	No	No	No	No	No	No	-9.1	0	1	1	1	0	0.55	0	0	1	3.89
ZINC1187543	Cn1cc[nH]c1=S	C4H6N2S	114.17	7	5	0.25	0	0	1	30.88	52.81	1.48	-0.34	1.08	-0.56	2.06	0.74	-0.86	15.7	0.137	Very soluble	-0.31	56.3	0.493	Very soluble	-0.85	16.1	0.141	Soluble	High	Yes	No	No	No	No	No	No	-7.24	0	3	0	0	2	0.55	0	1	1	1.32
ZINC1481815	OC(=O)c1ccc(cc1)n1nc(nc1c1ccccc1O)c1ccccc1O	C21H15N3O4	373.36	28	23	0	4	6	3	103.24	108.47	2.58	3.8	3.71	2.81	2.42	3.07	-4.89	0.00478	1.28e-05	Moderately soluble	-5.77	0.000631	1.69e-06	Moderately soluble	-5.76	0.000655	1.75e-06	Moderately soluble	High	No	No	No	No	No	No	No	-5.88	0	0	0	0	0	0.56	0	0	2	2.95
ZINC1481910	CN[C@H](CC1CCCCC1)C	C10H21N	155.28	11	0	1	3	1	1	50.87	12.03	2.83	3.47	2.56	2.45	2.45	2.75	-2.79	0.251	0.00162	Soluble	-3.4	0.0612	0.000394	Soluble	-2.58	0.407	0.00262	Soluble	High	Yes	No	No	No	No	No	No	-4.78	0	1	0	0	2	0.55	0	0	1	1.83
ZINC1481956	Fc1ccc2c(c1)onc2C1CCN(CC1)CCc1c(C)nc2n(c1=O)CCC[C@H]2O	C23H27FN4O3	426.48	31	15	0.52	4	7	1	118.87	84.39	3.86	2.17	2.8	2.39	3.58	2.96	-3.95	0.0484	0.000113	Soluble	-3.58	0.113	0.000266	Soluble	-5.94	0.00049	1.15e-06	Moderately soluble	High	No	Yes	No	No	No	Yes	Yes	-7.36	0	0	0	0	0	0.55	0	0	1	4.6
ZINC1482113	OC(=O)CC[C@@H](C(=O)O)N	C5H9NO4	147.13	10	0	0.6	4	5	3	32.4	100.62	0.4	-3.69	-0.74	-3.18	-1.19	-1.68	1.84	10100	68.6	Highly soluble	2.16	21500	146	Highly soluble	0.89	1150	7.83	Soluble	High	No	No	No	No	No	No	No	-9.82	0	4	0	0	2	0.56	0	0	1	1.81
ZINC1482184	NC(=O)c1ncn2c1nnn(c2=O)C	C6H6N6O2	194.15	14	9	0.17	1	5	1	44.4	108.17	1.29	-1.06	-2.08	-0.57	-1.78	-0.84	-0.79	31.8	0.164	Very soluble	-0.72	36.8	0.189	Very soluble	-0.03	181	0.931	Soluble	High	No	No	No	No	No	No	No	-8.24	0	1	0	0	1	0.55	0	0	1	2.35
ZINC1482197	N[C@@H]1C[C@H]1c1ccccc1	C9H11N	133.19	10	6	0.33	1	1	1	41.62	26.02	1.85	1.49	1.5	1.8	1.83	1.69	-1.98	1.39	0.0104	Very soluble	-1.64	3.02	0.0227	Very soluble	-2.37	0.564	0.00424	Soluble	High	Yes	No	No	No	No	No	No	-6.05	0	1	0	0	2	0.55	0	0	1	1.58
ZINC1489478	N[C@H](Cc1cc(F)c(cc1F)F)CC(=O)N1CCn2c(C1)nnc2C(F)(F)F	C16H15F6N5O	407.31	28	11	0.44	6	10	1	87.25	77.04	2.35	0.7	3.9	2.52	3.08	2.51	-2.7	0.811	0.00199	Soluble	-1.9	5.18	0.0127	Very soluble	-4.81	0.00632	1.55e-05	Moderately soluble	High	Yes	Yes	No	No	No	No	No	-8.29	0	0	0	0	0	0.55	0	1	1	3.5
ZINC1529323	OC(=O)CC[C@@H](C(=O)O)NC(=O)c1ccc(cc1)N(Cc1cnc2c(n1)c(N)nc(n2)N)C	C20H22N8O5	454.44	33	16	0.25	10	9	5	118.4	210.54	1.53	-1.85	0.13	-0.73	-0.66	-0.32	-1.19	29.3	0.0644	Very soluble	-2.05	4.02	0.00886	Soluble	-3.99	0.0467	0.000103	Soluble	Low	No	Yes	No	No	No	No	No	-10.39	1	0	1	1	1	0.11	0	0	2	3.58
ZINC1530283	OC(=O)CC[C@@H](C(=O)O)NC(=O)N	C6H10N2O5	190.15	13	0	0.5	6	5	4	40.6	129.72	-0.17	-2.39	-1.03	-1.07	-1.85	-1.3	0.88	1450	7.63	Highly soluble	0.2	305	1.6	Highly soluble	0.87	1410	7.41	Soluble	High	No	No	No	No	No	No	No	-9.16	0	1	0	0	2	0.56	0	0	1	2.13
ZINC1530567	O[C@H](COc1ccc(cc1)CCOCC1CC1)CNC(C)C	C18H29NO3	307.43	22	6	0.67	11	4	2	88.9	50.72	3.85	2.81	2.33	1.8	3.69	2.9	-2.99	0.313	0.00102	Soluble	-3.53	0.0903	0.000294	Soluble	-4.83	0.0045	1.46e-05	Moderately soluble	High	Yes	No	No	No	No	Yes	No	-6.18	0	0	1	0	0	0.55	0	0	1	3.14
ZINC1530568	O[C@@H](COc1ccc(cc1)CCOCC1CC1)CNC(C)C	C18H29NO3	307.43	22	6	0.67	11	4	2	88.9	50.72	3.85	2.81	2.33	1.8	3.69	2.9	-2.99	0.313	0.00102	Soluble	-3.53	0.0903	0.000294	Soluble	-4.83	0.0045	1.46e-05	Moderately soluble	High	Yes	No	No	No	No	Yes	No	-6.18	0	0	1	0	0	0.55	0	0	1	3.14
ZINC1530570	O[C@@H](COc1ccc(cc1)COCCOC(C)C)CNC(C)C	C18H31NO4	325.44	23	6	0.67	12	5	2	92.1	59.95	4	1.87	2.21	1.37	3.37	2.56	-2.44	1.19	0.00366	Soluble	-2.75	0.578	0.00178	Soluble	-4.79	0.00528	1.62e-05	Moderately soluble	High	Yes	Yes	No	No	No	Yes	No	-6.96	0	0	1	0	0	0.55	0	0	1	3.23
ZINC1530571	O=C1CC2(CCCC2)CC(=O)N1CCCCN1CCN(CC1)c1ncccn1	C21H31N5O2	385.5	28	6	0.71	6	5	0	118.7	69.64	3.44	2.63	0.95	1.9	2.2	2.22	-3.65	0.0864	0.000224	Soluble	-3.74	0.0697	0.000181	Soluble	-4.59	0.00998	2.59e-05	Moderately soluble	High	No	Yes	No	No	No	Yes	Yes	-6.78	0	0	0	0	0	0.55	0	1	1	3.46
ZINC1530579	COc1ccccc1OCCNC[C@@H](COc1cccc2c1c1ccccc1[nH]2)O	C24H26N2O4	406.47	30	19	0.25	10	5	3	117.99	75.74	2.9	4.37	3.74	1.96	4.55	3.5	-4.92	0.00487	1.2e-05	Moderately soluble	-5.68	0.000856	2.11e-06	Moderately soluble	-8.14	2.91e-06	7.16e-09	Poorly soluble	High	Yes	Yes	Yes	Yes	Yes	Yes	Yes	-5.68	0	0	0	0	0	0.55	0	0	3	3.34
ZINC1530617	CC(N(C(C)C)CC[C@](c1ccccn1)(c1ccccc1)C(=O)N)C	C21H29N3O	339.47	25	12	0.43	8	3	1	102.64	59.22	2.76	2.58	3.36	2.29	3.53	2.9	-3.4	0.136	0.000401	Soluble	-3.47	0.114	0.000337	Soluble	-5.94	0.000391	1.15e-06	Moderately soluble	High	Yes	Yes	No	No	No	Yes	Yes	-6.54	0	0	0	0	0	0.55	0	0	1	3.39
ZINC1530621	CCN[C@H]1C[C@H](C)S(=O)(=O)c2c1cc(s2)S(=O)(=O)N	C10H16N2O4S3	324.44	19	5	0.6	3	6	2	73.29	151.33	1.02	0.41	2.45	-0.34	0.48	0.8	-2.11	2.54	0.00782	Soluble	-3.15	0.227	0.000701	Soluble	-2.73	0.597	0.00184	Soluble	Low	No	No	No	No	No	No	No	-7.99	0	0	1	1	1	0.55	0	0	0	4.21
ZINC1530625	CCCCCc1cc(O)c2c(c1)OC([C@H]1[C@H]2C=C(C)CC1)(C)C	C21H30O2	314.46	23	6	0.62	4	2	1	97.91	29.46	4.15	6.97	5.74	4.39	5.41	5.33	-6.11	0.000244	7.77e-07	Poorly soluble	-7.4	1.24e-05	3.96e-08	Poorly soluble	-5.93	0.000369	1.17e-06	Moderately soluble	High	Yes	No	No	Yes	Yes	Yes	No	-3.27	1	1	0	0	1	0.55	0	1	1	4.27
ZINC1530635	CC(=O)OCC(CCn1cnc2c1nc(N)nc2)COC(=O)C	C14H19N5O4	321.33	23	9	0.5	9	7	1	82.02	122.22	2.5	-0.06	0.55	-0.15	0.53	0.68	-1.49	10.4	0.0324	Very soluble	-2.06	2.83	0.0088	Soluble	-2.78	0.532	0.00166	Soluble	High	No	Yes	No	No	No	No	No	-8.3	0	0	0	0	0	0.55	0	1	1	2.43
ZINC1530638	CNCC[C@H](c1ccccc1)Oc1ccc(cc1)C(F)(F)F	C17H18F3NO	309.33	22	12	0.29	7	5	1	79.65	21.26	3.21	4.23	5.26	4.05	4.58	4.27	-4.36	0.0134	4.32e-05	Moderately soluble	-4.39	0.0127	4.1e-05	Moderately soluble	-6.82	4.65e-05	1.5e-07	Poorly soluble	High	Yes	No	Yes	Yes	No	Yes	Yes	-5.18	0	0	0	0	0	0.55	0	0	1	2.56
ZINC1530641	Cc1ccc(c(c1)OCCCC(C(=O)O)(C)C)C	C15H22O3	250.33	18	6	0.53	6	3	1	73.22	46.53	2.74	3.76	3.57	3.04	3.65	3.35	-3.61	0.0612	0.000245	Soluble	-4.43	0.0093	3.71e-05	Moderately soluble	-4.33	0.0117	4.69e-05	Moderately soluble	High	Yes	No	No	No	No	Yes	No	-5.16	0	0	0	0	0	0.85	0	0	1	2.08
ZINC1530654	OCCN(CCC[C@@H](Nc1ccnc2c1ccc(c2)Cl)C)CC	C18H26ClN3O	335.87	23	10	0.5	9	3	2	98.57	48.39	3.58	3.58	3.59	2.35	3.73	3.37	-3.91	0.0417	0.000124	Soluble	-4.28	0.0175	5.22e-05	Moderately soluble	-6.35	0.00015	4.46e-07	Poorly soluble	High	Yes	No	Yes	No	No	Yes	No	-5.81	0	0	0	0	0	0.55	0	0	2	2.82
ZINC1530660	ClCCN[P@@]1(=O)OCCCN1CCCl	C7H15Cl2N2O2P	261.09	14	0	1	5	4	1	62.6	51.38	2.33	0.86	1.5	0.97	1.13	1.36	-1.67	5.58	0.0214	Very soluble	-1.52	7.84	0.03	Very soluble	-2.71	0.508	0.00195	Soluble	High	Yes	No	No	No	No	No	No	-7.28	0	0	0	0	0	0.55	0	2	0	4.07
ZINC1530688	CNCCCC12CCC(c3c1cccc3)c1c2cccc1	C20H23N	277.4	21	12	0.4	4	1	1	88.32	12.03	3.28	4.58	4.21	4.39	5.06	4.31	-4.6	0.0069	2.49e-05	Moderately soluble	-4.56	0.0077	2.78e-05	Moderately soluble	-7.42	1.04e-05	3.76e-08	Poorly soluble	High	Yes	Yes	No	No	No	Yes	No	-4.74	1	0	0	0	1	0.55	0	0	1	3.34
ZINC1530694	CCOc1ccccc1OCCN[C@@H](Cc1ccc(c(c1)S(=O)(=O)N)OC)C	C20H28N2O5S	408.51	28	12	0.4	11	7	2	108.24	108.26	3.09	2.73	3.42	1.41	2.6	2.65	-3.68	0.0846	0.000207	Soluble	-4.66	0.00899	2.2e-05	Moderately soluble	-6.5	0.00013	3.18e-07	Poorly soluble	High	No	Yes	No	Yes	Yes	Yes	Yes	-6.85	0	0	1	0	0	0.55	0	0	2	3.62
ZINC1530695	CSc1ccc2c(c1)N(CC[C@@H]1CCCCN1C)c1c(S2)cccc1	C21H26N2S2	370.57	25	12	0.43	4	1	0	118.01	57.08	4.03	5.9	5.12	5.03	4.56	4.93	-5.95	0.00042	1.13e-06	Moderately soluble	-6.87	4.97e-05	1.34e-07	Poorly soluble	-6.49	0.00012	3.25e-07	Poorly soluble	High	Yes	Yes	Yes	No	Yes	Yes	No	-4.37	1	0	0	0	1	0.55	0	0	2	4.06
ZINC1530697	CSc1ccc2c(c1)N(CC[C@H]1CCCCN1C)c1c(S2)cccc1	C21H26N2S2	370.57	25	12	0.43	4	1	0	118.01	57.08	3.86	5.9	5.12	5.03	4.56	4.9	-5.95	0.00042	1.13e-06	Moderately soluble	-6.87	4.97e-05	1.34e-07	Poorly soluble	-6.49	0.00012	3.25e-07	Poorly soluble	High	Yes	Yes	Yes	No	Yes	Yes	Yes	-4.37	1	0	0	0	1	0.55	0	0	2	4.06
ZINC1530706	CCC(=O)C(c1ccccc1)(c1ccccc1)C[C@H](N(C)C)C	C21H27NO	309.45	23	12	0.38	7	2	0	97.33	20.31	3.42	3.93	4.29	4	4.71	4.07	-4.16	0.0215	6.94e-05	Moderately soluble	-4.06	0.0272	8.79e-05	Moderately soluble	-6.64	7.11e-05	2.3e-07	Poorly soluble	High	Yes	Yes	No	No	No	Yes	Yes	-5.4	0	0	0	0	0	0.55	0	0	1	2.79
ZINC1530707	CCC(=O)C(c1ccccc1)(c1ccccc1)C[C@@H](N(C)C)C	C21H27NO	309.45	23	12	0.38	7	2	0	97.33	20.31	3.39	3.93	4.29	4	4.71	4.06	-4.16	0.0215	6.94e-05	Moderately soluble	-4.06	0.0272	8.79e-05	Moderately soluble	-6.64	7.11e-05	2.3e-07	Poorly soluble	High	Yes	Yes	No	No	No	Yes	Yes	-5.4	0	0	0	0	0	0.55	0	0	1	2.79
ZINC1530710	O=C1OC(C(=O)N1C)(C)C	C6H9NO3	143.14	10	0	0.67	0	3	0	37.56	46.61	1.64	0.3	-0.01	-0.55	0.37	0.35	-0.92	17.3	0.121	Very soluble	-0.84	20.6	0.144	Very soluble	-0.69	29.2	0.204	Soluble	High	No	No	No	No	No	No	No	-6.96	0	3	0	0	1	0.55	0	0	1	1.71
ZINC1530716	CCN(CCNC(=O)c1cc(Cl)c(cc1OC)N)CC	C14H22ClN3O2	299.8	20	6	0.5	8	3	2	82.28	67.59	3.17	2.62	2.01	1.75	2.05	2.32	-3.04	0.271	0.000905	Soluble	-3.69	0.0613	0.000204	Soluble	-4.5	0.00944	3.15e-05	Moderately soluble	High	Yes	No	Yes	No	No	Yes	No	-6.27	0	0	0	0	0	0.55	0	1	1	2.27
ZINC1530736	CN/C(=C\[N+](=O)[O-])/NCCSCc1csc(n1)CN(C)C	C12H21N5O2S2	331.46	21	5	0.58	10	4	2	89.42	139.55	2.96	1.59	1.02	-0.87	0.27	0.99	-2.41	1.28	0.00386	Soluble	-4.13	0.0245	7.38e-05	Moderately soluble	-3.07	0.283	0.000855	Soluble	High	No	Yes	No	No	No	No	No	-7.19	0	0	0	1	0	0.55	0	2	1	3.68
ZINC1530751	CCN(CC#CCOC(=O)[C@@](c1ccccc1)(C1CCCCC1)O)CC	C22H31NO3	357.49	26	6	0.59	8	4	1	104.79	49.77	4.15	4.18	3.31	3.07	4	3.74	-4.33	0.0166	4.65e-05	Moderately soluble	-4.93	0.00416	1.16e-05	Moderately soluble	-4.76	0.00614	1.72e-05	Moderately soluble	High	Yes	No	No	No	No	Yes	No	-5.51	0	0	0	0	0	0.55	0	1	3	4.15
ZINC1530752	CCN(CC#CCOC(=O)[C@](c1ccccc1)(C1CCCCC1)O)CC	C22H31NO3	357.49	26	6	0.59	8	4	1	104.79	49.77	3.58	4.18	3.31	3.07	4	3.63	-4.33	0.0166	4.65e-05	Moderately soluble	-4.93	0.00416	1.16e-05	Moderately soluble	-4.76	0.00614	1.72e-05	Moderately soluble	High	Yes	No	No	No	No	Yes	No	-5.51	0	0	0	0	0	0.55	0	1	3	4.15
ZINC1530756	CCN(CCNC(=O)c1ccc(cc1)N)CC	C13H21N3O	235.33	17	6	0.46	7	2	2	70.77	58.36	2.39	0.88	1.35	1.53	1.29	1.49	-1.65	5.24	0.0223	Very soluble	-1.69	4.81	0.0204	Very soluble	-3.78	0.0394	0.000167	Soluble	High	Yes	No	No	No	No	No	No	-7.11	0	0	0	0	0	0.55	0	1	1	1.45
ZINC1530759	CCCNC[C@@H](COc1ccccc1C(=O)CCc1ccccc1)O	C21H27NO3	341.44	25	12	0.38	11	4	2	100.42	58.56	3.3	3.31	3.24	2.54	4.55	3.39	-3.67	0.0728	0.000213	Soluble	-4.22	0.0208	6.08e-05	Moderately soluble	-6.91	4.19e-05	1.23e-07	Poorly soluble	High	Yes	Yes	Yes	No	No	Yes	Yes	-6.03	0	0	1	0	0	0.55	0	0	1	3.27
ZINC1530761	O=C(C1c2ccccc2Oc2c1cccc2)OCC[N+](C(C)C)(C(C)C)C	C23H30NO3+	368.49	27	12	0.43	7	3	0	107.7	35.53	0.16	4.21	4.73	-0.02	1.83	2.18	-4.64	0.00837	2.27e-05	Moderately soluble	-4.67	0.00795	2.16e-05	Moderately soluble	-7.23	2.16e-05	5.87e-08	Poorly soluble	High	Yes	Yes	No	No	No	Yes	Yes	-5.56	0	0	0	0	0	0.55	0	1	2	3.62
ZINC1530764	CNCCCC1c2ccccc2C=Cc2c1cccc2	C19H21N	263.38	20	12	0.26	4	1	1	86.85	12.03	3.26	4.41	4.08	4.09	4.42	4.05	-4.43	0.00976	3.7e-05	Moderately soluble	-4.38	0.011	4.17e-05	Moderately soluble	-6.7	5.24e-05	1.99e-07	Poorly soluble	High	Yes	No	No	No	No	Yes	No	-4.78	0	0	0	0	1	0.55	0	1	1	3.57
ZINC1530776	CC(=O)CCCCn1c(=O)c2n(C)cnc2n(c1=O)C	C13H18N4O3	278.31	20	9	0.54	5	4	0	76.27	78.89	2.49	0.29	0.19	-0.01	0.83	0.76	-1.75	4.94	0.0177	Very soluble	-1.51	8.62	0.031	Very soluble	-2.23	1.63	0.00586	Soluble	High	No	No	No	No	No	No	No	-7.79	0	0	0	0	0	0.55	0	0	0	2.44
ZINC1530788	OC(COc1cccc2c1c(=O)cc(o2)C(=O)O)COc1cccc2c1c(=O)cc(o2)C(=O)O	C23H16O11	468.37	34	20	0.13	8	11	3	115.73	173.71	1.8	1.92	2.11	-0.84	2.81	1.56	-3.86	0.0645	0.000138	Soluble	-5.19	0.00301	6.43e-06	Moderately soluble	-5.71	0.000913	1.95e-06	Moderately soluble	Low	No	No	No	No	Yes	No	No	-7.79	1	0	1	1	2	0.11	0	0	2	3.63
ZINC1530803	NC(=O)OCC(c1ccccc1)COC(=O)N	C11H14N2O4	238.24	17	6	0.27	7	4	2	59.4	104.64	1.71	0.61	0.96	0.74	0.04	0.81	-1.5	7.52	0.0316	Very soluble	-2.38	0.989	0.00415	Soluble	-1.92	2.84	0.0119	Soluble	High	No	No	No	No	No	No	No	-7.32	0	0	0	0	0	0.55	0	1	1	1.99
ZINC1530805	C[C@]1(CC)CC(=O)NC1=O	C7H11NO2	141.17	10	0	0.71	1	2	1	40.51	46.17	1.22	0.38	0.07	0.65	1.36	0.74	-0.89	18.2	0.129	Very soluble	-0.92	17.2	0.122	Very soluble	-1.96	1.55	0.011	Soluble	High	No	No	No	No	No	No	No	-6.89	0	1	0	0	1	0.55	0	1	1	1.43
ZINC1530810	FCOC(C(F)(F)F)C(F)(F)F	C4H3F7O	200.05	12	0	1	4	8	0	22.86	9.23	1.61	2.81	5.36	2.06	2.87	2.94	-2.59	0.518	0.00259	Soluble	-2.66	0.437	0.00218	Soluble	-2.13	1.48	0.0074	Soluble	High	No	No	No	No	No	No	No	-5.53	0	2	0	0	2	0.55	0	0	1	1.57
ZINC1530814	CCCCN1CCCC[C@@H]1C(=O)Nc1c(C)cccc1C	C18H28N2O	288.43	21	6	0.61	6	2	1	93.84	32.34	3.47	3.41	3.32	2.97	3.81	3.4	-3.59	0.0738	0.000256	Soluble	-3.77	0.0491	0.00017	Soluble	-5.26	0.00158	5.47e-06	Moderately soluble	High	Yes	No	No	No	No	Yes	No	-5.64	0	0	0	0	0	0.55	0	0	0	2.72
ZINC1530820	O=C(OCC[N+](C)(C)C)CCC(=O)OCC[N+](C)(C)C	C14H30N2O4++	290.4	20	0	0.86	11	4	0	76.73	52.6	-6.95	0.57	0.27	-6.35	-4.12	-3.32	-1.27	15.5	0.0533	Very soluble	-1.25	16.4	0.0566	Very soluble	-4.12	0.0223	7.67e-05	Moderately soluble	High	No	Yes	No	No	No	No	No	-7.67	0	0	1	0	0	0.55	0	2	1	2.86
ZINC1530862	NCCC[C@@H](Nc1cc(OC)cc2c1nccc2)C	C15H21N3O	259.35	19	10	0.4	6	3	2	79.48	60.17	2.77	2.23	2.59	1.39	2.55	2.31	-2.85	0.369	0.00142	Soluble	-3.13	0.193	0.000743	Soluble	-5.17	0.00174	6.7e-06	Moderately soluble	High	Yes	Yes	Yes	No	No	Yes	No	-6.3	0	0	0	0	0	0.55	0	0	0	2.68
ZINC1530863	NCCC[C@H](Nc1cc(OC)cc2c1nccc2)C	C15H21N3O	259.35	19	10	0.4	6	3	2	79.48	60.17	2.5	2.23	2.59	1.39	2.55	2.25	-2.85	0.369	0.00142	Soluble	-3.13	0.193	0.000743	Soluble	-5.17	0.00174	6.7e-06	Moderately soluble	High	Yes	Yes	Yes	No	No	Yes	No	-6.3	0	0	0	0	0	0.55	0	0	0	2.68
ZINC1530922	O=C1N(COP(=O)(O)O)C(=O)NC1(c1ccccc1)c1ccccc1	C16H15N2O6P	362.27	25	12	0.12	5	6	3	94.47	125.98	1.16	0.56	0.68	0.99	0.46	0.77	-2.46	1.24	0.00343	Soluble	-2.78	0.604	0.00167	Soluble	-3.86	0.0495	0.000137	Soluble	High	No	Yes	No	No	No	No	No	-8.11	0	0	0	0	0	0.56	0	2	1	2.92
ZINC1530929	CCC#C[C@@H]([C@@]1(CC=C)C(=O)NC(=O)N(C1=O)C)C	C14H18N2O3	262.3	19	0	0.5	3	3	1	79.24	66.48	2.44	2.29	0.62	1.57	2.1	1.8	-2.71	0.51	0.00195	Soluble	-3.32	0.125	0.000475	Soluble	-2.58	0.684	0.00261	Soluble	High	No	No	No	No	Yes	No	No	-6.27	0	0	0	0	0	0.55	0	3	0	3.74
ZINC1530935	COCCCOc1ccnc(c1C)C[S@](=O)c1nc2c([nH]1)cccc2	C18H21N3O3S	359.44	25	15	0.33	8	5	1	97.75	96.31	1.96	2.1	3.7	0.88	3.29	2.39	-3.31	0.177	0.000493	Soluble	-3.75	0.0635	0.000177	Soluble	-6.9	4.5e-05	1.25e-07	Poorly soluble	High	No	Yes	Yes	Yes	Yes	Yes	Yes	-7	0	0	0	0	0	0.55	0	0	2	3.7
ZINC1530939	CCCCOc1nc2ccccc2c(c1)C(=O)NCCN(CC)CC	C20H29N3O2	343.46	25	10	0.5	11	4	1	102.58	54.46	3.9	4.4	3.49	2.48	3.89	3.63	-4.31	0.0168	4.88e-05	Moderately soluble	-5.26	0.00188	5.49e-06	Moderately soluble	-6.74	6.28e-05	1.83e-07	Poorly soluble	High	Yes	No	Yes	No	No	Yes	Yes	-5.27	0	0	1	0	0	0.55	0	0	2	2.91
ZINC1530947	O=C1CC[C@@H](C(=O)N1)N1C(=O)c2c(C1=O)cccc2	C13H10N2O4	258.23	19	6	0.23	1	4	1	70.95	83.55	1.28	0.33	-0.67	0.87	1.02	0.57	-1.82	3.94	0.0153	Very soluble	-1.65	5.81	0.0225	Very soluble	-3.05	0.229	0.000885	Soluble	High	No	No	No	No	No	No	No	-7.64	0	1	0	0	0	0.55	0	1	0	2.17
ZINC1530948	O=C1CC[C@H](C(=O)N1)N1C(=O)c2c(C1=O)cccc2	C13H10N2O4	258.23	19	6	0.23	1	4	1	70.95	83.55	1.25	0.33	-0.67	0.87	1.02	0.56	-1.82	3.94	0.0153	Very soluble	-1.65	5.81	0.0225	Very soluble	-3.05	0.229	0.000885	Soluble	High	No	No	No	No	No	No	No	-7.64	0	1	0	0	0	0.55	0	1	0	2.17
ZINC1530968	Clc1cc(Cl)c(c(c1O)Cc1c(O)c(Cl)cc(c1Cl)Cl)Cl	C13H6Cl6O2	406.9	21	12	0.08	2	2	2	90	40.46	3.16	7.54	6.61	5.78	6.71	5.96	-7.4	1.61e-05	3.95e-08	Poorly soluble	-8.23	2.42e-06	5.96e-09	Poorly soluble	-7.78	6.74e-06	1.66e-08	Poorly soluble	High	No	No	No	No	Yes	No	No	-3.43	1	1	0	1	1	0.55	0	1	2	2.28
ZINC1530977	CN(Cc1cccc2c1cccc2)C/C=C/c1ccccc1	C21H21N	287.4	22	16	0.14	5	1	0	95.84	3.24	3.35	5.15	4.72	4.74	5.01	4.59	-5.07	0.00242	8.42e-06	Moderately soluble	-4.96	0.00313	1.09e-05	Moderately soluble	-7.21	1.78e-05	6.21e-08	Poorly soluble	High	Yes	No	Yes	Yes	No	Yes	No	-4.4	1	0	0	0	2	0.55	0	0	1	2.45
ZINC1532517	OC(=O)C(=O)C	C3H4O3	88.06	6	0	0.33	1	3	1	18.51	54.37	0.25	-0.33	-0.34	-0.96	-0.48	-0.37	-0.11	68	0.773	Very soluble	-0.35	39.3	0.446	Very soluble	0.51	286	3.25	Soluble	High	No	No	No	No	No	No	No	-7.07	0	3	0	0	2	0.85	0	1	1	1
ZINC1532522	NCCCC[C@@H](C(=O)O)N	C6H14N2O2	146.19	10	0	0.83	5	4	3	38.14	89.34	0.97	-3.05	-0.47	-2.67	-0.72	-1.19	1.51	4680	32	Highly soluble	1.74	7990	54.7	Highly soluble	-0.18	96.1	0.658	Soluble	High	No	No	No	No	No	No	No	-9.36	0	3	0	0	2	0.55	0	0	1	1.75
ZINC1532526	NC(=O)CC[C@@H](C(=O)O)N	C5H10N2O3	146.14	10	0	0.6	4	4	3	33.54	106.41	0.38	-3.15	-1.34	-3.58	-1.42	-1.82	1.5	4650	31.8	Highly soluble	1.48	4440	30.4	Highly soluble	0.68	698	4.78	Soluble	High	No	No	No	No	No	No	No	-9.43	0	3	0	0	2	0.55	0	0	1	1.76
ZINC1532529	CSCC[C@@H](C(=O)O)N	C5H11NO2S	149.21	9	0	0.8	4	3	2	38.22	88.62	1.12	-1.87	0.15	-2.2	-0.15	-0.59	0.68	709	4.75	Highly soluble	0.53	504	3.38	Highly soluble	-0.23	87.5	0.586	Soluble	High	No	No	No	No	No	No	No	-8.54	0	2	0	0	1	0.55	0	0	1	2.43
ZINC1532728	OC(=O)C[N+](C)(C)C	C5H12NO2+	118.15	8	0	0.8	2	2	1	30.3	37.3	-2.5	-0.13	-0.22	-3.67	-3.33	-1.97	-0.36	51.7	0.438	Very soluble	-0.2	74.6	0.632	Very soluble	-0.82	17.7	0.15	Soluble	High	No	No	No	No	No	No	No	-7.11	0	2	0	0	1	0.55	0	1	1	1
ZINC1536779	CNCC[C@@H](c1cccs1)Oc1cccc2c1cccc2	C18H19NOS	297.41	21	15	0.22	6	2	1	90.03	49.5	3.37	4.32	4.31	3.12	5.22	4.07	-4.54	0.00861	2.9e-05	Moderately soluble	-5.07	0.00251	8.44e-06	Moderately soluble	-6.89	3.86e-05	1.3e-07	Poorly soluble	High	Yes	Yes	Yes	Yes	Yes	Yes	Yes	-5.05	0	0	0	0	0	0.55	0	0	1	3.16
ZINC1542930	CCCCCCC(c1cc(O)c2c(c1)OC([C@H]1[C@H]2CC(=O)CC1)(C)C)(C)C	C24H36O3	372.54	27	6	0.71	6	3	1	112.89	46.53	3.98	7.44	6.26	4.16	6.28	5.62	-6.61	9.24e-05	2.48e-07	Poorly soluble	-8.25	2.1e-06	5.64e-09	Poorly soluble	-6.87	5.01e-05	1.35e-07	Poorly soluble	High	No	Yes	No	No	No	Yes	Yes	-3.29	1	1	0	1	1	0.55	0	0	2	4.35
ZINC1546066	COCCOc1cc2c(ncnc2cc1OCCOC)Nc1cccc(c1)C#C	C22H23N3O4	393.44	29	16	0.27	10	6	1	111.4	74.73	3.67	3.31	3.48	1.62	4.06	3.23	-4.11	0.0303	7.71e-05	Moderately soluble	-4.56	0.011	2.78e-05	Moderately soluble	-7.26	2.15e-05	5.46e-08	Poorly soluble	High	Yes	No	Yes	Yes	Yes	Yes	Yes	-6.35	0	0	0	0	0	0.55	0	1	2	3.19
ZINC1547851	CC[C@H](N1CCCC1=O)C(=O)N	C8H14N2O2	170.21	12	0	0.75	3	2	1	48.37	63.4	1.32	-0.34	-0.51	-0.27	0.27	0.1	-0.48	56	0.329	Very soluble	-0.53	50.3	0.295	Very soluble	-0.64	39.1	0.23	Soluble	High	No	No	No	No	No	No	No	-7.58	0	1	0	0	1	0.55	0	0	1	1.82
ZINC1552174	O=C1CCc2c(N1)ccc(c2)OCCCCc1nnnn1C1CCCCC1	C20H27N5O2	369.46	27	11	0.6	7	5	1	106.5	81.93	3.38	3.1	2.89	3.04	3.1	3.1	-3.92	0.0441	0.000119	Soluble	-4.49	0.012	3.25e-05	Moderately soluble	-5.7	0.000746	2.02e-06	Moderately soluble	High	No	Yes	No	Yes	Yes	No	Yes	-6.35	0	0	0	0	0	0.55	0	0	1	3.16
ZINC1554588	CC(=O)NCCCS(=O)(=O)O	C5H11NO4S	181.21	11	0	0.8	5	4	2	39.69	91.85	-0.23	-1.22	0.48	-0.65	-0.92	-0.51	0.14	247	1.36	Highly soluble	-0.21	111	0.611	Very soluble	-0.83	26.7	0.147	Soluble	High	No	No	No	No	No	No	No	-8.27	0	1	0	0	1	0.56	0	1	1	2.24
ZINC1576892	CCCCCCc1ccc(cc1O)O	C12H18O2	194.27	14	6	0.5	5	2	2	59.49	40.46	2.5	3.45	3.22	2.67	3.08	2.99	-3.21	0.121	0.000624	Soluble	-3.98	0.0203	0.000104	Soluble	-3.66	0.0423	0.000218	Soluble	High	Yes	No	Yes	No	No	Yes	No	-5.04	0	0	0	0	1	0.55	0	0	1	1.73
ZINC1690604	C[C@@H](Cc1ccc(cc1)O)N	C9H13NO	151.21	11	6	0.33	2	2	2	45.75	46.25	1.68	1.44	1.28	1.53	1.45	1.48	-1.96	1.67	0.0111	Very soluble	-2.02	1.45	0.00962	Soluble	-2.29	0.783	0.00518	Soluble	High	Yes	No	No	No	No	No	No	-6.2	0	1	0	0	1	0.55	0	0	1	1.33
ZINC1843099	COc1cc2nc(nc(c2cc1OC)N)N(CCCNC(=O)[C@H]1CCCO1)C	C19H27N5O4	389.45	28	10	0.53	9	6	2	106.76	111.83	2.97	1.67	1.36	0.42	1.46	1.58	-2.98	0.411	0.00105	Soluble	-3.63	0.0908	0.000233	Soluble	-4.71	0.00754	1.94e-05	Moderately soluble	High	No	Yes	No	No	No	No	No	-7.49	0	0	0	0	0	0.55	0	0	2	3.59
ZINC1849548	[O-][N+](=O)O[C@@H]1CO[C@H]2[C@@H]1OC[C@@H]2O	C6H9NO6	191.14	13	0	1	2	6	1	39.25	93.74	0.79	-0.4	-1.28	-2.01	-2.54	-1.09	-0.64	43.7	0.229	Very soluble	-1.1	15	0.0786	Very soluble	1.35	4300	22.5	Soluble	High	No	No	No	No	No	No	No	-7.75	0	2	0	0	1	0.55	0	2	1	4.27
ZINC1850374	ClC(=C[C@@H]1[C@H](C1(C)C)C(=O)OCc1cccc(c1)Oc1ccccc1)Cl	C21H20Cl2O3	391.29	26	12	0.29	7	3	0	104.41	35.53	4.47	6.5	5.96	4.43	5.57	5.39	-6.24	0.000225	5.75e-07	Poorly soluble	-7.04	3.55e-05	9.07e-08	Poorly soluble	-7.13	2.89e-05	7.38e-08	Poorly soluble	High	No	No	Yes	Yes	Yes	Yes	Yes	-4.07	1	1	0	1	1	0.55	0	0	2	3.73
ZINC1850376	ClC(=C[C@H]1[C@H](C1(C)C)C(=O)OCc1cccc(c1)Oc1ccccc1)Cl	C21H20Cl2O3	391.29	26	12	0.29	7	3	0	104.41	35.53	4.39	6.5	5.96	4.43	5.57	5.37	-6.24	0.000225	5.75e-07	Poorly soluble	-7.04	3.55e-05	9.07e-08	Poorly soluble	-7.13	2.89e-05	7.38e-08	Poorly soluble	High	No	No	Yes	Yes	Yes	Yes	Yes	-4.07	1	1	0	1	1	0.55	0	0	2	3.73
ZINC1995484	OC[C@H](OCn1cnc2c1nc(N)[nH]c2=O)COC(=O)[C@H](C(C)C)N	C14H22N6O5	354.36	25	9	0.57	9	8	4	88.51	171.37	0.72	-0.63	-1.58	-1.28	-0.6	-0.67	-1.31	17.3	0.0487	Very soluble	-2.5	1.13	0.00319	Soluble	-1.48	11.8	0.0333	Soluble	Low	No	Yes	No	No	No	No	No	-8.91	1	1	1	1	1	0.55	0	0	2	3.98
ZINC1999487	NC1=NC[C@@H]2N1c1ccccc1Cc1c2cccc1	C16H15N3	249.31	19	12	0.19	0	1	1	83.49	41.62	2.14	3.51	1.38	3.05	2.6	2.54	-4.06	0.0215	8.62e-05	Moderately soluble	-4.07	0.0213	8.56e-05	Moderately soluble	-4.8	0.00393	1.58e-05	Moderately soluble	High	Yes	Yes	Yes	No	No	Yes	No	-5.33	0	0	0	0	0	0.55	0	0	2	3.6
ZINC2008866	CC(=O)NC[C@@H]1OC(=O)N(C1)c1ccc(c(c1)F)N1CCOCC1	C16H20FN3O4	337.35	24	6	0.5	5	5	1	91.06	71.11	2.44	0.69	0.78	0.99	1.25	1.23	-2.22	2.03	0.00601	Soluble	-1.76	5.86	0.0174	Very soluble	-3.19	0.218	0.000647	Soluble	High	No	Yes	No	No	No	No	No	-7.87	0	0	0	0	0	0.55	1	0	0	3.32
ZINC2016037	Clc1ccc(c(c1)Cl)[C@H](Cn1ccnc1)OCc1csc2c1cccc2Cl	C20H15Cl3N2OS	437.77	27	20	0.15	6	2	0	113.57	55.29	3.75	6.32	6.54	4.38	6.9	5.58	-6.69	8.98e-05	2.05e-07	Poorly soluble	-7.27	2.35e-05	5.36e-08	Poorly soluble	-8.72	8.3e-07	1.9e-09	Poorly soluble	High	No	Yes	Yes	Yes	Yes	Yes	Yes	-4.48	1	1	0	1	1	0.55	0	0	2	3.74
ZINC2016052	ClC[C@H]1CO1	C3H5ClO	92.52	5	0	1	1	1	0	20.3	12.53	1.57	0.45	0.62	0.35	1.88	0.97	-0.63	21.6	0.234	Very soluble	-0.28	48.4	0.523	Very soluble	-0.87	12.5	0.135	Soluble	Low	No	No	No	No	No	No	No	-6.54	0	3	0	0	3	0.55	0	2	1	2.17
ZINC2032615	ClC(=C[C@H]1[C@@H](C1(C)C)C(=O)OCc1cccc(c1)Oc1ccccc1)Cl	C21H20Cl2O3	391.29	26	12	0.29	7	3	0	104.41	35.53	4.42	6.5	5.96	4.43	5.57	5.38	-6.24	0.000225	5.75e-07	Poorly soluble	-7.04	3.55e-05	9.07e-08	Poorly soluble	-7.13	2.89e-05	7.38e-08	Poorly soluble	High	No	No	Yes	Yes	Yes	Yes	Yes	-4.07	1	1	0	1	1	0.55	0	0	2	3.73
ZINC2510358	O=C1NC(=O)NC1(c1ccccc1)c1ccccc1	C15H12N2O2	252.27	19	12	0.07	2	2	2	77.5	58.2	1.65	2.47	0.9	1.61	2.42	1.81	-3.3	0.128	0.000506	Soluble	-3.34	0.116	0.000461	Soluble	-5.62	0.000607	2.4e-06	Moderately soluble	High	Yes	No	Yes	No	No	No	No	-6.09	0	0	0	0	0	0.55	0	1	0	1.83
ZINC2519740	CC(c1cccc(c1OCOP(=O)(O)O)C(C)C)C	C13H21O5P	288.28	19	6	0.54	6	5	2	74.17	85.8	1.73	2.46	3.38	2.06	2.15	2.35	-3.01	0.279	0.000966	Soluble	-3.91	0.0358	0.000124	Soluble	-2.79	0.466	0.00162	Soluble	High	No	No	No	No	No	No	No	-6.31	0	0	0	0	0	0.56	0	2	0	3.06
ZINC2522669	CCC(=O)N(c1ccccc1)C1CCN(CC1)CCc1ccccc1	C22H28N2O	336.47	25	12	0.41	7	2	0	108.49	23.55	3.64	4.05	3.76	3.62	3.85	3.78	-4.37	0.0143	4.26e-05	Moderately soluble	-4.25	0.019	5.64e-05	Moderately soluble	-6.26	0.000183	5.45e-07	Poorly soluble	High	Yes	No	No	Yes	No	Yes	Yes	-5.48	0	0	0	0	0	0.55	0	0	1	2.22
ZINC2525885	CN(C[C@H](C1(O)CCCCC1)c1ccc(cc1)O)C	C16H25NO2	263.38	19	6	0.62	4	3	2	78.68	43.7	2.68	-1.25	2.73	2.17	2.65	1.8	-0.66	58.3	0.221	Very soluble	0.83	1770	6.73	Highly soluble	-3.47	0.0894	0.00034	Soluble	High	Yes	Yes	No	No	No	Yes	No	-8.79	0	0	0	0	0	0.55	0	0	0	2.48
ZINC2539827	C[C@@H]([C@@H]([C@@H]1CNc2c(N1)c(=O)nc([nH]2)N)O)O	C9H15N5O3	241.25	17	6	0.56	2	4	6	68.37	136.29	0.23	-1.94	-2.84	-1.35	-0.97	-1.37	-0.24	138	0.572	Very soluble	-0.4	96	0.398	Very soluble	-0.97	26.1	0.108	Soluble	Low	No	No	No	No	No	No	No	-9.15	1	1	0	1	1	0.55	0	0	1	3.75
ZINC2548959	COc1c2oc(=O)ccc2cc2c1occ2	C12H8O4	216.19	16	13	0.08	1	4	0	58.75	52.58	2.22	2	2.55	1.18	2.88	2.16	-2.98	0.229	0.00106	Soluble	-2.73	0.402	0.00186	Soluble	-4.63	0.00501	2.32e-05	Moderately soluble	High	Yes	No	Yes	No	No	No	No	-6.2	0	0	0	0	0	0.55	0	1	1	2.97
ZINC2568036	O=C1CN(C(=O)N1)/N=C/c1ccc(o1)c1ccc(cc1)[N+](=O)[O-]	C14H10N4O5	314.25	23	11	0.07	4	6	1	88.24	120.73	1.34	1.7	0.98	0	-0.15	0.78	-2.95	0.353	0.00112	Soluble	-3.85	0.0443	0.000141	Soluble	-3.58	0.0827	0.000263	Soluble	High	No	No	No	No	No	No	No	-7.01	0	0	0	0	0	0.55	0	4	0	3.27
ZINC2570817	OC(=O)Cc1cccc(c1N)C(=O)c1ccc(cc1)Br	C15H12BrNO3	334.16	20	12	0.07	4	3	2	79.97	80.39	1.75	3.29	2.9	2.5	3.12	2.71	-4.16	0.0229	6.85e-05	Moderately soluble	-4.65	0.00742	2.22e-05	Moderately soluble	-5.11	0.00262	7.83e-06	Moderately soluble	High	No	No	Yes	No	Yes	No	No	-6	0	0	0	0	0	0.56	1	1	0	2.27
ZINC2599970	O=CNc1cc(ccc1O)[C@H](CN[C@@H](Cc1ccc(cc1)OC)C)O	C19H24N2O4	344.4	25	12	0.32	9	5	4	97.5	90.82	2.35	1.84	1.71	1.79	2.63	2.06	-2.9	0.438	0.00127	Soluble	-3.37	0.148	0.000429	Soluble	-5.2	0.00216	6.28e-06	Moderately soluble	High	No	Yes	No	No	No	Yes	No	-7.09	0	0	0	0	0	0.55	0	2	1	3.08
ZINC2847375	CCN([C@@H](C(=O)c1ccccc1)C)CC	C13H19NO	205.3	15	6	0.46	5	2	0	63.57	20.31	2.79	2.81	2.6	2.32	2.58	2.62	-2.85	0.291	0.00142	Soluble	-2.89	0.262	0.00128	Soluble	-3.71	0.0402	0.000196	Soluble	High	Yes	No	No	No	No	No	No	-5.56	0	0	0	0	0	0.55	0	0	1	1.78
ZINC3008621	CCCC(C(=O)O)CCC	C8H16O2	144.21	10	0	0.88	5	2	1	42.34	37.3	1.99	2.75	2.29	1.96	1.6	2.12	-2.14	1.05	0.0073	Soluble	-3.19	0.0935	0.000648	Soluble	-1.67	3.07	0.0213	Soluble	High	Yes	No	No	No	No	No	No	-5.23	0	1	0	0	1	0.85	0	0	1	1.28
ZINC3079342	NC(=O)OCC[N+](C)(C)C	C6H15N2O2+	147.2	10	0	0.83	4	2	1	37.71	52.32	-1.95	-4.87	-0.21	-3.74	-3.53	-2.86	2.58	55900	380	Highly soluble	4.4	3730000	25300	Highly soluble	-1.22	8.95	0.0608	Soluble	High	No	Yes	No	No	No	No	No	-10.66	0	2	0	0	2	0.55	0	1	1	1.84
ZINC3201907	COc1ccc2c(c1)[C@@]13CCCC[C@@H]3[C@H](C2)N(CC1)C	C18H25NO	271.4	20	6	0.67	1	2	0	86.48	12.47	3.31	3.44	3	3.53	3.57	3.37	-3.85	0.0387	0.000143	Soluble	-3.38	0.112	0.000414	Soluble	-4.54	0.00774	2.85e-05	Moderately soluble	High	Yes	Yes	No	No	No	Yes	No	-5.51	0	0	0	0	0	0.55	0	0	0	3.73
ZINC3604264	O=C1CC[C@H](C(=O)N1)N1Cc2c(C1=O)cccc2N	C13H13N3O3	259.26	19	6	0.31	1	3	2	74.93	92.5	1.02	-0.5	-0.88	0.54	0.61	0.16	-1.3	13	0.0501	Very soluble	-0.97	27.5	0.106	Very soluble	-2.81	0.406	0.00157	Soluble	High	No	No	No	No	No	No	No	-8.24	0	1	0	0	0	0.55	0	2	0	2.33
ZINC3607120	COc1c(N2CCN[C@@H](C2)C)c(F)cc2c1n(cc(c2=O)C(=O)O)C1CC1	C19H22FN3O4	375.39	27	10	0.47	4	6	2	106.55	83.8	2.56	-0.74	1.58	1.21	2.04	1.33	-1.71	7.3	0.0194	Very soluble	-0.54	107	0.286	Very soluble	-3.76	0.0654	0.000174	Soluble	High	No	Yes	No	No	No	No	No	-9.12	0	0	0	0	0	0.55	0	0	1	3.47
ZINC3645145	N[C@H](C(=O)O)CC(C)C	C6H13NO2	131.17	9	0	0.83	3	3	2	35.44	63.32	1.15	-1.52	0.44	-1.82	-0.15	-0.38	0.5	417	3.18	Highly soluble	0.7	652	4.97	Highly soluble	-0.14	96.1	0.733	Soluble	High	No	No	No	No	No	No	No	-8.18	0	2	0	0	1	0.55	0	0	1	1.39
ZINC3651680	CC[C@H](C1(CC)C(=O)NC(=O)NC1=O)C	C10H16N2O3	212.25	15	0	0.7	3	3	2	62.23	75.27	1.36	1.65	0.03	0.64	1.33	1	-2	2.14	0.0101	Very soluble	-2.84	0.304	0.00143	Soluble	-2.77	0.356	0.00168	Soluble	High	No	No	No	No	No	No	No	-6.42	0	0	0	0	0	0.55	0	1	1	2.4
ZINC3775644	Nc1ccc2c(c1)nc1c(c2)ccc(c1)N	C13H11N3	209.25	16	14	0	0	1	2	68.06	64.93	1.44	1.83	2.57	1.79	2.01	1.93	-2.94	0.242	0.00115	Soluble	-2.81	0.321	0.00154	Soluble	-4.67	0.00453	2.16e-05	Moderately soluble	High	Yes	Yes	Yes	No	No	Yes	Yes	-6.28	0	0	0	0	0	0.55	0	2	1	1.48
ZINC3776875	FC(O[C@H](C(F)(F)F)F)F	C3H2F6O	168.04	10	0	1	3	7	0	17.96	9.23	1.27	2.65	4.6	1.53	2.45	2.5	-2.35	0.745	0.00443	Soluble	-2.49	0.538	0.0032	Soluble	-1.44	6.17	0.0367	Soluble	High	Yes	No	No	No	No	No	No	-5.44	0	2	0	0	3	0.55	0	0	1	2.07
ZINC3779042	OC[C@H]1O[C@H](C[C@@H]1N=[N+]=[N-])n1cc(C)c(=O)[nH]c1=O	C10H13N5O4	267.24	19	6	0.6	3	7	2	61.73	134.07	1.76	0.05	-0.52	-1.25	-0.78	-0.15	-1.56	7.29	0.0273	Very soluble	-2.42	1.02	0.00381	Soluble	-1.16	18.4	0.0687	Soluble	High	No	No	No	No	No	No	No	-7.89	0	1	0	1	0	0.55	1	3	0	3.93
ZINC3781664	CCCN[C@H]1CCc2c(C1)sc(n2)N	C10H17N3S	211.33	14	5	0.7	3	2	2	61.17	79.18	2.28	1.86	1.59	1.01	2.64	1.88	-2.39	0.864	0.00409	Soluble	-3.14	0.152	0.000718	Soluble	-3.07	0.18	0.000853	Soluble	High	No	No	Yes	No	No	No	No	-6.27	0	0	0	0	0	0.55	0	0	1	3.37
ZINC3782550	NCC(=O)CCC(=O)O	C5H9NO3	131.13	9	0	0.6	4	4	2	30.83	80.39	0.13	-3.81	-0.62	-0.94	-0.53	-1.15	2.01	13500	103	Highly soluble	2.71	67900	518	Highly soluble	-0.02	125	0.951	Soluble	High	No	No	No	No	No	No	No	-9.8	0	4	0	0	2	0.55	0	0	1	1.16
ZINC3782599	O=C1C=C[C@]2([C@H](N1)CC[C@@H]1[C@@H]2CC[C@]2([C@H]1CC[C@@H]2C(=O)NC(C)(C)C)C)C	C23H36N2O2	372.54	27	0	0.83	3	2	2	113.18	58.2	3.42	3.03	3.43	3.46	3.2	3.31	-3.86	0.0513	0.000138	Soluble	-3.92	0.045	0.000121	Soluble	-4.54	0.0107	2.86e-05	Moderately soluble	High	Yes	Yes	No	No	No	No	No	-6.42	0	0	0	0	0	0.55	0	0	1	5.37
ZINC3782818	CCOc1nc2c(n1Cc1ccc(cc1)c1ccccc1c1nnn[nH]1)c(ccc2)C(=O)O	C24H20N6O3	440.45	33	26	0.12	7	7	2	122.35	118.81	2.26	4.14	4.03	3.51	3.61	3.51	-5.3	0.00221	5.01e-06	Moderately soluble	-6.34	0.0002	4.55e-07	Poorly soluble	-7.93	5.22e-06	1.19e-08	Poorly soluble	High	No	Yes	Yes	Yes	Yes	No	No	-6.05	0	0	0	0	0	0.56	0	0	2	3.33
ZINC3785268	OCc1cc(ccc1O)[C@@H](CNCCCCCCOCCCCc1ccccc1)O	C25H37NO4	415.57	30	12	0.52	16	5	4	121.97	81.95	3.92	3.9	3.63	2.64	5.58	3.93	-4.11	0.032	7.7e-05	Moderately soluble	-5.32	0.00199	4.8e-06	Moderately soluble	-7.79	6.66e-06	1.6e-08	Poorly soluble	High	No	Yes	No	No	No	No	Yes	-6.07	0	0	1	0	1	0.55	0	0	3	3.66
ZINC3786192	OC(=O)CC1=C(C)/C(=C/c2ccc(cc2)[S@](=O)C)/c2c1cc(F)cc2	C20H17FO3S	356.41	25	12	0.15	4	4	1	98.35	73.58	2.79	3.42	5.54	3.74	4.26	3.95	-4.3	0.018	5.06e-05	Moderately soluble	-4.65	0.00807	2.26e-05	Moderately soluble	-6.55	0.0001	2.81e-07	Poorly soluble	High	No	No	No	Yes	Yes	No	Yes	-6.05	0	0	0	0	0	0.85	0	1	1	3.97
ZINC3787060	OC(=O)[C@@H]1N2C(=O)C[C@H]2S(=O)(=O)[C@@]1(C)Cn1ccnn1	C10H12N4O5S	300.29	20	5	0.6	3	7	1	68.49	130.84	0.05	-1.98	-0.82	-0.44	-2	-1.04	-0.44	109	0.362	Very soluble	-0.24	171	0.57	Very soluble	-0.25	168	0.56	Soluble	High	No	No	No	No	No	No	No	-9.54	0	1	0	0	0	0.56	0	0	0	4.23
ZINC3794601	N#Cc1ccc2c(c1)CO[C@]2(CCCN(C)C)c1ccc(cc1)F	C20H21FN2O	324.39	24	12	0.35	5	4	0	91.32	36.26	3.51	3.23	3.97	2.89	4.79	3.68	-3.93	0.0385	0.000119	Soluble	-3.66	0.0702	0.000217	Soluble	-6.86	4.47e-05	1.38e-07	Poorly soluble	High	Yes	Yes	No	No	No	Yes	Yes	-5.99	0	0	0	0	0	0.55	0	0	0	3.44
ZINC3794794	OCCNCCNc1ccc(c2c1C(=O)c1c(C2=O)c(O)ccc1O)NCCNCCO	C22H28N4O6	444.48	32	12	0.36	12	8	8	119.18	163.18	3.03	1	-0.52	-1.69	1.62	0.69	-2.71	0.864	0.00194	Soluble	-4.02	0.0429	9.65e-05	Moderately soluble	-6.27	0.000239	5.37e-07	Poorly soluble	Low	No	Yes	No	No	No	No	No	-8.3	1	1	2	1	2	0.55	2	1	2	3.61
ZINC3798064	OC[C@H]1O[C@H](C[C@@H]1O)n1cnc2c1nc(Cl)nc2N	C10H12ClN5O3	285.69	19	9	0.5	2	6	3	66.52	119.31	1.15	0.02	-0.61	-0.57	-0.84	-0.17	-1.84	4.11	0.0144	Very soluble	-2.08	2.39	0.00837	Soluble	-1.01	28.2	0.0986	Soluble	High	No	No	No	No	No	No	No	-8.03	0	1	0	0	0	0.55	0	0	0	3.65
ZINC3798247	OC[C@H]1O[C@H]([C@H]([C@@H]1O)F)n1cnc2c1nc(Cl)nc2N	C10H11ClFN5O3	303.68	20	9	0.5	2	7	3	66.57	119.31	1.37	0.66	-0.25	-0.43	-0.82	0.11	-2.34	1.39	0.00458	Soluble	-2.74	0.551	0.00181	Soluble	-1.05	27.2	0.0895	Soluble	High	No	No	No	No	No	No	No	-7.68	0	0	0	0	0	0.55	0	0	0	3.93
ZINC3798537	CCOc1cc(ccc1C(=O)O)CC(=O)N[C@H](c1ccccc1N1CCCCC1)CC(C)C	C27H36N2O4	452.59	33	12	0.48	11	4	2	135.45	78.87	3.81	5.18	4.51	3.44	5.12	4.41	-5.45	0.0016	3.53e-06	Moderately soluble	-6.58	0.000118	2.61e-07	Poorly soluble	-7.1	3.6e-05	7.96e-08	Poorly soluble	High	No	Yes	No	No	Yes	Yes	Yes	-5.38	0	1	1	0	1	0.56	0	0	3	3.89
ZINC3798750	N[C@H](C=C)CCC(=O)O	C6H11NO2	129.16	9	0	0.5	4	3	2	34.96	63.32	1.17	-2.16	0.36	0.28	0.01	-0.07	0.98	1240	9.64	Highly soluble	1.36	2960	22.9	Highly soluble	-0.16	89.1	0.69	Soluble	High	No	No	No	No	No	No	No	-8.62	0	2	0	0	2	0.55	0	1	1	1.94
ZINC3798763	CC[C@@H](C(=O)O[C@H]1C[C@H](O)C=C2[C@H]1[C@@H](CC[C@H](C[C@H](CC(=O)O)O)O)[C@H](C=C2)C)C	C23H36O7	424.53	30	0	0.74	11	7	4	114.04	124.29	2.99	2.49	2.44	1.74	2.15	2.36	-3.31	0.206	0.000484	Soluble	-4.75	0.00763	1.8e-05	Moderately soluble	-1.36	18.7	0.0441	Soluble	High	No	Yes	No	No	No	No	Yes	-7.12	0	0	1	0	0	0.56	0	0	2	5.88
ZINC3799072	OCc1cc(ccc1O)[C@H](CNCCCCCCOCCCCc1ccccc1)O	C25H37NO4	415.57	30	12	0.52	16	5	4	121.97	81.95	4.36	3.9	3.63	2.64	5.58	4.02	-4.11	0.032	7.7e-05	Moderately soluble	-5.32	0.00199	4.8e-06	Moderately soluble	-7.79	6.66e-06	1.6e-08	Poorly soluble	High	No	Yes	No	No	No	No	Yes	-6.07	0	0	1	0	1	0.55	0	0	3	3.66
ZINC3802417	OC(=O)CNC(=O)[C@@H](Cc1ccccc1)CN1CC[C@@]([C@H](C1)C)(C)c1cccc(c1)O	C25H32N2O4	424.53	31	12	0.44	9	5	3	124.96	89.87	2.45	1.68	2.67	2.5	3.61	2.58	-3.22	0.254	0.000598	Soluble	-3.18	0.279	0.000658	Soluble	-6.13	0.000313	7.36e-07	Poorly soluble	High	No	Yes	No	No	No	Yes	No	-7.7	0	0	0	0	0	0.55	0	0	2	3.73
ZINC3802690	OC[C@@H]1[C@@H](O)C[C@@H](C1=C)n1cnc2c1nc(N)[nH]c2=O	C12H15N5O3	277.28	20	9	0.42	2	5	4	72.39	130.05	0.79	-1.12	-0.82	-0.72	-0.42	-0.46	-1.05	24.5	0.0882	Very soluble	-1.12	21	0.0759	Very soluble	-1.23	16.5	0.0594	Soluble	High	No	No	No	No	No	No	No	-8.79	0	1	0	0	0	0.55	0	1	0	3.53
ZINC3806262	OC[C@H]1O[C@H](C[C@@H]1O)n1cnc2c1N=CNC[C@H]2O	C11H16N4O4	268.27	19	5	0.64	2	6	4	72.08	112.13	0.9	-2.68	-2.59	-1.65	-1.22	-1.45	0.12	356	1.33	Highly soluble	0.88	2010	7.5	Highly soluble	0.28	517	1.93	Soluble	Low	No	No	No	No	No	No	No	-9.84	0	1	0	0	1	0.55	0	0	0	4.77
ZINC3806413	CCCCCOC(=O)Nc1nc(=O)n(cc1F)[C@@H]1O[C@@H]([C@H]([C@H]1O)O)C	C15H22FN3O6	359.35	25	6	0.67	8	8	3	85.25	122.91	2.24	0.56	0.67	0.53	0.15	0.83	-2.07	3.06	0.0085	Soluble	-2.71	0.695	0.00193	Soluble	-1.88	4.74	0.0132	Soluble	High	No	Yes	No	No	No	No	No	-8.09	0	0	0	0	0	0.55	0	0	2	4.67
ZINC3807804	Clc1ccccc1C(n1cncc1)(c1ccccc1)c1ccccc1	C22H17ClN2	344.84	25	23	0.05	4	1	0	101.84	17.82	3.07	5.41	5.38	4.38	4.98	4.64	-5.8	0.000543	1.57e-06	Moderately soluble	-5.54	0.000996	2.89e-06	Moderately soluble	-8.59	8.88e-07	2.58e-09	Poorly soluble	High	Yes	Yes	Yes	Yes	Yes	Yes	Yes	-4.56	1	0	0	0	1	0.55	0	0	1	2.25
ZINC3812841	CC[C@@H](C(=O)O[C@H]1C[C@@H](C)C=C2[C@H]1[C@@H](CC[C@@H]1C[C@@H](O)CC(=O)O1)[C@H](C=C2)C)C	C24H36O5	404.54	29	0	0.75	7	5	1	113.92	72.83	3.86	4.26	4.2	3.57	3.51	3.88	-4.57	0.0109	2.69e-05	Moderately soluble	-5.5	0.00128	3.15e-06	Moderately soluble	-3.19	0.263	0.00065	Soluble	High	Yes	No	No	No	Yes	No	Yes	-5.74	0	0	0	0	0	0.55	0	1	2	5.76
ZINC3812869	N[C@H](c1ccccc1)C(=O)N[C@@H]1C(=O)N2[C@@H]1SCC(=C2C(=O)O)Cl	C15H14ClN3O4S	367.81	24	6	0.27	5	5	3	92.04	138.03	1.39	-1.79	-0.08	0.67	0.28	0.09	-0.85	52.2	0.142	Very soluble	-0.59	94	0.256	Very soluble	-2.53	1.09	0.00295	Soluble	High	No	No	No	No	No	No	No	-9.81	0	0	0	1	0	0.55	0	0	1	4.42
ZINC3812888	COc1ccc(cc1OC)CCN(CCC[C@](c1ccc(c(c1)OC)OC)(C(C)C)C#N)C	C27H38N2O4	454.6	33	12	0.52	13	6	0	132.46	63.95	3.81	3.79	5.09	2.96	5.89	4.31	-4.46	0.0159	3.49e-05	Moderately soluble	-4.83	0.00677	1.49e-05	Moderately soluble	-8	4.54e-06	9.98e-09	Poorly soluble	High	Yes	Yes	No	No	No	Yes	Yes	-6.38	0	2	1	0	0	0.55	0	0	3	3.75
ZINC3812897	C#C[C@]1(O)CC[C@@H]2[C@]1(C)CC[C@H]1[C@H]2CCc2c1ccc(c2)O	C20H24O2	296.4	22	6	0.6	0	2	2	88.84	40.46	2.94	3.67	3.69	3.9	3.94	3.63	-4.19	0.0191	6.43e-05	Moderately soluble	-4.21	0.0183	6.18e-05	Moderately soluble	-4.04	0.0269	9.08e-05	Moderately soluble	High	Yes	Yes	No	No	Yes	Yes	No	-5.5	0	0	0	0	0	0.55	0	1	1	4.01
ZINC3812944	O=C(C(C)C)Nc1ccc(c(c1)C(F)(F)F)[N+](=O)[O-]	C11H11F3N2O3	276.21	19	6	0.36	5	6	1	64.19	74.92	1.85	3.35	4.17	2.03	0.92	2.47	-3.57	0.0749	0.000271	Soluble	-4.6	0.00693	2.51e-05	Moderately soluble	-3.49	0.0902	0.000327	Soluble	High	Yes	No	Yes	Yes	No	No	No	-5.61	0	0	0	0	0	0.55	0	2	0	2.05
ZINC3812974	O[C@@H](COc1cccc2c1C[C@H](O)[C@@H](C2)O)CNC(C)(C)C	C17H27NO4	309.4	22	6	0.65	6	5	4	85.53	81.95	2.71	0.71	0.63	0.74	1.85	1.33	-2.01	3.01	0.00974	Soluble	-2.01	3.03	0.0098	Soluble	-3.17	0.211	0.000682	Soluble	High	No	Yes	No	No	No	No	No	-7.68	0	0	0	0	0	0.55	0	0	0	3.92
ZINC3812984	Oc1ccc2c(c1)[C@]13CCCC[C@H]3[C@@H](C2)N(CC1)C	C17H23NO	257.37	19	6	0.65	0	2	1	82.01	23.47	2.7	3.11	2.7	3.3	3.06	2.97	-3.63	0.0605	0.000235	Soluble	-3.27	0.138	0.000535	Soluble	-3.85	0.0367	0.000143	Soluble	High	Yes	Yes	No	No	No	Yes	No	-5.66	0	0	0	0	0	0.55	0	0	0	3.58
ZINC3813010	OC[C@H]1O[C@H](C[C@@H]1O)n1cc(F)c(=O)[nH]c1=O	C9H11FN2O5	246.19	17	6	0.56	2	6	3	53.07	104.55	0.85	-1.16	-1.59	-0.62	-0.07	-0.52	-0.76	42.3	0.172	Very soluble	-0.54	70.5	0.286	Very soluble	-0.34	113	0.457	Soluble	High	No	No	No	No	No	No	No	-8.63	0	1	0	0	0	0.55	0	0	1	3.61
ZINC3813083	O=C(C(c1ccccc1)(c1ccccc1)O)O[C@@H]1CCC[N+](C1)(C)C	C21H26NO3+	340.44	25	12	0.38	5	3	1	102.43	46.53	-0.49	3.25	2.22	-0.99	0.54	0.9	-4.02	0.0323	9.48e-05	Moderately soluble	-3.9	0.0428	0.000126	Soluble	-6.03	0.000317	9.31e-07	Poorly soluble	High	Yes	Yes	No	No	No	Yes	No	-6.07	0	0	0	0	0	0.55	0	1	0	3.36
ZINC3813088	CCCCC[C@@H](/C=C/[C@H]1[C@H](O)CC(=O)[C@@H]1CCCCCCC(=O)O)O	C20H34O5	354.48	25	0	0.8	13	5	3	99.96	94.83	3.3	3.2	3.48	1.98	4.1	3.21	-3.2	0.226	0.000637	Soluble	-4.86	0.00486	1.37e-05	Moderately soluble	-3.22	0.214	0.000603	Soluble	High	No	Yes	No	No	No	Yes	No	-6.19	0	0	1	0	0	0.56	0	1	2	4.91
ZINC3814395	C#C[C@]1(O)CC[C@@H]2[C@]1(CC)CC[C@H]1[C@H]2CCC2=CC(=O)CC[C@H]12	C21H28O2	312.45	23	0	0.76	1	2	1	93.43	37.3	3.22	3.33	3.96	3.95	4.17	3.73	-3.81	0.0485	0.000155	Soluble	-3.79	0.0507	0.000162	Soluble	-3.57	0.0835	0.000267	Soluble	High	Yes	No	No	No	Yes	No	No	-5.84	0	0	0	0	0	0.55	0	1	0	5.12
ZINC3817234	O=C(C1CCC(CC1)(F)F)N[C@H](c1ccccc1)CCN1[C@@H]2CC[C@H]1CC(C2)n1c(C)nnc1C(C)C	C29H41F2N5O	513.67	37	11	0.69	9	6	1	145.84	63.05	3.99	5.15	6.09	4.15	4.78	4.83	-5.9	0.000654	1.27e-06	Moderately soluble	-6.22	0.00031	6.03e-07	Poorly soluble	-7	5.18e-05	1.01e-07	Poorly soluble	High	No	Yes	No	No	No	Yes	Yes	-5.78	2	4	0	1	1	0.17	0	0	3	5.66
ZINC3823475	CN1CCC[C@@H]1Cc1c[nH]c2c1cc(cc2)CCS(=O)(=O)c1ccccc1	C22H26N2O2S	382.52	27	15	0.36	6	3	1	114.38	61.55	2.99	4.09	4.52	3.22	4.41	3.85	-4.8	0.00601	1.57e-05	Moderately soluble	-5.09	0.00312	8.17e-06	Moderately soluble	-7.48	1.27e-05	3.33e-08	Poorly soluble	High	Yes	Yes	Yes	Yes	Yes	Yes	Yes	-5.73	0	0	0	0	0	0.55	0	0	2	3.53
ZINC3823492	OC[C@H]1O[C@H]([C@H]([C@@H]1O)O)n1cnc2c1nc(N)nc2OC	C11H15N5O5	297.27	21	9	0.55	3	8	4	69.17	148.77	1.04	-1.03	-2.29	-1.71	-2.36	-1.27	-1.15	20.9	0.0703	Very soluble	-1.61	7.36	0.0247	Very soluble	0.29	582	1.96	Soluble	Low	No	No	No	No	No	No	No	-8.84	0	1	1	1	0	0.55	0	0	0	4.12
ZINC3824921	OC(=O)C(c1ccc(cc1)[C@H](CCCN1CCC(CC1)C(c1ccccc1)(c1ccccc1)O)O)(C)C	C32H39NO4	501.66	37	18	0.41	10	5	3	151.59	81	4.2	3.01	4.7	3.86	5.65	4.28	-4.55	0.0143	2.84e-05	Moderately soluble	-4.38	0.0211	4.21e-05	Moderately soluble	-8.1	3.96e-06	7.89e-09	Poorly soluble	High	No	Yes	No	No	No	Yes	No	-7.22	1	3	0	0	0	0.55	0	0	2	4.12
ZINC3826253	COc1c(N2C[C@@H]3[C@H](C2)CCCN3)c(F)cc2c1n(cc(c2=O)C(=O)O)C1CC1	C21H24FN3O4	401.43	29	10	0.52	4	6	2	114.05	83.8	2.78	0.61	1.97	1.66	2.23	1.85	-2.7	0.793	0.00198	Soluble	-1.94	4.57	0.0114	Very soluble	-3.95	0.045	0.000112	Soluble	High	No	Yes	No	No	No	Yes	No	-8.32	0	0	0	0	0	0.55	0	0	1	3.89
ZINC3830212	CCCCc1oc2c(c1C(=O)c1cc(I)c(c(c1)I)OCCN(CC)CC)cccc2	C25H29I2NO3	645.31	31	15	0.4	11	4	0	144.33	42.68	5.26	7.57	6.94	4.45	8.24	6.49	-8.24	3.7e-06	5.73e-09	Poorly soluble	-8.3	3.21e-06	4.98e-09	Poorly soluble	-10.36	2.82e-08	4.37e-11	Insoluble	Low	No	Yes	No	No	No	No	No	-4.86	2	3	1	1	2	0.17	0	1	3	4
ZINC3830215	O=C([C@@H](c1ccc(cc1)O)N)N[C@@H]1C(=O)N2[C@@H]1SC([C@@H]2C(=O)O)(C)C	C16H19N3O5S	365.4	25	6	0.44	5	6	4	94.59	158.26	0.95	-1.99	-0.68	0.23	-0.45	-0.39	-0.7	73	0.2	Very soluble	-0.81	56.6	0.155	Very soluble	-1.62	8.67	0.0237	Soluble	Low	No	No	No	No	No	No	No	-9.94	0	1	1	1	1	0.55	0	0	1	4.17
ZINC3830218	N[C@H](c1ccccc1)C(=O)N[C@@H]1C(=O)N2[C@@H]1SC([C@@H]2C(=O)O)(C)C	C16H19N3O4S	349.4	24	6	0.44	5	5	3	92.56	138.03	1.15	-1.13	-0.39	0.75	0.01	0.08	-1.15	24.8	0.0709	Very soluble	-1.28	18.5	0.0528	Very soluble	-2.21	2.15	0.00615	Soluble	Low	No	No	No	No	No	No	No	-9.23	0	0	0	1	0	0.55	0	0	0	4.16
ZINC3830264	C[C@H]1[C@H](NC(=O)/C(=N\OC(C(=O)O)(C)C)/c2csc(n2)N)C(=O)N1S(=O)(=O)O	C13H17N5O8S2	435.43	28	5	0.46	8	10	4	99.76	238.2	0.15	0.27	-0.46	-1.3	-1.7	-0.61	-2.31	2.11	0.00485	Soluble	-4.83	0.00639	1.47e-05	Moderately soluble	-0.19	282	0.649	Soluble	Low	No	Yes	No	No	No	No	No	-8.76	1	1	1	1	1	0.11	0	3	2	4.38
ZINC3830314	C[C@H](C[N+](C)(C)C)OC(=O)N	C7H17N2O2+	161.22	11	0	0.86	4	2	1	42.52	52.32	-1.83	0.03	0.18	-3.38	-3.31	-1.66	-0.59	41	0.254	Very soluble	-0.68	33.6	0.208	Very soluble	-1.26	8.92	0.0553	Soluble	High	No	No	No	No	No	No	No	-7.26	0	0	0	0	1	0.55	0	1	1	2.24
ZINC3830321	CC(=O)Oc1ccc(cc1)C(c1ccccn1)c1ccc(cc1)OC(=O)C	C22H19NO4	361.39	27	18	0.14	7	5	0	101.17	65.49	3.25	3.05	4.11	3.13	4.52	3.61	-4.03	0.0335	9.26e-05	Moderately soluble	-4.09	0.0293	8.1e-05	Moderately soluble	-7.21	2.21e-05	6.12e-08	Poorly soluble	High	Yes	No	Yes	Yes	Yes	No	No	-6.34	0	0	0	0	0	0.55	0	1	1	2.41
ZINC3830339	O[C@H](COc1cccc2c1CCCC2=O)CNC(C)(C)C	C17H25NO3	291.39	21	6	0.59	6	4	2	83.63	58.56	3.3	2.4	2.33	1.48	3.32	2.57	-2.97	0.309	0.00106	Soluble	-3.27	0.156	0.000535	Soluble	-4.67	0.00617	2.12e-05	Moderately soluble	High	Yes	No	No	No	No	Yes	No	-6.37	0	0	0	0	0	0.55	0	0	0	3.24
ZINC3830347	C=CCC1(CC(C)C)C(=O)NC(=O)NC1=O	C11H16N2O3	224.26	16	0	0.55	4	3	2	66.57	75.27	1.53	1.74	0.2	0.84	1.7	1.2	-2.06	1.94	0.00866	Soluble	-2.94	0.259	0.00115	Soluble	-2.83	0.329	0.00147	Soluble	High	No	No	Yes	No	No	No	No	-6.43	0	0	0	0	0	0.55	0	2	1	2.17
ZINC3830391	O=C([C@@H](c1ccc(cc1)O)N)N[C@@H]1C(=O)N2[C@@H]1SCC(=C2C(=O)O)C	C16H17N3O5S	363.39	25	6	0.31	5	6	4	94.07	158.26	1.05	-2.06	-0.55	0.15	-0.33	-0.35	-0.64	82.7	0.228	Very soluble	-0.74	66.6	0.183	Very soluble	-1.73	6.77	0.0186	Soluble	Low	No	No	No	No	No	No	No	-9.98	0	1	1	1	2	0.55	0	0	1	4.4
ZINC3830405	O=C(N[C@@H]1C(=O)N2[C@@H]1SCC(=C2C(=O)O)CSc1nnc(s1)C)Cn1cnnn1	C14H14N8O4S3	454.51	29	10	0.43	8	9	2	106.69	234.93	1.11	-0.58	-1.02	0.08	-0.35	-0.15	-2.02	4.34	0.00956	Soluble	-3.88	0.0595	0.000131	Soluble	-1.76	7.81	0.0172	Soluble	Low	No	Yes	No	No	No	No	No	-9.48	1	1	1	1	1	0.11	0	0	2	4.62
ZINC3830449	CO[C@@]1(NC(=O)Cc2cccs2)C(=O)N2[C@@H]1SCC(=C2C(=O)O)COC(=O)N	C16H17N3O7S2	427.45	28	5	0.38	9	7	3	102.34	201.8	1.02	-0.02	-0.28	-0.08	0.52	0.23	-2.02	4.12	0.00964	Soluble	-3.77	0.0729	0.000171	Soluble	-1.93	5.02	0.0117	Soluble	Low	No	Yes	No	No	No	No	No	-8.92	0	0	1	1	1	0.11	0	1	2	4.66
ZINC3830453	CO/N=C(/c1csc(n1)N)\C(=O)N[C@H]1[C@H]2SCC(=C(N2C1=O)C(=O)O)COC	C15H17N5O6S2	427.46	28	5	0.4	8	8	3	104.89	209.98	1.65	-1.4	-0.91	-1.23	0.31	-0.32	-1.21	26.2	0.0613	Very soluble	-2.51	1.33	0.0031	Soluble	-1.47	14.6	0.0342	Soluble	Low	No	No	No	No	No	No	No	-9.9	1	1	1	1	1	0.11	0	2	2	4.72
ZINC3830569	OC(=O)[C@@H]1N2[C@H](O/C/1=C\CO)CC2=O	C8H9NO5	199.16	14	0	0.5	2	5	2	46.9	87.07	0.86	-1.45	-1.48	-0.43	-0.88	-0.67	-0.03	186	0.935	Very soluble	0.12	266	1.33	Highly soluble	0.99	1970	9.89	Soluble	High	No	No	No	No	No	No	No	-8.54	0	1	0	0	1	0.56	0	0	1	3.7
ZINC3830579	O=C(C(c1ccccc1)(c1ccccc1)O)O[C@H]1C[N+]2(C)CCC1CC2	C22H26NO3+	352.45	26	12	0.41	5	3	1	105.13	46.53	-0.5	3.28	2.22	-0.77	0.51	0.95	-4.1	0.0278	7.89e-05	Moderately soluble	-3.93	0.0412	0.000117	Soluble	-5.96	0.00039	1.11e-06	Moderately soluble	High	Yes	Yes	Yes	No	No	Yes	No	-6.12	0	0	0	0	0	0.55	0	1	1	4.56
ZINC3830716	CCOC(=O)C1(CCN(CC1)CCC(c1ccccc1)(c1ccccc1)C#N)c1ccccc1	C30H32N2O2	452.59	34	18	0.33	9	4	0	138.76	53.33	4.16	6.06	5.1	4.24	6.19	5.15	-6.26	0.000248	5.48e-07	Poorly soluble	-6.96	4.97e-05	1.1e-07	Poorly soluble	-9.44	1.64e-07	3.61e-10	Poorly soluble	High	Yes	Yes	No	Yes	No	Yes	Yes	-4.76	1	1	0	0	1	0.55	0	0	3	3.3
ZINC3830943	OC[C@H](CN(c1c(I)c(C(=O)NC[C@@H](CO)O)c(c(c1I)C(=O)NC[C@@H](CO)O)I)C(=O)C)O	C19H26I3N3O9	821.14	34	6	0.53	15	9	8	145.61	199.89	1.1	-3.05	-1.63	-0.53	2.12	-0.4	-2.15	5.81	0.00708	Soluble	-0.58	214	0.261	Very soluble	-3.41	0.318	0.000387	Soluble	Low	No	Yes	No	No	No	No	No	-13.47	3	3	2	1	4	0.17	0	1	2	4.34
ZINC3830944	OC[C@@H](CN(c1c(I)c(C(=O)NC[C@@H](CO)O)c(c(c1I)C(=O)NC[C@@H](CO)O)I)C(=O)C)O	C19H26I3N3O9	821.14	34	6	0.53	15	9	8	145.61	199.89	1.26	-3.05	-1.63	-0.53	2.12	-0.37	-2.15	5.81	0.00708	Soluble	-0.58	214	0.261	Very soluble	-3.41	0.318	0.000387	Soluble	Low	No	Yes	No	No	No	No	No	-13.47	3	3	2	1	4	0.17	0	1	2	4.34
ZINC3830945	OC[C@H](CN(c1c(I)c(C(=O)NC[C@H](CO)O)c(c(c1I)C(=O)NC[C@@H](CO)O)I)C(=O)C)O	C19H26I3N3O9	821.14	34	6	0.53	15	9	8	145.61	199.89	1.45	-3.05	-1.63	-0.53	2.12	-0.33	-2.15	5.81	0.00708	Soluble	-0.58	214	0.261	Very soluble	-3.41	0.318	0.000387	Soluble	Low	No	Yes	No	No	No	No	No	-13.47	3	3	2	1	4	0.17	0	1	2	4.34
ZINC3830957	COCC(=O)Nc1c(I)c(C(=O)NC[C@@H](CO)O)c(c(c1I)C(=O)N(C[C@@H](CO)O)C)I	C18H24I3N3O8	791.11	32	6	0.5	14	8	6	139.57	168.66	1.73	-2.05	-0.6	0.01	2.6	0.34	-2.67	1.7	0.00215	Soluble	-0.97	85.6	0.108	Very soluble	-4.29	0.041	5.19e-05	Moderately soluble	Low	No	Yes	No	No	No	No	No	-12.58	3	3	2	1	4	0.17	0	1	2	4.02
ZINC3830959	COCC(=O)Nc1c(I)c(C(=O)NC[C@H](CO)O)c(c(c1I)C(=O)N(C[C@@H](CO)O)C)I	C18H24I3N3O8	791.11	32	6	0.5	14	8	6	139.57	168.66	1.17	-2.05	-0.6	0.01	2.6	0.23	-2.67	1.7	0.00215	Soluble	-0.97	85.6	0.108	Very soluble	-4.29	0.041	5.19e-05	Moderately soluble	Low	No	Yes	No	No	No	No	No	-12.58	3	3	2	1	4	0.17	0	1	2	4.02
ZINC3830961	CNC(=O)c1c(I)c(NC(=O)C)c(c(c1I)C(=O)O)I	C11H9I3N2O4	613.91	20	6	0.18	5	4	3	98.86	95.5	1.56	0.58	2.33	2.75	3.48	2.14	-3.9	0.0766	0.000125	Soluble	-2.16	4.26	0.00694	Soluble	-5.08	0.00515	8.39e-06	Moderately soluble	High	No	No	No	No	No	No	Yes	-9.63	1	1	0	0	1	0.56	0	1	1	2.39
ZINC3830986	O=[S@](c1nc2c([nH]1)cccc2)Cc1nccc(c1C)OCC(F)(F)F	C16H14F3N3O2S	369.36	25	15	0.25	6	7	1	87.24	87.08	2.13	3.01	5.49	1.57	3.54	3.15	-4.07	0.0311	8.43e-05	Moderately soluble	-4.5	0.0116	3.14e-05	Moderately soluble	-6.84	5.29e-05	1.43e-07	Poorly soluble	High	No	Yes	Yes	Yes	Yes	Yes	Yes	-6.42	0	0	0	0	0	0.55	0	0	1	3.4
ZINC3830990	CC[C@@H](N1CCCC1=O)C(=O)N	C8H14N2O2	170.21	12	0	0.75	3	2	1	48.37	63.4	1.16	-0.34	-0.51	-0.27	0.27	0.06	-0.48	56	0.329	Very soluble	-0.53	50.3	0.295	Very soluble	-0.64	39.1	0.23	Soluble	High	No	No	No	No	No	No	No	-7.58	0	1	0	0	1	0.55	0	0	1	1.82
ZINC3830993	OC(=O)[C@H](Cc1cc(I)c(c(c1)I)Oc1cc(I)c(c(c1)I)O)N	C15H11I4NO4	776.87	24	12	0.13	5	5	3	124.91	92.78	2.89	2.36	4.56	2.35	5.56	3.54	-6.18	0.000509	6.56e-07	Poorly soluble	-3.95	0.0875	0.000113	Soluble	-6.79	0.000127	1.64e-07	Poorly soluble	High	No	No	No	No	Yes	No	No	-9.36	1	1	0	0	1	0.55	0	1	1	2.98
ZINC3831040	SCCS(=O)(=O)O	C2H6O3S2	142.2	7	0	1	2	3	1	30.19	101.55	-0.12	-0.6	0.88	-0.66	-0.18	-0.14	-0.21	87.4	0.614	Very soluble	-1.06	12.4	0.0869	Very soluble	-0.12	107	0.75	Soluble	High	No	No	No	No	No	No	No	-7.59	0	3	0	0	2	0.56	0	2	1	2.42
ZINC3831051	C[C@H](C[N+](C)(C)C)OC(=O)C	C8H18NO2+	160.23	11	0	0.88	4	2	0	44.23	26.3	-1.91	0.6	0.64	-2.6	-2.14	-1.08	-0.95	18.1	0.113	Very soluble	-0.73	30.1	0.188	Very soluble	-2	1.59	0.00993	Soluble	High	Yes	Yes	No	No	No	No	No	-6.85	0	0	0	0	1	0.55	0	1	1	1.88
ZINC3831139	NC(=O)C[S@](=O)C(c1ccccc1)c1ccccc1	C15H15NO2S	273.35	19	12	0.13	5	2	1	76.69	79.37	1.46	1.72	2.55	2.04	1.85	1.92	-2.76	0.48	0.00175	Soluble	-3	0.272	0.000994	Soluble	-4.97	0.0029	1.06e-05	Moderately soluble	High	No	No	No	No	No	No	No	-6.75	0	0	0	0	0	0.55	0	0	0	2.83
ZINC3831332	C[C@H](CCC[C@@H](CCCC(C)C)C)CCC/C(=C/CC1=C(C)C(=O)c2c(C1=O)cccc2)/C	C31H46O2	450.7	33	6	0.61	14	2	0	144.72	34.14	5.86	10.91	9.16	5.64	9.98	8.31	-8.72	8.62e-07	1.91e-09	Poorly soluble	-11.59	1.16e-09	2.57e-12	Insoluble	-9.73	8.3e-08	1.84e-10	Poorly soluble	Low	No	Yes	Yes	No	No	No	No	-1.3	1	3	1	1	1	0.55	1	1	3	5.35
ZINC3831404	C=C[C@H]1CN2CC[C@H]1C[C@H]2[C@@H](c1ccnc2c1cc(OC)cc2)O	C20H24N2O2	324.42	24	10	0.45	4	4	1	99.73	45.59	3.36	2.88	2.47	2.23	3.11	2.81	-3.71	0.0632	0.000195	Soluble	-3.5	0.103	0.000318	Soluble	-4.31	0.016	4.92e-05	Moderately soluble	High	Yes	No	No	No	No	Yes	No	-6.23	0	0	0	0	0	0.55	0	1	0	4.34
ZINC3831429	C[C@@H](C12CC3CC(C2)CC(C1)C3)N	C12H21N	179.3	13	0	1	1	1	1	55.9	26.02	2.53	2.62	2.55	3.02	2.37	2.62	-2.54	0.522	0.00291	Soluble	-2.82	0.274	0.00153	Soluble	-2.02	1.71	0.00953	Soluble	High	Yes	No	No	No	No	No	No	-5.53	0	0	0	0	2	0.55	0	0	1	3.82
ZINC3831531	OC(=O)[C@@H]1CCCN(C1)CCC=C(c1sccc1C)c1sccc1C	C20H25NO2S2	375.55	25	10	0.45	6	3	1	111.63	97.02	3.48	2.65	4.66	3.32	6.41	4.11	-3.74	0.0687	0.000183	Soluble	-4.34	0.0172	4.59e-05	Moderately soluble	-4.94	0.00435	1.16e-05	Moderately soluble	High	No	Yes	No	Yes	Yes	No	No	-6.71	0	0	0	0	0	0.55	0	0	1	3.98
ZINC3833821	OCC(=O)[C@@]1(O)CC[C@@H]2[C@]1(C)C[C@H](O)[C@H]1[C@H]2CCC2=CC(=O)C=C[C@]12C	C21H28O5	360.44	26	0	0.71	2	5	3	97.06	94.83	2.16	1.62	1.56	1.3	2.06	1.74	-2.96	0.392	0.00109	Soluble	-3.22	0.215	0.000597	Soluble	-2.17	2.45	0.00681	Soluble	High	No	Yes	No	No	No	No	No	-7.35	0	0	0	0	0	0.55	0	0	1	5.23
ZINC3842753	OC[C@H]1O[C@H](C[C@@H]1O)n1cc(c(=O)[nH]c1=O)C(F)(F)F	C10H11F3N2O5	296.2	20	6	0.6	3	8	3	58.11	104.55	1.11	-0.46	0.02	-0.04	0.55	0.24	-1.41	11.5	0.0388	Very soluble	-1.27	15.9	0.0538	Very soluble	-0.93	34.6	0.117	Soluble	High	No	No	No	No	No	No	No	-8.43	0	0	0	0	0	0.55	0	0	0	3.71
ZINC3861768	OC[C@H]1O[C@H]([C@@H]([C@@H]1O)O)n1cnc(nc1=O)N	C8H12N4O5	244.2	17	6	0.62	2	7	4	53.64	143.72	-0.39	-2.17	-3.48	-2.98	-2.72	-2.35	-0.12	187	0.765	Very soluble	-0.32	118	0.481	Very soluble	1.38	5900	24.2	Soluble	Low	No	No	No	No	No	No	No	-9.33	0	1	1	1	1	0.55	0	0	1	3.77
ZINC3861806	COc1cc(cc(c1OC)OC)[C@H]1[C@H]2C(=O)OC[C@@H]2[C@H](c2c1cc1OCOc1c2)O	C22H22O8	414.41	30	12	0.41	4	8	1	103.85	92.68	2.97	2.01	2.08	1.43	2.9	2.28	-3.71	0.0812	0.000196	Soluble	-3.58	0.108	0.000261	Soluble	-4.75	0.00734	1.77e-05	Moderately soluble	High	No	No	No	No	No	Yes	Yes	-7.4	0	0	0	0	0	0.55	0	0	1	4.64
ZINC3871701	O=C(Cc1ccccc1)N[C@@H]1C(=O)N2[C@@H]1SC([C@@H]2C(=O)O)(C)C	C16H18N2O4S	334.39	23	6	0.44	5	4	2	89.86	112.01	1.96	1.83	0.48	1.55	1.02	1.37	-2.93	0.394	0.00118	Soluble	-3.8	0.0527	0.000158	Soluble	-2.94	0.388	0.00116	Soluble	High	No	No	No	No	No	No	No	-7.04	0	0	0	0	0	0.56	0	0	0	3.98
ZINC3871703	OC(=O)CCCN1CCC(CC1)O[C@@H](c1ccccn1)c1ccc(cc1)Cl	C21H25ClN2O3	388.89	27	12	0.43	8	5	1	109.52	62.66	3.23	1.03	3.47	2.35	3.91	2.8	-2.7	0.774	0.00199	Soluble	-1.94	4.51	0.0116	Very soluble	-5.96	0.000426	1.1e-06	Moderately soluble	High	Yes	Yes	No	No	No	Yes	Yes	-7.94	0	0	0	0	0	0.55	0	0	2	3.39
ZINC3871960	O=C1[C@@H](NC(=O)/C(=N\OC(C(=O)O)(C)C)/c2csc(n2)N)[C@@H]2N1C(=C(CS2)C[n+]1ccccc1)C(=O)O	C22H23N6O7S2+	547.58	37	11	0.32	10	9	4	138.34	241.93	-2.71	-2.25	-0.34	-0.59	0.24	-1.13	-1.38	23	0.0419	Very soluble	-2.3	2.76	0.00505	Soluble	-2.34	2.51	0.00459	Soluble	Low	No	No	No	No	No	No	No	-11.24	2	2	1	1	2	0.11	0	3	2	5.29
ZINC3871967	OC(=O)C/C=C(\C(=O)N[C@@H]1C(=O)N2[C@@H]1SCC=C2C(=O)O)/c1csc(n1)N	C15H14N4O6S2	410.42	27	5	0.27	7	7	4	101.12	216.46	0.61	-0.3	-0.42	-0.54	-0.15	-0.16	-1.87	5.53	0.0135	Very soluble	-3.79	0.0672	0.000164	Soluble	-0.38	172	0.42	Soluble	Low	No	No	No	No	No	No	No	-9.02	0	1	1	1	1	0.11	0	1	1	4.59
ZINC3872566	OC(=O)C(c1ccc(cc1)[C@@H](CCCN1CCC(CC1)C(c1ccccc1)(c1ccccc1)O)O)(C)C	C32H39NO4	501.66	37	18	0.41	10	5	3	151.59	81	4.03	3.01	4.7	3.86	5.65	4.25	-4.55	0.0143	2.84e-05	Moderately soluble	-4.38	0.0211	4.21e-05	Moderately soluble	-8.1	3.96e-06	7.89e-09	Poorly soluble	High	No	Yes	No	No	No	Yes	No	-7.22	1	3	0	0	0	0.55	0	0	2	4.12
ZINC3872605	NCCO/N=C(/c1ccc(cc1)C(F)(F)F)\CCCCOC	C15H21F3N2O2	318.33	22	6	0.53	10	7	1	78.62	56.84	3.21	2.63	4.35	2.56	4.11	3.37	-3.01	0.309	0.000972	Soluble	-3.47	0.107	0.000336	Soluble	-5.29	0.00161	5.07e-06	Moderately soluble	High	Yes	No	No	Yes	No	Yes	No	-6.37	0	0	0	0	0	0.55	0	2	1	3
ZINC3872738	O=C(Cc1c(Cl)cccc1Cl)N=C(N)N	C9H9Cl2N3O	246.09	15	6	0.11	3	2	2	60.34	81.47	1.27	2.03	1.34	2.11	1.99	1.75	-2.74	0.445	0.00181	Soluble	-3.37	0.105	0.000428	Soluble	-3.36	0.106	0.000433	Soluble	High	No	No	Yes	No	No	No	No	-6.36	0	0	0	0	0	0.55	0	2	1	2.1
ZINC3872952	FC(O[C@@H](C(F)(F)F)Cl)F	C3H2ClF5O	184.49	10	0	1	3	6	0	22.71	9.23	1.38	2.06	4.45	1.71	2.67	2.46	-2.08	1.52	0.00825	Soluble	-1.88	2.42	0.0131	Very soluble	-1.78	3.07	0.0166	Soluble	High	Yes	No	No	No	No	No	No	-5.96	0	2	0	0	3	0.55	0	1	1	2.57
ZINC3873936	Clc1ccc(c(c1)Cl)[C@]1(OC[C@@H](O1)COc1ccc(cc1)N1CCN(CC1)C(C)C)Cn1cncn1	C26H31Cl2N5O3	532.46	36	17	0.46	8	6	0	146.84	64.88	4.38	4.84	3.59	3.36	3.81	4	-6.01	0.000518	9.73e-07	Poorly soluble	-5.94	0.000617	1.16e-06	Moderately soluble	-7.31	2.6e-05	4.89e-08	Poorly soluble	High	Yes	No	No	No	Yes	Yes	Yes	-6.11	1	2	0	0	0	0.55	1	0	3	4.67
ZINC3874185	O[C@@H](c1cc(nc2c1cccc2C(F)(F)F)C(F)(F)F)[C@@H]1CCCCN1	C17H16F6N2O	378.31	26	10	0.47	4	9	2	86.51	45.15	2.78	3.62	6.05	3.43	4.8	4.13	-4.49	0.0123	3.26e-05	Moderately soluble	-4.26	0.021	5.55e-05	Moderately soluble	-6.1	0.000303	8.02e-07	Poorly soluble	High	No	Yes	No	No	No	Yes	Yes	-6.04	0	1	0	1	0	0.55	0	0	2	3.25
ZINC3874950	CCC[C@H](C1(CC=C)C(=O)NC(=O)NC1=O)C	C12H18N2O3	238.28	17	0	0.58	5	3	2	71.37	75.27	1.87	1.97	0.59	1.12	2.08	1.53	-2.23	1.41	0.00591	Soluble	-3.18	0.159	0.000667	Soluble	-3.24	0.138	0.000578	Soluble	High	No	No	No	No	No	No	No	-6.35	0	0	0	0	0	0.55	0	2	1	2.78
ZINC3875334	CC(=O)OCC(=O)[C@@]1(O)CC[C@@H]2[C@]1(C)CC(=O)[C@H]1[C@H]2CCC2=CC(=O)CC[C@]12C	C23H30O6	402.48	29	0	0.74	4	6	1	106.31	97.74	2.7	2.1	2.56	1.64	3.55	2.51	-3.39	0.162	0.000403	Soluble	-3.78	0.0663	0.000165	Soluble	-3.95	0.0454	0.000113	Soluble	High	No	Yes	No	No	No	No	No	-7.26	0	0	0	0	0	0.55	1	0	1	5.09
ZINC3875392	COc1cc2c(cc1OC)CCN1[C@H]2CC(=O)[C@@H](C1)CC(C)C	C19H27NO3	317.42	23	6	0.63	4	4	0	95.4	38.77	3.47	2.95	2.53	2.21	3.54	2.94	-3.6	0.0806	0.000254	Soluble	-3.43	0.119	0.000374	Soluble	-4.56	0.00866	2.73e-05	Moderately soluble	High	Yes	No	No	No	No	Yes	No	-6.14	0	0	0	0	0	0.55	0	0	0	3.66
ZINC3875393	COc1cc2c(cc1OC)CCN1[C@H]2CC(=O)[C@H](C1)CC(C)C	C19H27NO3	317.42	23	6	0.63	4	4	0	95.4	38.77	3.4	2.95	2.53	2.21	3.54	2.93	-3.6	0.0806	0.000254	Soluble	-3.43	0.119	0.000374	Soluble	-4.56	0.00866	2.73e-05	Moderately soluble	High	Yes	No	No	No	No	Yes	No	-6.14	0	0	0	0	0	0.55	0	0	0	3.66
ZINC3875483	O=C1CC[C@@]2([C@@]34[C@H]1Oc1c4c(C[C@H]2N(CC3)C)ccc1O)O	C17H19NO4	301.34	22	6	0.59	0	5	2	82.98	70	2.11	0.83	0.36	0.91	1.82	1.21	-2.43	1.11	0.00369	Soluble	-1.88	3.95	0.0131	Very soluble	-2.87	0.409	0.00136	Soluble	High	No	Yes	No	No	No	Yes	No	-7.55	0	0	0	0	0	0.55	0	0	0	4.46
ZINC3875484	O=C1CC[C@]2(C(=C1)CC[C@@H]1[C@]2(F)[C@@H](O)C[C@]2([C@H]1CC[C@]2(C)O)C)C	C20H29FO3	336.44	24	0	0.85	0	4	2	91.45	57.53	2.62	2.13	3.75	3.05	3.55	3.02	-3.27	0.182	0.00054	Soluble	-2.97	0.361	0.00107	Soluble	-3.76	0.0587	0.000175	Soluble	High	Yes	Yes	No	No	No	No	No	-6.84	0	0	0	0	0	0.55	0	0	0	5.09
ZINC3875560	OCC(=O)[C@@]1(O)CC[C@@H]2[C@]1(C)C[C@H](O)[C@H]1[C@H]2C[C@@H](C2=CC(=O)C=C[C@]12C)C	C22H30O5	374.47	27	0	0.73	2	5	3	101.87	94.83	2.39	1.95	1.8	1.52	2.18	1.97	-3.26	0.207	0.000552	Soluble	-3.57	0.102	0.000272	Soluble	-2.31	1.82	0.00486	Soluble	High	No	Yes	No	No	No	No	No	-7.2	0	0	0	0	0	0.55	0	0	1	5.42
ZINC3875980	CCOc1ccc2c(c1C(=O)N[C@@H]1C(=O)N3[C@@H]1SC([C@@H]3C(=O)O)(C)C)cccc2	C21H22N2O5S	414.47	29	10	0.38	6	5	2	114.08	121.24	2.39	2.87	2.1	2.25	2.15	2.35	-4.08	0.0347	8.37e-05	Moderately soluble	-5.08	0.00348	8.41e-06	Moderately soluble	-4.68	0.00872	2.1e-05	Moderately soluble	High	No	Yes	No	Yes	Yes	Yes	Yes	-6.79	0	0	0	0	0	0.56	0	0	1	4.29
ZINC3876023	C#C[C@@]1(CC[C@@H]2[C@]1(C)CC[C@H]1[C@H]2CCC2=C[C@H](CC[C@H]12)OC(=O)C)OC(=O)C	C24H32O4	384.51	28	0	0.75	4	4	0	109.06	52.6	4.21	4.3	4.51	4.4	4.14	4.31	-4.67	0.00824	2.14e-05	Moderately soluble	-5.12	0.00293	7.62e-06	Moderately soluble	-3.73	0.0718	0.000187	Soluble	High	Yes	No	No	No	Yes	No	Yes	-5.59	1	0	0	0	0	0.55	0	3	2	5.6
ZINC3876068	CCC#C[C@@H]([C@]1(CC=C)C(=O)NC(=O)N(C1=O)C)C	C14H18N2O3	262.3	19	0	0.5	3	3	1	79.24	66.48	2.43	2.29	0.62	1.57	2.1	1.8	-2.71	0.51	0.00195	Soluble	-3.32	0.125	0.000475	Soluble	-2.58	0.684	0.00261	Soluble	High	No	No	No	No	Yes	No	No	-6.27	0	0	0	0	0	0.55	0	3	0	3.74
ZINC3876136	OCC(=O)[C@@]1(O)[C@@H](C)C[C@@H]2[C@]1(C)C[C@H](O)[C@]1([C@H]2CCC2=CC(=O)C=C[C@]12C)F	C22H29FO5	392.46	28	0	0.73	2	6	3	101.96	94.83	2.23	1.94	2.32	1.62	2.58	2.14	-3.36	0.17	0.000433	Soluble	-3.56	0.109	0.000278	Soluble	-2.8	0.625	0.00159	Soluble	High	No	Yes	No	No	No	No	No	-7.32	0	0	0	0	0	0.55	0	0	1	5.47
ZINC3882036	OCC(=O)[C@@]1(O)[C@H](O)C[C@@H]2[C@]1(C)C[C@H](O)[C@]1([C@H]2CCC2=CC(=O)C=C[C@]12C)F	C21H27FO6	394.43	28	0	0.71	2	7	4	98.31	115.06	1.68	1.16	1.04	0.59	1.58	1.21	-2.88	0.515	0.00131	Soluble	-3.17	0.266	0.000674	Soluble	-1.83	5.78	0.0147	Soluble	High	No	Yes	No	No	No	No	No	-7.88	0	0	0	0	0	0.55	0	0	1	5.46
ZINC3914596	NC(=O)C[C@@H](C(=O)N[C@H]([C@@H](CN1C[C@H]2CCCC[C@H]2C[C@H]1C(=O)NC(C)(C)C)O)Cc1ccccc1)NC(=O)c1ccc2c(n1)cccc2	C38H50N6O5	670.84	49	16	0.5	16	7	5	192.87	166.75	2.15	4.24	2.71	1.4	3.84	2.87	-5.86	0.000934	1.39e-06	Moderately soluble	-7.45	2.36e-05	3.53e-08	Poorly soluble	-8.54	1.91e-06	2.85e-09	Poorly soluble	Low	No	Yes	No	No	No	No	Yes	-7.38	2	3	2	1	3	0.17	0	0	3	5.94
ZINC3914809	O[C@@H]1CC[C@]2([C@@H](C1)C[C@@H]([C@@H]1[C@@H]2CC[C@]2([C@H]1CC[C@@H]2[C@@H](CCC(=O)O)C)C)O)C	C24H40O4	392.57	28	0	0.96	4	4	3	112.6	77.76	3.11	3.08	4.48	3.88	3.42	3.59	-3.95	0.044	0.000112	Soluble	-4.38	0.0164	4.17e-05	Moderately soluble	-3.13	0.29	0.00074	Soluble	High	No	Yes	No	No	No	No	No	-6.51	0	0	0	0	0	0.56	0	0	1	4.93
ZINC3915154	O=C(C(C)C)OCC(=O)[C@@]12O[C@@H](O[C@@H]1C[C@@H]1[C@]2(C)C[C@H](O)[C@H]2[C@H]1CCC1=CC(=O)C=C[C@]21C)C1CCCCC1	C32H44O7	540.69	39	0	0.78	6	7	1	146.84	99.13	4.78	5.28	4.7	3.04	4.41	4.44	-6.12	0.000408	7.54e-07	Poorly soluble	-7.11	4.18e-05	7.73e-08	Poorly soluble	-4.38	0.0226	4.19e-05	Moderately soluble	High	No	Yes	No	No	Yes	No	No	-5.85	1	3	0	0	1	0.55	0	0	2	6.67
ZINC3920027	FCSC(=O)[C@@]1(OC(=O)CC)[C@H](C)C[C@@H]2[C@]1(C)C[C@H](O)[C@]1([C@H]2C[C@@H](C2=CC(=O)C=C[C@]12C)F)F	C25H31F3O5S	500.57	34	0	0.72	6	8	1	123.03	105.97	3.47	3.96	5.69	3.18	4.52	4.16	-5.04	0.00454	9.07e-06	Moderately soluble	-5.89	0.000651	1.3e-06	Moderately soluble	-4.76	0.0087	1.74e-05	Moderately soluble	Low	No	Yes	No	No	No	No	Yes	-6.54	1	2	0	0	0	0.55	0	1	2	5.95
ZINC3920266	O[C@H]1[C@@H](N)C[C@@H](O[C@H]1C)O[C@H]1C[C@@](O)(Cc2c1c(O)c1c(c2O)C(=O)c2c(C1=O)cccc2)C(=O)C	C26H27NO9	497.49	36	12	0.42	3	10	5	125.01	176.61	2.49	1.86	0.7	-1.05	1.69	1.14	-4.14	0.0356	7.16e-05	Moderately soluble	-5.19	0.00321	6.45e-06	Moderately soluble	-3.95	0.0563	0.000113	Soluble	Low	No	Yes	No	No	No	No	No	-8.01	0	1	1	1	1	0.55	1	1	1	5.63
ZINC3926298	O=[S@](CCCC(C(F)(F)F)(F)F)CCCCCCCCC[C@@H]1Cc2cc(O)ccc2[C@@H]2[C@@H]1[C@@H]1CC[C@@H]([C@]1(CC2)C)O	C32H47F5O3S	606.77	41	6	0.81	15	8	2	156.93	76.74	5.24	9.22	11.65	5.93	8.22	8.05	-8.53	1.8e-06	2.96e-09	Poorly soluble	-10.73	1.13e-08	1.86e-11	Insoluble	-9.58	1.61e-07	2.65e-10	Poorly soluble	Low	No	Yes	No	No	No	No	Yes	-3.46	2	4	1	1	2	0.17	0	1	3	5.98
ZINC3927200	O=C1CC[C@]2(C(=C1)[C@@H]1C[C@@H]1[C@@H]1[C@@H]2CC[C@]2([C@H]1[C@@H]1C[C@@H]1[C@]12CCC(=O)O1)C)C	C24H30O3	366.49	27	0	0.83	0	3	0	103.21	43.37	3.07	2.47	4.31	4.53	4.12	3.7	-3.67	0.0787	0.000215	Soluble	-3.03	0.346	0.000944	Soluble	-4.31	0.0178	4.86e-05	Moderately soluble	High	Yes	No	No	No	No	No	No	-6.78	1	0	0	0	0	0.55	0	0	1	5.63
ZINC3927870	O[C@H]1[C@H](O)[C@H](O[C@H]1n1cnc2c1nc(F)nc2N)COP(=O)(O)O	C10H13FN5O7P	365.21	24	9	0.5	4	11	5	73.54	195.88	0.12	-2.45	-1.62	-2.24	-3.08	-1.86	-0.57	97.3	0.266	Very soluble	-1.12	27.6	0.0755	Very soluble	1	3640	9.95	Soluble	Low	No	No	No	No	No	No	No	-10.27	1	1	1	1	3	0.11	0	1	1	4.43
ZINC3929508	CCOC(=O)C1=C[C@H]([C@@H]([C@H](C1)N)NC(=O)C)OC(CC)CC	C16H28N2O4	312.4	22	0	0.75	9	5	2	84.52	90.65	2.56	1.1	1.29	0.63	1.33	1.38	-1.88	4.16	0.0133	Very soluble	-2.6	0.791	0.00253	Soluble	-2.47	1.05	0.00337	Soluble	High	No	Yes	No	No	No	No	No	-7.42	0	0	0	0	0	0.55	0	0	1	4.44
ZINC3938746	COc1ccc2c(c1)[nH]c1c2CCN2[C@@H]1C[C@H]1[C@@H](C2)C[C@H]([C@@H]([C@H]1C(=O)OC)OC)OC(=O)c1cc(OC)c(c(c1)OC)OC	C33H40N2O9	608.68	44	15	0.52	10	10	1	165.52	117.78	5.21	4.04	3.47	1.75	3.94	3.68	-5.75	0.00108	1.77e-06	Moderately soluble	-6.22	0.000369	6.07e-07	Poorly soluble	-6.89	7.81e-05	1.28e-07	Poorly soluble	High	No	Yes	No	No	No	No	No	-7.14	2	3	0	0	1	0.17	1	1	3	5.92
ZINC3943279	CCCCCCOC(=O)/N=C(/c1ccc(cc1)NCc1nc2c(n1C)ccc(c2)C(=O)N(c1ccccn1)CCC(=O)OCC)\N	C34H41N7O5	627.73	46	21	0.35	19	8	2	178.89	154.03	4.98	5.65	5.26	3.27	4.87	4.81	-6.38	0.000265	4.21e-07	Poorly soluble	-8.65	1.41e-06	2.24e-09	Poorly soluble	-9.66	1.37e-07	2.18e-10	Poorly soluble	Low	No	Yes	No	No	Yes	Yes	Yes	-6.12	2	3	2	1	4	0.17	0	3	3	4.72
ZINC3953037	COCCCN1C[C@H](NCC)c2c(S1(=O)=O)sc(c2)S(=O)(=O)N	C12H21N3O5S3	383.51	23	5	0.67	7	8	2	90.8	163.8	1.67	-0.26	1.54	-1.36	0.08	0.34	-1.75	6.78	0.0177	Very soluble	-2.72	0.729	0.0019	Soluble	-2.94	0.443	0.00116	Soluble	Low	No	Yes	No	Yes	No	No	No	-8.82	0	0	1	1	1	0.55	0	0	1	4.28
ZINC3964325	CCN(CCNC(=O)c1c(C)[nH]c(c1C)/C=C/1\C(=O)Nc2c1cc(F)cc2)CC	C22H27FN4O2	398.47	29	11	0.36	8	4	3	116.31	77.23	3.55	2.63	3.07	2.06	4.77	3.22	-3.72	0.0759	0.00019	Soluble	-3.9	0.0499	0.000125	Soluble	-7.35	1.76e-05	4.43e-08	Poorly soluble	High	Yes	Yes	No	Yes	No	Yes	Yes	-6.86	0	0	0	0	0	0.55	0	1	2	3.58
ZINC3977737	OC[C@H]1O[C@H](O)[C@@H]([C@H]([C@@H]1O)O)NC(=O)N(N=O)C	C8H15N3O7	265.22	18	0	0.88	5	8	5	55.21	151.92	0.81	-0.89	-2.89	-2.61	-3.47	-1.81	-0.59	67.6	0.255	Very soluble	-1.82	4.03	0.0152	Very soluble	2.36	60800	229	Soluble	Low	No	Yes	No	No	No	No	No	-8.55	0	1	1	1	1	0.55	0	1	0	4.13
ZINC3977767	CCC(=O)O[C@@]1([C@@H](C)C[C@@H]2[C@]1(C)C[C@H](O)[C@]1([C@H]2CCC2=CC(=O)C=C[C@]12C)F)C(=O)CCl	C25H32ClFO5	466.97	32	0	0.72	5	6	1	120.13	80.67	3.16	3.83	4.52	3.18	4.61	3.86	-4.82	0.0071	1.52e-05	Moderately soluble	-5.22	0.00282	6.03e-06	Moderately soluble	-4.97	0.00496	1.06e-05	Moderately soluble	High	No	Yes	No	No	No	No	Yes	-6.43	0	0	0	0	0	0.55	0	1	2	5.65
ZINC3977777	CC(=O)OCC(=O)[C@@]12OC3(O[C@@H]1C[C@@H]1[C@]2(C)C[C@H](O)[C@]2([C@H]1CCC1=CC(=O)C=C[C@]21C)F)CCCC3	C28H35FO7	502.57	36	0	0.75	4	8	1	127.74	99.13	4.41	3.57	3.94	2.37	3.84	3.63	-4.94	0.00576	1.15e-05	Moderately soluble	-5.34	0.00231	4.6e-06	Moderately soluble	-4.38	0.0211	4.2e-05	Moderately soluble	High	No	Yes	No	No	No	No	No	-6.83	1	2	0	0	0	0.55	0	0	2	6.58
ZINC3977952	OC[C@H]1O[C@]([C@H]([C@@H]1O[C@@H]1O[C@H](CO)[C@@H]([C@@H]([C@H]1O)O)O)O)(O)CO	C12H22O11	342.3	23	0	1	5	11	8	68.16	189.53	0.36	-4.25	-5.4	-4.37	-3.86	-3.5	1.05	3800	11.1	Highly soluble	0.88	2590	7.57	Highly soluble	3.67	1620000	4730	Soluble	Low	No	Yes	No	No	No	No	No	-11.41	2	1	1	1	4	0.17	0	0	0	5.29
ZINC3978005	CN1C[C@@H](C[C@H]2[C@H]1Cc1c[nH]c3c1c2ccc3)C(=O)N[C@]1(C)O[C@@]2(N(C1=O)[C@@H](Cc1ccccc1)C(=O)N1[C@H]2CCC1)O	C33H37N5O5	583.68	43	15	0.48	5	6	3	170.02	118.21	3.45	2.37	0.94	1.91	2.1	2.15	-4.88	0.00769	1.32e-05	Moderately soluble	-4.49	0.0188	3.21e-05	Moderately soluble	-6.63	0.000138	2.37e-07	Poorly soluble	High	No	Yes	No	No	No	Yes	Yes	-8.18	1	3	0	0	1	0.55	0	0	1	5.91
ZINC3978006	OC(=O)[C@@H]1N2C(=O)[C@H]([C@H]2SC1(C)C)NC(=O)c1c(C)onc1c1c(Cl)cccc1Cl	C19H17Cl2N3O5S	470.33	30	11	0.37	5	6	2	115.75	138.04	2.42	2.91	2.82	2.55	2.89	2.72	-4.53	0.0139	2.95e-05	Moderately soluble	-5.47	0.00159	3.39e-06	Moderately soluble	-5.39	0.00191	4.06e-06	Moderately soluble	Low	No	Yes	No	Yes	No	No	Yes	-7.1	0	0	0	1	0	0.56	0	0	1	4.63
ZINC3978028	CCC[C@H]1CN([C@@H](C1)C(=O)N[C@@H]([C@H]1O[C@H](SC)[C@@H]([C@H]([C@H]1O)O)O)[C@H](Cl)C)C	C18H33ClN2O5S	424.98	27	0	0.94	8	6	4	111.18	127.56	2.6	2.16	0.01	-0.06	0.65	1.07	-3.31	0.209	0.000492	Soluble	-4.47	0.0144	3.38e-05	Moderately soluble	-1.2	26.9	0.0634	Soluble	High	No	Yes	No	No	No	No	No	-7.36	0	0	0	0	0	0.55	0	1	2	5.58
ZINC3993855	O=C1N(C)CC(=O)N2[C@@H]1Cc1c([C@H]2c2ccc3c(c2)OCO3)[nH]c2c1cccc2	C22H19N3O4	389.4	29	15	0.27	1	4	1	112.61	74.87	2.81	2.29	1.13	1.45	2.59	2.05	-4.01	0.0377	9.69e-05	Soluble	-3.5	0.123	0.000316	Soluble	-5.52	0.00117	3.01e-06	Moderately soluble	High	Yes	Yes	No	No	No	No	No	-7.05	0	0	0	0	0	0.55	0	0	1	3.82
ZINC3995809	O=[S@@](CCCC(C(F)(F)F)(F)F)CCCCCCCCC[C@@H]1Cc2cc(O)ccc2[C@@H]2[C@@H]1[C@@H]1CC[C@@H]([C@]1(CC2)C)O	C32H47F5O3S	606.77	41	6	0.81	15	8	2	156.93	76.74	5.33	9.22	11.65	5.93	8.22	8.07	-8.53	1.8e-06	2.96e-09	Poorly soluble	-10.73	1.13e-08	1.86e-11	Insoluble	-9.58	1.61e-07	2.65e-10	Poorly soluble	Low	No	Yes	No	No	No	No	Yes	-3.46	2	4	1	1	2	0.17	0	1	3	5.98
ZINC4095858	C[C@@H](CCC[C@]1(C)CCc2c(O1)c(C)c(c(c2C)O)C)CCC[C@@H](CCCC(C)C)C	C29H50O2	430.71	31	6	0.79	12	2	1	139.27	29.46	6.04	10.7	8.84	6.14	9.75	8.29	-8.6	1.08e-06	2.5e-09	Poorly soluble	-11.27	2.3e-09	5.33e-12	Insoluble	-9.16	2.97e-07	6.89e-10	Poorly soluble	Low	No	Yes	No	No	No	No	No	-1.33	1	3	1	1	1	0.55	0	0	3	5.17
ZINC4097283	CCC[C@H]1CN([C@H](C1)C(=O)N[C@@H]([C@H]1O[C@H](SC)[C@@H]([C@H]([C@H]1O)O)O)[C@H](O)C)C	C18H34N2O6S	406.54	27	0	0.94	8	7	5	107.55	147.79	2.78	0.2	-1.24	-1.08	-0.47	0.04	-1.96	4.47	0.011	Very soluble	-2.86	0.558	0.00137	Soluble	-0.02	385	0.946	Soluble	Low	No	Yes	No	No	No	No	No	-8.64	0	1	1	1	0	0.55	0	0	2	5.54
ZINC4097286	CCC[C@H]1O[C@H]2[C@](O1)(C(=O)CO)[C@@]1([C@@H](C2)[C@@H]2CCC3=CC(=O)C=C[C@@]3([C@H]2[C@H](C1)O)C)C	C25H34O6	430.53	31	0	0.76	4	6	2	115.18	93.06	3.63	2.55	2.72	1.74	2.91	2.71	-3.85	0.0606	0.000141	Soluble	-4.15	0.0304	7.05e-05	Moderately soluble	-3.17	0.29	0.000673	Soluble	High	No	Yes	No	No	No	No	No	-7.12	0	0	0	0	0	0.55	0	0	1	6.09
ZINC4097304	OCC(=O)[C@@]1(O)CC[C@@H]2[C@]1(C)C[C@H](O)[C@]1([C@H]2CCC2=CC(=O)CC[C@]12C)F	C21H29FO5	380.45	27	0	0.81	2	6	3	97.62	94.83	1.89	1.67	2.29	1.5	2.87	2.05	-3.12	0.289	0.000761	Soluble	-3.28	0.202	0.00053	Soluble	-3.12	0.289	0.00076	Soluble	High	No	Yes	No	No	No	No	No	-7.44	0	0	0	0	0	0.55	0	0	1	5.25
ZINC4097305	OCC(=O)[C@@]12OC(O[C@@H]1C[C@@H]1[C@]2(C)C[C@H](O)[C@H]2[C@H]1C[C@@H](C1=CC(=O)C=C[C@]21C)F)(C)C	C24H31FO6	434.5	31	0	0.75	2	7	2	110.46	93.06	2.73	2.51	2.69	1.64	2.63	2.44	-3.98	0.0452	0.000104	Soluble	-4.11	0.0337	7.76e-05	Moderately soluble	-3.01	0.421	0.000968	Soluble	High	No	Yes	No	No	No	No	No	-7.17	0	0	0	0	0	0.55	0	0	1	5.94
ZINC4097308	OCC(=O)[C@@]12OC(O[C@@H]1C[C@@H]1[C@]2(C)C[C@H](O)[C@H]2[C@H]1C[C@@H](C1=CC(=O)CC[C@]21C)F)(C)C	C24H33FO6	436.51	31	0	0.83	2	7	2	110.94	93.06	2.84	1.38	2.92	1.73	3.03	2.38	-3.28	0.227	0.00052	Soluble	-2.94	0.504	0.00115	Soluble	-3.48	0.145	0.000331	Soluble	High	No	Yes	No	No	No	No	No	-7.98	0	0	0	0	0	0.55	0	0	1	5.91
ZINC4097310	CCC(=O)O[C@@H](C(C)C)O[P@@](=O)(CC(=O)N1C[C@@H](C[C@H]1C(=O)O)C1CCCCC1)CCCCc1ccccc1	C30H46NO7P	563.66	39	6	0.7	16	7	1	157.56	120.02	3.76	6.24	5.74	3.74	4.76	4.85	-6.32	0.000267	4.75e-07	Poorly soluble	-8.55	1.6e-06	2.84e-09	Poorly soluble	-6.02	0.000538	9.55e-07	Poorly soluble	Low	No	Yes	No	No	Yes	No	Yes	-5.31	1	4	1	0	2	0.56	0	2	3	6.19
ZINC4097343	CC[C@H](n1ncn(c1=O)c1ccc(cc1)N1CCN(CC1)c1ccc(cc1)OC[C@H]1CO[C@](O1)(Cn1cncn1)c1ccc(cc1Cl)Cl)C	C35H38Cl2N8O4	705.63	49	28	0.37	11	7	0	194.53	104.7	5.47	5.66	4.71	4.21	3.7	4.75	-7.48	2.35e-05	3.33e-08	Poorly soluble	-7.62	1.68e-05	2.38e-08	Poorly soluble	-9.24	4.1e-07	5.81e-10	Poorly soluble	High	No	Yes	Yes	Yes	Yes	Yes	Yes	-6.59	3	3	1	0	2	0.17	2	0	3	5.77
ZINC4097392	FC(O[C@@H](C(F)(F)F)F)F	C3H2F6O	168.04	10	0	1	3	7	0	17.96	9.23	1.38	2.65	4.6	1.53	2.45	2.52	-2.35	0.745	0.00443	Soluble	-2.49	0.538	0.0032	Soluble	-1.44	6.17	0.0367	Soluble	High	Yes	No	No	No	No	No	No	-5.44	0	2	0	0	3	0.55	0	0	1	2.07
ZINC4097404	CC(=O)O[C@H]1C[C@@H]2CC[C@@H]3[C@@H]([C@]2(C[C@@H]1N1CCCCC1)C)CC[C@]1([C@H]3C[C@@H]([C@@H]1OC(=O)C)[N+]1(C)CCCCC1)C	C34H57N2O4+	557.83	40	0	0.94	6	5	0	169.6	55.84	1.87	6.53	5.2	1.2	1.9	3.34	-7.02	5.37e-05	9.63e-08	Poorly soluble	-7.5	1.76e-05	3.16e-08	Poorly soluble	-5.96	0.000607	1.09e-06	Moderately soluble	High	Yes	Yes	No	No	No	No	No	-5.07	1	3	0	0	1	0.55	0	2	2	6.05
ZINC4097426	OCCN1C[C@H](O)[C@H]([C@@H]([C@H]1CO)O)O	C8H17NO5	207.22	14	0	1	3	6	5	51.08	104.39	1.16	-2.57	-3.64	-2.47	-2.15	-1.94	0.69	1020	4.92	Highly soluble	0.92	1740	8.38	Highly soluble	1.97	19400	93.5	Soluble	Low	No	Yes	No	No	No	No	No	-9.39	0	1	0	0	1	0.55	0	0	1	3.17
ZINC4097476	CC(=O)Nc1c(I)c(NC(=O)C)c(c(c1I)C(=O)O)I	C11H9I3N2O4	613.91	20	6	0.18	5	4	3	100.18	95.5	1.56	1.75	2.73	2.75	3.48	2.46	-4.64	0.014	2.29e-05	Moderately soluble	-3.37	0.26	0.000424	Soluble	-5.08	0.00515	8.39e-06	Moderately soluble	High	No	No	No	Yes	No	No	No	-8.8	1	1	0	0	1	0.56	0	1	1	2.46
ZINC4099009	COc1cc(cc(c1O)OC)[C@H]1[C@H]2C(=O)OC[C@@H]2[C@@H](c2c1cc1OCOc1c2)O[C@@H]1O[C@@H]2CO[C@H](O[C@H]2[C@@H]([C@H]1O)O)c1cccs1	C32H32O13S	656.65	46	17	0.47	6	13	3	156.66	189.07	3.34	1.24	2.1	0.51	2.56	1.95	-4.57	0.0177	2.69e-05	Moderately soluble	-4.81	0.0102	1.55e-05	Moderately soluble	-4.49	0.0213	3.24e-05	Moderately soluble	Low	No	Yes	No	No	No	Yes	No	-9.43	2	3	1	1	4	0.17	0	0	1	6.48
ZINC4099200	COc1c(OC)ccnc1C[S@](=O)c1nc2c([nH]1)cc(cc2)OC(F)F	C16H15F2N3O4S	383.37	26	15	0.25	7	8	1	90.36	105.54	2.78	2.37	4.44	0.38	2.62	2.52	-3.67	0.081	0.000211	Soluble	-4.23	0.0227	5.93e-05	Moderately soluble	-6.02	0.000369	9.62e-07	Poorly soluble	High	No	No	Yes	Yes	Yes	Yes	Yes	-6.96	0	0	0	0	0	0.55	0	0	1	3.68
ZINC4212854	OCC(=O)[C@H]1[C@H](C)C[C@@H]2[C@]1(C)C[C@H](O)[C@]1([C@H]2CCC2=CC(=O)C=C[C@]12C)F	C22H29FO4	376.46	27	0	0.73	2	5	2	100.76	74.6	2.39	2.35	3.2	2.45	3.08	2.69	-3.52	0.113	0.0003	Soluble	-3.56	0.105	0.000278	Soluble	-3.17	0.257	0.000682	Soluble	High	Yes	Yes	No	No	No	No	No	-6.93	0	0	0	0	0	0.55	0	0	1	5.38
ZINC4228257	C[C@@H]([C@H]([C@@H]1CNc2c(N1)c(=O)[nH]c(n2)N)O)O	C9H15N5O3	241.25	17	6	0.56	2	4	6	68.37	136.29	0.64	-1.94	-2.84	-1.35	-0.97	-1.29	-0.24	138	0.572	Very soluble	-0.4	96	0.398	Very soluble	-0.97	26.1	0.108	Soluble	Low	No	No	No	No	No	No	No	-9.15	1	1	0	1	1	0.55	0	0	1	3.75
ZINC4258316	Cn1cnc(c1Sc1ncnc2c1[nH]cn2)[N+](=O)[O-]	C9H7N7O2S	277.26	19	14	0.11	3	6	1	68.12	143.4	0.34	0.1	1.15	-0.26	-1.11	0.04	-1.97	2.98	0.0107	Very soluble	-2.67	0.598	0.00216	Soluble	-2.57	0.741	0.00267	Soluble	Low	No	No	No	No	No	No	No	-7.92	0	0	1	1	0	0.55	0	2	0	2.9
ZINC4474405	CCNC(=O)CCC/C=C\C[C@H]1[C@@H](O)C[C@H]([C@@H]1/C=C/[C@H](CCc1ccccc1)O)O	C25H37NO4	415.57	30	6	0.56	13	4	4	121.36	89.79	3.88	2.82	3.15	2.39	4.37	3.32	-3.48	0.137	0.000329	Soluble	-4.36	0.018	4.33e-05	Moderately soluble	-4.5	0.0133	3.19e-05	Moderately soluble	High	No	Yes	No	No	No	No	No	-6.83	0	0	1	0	0	0.55	0	1	2	4.6
ZINC4474460	CC(CCC[C@H]([C@H]1CC[C@@H]2[C@]1(C)CCC/C/2=C\C=C/1\C[C@@H](O)CCC1=C)C)C	C27H44O	384.64	28	0	0.78	6	1	1	125.04	20.23	3.88	2.82	7.62	2.39	4.37	3.32	-3.48	0.137	0.000329	Soluble	-4.36	0.018	4.33e-05	Moderately soluble	-4.5	0.0133	3.19e-05	Moderately soluble	High	No	Yes	No	No	No	No	No	-6.83	0	0	1	0	0	0.55	0	1	2	4.6
ZINC4474603	CC/C=C\C/C=C\C/C=C\C/C=C\C/C=C\CCCC(=O)O	C20H30O2	302.45	22	0	0.45	13	2	1	97.66	37.3	3.88	2.82	5.99	2.39	4.37	3.32	-3.48	0.137	0.000329	Soluble	-4.36	0.018	4.33e-05	Moderately soluble	-4.5	0.0133	3.19e-05	Moderately soluble	High	No	Yes	No	No	No	No	No	-6.83	0	0	1	0	0	0.55	0	1	2	4.6
ZINC4632106	Cc1cccc(c1C)[C@@H](c1cnc[nH]1)C	C13H16N2	200.28	15	11	0.31	2	1	1	62.78	28.68	2.01	3.08	3.18	2.2	4.01	2.9	-3.43	0.0739	0.000369	Soluble	-3.35	0.0895	0.000447	Soluble	-4.97	0.00216	1.08e-05	Moderately soluble	High	Yes	No	No	No	No	No	No	-5.33	0	0	0	0	0	0.55	0	0	1	2.51
ZINC4658290	S=c1[nH]cnc2c1[nH]cn2	C5H4N4S	152.18	10	9	0	0	2	2	39.07	89.45	0.19	0.11	1.02	-0.75	2.78	0.67	-1.52	4.61	0.0303	Very soluble	-1.54	4.35	0.0286	Very soluble	-2.26	0.838	0.00551	Soluble	High	No	No	No	No	No	No	No	-7.15	0	3	0	0	1	0.55	0	1	1	1.72
ZINC4658553	C[C@@H](C(=O)O)N	C3H7NO2	89.09	6	0	0.67	1	3	2	21.01	63.32	0.34	-2.96	-0.58	-3.06	-1.04	-1.46	1.54	3080	34.5	Highly soluble	2.19	13800	155	Highly soluble	0.77	523	5.87	Soluble	High	No	No	No	No	No	No	No	-8.95	0	4	0	0	3	0.55	0	0	1	1
ZINC4658560	OC(=O)[C@@H](O)C	C3H6O3	90.08	6	0	0.67	1	3	2	19.47	57.53	-0.02	-0.72	-0.55	-0.85	-0.8	-0.59	0.12	119	1.32	Highly soluble	-0.01	87.6	0.972	Very soluble	0.98	866	9.62	Soluble	High	No	No	No	No	No	No	No	-7.36	0	4	0	0	2	0.85	0	0	1	1.29
ZINC4658562	OC(=O)[C@H](O)C	C3H6O3	90.08	6	0	0.67	1	3	2	19.47	57.53	0.47	-0.72	-0.55	-0.85	-0.8	-0.49	0.12	119	1.32	Highly soluble	-0.01	87.6	0.972	Very soluble	0.98	866	9.62	Soluble	High	No	No	No	No	No	No	No	-7.36	0	4	0	0	2	0.85	0	0	1	1.29
ZINC4658603	CC(=O)NO	C2H5NO2	75.07	5	0	0.5	1	2	2	15.46	49.33	0.63	-1.59	-0.49	-0.96	-0.98	-0.68	0.76	434	5.78	Highly soluble	1.06	867	11.6	Highly soluble	0.44	206	2.75	Soluble	High	No	No	No	No	No	No	No	-7.89	0	4	0	0	2	0.55	0	2	1	1.3
ZINC4676424	COc1c(OC)ccnc1C[S@@](=O)c1nc2c([nH]1)cc(cc2)OC(F)F	C16H15F2N3O4S	383.37	26	15	0.25	7	8	1	90.36	105.54	1.67	2.37	4.44	0.38	2.62	2.3	-3.67	0.081	0.000211	Soluble	-4.23	0.0227	5.93e-05	Moderately soluble	-6.02	0.000369	9.62e-07	Poorly soluble	High	No	Yes	Yes	Yes	Yes	Yes	Yes	-6.96	0	0	0	0	0	0.55	0	0	1	3.68
ZINC4693574	COc1ccc2c(c1)[nH]c(n2)[S@](=O)Cc1ncc(c(c1C)OC)C	C17H19N3O3S	345.42	24	15	0.29	5	5	1	93.7	96.31	2.56	2.23	3.61	0.91	3.16	2.5	-3.52	0.105	0.000303	Soluble	-3.89	0.0447	0.000129	Soluble	-6.47	0.000117	3.37e-07	Poorly soluble	High	No	Yes	Yes	Yes	Yes	Yes	Yes	-6.82	0	0	0	0	0	0.55	0	0	0	3.58
ZINC4693575	COc1ccc2c(c1)[nH]c(n2)[S@@](=O)Cc1ncc(c(c1C)OC)C	C17H19N3O3S	345.42	24	15	0.29	5	5	1	93.7	96.31	1.64	2.23	3.61	0.91	3.16	2.31	-3.52	0.105	0.000303	Soluble	-3.89	0.0447	0.000129	Soluble	-6.47	0.000117	3.37e-07	Poorly soluble	High	No	Yes	Yes	Yes	No	Yes	Yes	-6.82	0	0	0	0	0	0.55	0	0	0	3.58
ZINC5162311	NC(=O)Cc1cccc(c1N)C(=O)c1ccccc1	C15H14N2O2	254.28	19	12	0.07	4	2	2	73.4	86.18	1.39	1.95	1.54	1.45	2.2	1.71	-2.85	0.36	0.00142	Soluble	-3.38	0.105	0.000413	Soluble	-4.5	0.00799	3.14e-05	Moderately soluble	High	No	No	No	No	No	No	No	-6.47	0	0	0	0	0	0.55	1	1	0	2.03
ZINC5179119	C/C(=N/S(=O)(=O)c1ccc(cc1)N)/O	C8H10N2O3S	214.24	14	6	0.12	2	4	2	54	101.13	0.96	0.52	2.02	0.69	0.02	0.84	-1.68	4.47	0.0208	Very soluble	-2.21	1.31	0.0061	Soluble	-1.88	2.85	0.0133	Soluble	High	No	No	No	No	No	No	No	-7.24	0	0	0	0	0	0.55	0	3	1	2.58
ZINC5224188	CS(=O)C	C2H6OS	78.13	4	0	1	0	1	0	20.01	36.28	1.03	-0.61	0.86	-0.37	-0.64	0.05	0.06	89.7	1.15	Highly soluble	0.32	163	2.09	Highly soluble	-0.55	22.1	0.283	Soluble	High	Yes	No	No	No	No	No	No	-7.21	0	3	0	0	2	0.55	0	0	1	1.64
ZINC5844788	O[C@H]([C@@H]1CCc2c(O1)ccc(c2)F)CNC[C@H]([C@H]1CCc2c(O1)ccc(c2)F)O	C22H25F2NO4	405.44	29	12	0.45	6	7	3	103.34	70.95	3.73	4.04	3.2	2.64	4.14	3.55	-4.81	0.00629	1.55e-05	Moderately soluble	-5.23	0.00237	5.84e-06	Moderately soluble	-5.88	0.000537	1.32e-06	Moderately soluble	High	Yes	Yes	No	No	No	Yes	Yes	-5.9	0	0	0	0	0	0.55	0	0	2	4.24
ZINC5844792	O[C@H]([C@@H]1CCc2c(O1)ccc(c2)F)CNC[C@@H]([C@@H]1CCc2c(O1)ccc(c2)F)O	C22H25F2NO4	405.44	29	12	0.45	6	7	3	103.34	70.95	3.89	4.04	3.2	2.64	4.14	3.58	-4.81	0.00629	1.55e-05	Moderately soluble	-5.23	0.00237	5.84e-06	Moderately soluble	-5.88	0.000537	1.32e-06	Moderately soluble	High	Yes	Yes	No	No	No	Yes	Yes	-5.9	0	0	0	0	0	0.55	0	0	2	4.24
ZINC6021033	C[C@@H](Cc1ccccc1)N	C9H13N	135.21	10	6	0.33	2	1	1	43.73	26.02	1.9	1.76	1.58	2.19	1.94	1.87	-2.1	1.08	0.00796	Soluble	-1.92	1.61	0.0119	Very soluble	-2.85	0.193	0.00143	Soluble	High	Yes	No	No	No	No	No	No	-5.88	0	1	0	0	2	0.55	0	0	1	1.19
ZINC6036847	C[C@H](Cc1ccccc1)N	C9H13N	135.21	10	6	0.33	2	1	1	43.73	26.02	2.08	1.76	1.58	2.19	1.94	1.91	-2.1	1.08	0.00796	Soluble	-1.92	1.61	0.0119	Very soluble	-2.85	0.193	0.00143	Soluble	High	Yes	No	Yes	No	No	No	No	-5.88	0	1	0	0	2	0.55	0	0	1	1.19
ZINC6409735	Ic1cc(Cl)c2c(c1O)nccc2	C9H5ClINO	305.5	13	10	0	0	2	1	61.49	33.12	1.93	3.53	3.2	2.6	3.53	2.96	-4.53	0.00907	2.97e-05	Moderately soluble	-3.91	0.0376	0.000123	Soluble	-4.68	0.00641	2.1e-05	Moderately soluble	High	Yes	No	Yes	No	No	No	No	-5.66	0	1	0	0	0	0.55	0	1	1	1.94
ZINC6627681	COc1cc(Cc2cnc(nc2N)N)cc(c1OC)OC	C14H18N4O3	290.32	21	12	0.29	5	5	2	79.77	105.51	2.21	0.91	1.27	0.41	1.41	1.24	-2.31	1.43	0.00494	Soluble	-2.71	0.564	0.00194	Soluble	-4.23	0.017	5.85e-05	Moderately soluble	High	No	Yes	No	No	No	No	No	-7.42	0	0	0	0	0	0.55	0	0	0	2.58
ZINC6661227	N[C@H](C(=O)O)Cc1c[nH]cn1	C6H9N3O2	155.15	11	5	0.33	3	4	3	37.65	92	-0.13	-3.56	-0.64	-3.74	-0.06	-1.63	1.3	3110	20.1	Highly soluble	2.21	25200	163	Highly soluble	-0.69	31.8	0.205	Soluble	High	No	No	No	No	No	No	No	-9.77	0	3	0	0	2	0.55	0	0	1	2.29
ZINC6716957	Cc1ncn(c1)c1cc(NC(=O)c2ccc(c(c2)Nc2nccc(n2)c2cccnc2)C)cc(c1)C(F)(F)F	C28H22F3N7O	529.52	39	29	0.11	8	8	2	141.08	97.62	3.36	4.9	7.32	2.75	4.83	4.63	-6.23	0.00031	5.86e-07	Poorly soluble	-6.69	0.000109	2.06e-07	Poorly soluble	-10.86	7.29e-09	1.38e-11	Insoluble	Low	No	No	No	Yes	Yes	Yes	Yes	-6.05	1	3	0	1	0	0.55	0	0	3	3.81
ZINC6827693	OC(=O)O	CH2O3	62.02	4	0	0	0	3	2	10.65	57.53	-0.22	-0.13	0.22	-1.6	-0.44	-0.43	-0.14	44.7	0.72	Very soluble	-0.62	14.7	0.237	Very soluble	1.49	1910	30.8	Soluble	High	No	No	No	No	No	No	No	-6.77	0	3	0	0	2	0.85	0	0	1	1.36
ZINC7997568	O=C1NC(=O)N(C1)/N=C\c1ccc(o1)[N+](=O)[O-]	C8H6N4O5	238.16	17	5	0.12	3	6	1	62.8	120.73	0.24	-0.47	-0.69	-0.68	-1.6	-0.64	-1.04	21.7	0.0912	Very soluble	-1.6	6	0.0252	Very soluble	-1.09	19.4	0.0817	Soluble	High	No	No	No	No	No	No	No	-8.09	0	1	0	0	0	0.55	0	4	1	3.1
ZINC7997897	CN(Cc1cccc2c1cccc2)C/C=C\c1ccccc1	C21H21N	287.4	22	16	0.14	5	1	0	95.84	3.24	3.51	5.15	4.72	4.74	5.01	4.63	-5.07	0.00242	8.42e-06	Moderately soluble	-4.96	0.00313	1.09e-05	Moderately soluble	-7.21	1.78e-05	6.21e-08	Poorly soluble	High	Yes	No	Yes	Yes	No	Yes	No	-4.4	1	0	0	0	2	0.55	0	0	1	2.45
ZINC7997952	CN(CCO[C@@](c1ccccn1)(c1ccccc1)C)C	C17H22N2O	270.37	20	12	0.35	6	3	0	81.59	25.36	3.35	2.46	2.81	1.89	3.12	2.73	-3.11	0.208	0.000769	Soluble	-2.64	0.624	0.00231	Soluble	-5.64	0.000621	2.3e-06	Moderately soluble	High	Yes	No	No	No	No	Yes	No	-6.2	0	0	0	0	0	0.55	0	0	0	3.04
ZINC8034120	NC(=O)NO	CH4N2O2	76.05	5	0	0	1	2	3	13.75	75.35	-0.16	-1.8	-0.96	-1.64	-0.91	-1.09	0.89	588	7.74	Highly soluble	0.73	413	5.42	Highly soluble	1.18	1160	15.2	Soluble	High	No	No	No	No	No	No	No	-8.04	0	4	0	0	2	0.55	0	2	1	2.06
ZINC8034121	NCCS	C2H7NS	77.15	4	0	1	1	1	1	22.36	64.82	1.05	-0.43	-0.13	-0.23	-0.12	0.03	0.02	80.5	1.04	Highly soluble	-0.47	26.4	0.342	Very soluble	-0.32	37.4	0.484	Soluble	High	No	No	No	No	No	No	No	-7.08	0	3	0	0	2	0.55	0	1	1	1
ZINC8101126	NC(=N)N	CH5N3	59.07	4	0	0	0	1	3	15.93	75.89	-0.18	-1.34	-1.16	-1.6	-0.79	-1.01	0.64	257	4.34	Highly soluble	0.25	104	1.76	Highly soluble	0.92	494	8.36	Soluble	High	No	No	No	No	No	No	No	-7.61	0	4	0	0	2	0.55	0	2	1	1.94
ZINC8214483	NCC[C@@H](C(=O)N[C@@H]1C[C@H](N)[C@H]([C@@H]([C@H]1O[C@H]1O[C@H](CO)[C@H]([C@@H]([C@H]1O)N)O)O)O[C@H]1O[C@H](CN)[C@H]([C@@H]([C@H]1O)O)O)O	C22H43N5O13	585.6	40	0	0.95	11	17	13	128.99	331.94	1.19	-7.89	-8.42	-6.85	-7.58	-5.91	2.23	98500	168	Highly soluble	1.67	27100	46.3	Highly soluble	4.82	38900000	66400	Soluble	Low	No	Yes	No	No	No	No	No	-15.47	3	3	2	1	4	0.17	0	0	2	6.74
ZINC8214692	NC[C@H]1O[C@H](O[C@@H]2[C@@H](N)C[C@H]([C@@H]([C@H]2O)O[C@H]2O[C@H](CO)[C@H]([C@@H]([C@H]2O)N)O)N)[C@@H](C[C@@H]1O)N	C18H37N5O9	467.51	32	0	1	6	14	10	105.98	268.17	1.46	-6.23	-6.3	-5.09	-6.58	-4.55	1.58	17900	38.2	Highly soluble	1.28	8950	19.1	Highly soluble	3.94	4110000	8790	Soluble	Low	No	Yes	No	No	No	No	No	-13.58	2	1	1	1	4	0.17	0	0	1	6.42
ZINC8403947	CC(Cc1ccccc1)(N)C	C10H15N	149.23	11	6	0.4	2	1	1	48.57	26.02	2.18	1.9	1.97	2.49	2.13	2.13	-2.23	0.871	0.00584	Soluble	-2.07	1.27	0.00853	Soluble	-3.25	0.0847	0.000568	Soluble	High	Yes	No	Yes	No	No	No	No	-5.86	0	1	0	0	2	0.55	0	0	1	1
ZINC9212428	O=CN1[C@H](CNc2ccc(cc2)C(=O)N[C@H](C(=O)O)CCC(=O)O)CNc2c1c(=O)[nH]c(n2)N	C20H23N7O7	473.44	34	12	0.3	11	8	7	126.52	219.84	0.14	-1.24	-1.87	-0.89	-0.94	-0.96	-1.53	14	0.0296	Very soluble	-2.88	0.623	0.00131	Soluble	-3.29	0.243	0.000514	Soluble	Low	No	No	No	No	No	No	No	-10.07	2	1	2	1	2	0.11	0	1	2	4.14
ZINC9224016	N#Cc1cc(c2ccncc2)c([nH]c1=O)C	C12H9N3O	211.22	16	12	0.08	1	3	1	59.97	69.54	1.46	0.62	1.62	0.41	3.04	1.43	-2.03	1.98	0.00935	Soluble	-1.65	4.68	0.0221	Very soluble	-4.56	0.00586	2.77e-05	Moderately soluble	High	Yes	No	Yes	No	No	No	No	-7.15	0	0	0	0	0	0.55	0	0	1	2.26
ZINC11680943	NCCCC[C@@H](C(=O)N[C@H](Cc1ccccc1)C)N	C15H25N3O	263.38	19	6	0.53	9	3	3	78.28	81.14	2.36	1.19	1.19	1.51	1.99	1.65	-1.86	3.62	0.0137	Very soluble	-2.49	0.852	0.00324	Soluble	-4.19	0.017	6.46e-05	Moderately soluble	High	No	Yes	No	No	No	Yes	No	-7.06	0	0	0	0	0	0.55	0	0	1	2.6
ZINC11726211	O=Cc1cnc2n1CCc1c(C2=C2CCN(CC2)C)cccc1	C19H21N3O	307.39	23	11	0.37	1	3	0	95.04	38.13	2.53	1.66	2.4	1.8	3.12	2.3	-3.08	0.256	0.000833	Soluble	-2.07	2.59	0.00842	Soluble	-4.77	0.00518	1.69e-05	Moderately soluble	High	Yes	Yes	Yes	Yes	No	Yes	Yes	-7	0	0	0	0	0	0.55	0	1	0	3.39
ZINC12404516	ClCC/C(=C(\c1ccccc1)/c1ccc(cc1)OCCN(C)C)/c1ccccc1	C26H28ClNO	405.96	29	18	0.23	9	2	0	124.52	12.47	4.7	7.2	6.22	5.3	6.5	5.98	-6.76	7.08e-05	1.74e-07	Poorly soluble	-7.28	2.11e-05	5.19e-08	Poorly soluble	-9.52	1.21e-07	2.99e-10	Poorly soluble	Low	No	Yes	No	Yes	No	Yes	Yes	-3.66	1	1	0	1	1	0.55	0	2	3	3.18
ZINC12484958	C/C(=C/C=C\C(=C/C(=O)O)\C)/C=C\C1=C(C)CCCC1(C)C	C20H28O2	300.44	22	0	0.45	5	2	1	95.28	37.3	4.7	7.2	5.6	5.3	6.5	5.98	-6.76	7.08e-05	1.74e-07	Poorly soluble	-7.28	2.11e-05	5.19e-08	Poorly soluble	-9.52	1.21e-07	2.99e-10	Poorly soluble	Low	No	Yes	No	Yes	No	Yes	Yes	-3.66	1	1	0	1	1	0.55	0	2	3	3.18
ZINC12503151	CC(=O)/N=c/1\sc(nn1C)S(=O)(=O)N	C5H8N4O3S2	236.27	14	5	0.4	2	6	1	48.79	144.03	0.05	0.13	-0.34	-1.47	0.02	-0.32	-1.52	7.15	0.0303	Very soluble	-2.71	0.46	0.00195	Soluble	-0.45	84.8	0.359	Soluble	Low	No	No	No	No	No	No	No	-7.65	0	0	1	1	0	0.55	0	0	1	3.11
ZINC12503156	O=N/C=c/1\ccccn1C	C7H8N2O	136.15	10	6	0.14	1	2	0	39.99	34.36	1.97	0.93	0.81	-0.03	1.22	0.98	-1.65	3.06	0.0225	Very soluble	-1.24	7.87	0.0578	Very soluble	-1.56	3.78	0.0278	Soluble	High	Yes	No	No	No	No	No	No	-6.47	0	3	0	0	1	0.55	0	0	1	2.47
ZINC12661824	C/C(=C/C=C/C(=C/C(=O)O)/C)/C=C/C1=C(C)CCCC1(C)C	C20H28O2	300.44	22	0	0.45	5	2	1	95.28	37.3	3.68	6.3	5.6	4.28	5.21	5.01	-5.34	0.00137	4.55e-06	Moderately soluble	-6.87	4.03e-05	1.34e-07	Poorly soluble	-3.17	0.205	0.000684	Soluble	High	Yes	No	Yes	Yes	Yes	No	No	-3.66	1	1	0	0	1	0.85	0	2	1	4.1
ZINC12859773	CN(C(=N)NC(=N)N)C	C4H11N5	129.16	9	0	0.5	3	2	4	36.93	88.99	0.77	-1.06	-1.03	-0.56	-1.85	-0.75	0.22	217	1.68	Highly soluble	-0.32	61.8	0.479	Very soluble	0.17	190	1.47	Soluble	High	No	No	No	No	No	No	No	-7.84	0	3	0	0	2	0.55	0	2	1	3.11
ZINC13129998	Cc1cnc(s1)NC(=O)C1=C(O)c2ccccc2S(=O)(=O)N1C	C14H13N3O4S2	351.4	23	11	0.14	3	5	2	90.37	136.22	1.74	3.43	2.46	-0.26	1.3	1.73	-4.34	0.0162	4.62e-05	Moderately soluble	-5.97	0.000376	1.07e-06	Moderately soluble	-3.75	0.0619	0.000176	Soluble	High	No	No	No	No	Yes	No	Yes	-6.01	0	0	0	1	0	0.56	0	0	1	3.57
ZINC13298313	O=c1[nH]cnc2c1cn[nH]2	C5H4N4O	136.11	10	9	0	0	3	2	34.51	74.43	0.09	-0.67	-0.35	-0.36	1.33	0.01	-0.93	16.1	0.118	Very soluble	-0.42	51.9	0.381	Very soluble	-2.04	1.24	0.00908	Soluble	High	No	No	No	No	No	No	No	-7.61	0	3	0	0	1	0.55	0	0	1	1.76
ZINC13520815	Oc1ccc2c(c1)CC[C@@H]1[C@@H]2CC[C@]2([C@H]1CC[C@@H]2O)C	C18H24O2	272.38	20	6	0.67	0	2	2	81.03	40.46	2.6	4.01	3.61	3.53	3.25	3.4	-4.28	0.0144	5.28e-05	Moderately soluble	-4.56	0.00747	2.74e-05	Moderately soluble	-3.75	0.0485	0.000178	Soluble	High	Yes	Yes	No	No	No	Yes	No	-5.11	0	0	0	0	0	0.55	0	0	1	3.49
ZINC13537284	O=C1N(CCc2c1c1ccccc1n2C)Cc1[nH]cnc1C	C17H18N4O	294.35	22	14	0.29	2	2	1	89.46	53.92	2.22	1.6	1.88	1.36	2.88	1.99	-3.01	0.286	0.000973	Soluble	-2.34	1.33	0.00453	Soluble	-5.04	0.00269	9.14e-06	Moderately soluble	High	Yes	Yes	Yes	No	No	Yes	Yes	-6.96	0	0	0	0	0	0.55	0	0	0	2.52
ZINC13540519	OCC(=O)[C@@]1(O)CC[C@@H]2[C@]1(C)C[C@H](O)[C@H]1[C@H]2CCC2=CC(=O)CC[C@]12C	C21H30O5	362.46	26	0	0.81	2	5	3	97.53	94.83	2.2	1.61	1.78	1.39	2.47	1.89	-2.97	0.389	0.00107	Soluble	-3.21	0.222	0.000612	Soluble	-2.63	0.842	0.00232	Soluble	High	No	Yes	No	No	No	No	No	-7.37	0	0	0	0	0	0.55	0	0	1	5.16
ZINC13545634	CCC[C@H](C1(CC)C(=O)NC(=O)NC1=O)C	C11H18N2O3	226.27	16	0	0.73	4	3	2	67.04	75.27	1.58	2.1	0.42	0.93	1.71	1.35	-2.3	1.13	0.00499	Soluble	-3.31	0.111	0.000489	Soluble	-3.18	0.149	0.000661	Soluble	High	No	No	No	No	No	No	No	-6.19	0	0	0	0	0	0.55	0	1	1	2.58
ZINC13597823	OC[C@@H]1CC[C@@H](O1)n1cnc2c1nc[nH]c2=O	C10H12N4O3	236.23	17	9	0.5	2	5	2	58.77	93.03	0.88	-1.47	-0.53	-0.29	0.28	-0.23	-0.64	54.3	0.23	Very soluble	0.02	248	1.05	Highly soluble	-1.47	7.93	0.0336	Soluble	High	No	No	No	No	No	No	No	-8.78	0	1	0	0	0	0.55	0	0	1	3.25
ZINC13763987	C[N+](=C1C=CC(=C(c2ccc(cc2)N(C)C)c2ccc(cc2)N(C)C)C=C1)C	C25H30N3+	372.53	28	12	0.24	4	0	0	122.6	9.49	0.63	-0.06	4.46	3.89	3.11	2.41	-2.17	2.55	0.00684	Soluble	0.31	764	2.05	Highly soluble	-6.65	8.3e-05	2.23e-07	Poorly soluble	High	Yes	Yes	No	No	No	Yes	No	-8.62	0	0	0	0	0	0.55	1	2	1	4.07
ZINC14879992	CN([C@@H]1C(=C(C(=O)N)C(=O)[C@@]2([C@H]1C[C@@H]1Cc3c(C(=O)C1=C2O)c(O)ccc3N(C)C)O)O)C	C23H27N3O7	457.48	33	6	0.43	3	8	5	118.57	164.63	1.66	0.05	0.19	-1.6	-0.5	-0.04	-2.64	1.04	0.00227	Soluble	-3.06	0.398	0.00087	Soluble	-2.12	3.48	0.0076	Soluble	Low	No	Yes	No	No	No	No	No	-9.06	0	0	1	1	1	0.11	0	1	1	5.07
ZINC16052277	CN([C@@H]1C(=C(C(=N)O)C(=O)[C@@]2([C@H]1[C@@H](O)[C@@H]1[C@@H](C)c3cccc(c3C(=O)C1=C2O)O)O)O)C	C22H24N2O8	444.43	32	6	0.41	2	10	7	112.59	182.61	1.87	0.17	0.7	-1.68	-0.62	0.09	-2.71	0.868	0.00195	Soluble	-3.56	0.122	0.000274	Soluble	-1.3	22.2	0.05	Soluble	Low	No	Yes	No	No	No	No	No	-8.89	1	0	1	1	2	0.11	0	2	1	5.24
ZINC16929327	OC[C@H]1O[C@H](C[C@@H]1O)n1cnc(nc1=O)N	C8H12N4O4	228.21	16	6	0.62	2	6	3	52.48	123.49	0.78	-1.89	-2.46	-2.2	-1.84	-1.52	-0.21	141	0.617	Very soluble	-0.18	150	0.656	Very soluble	0.58	860	3.77	Soluble	Low	No	No	No	No	No	No	No	-9.03	0	1	0	0	0	0.55	0	0	1	3.46
ZINC17146904	CCCSc1ccc2c(c1)[nH]/c(=N\C(=O)OC)/[nH]2	C12H15N3O2S	265.33	18	9	0.33	5	3	2	71.89	95.54	2.8	2.43	2.67	1.68	3.45	2.61	-3.06	0.233	0.000879	Soluble	-4.08	0.0221	8.33e-05	Moderately soluble	-4.35	0.0119	4.48e-05	Moderately soluble	High	No	No	Yes	Yes	No	No	No	-6.19	0	0	0	0	0	0.55	0	0	0	2.73
ZINC18043251	Cn1c(=O)n(C)c2c(c1=O)[nH]cn2	C7H8N4O2	180.16	13	9	0.29	0	3	1	47.14	72.68	0.53	-0.02	-1.04	-0.52	0.12	-0.19	-1.46	6.29	0.0349	Very soluble	-1.06	15.8	0.0878	Very soluble	-1.1	14.2	0.0789	Soluble	High	No	No	No	No	No	No	No	-7.41	0	1	0	0	1	0.55	0	0	1	1.87
ZINC18115268	N#C/N=C(/NCCSCc1nc[nH]c1C)\NC	C10H16N6S	252.34	17	5	0.5	7	3	3	69.18	114.19	1.63	0.02	0.45	-0.71	1.52	0.58	-1.17	17	0.0672	Very soluble	-1.97	2.7	0.0107	Very soluble	-3.62	0.0601	0.000238	Soluble	High	No	No	No	No	No	No	No	-7.83	0	0	0	0	0	0.55	1	3	0	3.21
ZINC18279854	OC[C@H]1O[C@H](C([C@@H]1O)(F)F)n1ccc(nc1=O)N	C9H11F2N3O4	263.2	18	6	0.56	2	7	3	54.83	110.6	0.61	-1.46	-0.76	-1.2	-0.94	-0.75	-0.67	56.7	0.215	Very soluble	-0.36	115	0.438	Very soluble	-0.34	121	0.459	Soluble	High	No	No	No	No	No	No	No	-8.94	0	1	0	0	0	0.55	0	0	0	3.71
ZINC18279893	OC[C@H]([C@H]([C@@H]([C@H](CO)O)O)O)O	C6H14O6	182.17	12	0	1	5	6	6	37.93	121.38	1.88	-3.1	-3.59	-2.77	-1.91	-1.9	1.31	3750	20.6	Highly soluble	1.12	2380	13.1	Highly soluble	2.57	67100	368	Soluble	Low	No	No	No	No	No	No	No	-9.61	1	2	0	0	3	0.55	0	0	1	3.3
ZINC18324776	CCOc1ccc(cc1c1[nH]c(=O)c2n(n1)c(CCC)nc2C)S(=O)(=O)N1CCN(CC1)CC	C23H32N6O4S	488.6	34	15	0.52	8	8	1	138.53	121.28	3.8	2.46	2.39	1.82	2.42	2.58	-4.22	0.0296	6.06e-05	Moderately soluble	-4.65	0.0109	2.23e-05	Moderately soluble	-6.21	0.000298	6.1e-07	Poorly soluble	High	No	Yes	No	No	Yes	No	Yes	-7.53	0	2	0	0	0	0.55	0	0	2	4.26
ZINC19156872	CN1CCN(CC1)C(c1ccccc1)c1ccccc1	C18H22N2	266.38	20	12	0.33	3	2	0	91.44	6.48	3.25	3.63	1.94	3.01	3.15	2.99	-4.02	0.0252	9.45e-05	Moderately soluble	-3.45	0.0936	0.000351	Soluble	-5.13	0.00196	7.36e-06	Moderately soluble	High	Yes	No	No	No	No	Yes	No	-5.35	0	0	0	0	0	0.55	0	0	1	1.84
ZINC19166988	CNNCc1ccc(cc1)C(=O)NC(C)C	C12H19N3O	221.3	16	6	0.42	6	3	3	64.43	53.16	2.55	0.06	0.9	1.8	1.24	1.31	-1.13	16.4	0.0739	Very soluble	-0.73	41.2	0.186	Very soluble	-4.12	0.0166	7.52e-05	Moderately soluble	High	Yes	No	No	No	No	No	No	-7.61	0	0	0	0	0	0.55	0	0	1	1.55
ZINC19166991	NNCCc1ccccc1	C8H12N2	136.19	10	6	0.25	3	2	2	41.72	38.05	1.49	1.16	0.69	1.76	0.98	1.22	-1.66	2.97	0.0218	Very soluble	-1.55	3.8	0.0279	Very soluble	-2.87	0.185	0.00136	Soluble	High	Yes	No	No	No	No	No	No	-6.31	0	1	0	0	1	0.55	0	1	1	1.1
ZINC19203912	OCCN1CCN(CC1)CCCN1c2ccccc2Sc2c1cc(cc2)C(F)(F)F	C22H26F3N3OS	437.52	30	12	0.45	7	6	1	124.07	55.25	3.83	4.36	4.32	3.84	4.05	4.08	-5.13	0.00322	7.35e-06	Moderately soluble	-5.24	0.00254	5.81e-06	Moderately soluble	-6.36	0.000191	4.38e-07	Poorly soluble	High	Yes	Yes	Yes	No	No	Yes	No	-5.87	0	0	0	0	0	0.55	0	0	2	3.58
ZINC19228902	OCCN1CCN(CC1)CCCN1c2ccccc2Sc2c1cc(Cl)cc2	C21H26ClN3OS	403.97	27	12	0.43	6	3	1	124.08	55.25	3.86	4.2	2.8	3.52	3.62	3.6	-4.92	0.00482	1.19e-05	Moderately soluble	-5.07	0.00344	8.52e-06	Moderately soluble	-6.12	0.000307	7.6e-07	Poorly soluble	High	Yes	Yes	Yes	No	No	Yes	No	-5.78	0	0	0	0	0	0.55	0	0	2	3.51
ZINC19361042	Clc1ccc(cc1)[C@@H](c1ccccc1)N1CCN(CC1)Cc1cccc(c1)C	C25H27ClN2	390.95	28	18	0.28	5	2	0	125.9	6.48	4.47	5.75	4.32	4.78	5.7	5	-6.03	0.000363	9.29e-07	Poorly soluble	-5.65	0.000867	2.22e-06	Moderately soluble	-8.6	9.84e-07	2.52e-09	Poorly soluble	High	Yes	Yes	Yes	No	No	Yes	Yes	-4.6	1	0	0	0	1	0.55	0	0	2	3.07
ZINC19363537	NCCNCCNCCNCCN	C8H23N5	189.3	13	0	1	10	5	5	54.39	88.13	2.03	-2.94	-2.33	-1.27	-0.94	-1.09	1.5	5970	31.5	Highly soluble	1.65	8430	44.6	Highly soluble	-2.56	0.524	0.00277	Soluble	Low	No	No	No	No	No	No	No	-9.54	0	1	0	0	2	0.55	0	0	2	1.7
ZINC19364222	OCCOCCN1CCN(CC1)[C@H](c1ccc(cc1)Cl)c1ccccc1	C21H27ClN2O2	374.9	26	12	0.43	8	4	1	113.12	35.94	3.95	3.7	1.97	2.45	3.81	3.18	-4.31	0.0184	4.91e-05	Moderately soluble	-4.15	0.0268	7.15e-05	Moderately soluble	-6.09	0.000307	8.18e-07	Poorly soluble	High	Yes	No	No	No	No	Yes	No	-5.96	0	0	0	0	0	0.55	0	0	3	3.2
ZINC19364224	OCCOCCN1CCN(CC1)[C@@H](c1ccc(cc1)Cl)c1ccccc1	C21H27ClN2O2	374.9	26	12	0.43	8	4	1	113.12	35.94	3.95	3.7	1.97	2.45	3.81	3.17	-4.31	0.0184	4.91e-05	Moderately soluble	-4.15	0.0268	7.15e-05	Moderately soluble	-6.09	0.000307	8.18e-07	Poorly soluble	High	Yes	No	No	No	No	Yes	No	-5.96	0	0	0	0	0	0.55	0	0	3	3.2
ZINC19364230	OC(=O)COCCN1CCN(CC1)[C@@H](c1ccc(cc1)Cl)c1ccccc1	C21H25ClN2O3	388.89	27	12	0.38	8	5	1	113.73	53.01	3.49	1.7	2.06	2.35	3.35	2.59	-3.12	0.293	0.000753	Soluble	-2.43	1.45	0.00373	Soluble	-5.62	0.000933	2.4e-06	Moderately soluble	High	Yes	Yes	No	No	No	Yes	No	-7.47	0	0	0	0	0	0.55	0	0	2	3.19
ZINC19418959	CN1CCN(CC1)CCCN1c2ccccc2Sc2c1cc(cc2)C(F)(F)F	C21H24F3N3S	407.5	28	12	0.43	5	5	0	118.1	35.02	3.91	5.03	4.96	4.48	4.27	4.53	-5.52	0.00122	3e-06	Moderately soluble	-5.51	0.00127	3.12e-06	Moderately soluble	-6.54	0.000118	2.89e-07	Poorly soluble	High	Yes	Yes	Yes	No	No	Yes	No	-5.21	1	0	0	0	1	0.55	0	0	2	3.47
ZINC19419017	OC(=O)CN(CCN(CC(=O)O)CC(=O)O)CCN(CC(=O)O)CC(=O)O	C14H23N3O10	393.35	27	0	0.64	16	13	5	86.96	196.22	0.05	-8.53	-2.68	-2.22	-2.94	-3.27	4.15	5570000	14200	Highly soluble	5.18	59500000	151000	Highly soluble	1.67	18400	46.8	Soluble	Low	No	Yes	No	No	No	No	No	-14.76	1	1	2	1	4	0.11	0	0	2	2.65
ZINC19594557	Clc1ccc(cc1)[C@H](c1ccccc1)N1CCN(CC1)Cc1cccc(c1)C	C25H27ClN2	390.95	28	18	0.28	5	2	0	125.9	6.48	4.43	5.75	4.32	4.78	5.7	5	-6.03	0.000363	9.29e-07	Poorly soluble	-5.65	0.000867	2.22e-06	Moderately soluble	-8.6	9.84e-07	2.52e-09	Poorly soluble	High	Yes	Yes	Yes	No	No	Yes	Yes	-4.6	1	0	0	0	1	0.55	0	0	2	3.07
ZINC19632618	CN1CCN(CC1)Cc1ccc(cc1)C(=O)Nc1ccc(c(c1)Nc1nccc(n1)c1cccnc1)C	C29H31N7O	493.6	37	24	0.24	8	6	2	154.5	86.28	4.04	3.52	3.49	2.15	3.69	3.38	-5.07	0.0042	8.51e-06	Moderately soluble	-5.02	0.00476	9.64e-06	Moderately soluble	-9.67	1.05e-07	2.12e-10	Poorly soluble	High	No	Yes	No	Yes	Yes	Yes	Yes	-6.81	0	2	0	0	0	0.55	0	0	3	3.78
ZINC19632668	CCN1C[C@H](C(C1=O)(c1ccccc1)c1ccccc1)CCN1CCOCC1	C24H30N2O2	378.51	28	12	0.46	6	3	0	119.33	32.78	3.52	3.25	2.41	2.93	4.23	3.27	-4.16	0.0265	6.99e-05	Moderately soluble	-3.61	0.0925	0.000244	Soluble	-6.73	7e-05	1.85e-07	Poorly soluble	High	Yes	Yes	No	No	No	Yes	Yes	-6.3	0	0	0	0	0	0.55	0	0	1	3.3
ZINC19632670	CCN1C[C@@H](C(C1=O)(c1ccccc1)c1ccccc1)CCN1CCOCC1	C24H30N2O2	378.51	28	12	0.46	6	3	0	119.33	32.78	3.62	3.25	2.41	2.93	4.23	3.29	-4.16	0.0265	6.99e-05	Moderately soluble	-3.61	0.0925	0.000244	Soluble	-6.73	7e-05	1.85e-07	Poorly soluble	High	Yes	Yes	No	No	No	Yes	Yes	-6.3	0	0	0	0	0	0.55	0	0	1	3.3
ZINC19632718	COCCOC(=O)C1=C(C)NC(=C([C@H]1c1cccc(c1)[N+](=O)[O-])C(=O)OC(C)C)C	C21H26N2O7	418.44	30	6	0.43	10	7	1	114.84	119.68	3.24	3.05	2.59	0.97	1.51	2.27	-3.84	0.06	0.000143	Soluble	-5.23	0.00247	5.9e-06	Moderately soluble	-4.75	0.00751	1.79e-05	Moderately soluble	High	No	No	Yes	Yes	Yes	Yes	Yes	-6.69	0	0	0	0	0	0.55	0	3	2	4.39
ZINC19796018	CN1CCN(CC1)CCCN1c2ccccc2Sc2c1cc(Cl)cc2	C20H24ClN3S	373.94	25	12	0.4	4	2	0	118.11	35.02	3.99	4.88	3.44	4.15	3.85	4.06	-5.32	0.00177	4.74e-06	Moderately soluble	-5.35	0.00167	4.46e-06	Moderately soluble	-6.3	0.000189	5.05e-07	Poorly soluble	High	Yes	Yes	Yes	No	No	Yes	No	-5.12	0	0	0	0	0	0.55	0	0	2	3.4
ZINC19796080	Fc1ccc(cc1)C(=O)CCCN1CCC(=CC1)n1c(=O)[nH]c2c1cccc2	C22H22FN3O2	379.43	28	15	0.27	6	4	1	112.16	58.1	3.29	3.5	3.72	3.1	4.17	3.56	-4.4	0.0152	4e-05	Moderately soluble	-4.4	0.015	3.95e-05	Moderately soluble	-6.37	0.000163	4.31e-07	Poorly soluble	High	Yes	No	Yes	Yes	Yes	Yes	Yes	-6.13	0	0	0	0	0	0.55	0	0	1	3.34
ZINC19796087	COC(=O)C1=C(C)NC(=C([C@@H]1c1cccc(c1)[N+](=O)[O-])C(=O)OCCN(Cc1ccccc1)C)C	C26H29N3O6	479.52	35	12	0.31	11	7	1	136.33	113.69	3.6	3.82	3.15	1.81	2.02	2.88	-4.75	0.00858	1.79e-05	Moderately soluble	-5.9	0.0006	1.25e-06	Moderately soluble	-6.77	8.22e-05	1.71e-07	Poorly soluble	High	No	No	No	Yes	Yes	Yes	Yes	-6.51	0	1	1	0	0	0.55	0	3	3	4.6
ZINC19796155	CN1CCN(CC1)C1=Nc2cc(Cl)ccc2Nc2c1cccc2	C18H19ClN4	326.82	23	12	0.28	1	2	1	110.05	30.87	2.83	3.23	2.2	3.31	3.31	2.98	-4.22	0.0196	6.01e-05	Moderately soluble	-3.55	0.0918	0.000281	Soluble	-6.03	0.000304	9.31e-07	Poorly soluble	High	Yes	Yes	Yes	No	No	Yes	Yes	-6	0	0	0	0	0	0.55	0	0	0	3.69
ZINC19796168	CCCc1nn(c2c1nc([nH]c2=O)c1cc(ccc1OCC)S(=O)(=O)N1CCN(CC1)C)C	C22H30N6O4S	474.58	33	15	0.5	7	8	1	134.56	121.8	3.03	1.48	1.93	1.2	2.06	1.94	-3.59	0.122	0.000258	Soluble	-3.64	0.108	0.000227	Soluble	-5.83	0.000708	1.49e-06	Moderately soluble	High	No	Yes	No	No	Yes	No	Yes	-8.14	0	1	0	0	0	0.55	0	0	1	3.95
ZINC21982937	OC(=O)CN([C@H](C(=O)O)COCc1ccccc1)CCN(CC(=O)O)CCN(CC(=O)O)CC(=O)O	C22H31N3O11	513.5	36	6	0.5	20	14	5	122.14	205.45	0.69	-7.15	-1.25	-1.31	-1.15	-2.03	2.68	244000	476	Highly soluble	3.55	1840000	3580	Highly soluble	-0.92	61.9	0.121	Soluble	Low	No	Yes	No	No	No	No	No	-14.51	2	2	2	1	4	0.11	0	0	2	3.9
ZINC22002218	CCc1c(C)[nH]c2c1C(=O)[C@H](CC2)CN1CCOCC1	C16H24N2O2	276.37	20	5	0.69	3	3	1	83.2	45.33	2.85	1.74	1.58	1.01	3.77	2.19	-2.64	0.638	0.00231	Soluble	-2.31	1.36	0.00491	Soluble	-4.14	0.0199	7.19e-05	Moderately soluble	High	Yes	Yes	No	No	No	Yes	No	-6.75	0	0	0	0	0	0.55	0	0	0	3.21
ZINC22010375	C[C@H]1N(C)CCO[C@@H]1c1ccccc1	C12H17NO	191.27	14	6	0.5	1	2	0	61.22	12.47	2.55	1.85	1.37	1.74	2.08	1.92	-2.44	0.69	0.00361	Soluble	-1.73	3.54	0.0185	Very soluble	-2.9	0.241	0.00126	Soluble	High	Yes	No	No	No	No	No	No	-6.15	0	0	0	0	1	0.55	0	0	1	2.52
ZINC22010379	C[C@@H]1N(C)CCO[C@@H]1c1ccccc1	C12H17NO	191.27	14	6	0.5	1	2	0	61.22	12.47	2.58	1.85	1.37	1.74	2.08	1.93	-2.44	0.69	0.00361	Soluble	-1.73	3.54	0.0185	Very soluble	-2.9	0.241	0.00126	Soluble	High	Yes	No	No	No	No	No	No	-6.15	0	0	0	0	1	0.55	0	0	1	2.52
ZINC22010387	C[C@@H]1N(C)CCO[C@H]1c1ccccc1	C12H17NO	191.27	14	6	0.5	1	2	0	61.22	12.47	2.55	1.85	1.37	1.74	2.08	1.92	-2.44	0.69	0.00361	Soluble	-1.73	3.54	0.0185	Very soluble	-2.9	0.241	0.00126	Soluble	High	Yes	No	No	No	No	No	No	-6.15	0	0	0	0	1	0.55	0	0	1	2.52
ZINC22016976	C[C@H](CN1CCN(CCN(CCN(CC1)CC(=O)O)CC(=O)O)CC(=O)O)O	C17H32N4O7	404.46	28	0	0.82	8	11	4	115.44	145.09	1.44	-8.16	-3.68	-1.81	-2.24	-2.89	3.32	847000	2090	Highly soluble	5.87	300000000	741000	Highly soluble	1.03	4320	10.7	Soluble	Low	No	No	No	No	No	No	No	-14.56	1	1	1	1	2	0.55	0	0	2	3.62
ZINC22016981	C[C@@H](CN1CCN(CCN(CCN(CC1)CC(=O)O)CC(=O)O)CC(=O)O)O	C17H32N4O7	404.46	28	0	0.82	8	11	4	115.44	145.09	1.71	-8.16	-3.68	-1.81	-2.24	-2.84	3.32	847000	2090	Highly soluble	5.87	300000000	741000	Highly soluble	1.03	4320	10.7	Soluble	Low	No	No	No	No	No	No	No	-14.56	1	1	1	1	2	0.55	0	0	2	3.62
ZINC22116612	Oc1ccc(cc1)[C@H]1CNCCc2c1cc(O)c(c2Cl)O	C16H16ClNO3	305.76	21	12	0.25	1	4	4	86.16	72.72	2.23	2.39	2.35	2.11	2.92	2.4	-3.6	0.0771	0.000252	Soluble	-3.56	0.0845	0.000276	Soluble	-4.72	0.0058	1.9e-05	Moderately soluble	High	Yes	Yes	No	No	No	Yes	Yes	-6.47	0	0	0	0	0	0.55	1	1	0	3.11
ZINC22448696	O[C@H](CN1CCN(C[C@H]1C(=O)NC(C)(C)C)Cc1cccnc1)C[C@H](C(=O)N[C@@H]1[C@H](O)Cc2c1cccc2)Cc1ccccc1	C36H47N5O4	613.79	45	18	0.47	14	7	4	182.62	118.03	4.05	2.92	1.63	1.33	3.97	2.78	-4.86	0.00853	1.39e-05	Moderately soluble	-5.06	0.00535	8.71e-06	Moderately soluble	-8.44	2.25e-06	3.67e-09	Poorly soluble	High	No	Yes	No	No	No	No	No	-7.97	1	3	1	0	1	0.55	0	0	2	5.6
ZINC28467879	CO/N=C(/c1csc(n1)N)\C(=O)N[C@@H]1C(=O)N2[C@@H]1SCC(=C2C(=O)O)CSc1nc(=O)c(nn1C)O	C18H18N8O7S3	554.58	36	11	0.33	9	11	4	133.37	294.06	0.97	-0.95	-1.57	-1.21	-0.56	-0.67	-2.31	2.7	0.00488	Soluble	-4.74	0.0101	1.82e-05	Moderately soluble	-1.6	13.8	0.0249	Soluble	Low	No	No	No	No	No	No	No	-10.36	2	3	1	1	2	0.11	0	2	2	5.08
ZINC29319828	CCCCc1ncc(n1Cc1ccc(cc1)C(=O)O)/C=C(/C(=O)O)\Cc1cccs1	C23H24N2O4S	424.51	30	16	0.26	10	5	2	118.16	120.66	2.69	4.5	4.64	2.67	5.26	3.95	-5.04	0.00386	9.09e-06	Moderately soluble	-6.75	7.47e-05	1.76e-07	Poorly soluble	-5.86	0.000583	1.37e-06	Moderately soluble	Low	No	No	No	Yes	Yes	No	No	-5.69	0	0	0	0	0	0.56	0	1	3	3.86
ZINC33965961	OC(=O)CN([C@@H](C(=O)O)COCc1ccccc1)CCN(CC(=O)O)CCN(CC(=O)O)CC(=O)O	C22H31N3O11	513.5	36	6	0.5	20	14	5	122.14	205.45	1.64	-7.15	-1.25	-1.31	-1.15	-1.84	2.68	244000	476	Highly soluble	3.55	1840000	3580	Highly soluble	-0.92	61.9	0.121	Soluble	Low	No	Yes	No	No	No	No	No	-14.51	2	2	2	1	4	0.11	0	0	2	3.9
ZINC34676245	N[C@@H]1CON=C1O	C3H6N2O2	102.09	7	0	0.67	0	4	2	26.8	67.84	0.66	-0.93	-1.17	-1.28	0.04	-0.53	0.11	132	1.3	Highly soluble	-0.01	99.6	0.975	Very soluble	0.76	582	5.7	Soluble	High	No	No	No	No	No	No	No	-7.58	0	4	0	0	2	0.55	0	0	1	3.47
ZINC34781704	COC(=O)[C@H](c1ccccc1Cl)N1CCc2c(C1)ccs2	C16H16ClNO2S	321.82	21	11	0.31	4	3	0	88.96	57.78	3.36	3.75	2.82	2.93	4.62	3.5	-4.32	0.0154	4.77e-05	Moderately soluble	-4.66	0.00711	2.21e-05	Moderately soluble	-5.07	0.00275	8.53e-06	Moderately soluble	High	Yes	No	No	Yes	Yes	Yes	No	-5.6	0	0	0	0	0	0.55	0	0	1	3.21
ZINC35342787	CCN(C(=O)/C(=C/c1cc(O)c(c(c1)[N+](=O)[O-])O)/C#N)CC	C14H15N3O5	305.29	22	6	0.29	6	6	2	81.09	130.38	1.54	2.14	1.67	-0.13	-0.63	0.92	-2.89	0.396	0.0013	Soluble	-4.51	0.00944	3.09e-05	Moderately soluble	-1.66	6.68	0.0219	Soluble	High	No	No	No	No	No	No	No	-6.64	0	0	0	0	0	0.55	1	5	0	2.95
ZINC35653009	CC(=O)Oc1sc2c(c1)CN(CC2)[C@H](c1ccccc1F)C(=O)C1CC1	C20H20FNO3S	373.44	26	11	0.4	6	5	0	101.82	74.85	3.63	3.6	3.39	3.08	5.3	3.8	-4.34	0.0171	4.57e-05	Moderately soluble	-4.86	0.00517	1.38e-05	Moderately soluble	-5.25	0.00212	5.68e-06	Moderately soluble	High	Yes	No	No	Yes	Yes	Yes	Yes	-6.02	0	0	0	0	0	0.55	0	0	2	3.76
ZINC38212689	Fc1c[nH]c(=O)[nH]c1=O	C4H3FN2O2	130.08	9	6	0	0	3	2	27.64	65.72	0.44	-0.89	-0.38	-0.32	1.78	0.13	-0.58	34.3	0.264	Very soluble	-0.01	128	0.982	Very soluble	-1.71	2.54	0.0195	Soluble	High	No	No	No	No	No	No	No	-7.73	0	3	0	0	2	0.55	0	0	1	1.52
ZINC53683151	CC(C[C@H]1C(=O)N2CCC[C@H]2[C@]2(N1C(=O)[C@@](O2)(NC(=O)[C@H]1CN(C)[C@H]2C(=C1)c1cccc3c1c(C2)c([nH]3)Br)C(C)C)O)C	C32H40BrN5O5	654.59	43	9	0.59	6	6	3	177.59	118.21	4.13	4.78	2.05	2.01	3.05	3.2	-6.67	0.00014	2.14e-07	Poorly soluble	-6.99	6.64e-05	1.01e-07	Poorly soluble	-6.11	0.000514	7.85e-07	Poorly soluble	High	No	Yes	No	No	Yes	No	Yes	-6.9	1	3	0	0	1	0.55	0	0	2	6.39
ZINC60325170	Ic1ccc(c(c1)F)Nc1c(ccc(c1F)F)C(=O)N1CC(C1)(O)[C@@H]1CCCCN1	C21H21F3IN3O2	531.31	30	12	0.38	5	6	3	122.92	64.6	3.36	3.88	4.28	4.08	4.71	4.06	-5.54	0.00152	2.85e-06	Moderately soluble	-4.93	0.00618	1.16e-05	Moderately soluble	-7.28	2.81e-05	5.28e-08	Poorly soluble	High	Yes	Yes	Yes	No	No	Yes	Yes	-6.79	1	1	0	0	0	0.55	0	1	2	3.66
ZINC95	C[NH+](CCO[C@@H](c1ccc(cc1)Br)c1ccccc1)C	C17H21BrNO+	335.26	20	12	0.29	6	1	1	88.06	13.67	3.6	3.96	2.38	0.1	4.13	2.83	-4.46	0.0116	3.46e-05	Moderately soluble	-3.95	0.0378	0.000113	Soluble	-6.45	0.00012	3.58e-07	Poorly soluble	High	Yes	No	Yes	No	No	Yes	No	-5.53	0	0	0	0	0	0.55	0	0	1	2.86
ZINC104	N#Cc1ccccc1OC[C@@H](C[NH2+]C(C)(C)C)O	C14H21N2O2+	249.33	18	6	0.5	6	3	2	71.75	69.86	2.61	1.91	0.66	-2.57	2.16	0.96	-2.44	0.906	0.00363	Soluble	-3	0.249	0.000999	Soluble	-3.77	0.0419	0.000168	Soluble	High	No	No	No	No	No	No	No	-6.46	0	0	0	0	0	0.55	0	0	1	2.72
ZINC106	O[C@H](COc1cc(C)ccc1Cl)C[NH2+]C(C)(C)C	C14H23ClNO2+	272.79	18	6	0.57	6	2	2	77.01	46.07	3.32	2.8	1.75	-1.1	3.29	2.01	-3.15	0.195	0.000715	Soluble	-3.42	0.103	0.000377	Soluble	-4.69	0.00562	2.06e-05	Moderately soluble	High	Yes	No	Yes	No	No	No	No	-5.98	0	0	0	0	0	0.55	0	0	0	2.73
ZINC136	O[C@H](COC(=O)N)COc1ccc(cc1)Cl	C10H12ClNO4	245.66	16	6	0.3	6	4	2	57.91	81.78	1.99	1.36	1.17	0.96	1	1.3	-2.1	1.95	0.00792	Soluble	-2.68	0.513	0.00209	Soluble	-2.37	1.04	0.00424	Soluble	High	No	No	No	No	No	No	No	-6.83	0	0	0	0	0	0.55	0	0	1	2.47
ZINC145	c1ccc(cc1)C1(C[C@@H]1C1=[NH+]CCN1)c1ccccc1	C18H19N2+	263.36	20	12	0.28	3	0	2	90.28	26	2.59	2.74	0.31	3.74	4.68	2.81	-3.45	0.0945	0.000359	Soluble	-2.94	0.302	0.00115	Soluble	-6.42	0.0001	3.8e-07	Poorly soluble	High	No	Yes	No	No	No	Yes	No	-5.96	0	0	0	0	0	0.55	0	0	0	3.27
ZINC163	[O-]C(=O)[C@H]1CCc2c1cc(Cl)c(c2)C1CCCCC1	C16H18ClO2-	277.77	19	6	0.56	2	2	0	75.6	40.13	2.68	4.97	3.17	4.02	4.37	3.84	-4.79	0.00445	1.6e-05	Moderately soluble	-5.55	0.000781	2.81e-06	Moderately soluble	-4.42	0.0105	3.79e-05	Moderately soluble	High	Yes	No	Yes	Yes	Yes	No	No	-4.47	0	0	0	0	0	0.85	0	0	1	3.01
ZINC268	CCOC(=O)[C@@]1(CCC[NH+](CC1)C)c1ccccc1	C16H24NO2+	262.37	19	6	0.56	4	2	1	81.5	30.74	2.99	3.08	0.81	-1.06	3.09	1.78	-3.38	0.11	0.00042	Soluble	-3.39	0.106	0.000405	Soluble	-4.26	0.0144	5.5e-05	Moderately soluble	High	Yes	No	No	No	No	No	No	-5.71	0	0	0	0	0	0.55	0	0	0	3.1
ZINC276	CCC[NH+]([C@H](C(=O)Nc1c(C)cccc1C)CC)CC	C17H29N2O+	277.42	20	6	0.59	8	1	2	88.49	33.54	3.38	3.69	2.14	-0.56	3.69	2.47	-3.58	0.0732	0.000264	Soluble	-4.08	0.0228	8.23e-05	Moderately soluble	-5.34	0.00128	4.61e-06	Moderately soluble	High	Yes	Yes	Yes	No	No	No	No	-5.37	0	0	0	0	0	0.55	0	0	2	2.92
ZINC294	CC[NH2+][C@H](Cc1cccc(c1)C(F)(F)F)C	C12H17F3N+	232.27	16	6	0.5	5	3	1	59.7	16.61	2.95	3.36	3.37	0.05	3.8	2.71	-3.34	0.105	0.000453	Soluble	-3.39	0.0953	0.000411	Soluble	-4.97	0.00246	1.06e-05	Moderately soluble	High	Yes	No	Yes	No	No	No	No	-5.33	0	0	0	0	1	0.55	0	0	1	2.1
ZINC363	C[N+]1(C)CCN(CC1)C[C@@](c1ccccc1)(C1CCCCC1)O	C20H33N2O+	317.49	23	6	0.7	4	2	1	105.39	23.47	0.08	3.13	1.98	-0.84	0.46	0.96	-3.71	0.062	0.000195	Soluble	-3.29	0.162	0.00051	Soluble	-4.97	0.00343	1.08e-05	Moderately soluble	High	Yes	Yes	No	No	No	No	Yes	-6.01	0	0	0	0	0	0.55	0	1	0	3
ZINC407	C[C@@H]([NH2+][C@H]([C@H](c1ccc(cc1)O)O)C)COc1ccccc1	C18H24NO3+	302.39	22	12	0.33	7	3	3	88.7	66.3	2.68	2.82	1.52	-1.48	2.86	1.68	-3.43	0.112	0.000369	Soluble	-3.87	0.0408	0.000135	Soluble	-4.87	0.00408	1.35e-05	Moderately soluble	High	Yes	Yes	No	No	No	No	No	-6.14	0	0	0	0	0	0.55	0	0	0	3.07
ZINC450	OC[C@H](COc1ccccc1C)O	C10H14O3	182.22	13	6	0.4	4	3	2	49.84	49.69	1.77	1.41	0.73	0.95	1.58	1.29	-1.94	2.11	0.0116	Very soluble	-2.06	1.59	0.00875	Soluble	-2.23	1.07	0.00585	Soluble	High	Yes	No	No	No	No	No	No	-6.41	0	0	0	0	1	0.55	0	0	1	2.18
ZINC452	COc1ccccc1OC[C@@H]1CNC(=O)O1	C11H13NO4	223.23	16	6	0.36	4	4	1	60.12	56.79	1.85	1.42	0.8	0.57	1.4	1.21	-2.13	1.65	0.00738	Soluble	-2.22	1.35	0.00606	Soluble	-2.96	0.246	0.0011	Soluble	High	Yes	No	No	No	No	No	No	-6.65	0	0	0	0	0	0.55	0	0	1	2.68
ZINC478	CC[C@H](C(C(=O)[O-])(C)C)c1ccc2c(c1)ccc(c2)OC	C18H21O3-	285.36	21	10	0.39	5	3	0	83.82	49.36	2.78	4.7	3.12	3.56	4.13	3.66	-4.59	0.00729	2.56e-05	Moderately soluble	-5.46	0.000978	3.43e-06	Moderately soluble	-5.23	0.00167	5.85e-06	Moderately soluble	High	Yes	No	No	No	No	Yes	No	-4.7	0	0	0	0	0	0.85	0	0	1	2.15
ZINC480	C[NH+]1CC[C@@H](C1)CN1c2ccccc2Sc2c1cccc2	C18H21N2S+	297.44	21	12	0.33	2	0	1	97.64	32.98	3.21	5.23	2.06	0.4	3.37	2.85	-5.27	0.0016	5.37e-06	Moderately soluble	-5.67	0.000635	2.13e-06	Moderately soluble	-5.35	0.00132	4.45e-06	Moderately soluble	High	Yes	Yes	Yes	Yes	Yes	Yes	No	-4.4	0	0	0	0	1	0.55	1	0	1	3.81
ZINC487	C[NH2+][C@H](Cc1ccccc1OC)C	C11H18NO+	180.27	13	6	0.45	4	1	1	56.38	25.84	2.62	2.65	0.82	-1.56	2.38	1.38	-2.7	0.356	0.00197	Soluble	-2.84	0.258	0.00143	Soluble	-3.8	0.0284	0.000157	Soluble	High	Yes	No	No	No	No	No	No	-5.52	0	0	0	0	1	0.55	0	0	1	1.91
ZINC512	CCc1c(C)[nH]c2c1C(=O)[C@H](CC2)C[NH+]1CCOCC1	C16H25N2O2+	277.38	20	5	0.69	3	2	2	84.16	46.53	2.85	1.74	0.16	-2.68	3.77	1.17	-2.64	0.631	0.00228	Soluble	-2.33	1.29	0.00464	Soluble	-4.14	0.02	7.19e-05	Moderately soluble	High	No	Yes	Yes	No	No	No	No	-6.76	0	0	0	0	0	0.55	0	0	0	3.25
ZINC582	C[NH+](C[C@H](CN1c2ccccc2S(=O)(=O)c2c1cccc2)C)C	C18H23N2O2S+	331.45	23	12	0.33	4	2	1	97.51	50.2	2.97	2.51	2.45	-0.68	2.25	1.9	-3.6	0.0836	0.000252	Soluble	-3.21	0.204	0.000617	Soluble	-5.5	0.00105	3.18e-06	Moderately soluble	High	Yes	No	Yes	No	No	No	No	-6.54	0	0	0	0	0	0.55	1	0	0	3.92
ZINC591	O=C1N=C(O[C@H]1c1ccccc1)N	C9H8N2O2	176.17	13	6	0.11	1	3	1	49.91	64.68	1.07	0.9	-0.11	0.99	1.49	0.87	-1.77	2.96	0.0168	Very soluble	-1.84	2.53	0.0143	Very soluble	-2.3	0.889	0.00505	Soluble	High	No	No	No	No	No	No	No	-6.74	0	0	0	0	1	0.55	0	0	1	3.15
ZINC602	CCOc1ccc(cc1)NC(=O)C	C10H13NO2	179.22	13	6	0.3	4	2	1	52.05	38.33	2.1	1.58	1.85	1.54	1.74	1.76	-2.02	1.7	0.00946	Soluble	-2	1.81	0.0101	Very soluble	-3.32	0.0866	0.000483	Soluble	High	Yes	No	Yes	No	No	No	No	-6.27	0	0	0	0	1	0.55	0	0	1	1.13
ZINC609	C[C@H]1[NH2+]CCO[C@@H]1c1ccccc1	C11H16NO+	178.25	13	6	0.45	1	1	1	57.29	25.84	2.17	1.38	0	-2.22	2.2	0.71	-2.09	1.45	0.00813	Soluble	-1.53	5.31	0.0298	Very soluble	-3.22	0.107	0.0006	Soluble	High	No	No	Yes	No	No	No	No	-6.41	0	0	0	0	1	0.55	0	0	1	2.45
ZINC610	ClCC[NH+]([C@@H](COc1ccccc1)C)Cc1ccccc1	C18H23ClNO+	304.83	21	12	0.33	8	1	1	90.41	13.67	3.3	4.45	2.63	0.22	4.35	2.99	-4.43	0.0114	3.73e-05	Moderately soluble	-4.46	0.0107	3.5e-05	Moderately soluble	-6.65	6.84e-05	2.24e-07	Poorly soluble	High	Yes	Yes	Yes	No	No	Yes	No	-5	0	0	0	0	0	0.55	0	1	2	2.89
ZINC633	OC(c1ccccc1)(c1ccccc1)[C@@H]1CCCC[NH2+]1	C18H22NO+	268.37	20	12	0.33	3	1	2	86.54	36.84	2.84	3.04	1.55	-0.68	3.55	2.06	-3.67	0.058	0.000216	Soluble	-3.48	0.089	0.000332	Soluble	-5.6	0.000677	2.52e-06	Moderately soluble	High	Yes	Yes	Yes	No	No	No	No	-5.78	0	0	0	0	0	0.55	0	0	0	2.53
ZINC654	[O-]C(=O)[C@H](c1ccc2c(c1)Cc1c(O2)nccc1)C	C15H12NO3-	254.26	19	12	0.2	2	4	0	68.17	62.25	1.87	2.75	1.63	2.22	2.95	2.28	-3.48	0.0834	0.000328	Soluble	-3.71	0.0493	0.000194	Soluble	-4.37	0.0109	4.29e-05	Moderately soluble	High	Yes	No	No	Yes	No	No	No	-5.9	0	0	0	0	0	0.85	0	0	0	3.18
ZINC797	COc1cc(/C=C/C(=O)Nc2ccccc2C(=O)[O-])ccc1OC	C18H16NO5-	326.32	24	12	0.11	7	5	1	88.37	87.69	2.67	3.2	1.42	2.08	2.71	2.42	-3.79	0.0533	0.000163	Soluble	-4.71	0.00631	1.93e-05	Moderately soluble	-4.61	0.00803	2.46e-05	Moderately soluble	High	No	No	No	Yes	No	No	Yes	-6.02	0	0	0	0	0	0.56	0	1	0	2.54
ZINC811	COc1cc(cc(c1OC)OC)C(=O)N1CCOCC1	C14H19NO5	281.3	20	6	0.5	5	5	0	76.32	57.23	2.79	0.92	0.8	0.29	1.85	1.33	-2.06	2.47	0.0088	Soluble	-1.71	5.51	0.0196	Very soluble	-2.91	0.344	0.00122	Soluble	High	Yes	Yes	No	No	No	No	No	-7.36	0	0	0	0	0	0.55	0	0	0	2.19
ZINC1003	CC(=O)Nc1ccc(cc1)OC(=O)c1ccccc1OC(=O)C	C17H15NO5	313.3	23	12	0.12	7	5	1	83.65	81.7	2.65	2.15	2.6	2.66	2.52	2.51	-3.06	0.272	0.000869	Soluble	-3.5	0.0995	0.000318	Soluble	-5.05	0.00279	8.91e-06	Moderately soluble	High	No	No	Yes	Yes	No	No	No	-6.68	0	0	0	0	0	0.55	0	1	0	2.16
ZINC1041	CC[N+](Cc1ccccc1Br)(C)C	C11H17BrN+	243.16	13	6	0.45	3	0	0	60.71	0	-0.81	2.83	2.89	-0.22	0.36	1.01	-3.27	0.129	0.000532	Soluble	-2.49	0.791	0.00325	Soluble	-5.28	0.00127	5.22e-06	Moderately soluble	Low	Yes	Yes	Yes	No	No	No	No	-5.77	0	0	0	0	1	0.55	0	1	1	1.43
ZINC1091	CCOC(=O)n1ccn(c1=S)C	C7H10N2O2S	186.23	12	5	0.43	3	2	0	47.07	68.25	2.18	0.66	1.56	0.24	1.06	1.14	-1.52	5.61	0.0301	Very soluble	-1.67	3.99	0.0214	Very soluble	-0.56	50.7	0.272	Soluble	High	Yes	No	No	No	No	No	No	-6.97	0	0	0	0	1	0.55	0	1	1	2.18
ZINC1100	O[C@H]([C@@H]([NH3+])C)c1ccccc1	C9H14NO+	152.21	11	6	0.33	2	1	2	46.15	47.87	1.54	0.83	0.03	-2.42	1.15	0.22	-1.58	4.02	0.0264	Very soluble	-1.42	5.82	0.0382	Very soluble	-1.93	1.79	0.0118	Soluble	High	No	No	No	No	No	No	No	-6.64	0	1	0	0	1	0.55	0	0	1	1.65
ZINC1131	Clc1cc(Cl)c2c(c1O)nccc2	C9H5Cl2NO	214.05	13	10	0	0	2	1	53.79	33.12	2.03	3.51	3.25	2.32	3.21	2.86	-3.95	0.0241	0.000113	Soluble	-3.89	0.0276	0.000129	Soluble	-4.37	0.00924	4.32e-05	Moderately soluble	High	Yes	No	Yes	No	No	No	No	-5.11	0	1	0	0	0	0.55	0	0	2	1.53
ZINC1207	CCc1sc2c(c1)C(=NCC(=O)N2C)c1ccccc1Cl	C16H15ClN2OS	318.82	21	11	0.25	2	2	0	95.6	60.91	3.13	3.49	3.02	2.71	5.62	3.59	-4.27	0.0171	5.36e-05	Moderately soluble	-4.45	0.0113	3.53e-05	Moderately soluble	-6.05	0.000286	8.97e-07	Poorly soluble	High	Yes	No	Yes	Yes	Yes	No	Yes	-5.77	0	0	0	0	0	0.55	0	0	0	3.31
ZINC1233	Clc1ccc(cc1)N1C(=NC(=NC1(C)C)N)N	C11H14ClN5	251.72	17	6	0.27	1	2	2	80.38	80	2.11	1.03	0.38	1.57	1.67	1.35	-2.24	1.43	0.00569	Soluble	-2.3	1.26	0.00501	Soluble	-3.3	0.127	0.000505	Soluble	High	No	No	Yes	No	No	No	No	-7.1	0	0	0	0	0	0.55	0	0	0	3.27
ZINC1266	C[C@@H](C1=[NH+]CCN1)Oc1c(Cl)cccc1Cl	C11H13Cl2N2O+	260.14	16	6	0.36	3	1	2	74.76	35.23	2.41	2.58	0.08	2.66	3.89	2.33	-3.16	0.181	0.000695	Soluble	-2.97	0.28	0.00108	Soluble	-4.72	0.00491	1.89e-05	Moderately soluble	High	No	No	Yes	No	No	Yes	No	-6.06	0	0	0	0	0	0.55	0	0	0	3.37
ZINC1275	C[NH+](CCn1c2ccccc2n(c2c(c1=O)cccc2)C)C	C18H22N3O+	296.39	22	15	0.28	3	1	1	93.62	31.37	2.98	2.5	1.2	-0.79	2.19	1.61	-3.56	0.0818	0.000276	Soluble	-2.8	0.465	0.00157	Soluble	-4.98	0.00308	1.04e-05	Moderately soluble	High	Yes	No	Yes	No	No	Yes	No	-6.33	0	0	0	0	0	0.55	0	0	0	2.78
ZINC1290	CC/C(=C(\c1ccc(cc1)O)/CC)/c1ccc(cc1)O	C18H20O2	268.35	20	12	0.22	4	2	2	85.09	40.46	2.74	5.07	4.83	3.86	4.25	4.15	-4.88	0.00355	1.32e-05	Moderately soluble	-5.66	0.000584	2.18e-06	Moderately soluble	-5.44	0.000977	3.64e-06	Moderately soluble	High	Yes	No	Yes	Yes	Yes	Yes	Yes	-4.34	0	0	0	0	1	0.55	0	1	1	2.35
ZINC1349	CCOc1c(cnn(c1=O)C)N1CCOCC1	C11H17N3O3	239.27	17	6	0.64	3	4	0	66.78	56.59	2.47	-0.02	-0.37	0.16	0.77	0.6	-1.37	10.1	0.0423	Very soluble	-0.72	45.7	0.191	Very soluble	-1.85	3.4	0.0142	Soluble	High	No	No	No	No	No	No	No	-7.77	0	0	0	0	0	0.55	0	0	1	2.88
ZINC1380	CCN(S(=O)(=O)c1ccc(cc1)C(=O)[O-])CC	C11H14NO4S-	256.3	17	6	0.36	5	5	0	61.87	85.89	1.55	2.16	1.16	1.2	0.42	1.3	-2.72	0.487	0.0019	Soluble	-3.6	0.0649	0.000253	Soluble	-2.62	0.613	0.00239	Soluble	High	No	No	No	No	No	No	No	-6.33	0	0	0	0	0	0.56	0	0	0	1.97
ZINC1385	C#CC1(CCCCC1)OC(=O)N	C9H13NO2	167.21	12	0	0.67	2	2	1	45.84	52.32	1.81	1.26	1.5	1.3	1.22	1.42	-1.54	4.84	0.0289	Very soluble	-1.96	1.84	0.011	Very soluble	-0.94	19.2	0.115	Soluble	High	Yes	No	No	No	No	No	No	-6.43	0	0	0	0	1	0.55	0	1	1	2.73
ZINC1441	O=C1NCC2(O1)CC[NH+](CC2)CCc1ccccc1	C15H21N2O2+	261.34	19	6	0.53	3	2	2	81.84	42.77	2.44	2.08	-0.38	-1.75	2.3	0.94	-2.81	0.408	0.00156	Soluble	-2.61	0.645	0.00247	Soluble	-4.16	0.0183	7e-05	Moderately soluble	High	No	Yes	No	No	No	No	No	-6.42	0	0	0	0	0	0.55	0	0	0	3.52
ZINC1457	OC[C@@H]1O[C@@H](C[C@H]1O)n1cc(F)c(=O)[nH]c1=O	C9H11FN2O5	246.19	17	6	0.56	2	6	3	53.07	104.55	1.05	-1.16	-1.59	-0.62	-0.07	-0.48	-0.76	42.3	0.172	Very soluble	-0.54	70.5	0.286	Very soluble	-0.34	113	0.457	Soluble	High	No	No	No	No	No	No	No	-8.63	0	1	0	0	0	0.55	0	0	1	3.61
ZINC1579	CC(NNC(=O)c1ccncc1)C	C9H13N3O	179.22	13	6	0.33	4	3	2	49.65	54.02	1.38	0.37	0.72	0.53	0.59	0.72	-1.26	9.81	0.0547	Very soluble	-1.07	15.3	0.0852	Very soluble	-2.9	0.227	0.00126	Soluble	High	Yes	No	No	No	No	No	No	-7.13	0	0	0	0	1	0.55	0	0	1	1.77
ZINC1586	CC(COC(=O)c1ccc(cc1)N)C	C11H15NO2	193.24	14	6	0.36	4	2	1	56.55	52.32	2.28	2.82	2.09	2.23	1.87	2.26	-2.87	0.262	0.00136	Soluble	-3.58	0.0513	0.000265	Soluble	-2.96	0.213	0.0011	Soluble	High	Yes	No	Yes	No	No	No	No	-5.48	0	0	0	0	1	0.55	0	1	1	1.47
ZINC1624	O[C@H](c1ccccc1)C[C@@H]1CCC[C@@H]([NH+]1C)CC(=O)c1ccccc1	C22H28NO2+	338.46	25	12	0.41	6	2	2	106.4	41.74	3.11	3.76	2.11	-0.74	4.01	2.45	-4.27	0.0183	5.41e-05	Moderately soluble	-4.33	0.0158	4.68e-05	Moderately soluble	-5.76	0.000581	1.72e-06	Moderately soluble	High	Yes	Yes	Yes	No	No	No	No	-5.7	0	0	0	0	0	0.55	0	0	1	3.41
ZINC1639	Clc1ccc2c(c1)C(=Nc1c(O2)cccc1)N1CC[NH+](CC1)C	C18H19ClN3O+	328.82	23	12	0.28	1	2	1	105.05	29.27	3.28	3.22	1.21	-0.1	3.63	2.25	-4.23	0.0195	5.92e-05	Moderately soluble	-3.51	0.102	0.000311	Soluble	-5.72	0.000627	1.91e-06	Moderately soluble	High	Yes	Yes	Yes	No	Yes	Yes	Yes	-6.02	0	0	0	0	0	0.55	0	0	0	4.16
ZINC1677	O=C1C=C(C)C(=O)c2c1cccc2	C11H8O2	172.18	13	6	0.09	0	2	0	49.05	34.14	1.74	2.2	2.01	1.2	2.72	1.98	-2.64	0.399	0.00232	Soluble	-2.55	0.484	0.00281	Soluble	-3.42	0.0659	0.000383	Soluble	High	Yes	No	Yes	No	No	No	No	-5.79	0	0	0	0	1	0.55	1	0	1	2.37
ZINC1732	Clc1ccc2c(c1)C(=NCc1n2c(C)nc1)c1ccccc1F	C18H13ClFN3	325.77	23	17	0.11	1	3	0	92.81	30.18	2.82	2.48	4.21	3.41	5.12	3.61	-3.9	0.0407	0.000125	Soluble	-2.76	0.568	0.00174	Soluble	-7.29	1.69e-05	5.18e-08	Poorly soluble	High	Yes	Yes	Yes	Yes	No	No	Yes	-6.53	0	0	0	0	0	0.55	0	0	0	3.37
ZINC1874	CC[NH+](CCc1onc(n1)c1ccccc1)CC	C14H20N3O+	246.33	18	11	0.43	6	3	1	72.89	43.36	3.45	2.87	1.2	-1.87	2.86	1.7	-3.23	0.145	0.000587	Soluble	-3.44	0.0894	0.000363	Soluble	-5.12	0.00187	7.6e-06	Moderately soluble	High	Yes	No	No	No	No	No	No	-5.76	0	0	0	0	0	0.55	0	0	1	3.03
ZINC1875	CCn1cc(C(=O)[O-])c(=O)c2c1cc1OCOc1c2	C13H10NO5-	260.22	19	10	0.23	2	5	0	65.36	80.59	1.65	0.94	0.11	0.56	1.66	0.98	-2.3	1.3	0.00498	Soluble	-2.22	1.57	0.00604	Soluble	-2.7	0.514	0.00198	Soluble	High	No	No	Yes	No	No	No	No	-7.22	0	0	0	0	0	0.56	0	0	0	2.22
ZINC1890	CCC(=O)c1ccc(cc1)O	C9H10O2	150.17	11	6	0.22	2	2	1	43.47	37.3	1.59	2.03	1.98	1.44	2.01	1.81	-2.32	0.716	0.00477	Soluble	-2.44	0.544	0.00362	Soluble	-2.54	0.429	0.00286	Soluble	High	Yes	No	Yes	No	No	No	No	-5.77	0	1	0	0	1	0.55	0	0	1	1
ZINC1898	O[C@H](COc1ccccc1C1CCCC1)C[NH2+]C(C)(C)C	C18H30NO2+	292.44	21	6	0.67	7	2	2	89.12	46.07	3.6	4.15	2.45	-1.03	3.72	2.58	-4.02	0.0281	9.62e-05	Moderately soluble	-4.83	0.00437	1.5e-05	Moderately soluble	-4.83	0.0043	1.47e-05	Moderately soluble	High	Yes	No	No	No	No	Yes	No	-5.14	0	0	0	0	0	0.55	0	0	1	3.15
ZINC1920	C[C@H]1[NH+](C)CCO[C@@H]1c1ccccc1	C12H18NO+	192.28	14	6	0.5	1	1	1	62.19	13.67	2.55	1.85	-0.04	-1.94	2.08	0.9	-2.45	0.684	0.00356	Soluble	-1.76	3.36	0.0175	Very soluble	-2.9	0.243	0.00126	Soluble	Low	No	No	Yes	No	No	No	No	-6.16	0	0	0	0	1	0.55	0	0	1	2.74
ZINC1925	O=C1c2ccccc2C(=C1c1ccccc1)O	C15H10O2	222.24	17	12	0	1	2	1	66.66	37.3	1.99	2.93	3.31	2.12	3.42	2.75	-3.52	0.0671	0.000302	Soluble	-3.37	0.0937	0.000422	Soluble	-5.04	0.00205	9.23e-06	Moderately soluble	High	Yes	No	Yes	Yes	No	No	No	-5.58	0	0	0	0	0	0.85	1	1	1	2.78
ZINC1927	[NH3+][C@@H](C(=O)[O-])Cc1ccccc1	C9H11NO2	165.19	12	6	0.22	3	2	1	44.82	67.77	1.04	-1.52	-1.41	-2.58	0.86	-0.72	-0.08	138	0.835	Very soluble	0.6	662	4.01	Highly soluble	-1.86	2.3	0.0139	Soluble	High	No	No	No	No	No	No	No	-8.39	0	1	0	0	1	0.55	0	0	1	1.46
ZINC1971	Clc1ccc2c(c1)C(=NCC(=O)N2CC1CC1)c1ccccc1	C19H17ClN2O	324.8	23	12	0.26	3	2	0	100.26	32.67	3.07	3.73	3.11	3.37	4.94	3.64	-4.39	0.0132	4.06e-05	Moderately soluble	-4.11	0.0253	7.8e-05	Moderately soluble	-6.6	8.18e-05	2.52e-07	Poorly soluble	High	Yes	No	Yes	Yes	Yes	Yes	Yes	-5.63	0	0	0	0	0	0.55	0	0	1	3.14
ZINC2033	CCn1nc(c2c1C(=NCC(=O)N2)c1ccccc1)C	C15H16N4O	268.31	20	11	0.27	2	3	1	84.86	59.28	2.2	1.76	1.05	1.08	2.85	1.79	-2.89	0.348	0.0013	Soluble	-2.62	0.64	0.00239	Soluble	-4.91	0.00329	1.23e-05	Moderately soluble	High	Yes	No	Yes	No	No	No	No	-6.69	0	0	0	0	0	0.55	0	0	0	3.21
ZINC2062	Oc1ccccc1C(=O)Oc1ccccc1C(=O)[O-]	C14H9O5-	257.22	19	12	0	4	5	1	64.88	86.66	1.71	3.04	0.97	2.39	1.84	1.99	-3.55	0.0719	0.00028	Soluble	-4.53	0.00767	2.98e-05	Moderately soluble	-3.41	0.101	0.000393	Soluble	High	No	No	No	No	No	No	No	-5.71	0	0	0	0	0	0.56	0	1	0	2
ZINC2070	Fc1cc2[C@]3(CCOc2cc1)NC(=O)NC3=O	C11H9FN2O3	236.2	17	6	0.27	0	4	2	62.16	67.43	1.39	0.78	0.19	1.03	1.55	0.99	-2.06	2.07	0.00877	Soluble	-1.78	3.95	0.0167	Very soluble	-3.67	0.0499	0.000211	Soluble	High	No	Yes	No	No	No	No	No	-7.19	0	0	0	0	0	0.55	0	1	1	3.27
ZINC2094	COc1c(OC)ncnc1NS(=O)(=O)c1ccc(cc1)N	C12H14N4O4S	310.33	21	12	0.17	5	6	2	76.53	124.81	1.86	0.7	1.77	-0.67	-0.2	0.69	-2.3	1.56	0.00504	Soluble	-2.9	0.392	0.00126	Soluble	-4.03	0.0291	9.38e-05	Moderately soluble	High	No	No	No	No	No	No	No	-7.7	0	0	0	0	0	0.55	0	1	0	2.99
ZINC2114	Nc1ccc(cc1)S(=O)(=O)N(c1onc(c1C)C)C(=O)C	C13H15N3O4S	309.34	21	11	0.23	4	5	1	77.86	114.88	1.73	1.27	2.7	0.22	0.48	1.28	-2.68	0.644	0.00208	Soluble	-3.28	0.162	0.000523	Soluble	-3.75	0.0545	0.000176	Soluble	High	No	No	No	No	No	No	No	-7.29	0	0	0	0	0	0.55	0	1	0	3.05
ZINC2119	O=S1(=O)CCCCN1c1ccc(cc1)S(=O)(=O)N	C10H14N2O4S2	290.36	18	6	0.4	2	5	1	71.04	114.3	0.71	0.12	2.04	-0.38	-0.7	0.36	-1.83	4.29	0.0148	Very soluble	-2.08	2.44	0.00839	Soluble	-2.33	1.36	0.0047	Soluble	High	No	No	No	No	No	No	No	-7.99	0	0	0	0	0	0.55	0	0	0	2.6
ZINC2200	COc1cccc(c1)[C@]1(O)CCCC[C@H]1C[NH+](C)C	C16H26NO2+	264.38	19	6	0.62	4	2	2	79.44	33.9	3.15	2.55	1.11	-1.51	2.69	1.6	-3.06	0.233	0.00088	Soluble	-2.91	0.326	0.00123	Soluble	-3.89	0.0338	0.000128	Soluble	High	Yes	No	No	No	No	No	No	-6.1	0	0	0	0	0	0.55	0	0	0	2.94
ZINC2234	[NH3+][C@@H](C(=O)[O-])Cc1ccc(cc1)O	C9H11NO3	181.19	13	6	0.22	3	3	2	46.84	88	0.86	-2.26	-1.7	-3.16	0.39	-1.17	0.32	376	2.07	Highly soluble	0.95	1600	8.83	Highly soluble	-1.29	9.29	0.0513	Soluble	High	No	No	No	No	No	No	No	-9.01	0	1	0	0	2	0.55	0	0	1	1.54
ZINC2238	CCCC(C(=O)N)CCC	C8H17NO	143.23	10	0	0.88	5	1	1	43.48	43.09	1.95	2.1	1.69	1.55	1.36	1.73	-1.72	2.72	0.019	Very soluble	-2.64	0.332	0.00232	Soluble	-1.89	1.86	0.013	Soluble	High	Yes	No	No	No	No	No	No	-5.68	0	1	0	0	1	0.55	0	0	1	1.11
ZINC2264	Clc1ccc2c(c1)C(=Cc1c(S2)cccc1)OCC[NH+](C)C	C18H19ClNOS+	332.87	22	12	0.22	4	1	1	95.41	38.97	3.92	4.84	3.35	0.28	4.44	3.37	-5.09	0.00269	8.08e-06	Moderately soluble	-5.39	0.00135	4.05e-06	Moderately soluble	-6.58	8.84e-05	2.65e-07	Poorly soluble	High	Yes	No	Yes	No	Yes	Yes	No	-4.89	0	0	0	0	0	0.55	0	1	1	3.4
ZINC3723	C=CCN(c1c(Cl)cccc1Cl)C1=[NH+]CCN1	C12H14Cl2N3+	271.17	17	6	0.25	4	0	2	82	29.24	2.69	2.69	0.26	3.25	3.64	2.51	-3.21	0.166	0.000612	Soluble	-2.96	0.3	0.0011	Soluble	-4.73	0.00503	1.85e-05	Moderately soluble	High	No	No	Yes	Yes	No	No	No	-6.04	0	0	0	0	0	0.55	0	1	0	3.2
ZINC4759	CC(C[C@H](C1(CCC1)c1ccc(cc1)Cl)[NH+](C)C)C	C17H27ClN+	280.86	19	6	0.65	5	0	1	86.41	4.44	3.73	5.43	3.32	0.78	4.85	3.62	-4.91	0.00349	1.24e-05	Moderately soluble	-5.28	0.00148	5.26e-06	Moderately soluble	-5.5	0.000898	3.2e-06	Moderately soluble	High	Yes	No	No	No	No	Yes	No	-4.16	0	0	0	0	2	0.55	0	0	1	2.61
ZINC4760	O[C@](c1ccccc1)(C1CCCCC1)CC[NH+]1CCCC1	C19H30NO+	288.45	21	6	0.68	5	1	2	93.68	24.67	3.63	4.13	2.03	-0.19	3.99	2.72	-4.11	0.0223	7.73e-05	Moderately soluble	-4.35	0.0127	4.42e-05	Moderately soluble	-4.56	0.00802	2.78e-05	Moderately soluble	High	Yes	No	No	No	No	Yes	No	-5.13	0	0	0	0	0	0.55	0	0	1	2.69
ZINC5191	COc1cc(OC)cc(c1C(=O)CCC[NH+]1CCCC1)OC	C17H26NO4+	308.39	22	6	0.59	8	4	1	90.61	49.2	3.38	2.34	0.97	-2.5	3.38	1.51	-2.9	0.388	0.00126	Soluble	-3.01	0.3	0.000971	Soluble	-4.38	0.013	4.22e-05	Moderately soluble	High	Yes	Yes	No	No	No	No	No	-6.52	0	0	0	0	0	0.55	0	0	1	2.37
ZINC5626	C[C@H](C1=[NH+]CCN1)Oc1c(Cl)cccc1Cl	C11H13Cl2N2O+	260.14	16	6	0.36	3	1	2	74.76	35.23	2.28	2.58	0.08	2.66	3.89	2.3	-3.16	0.181	0.000695	Soluble	-2.97	0.28	0.00108	Soluble	-4.72	0.00491	1.89e-05	Moderately soluble	High	No	No	Yes	No	No	Yes	No	-6.06	0	0	0	0	0	0.55	0	0	0	3.37
ZINC7455	O=C1OCC(=C1c1ccccc1)c1ccc(cc1)S(=O)(=O)C	C17H14O4S	314.36	22	12	0.12	3	4	0	83.69	68.82	2.13	2.27	3.64	2.62	3.27	2.79	-3.42	0.118	0.000376	Soluble	-3.35	0.14	0.000445	Soluble	-5.92	0.000381	1.21e-06	Moderately soluble	High	Yes	No	Yes	Yes	Yes	No	No	-6.61	0	0	0	0	0	0.55	0	1	0	2.82
ZINC8496	C[NH2+][C@@H]1Cc2c(CC1)[nH]c1c2cc(cc1)C(=O)N	C14H18N3O+	244.31	18	9	0.36	2	1	3	72.69	75.49	1.68	1.25	0.32	-2.45	2.31	0.62	-2.38	1.02	0.00417	Soluble	-2.43	0.9	0.00368	Soluble	-4.2	0.0155	6.35e-05	Moderately soluble	High	No	Yes	Yes	No	No	No	No	-6.9	0	0	0	0	0	0.55	1	0	1	2.75
ZINC18079	Oc1cccc(c1)[C@@H]([C@H]([NH3+])C)O	C9H14NO2+	168.21	12	6	0.33	2	2	3	48.17	68.1	1.6	-0.27	-0.27	-3.04	0.67	-0.26	-0.95	18.8	0.112	Very soluble	-0.7	33.5	0.199	Very soluble	-1.36	7.26	0.0432	Soluble	High	No	No	No	No	No	No	No	-7.52	0	0	0	0	1	0.55	0	0	1	2.03
ZINC20246	COc1ccc2c(c1)N(C[C@@H](C[NH+](C)C)C)c1c(S2)cccc1	C19H25N2OS+	329.48	23	12	0.37	5	1	1	102.63	42.21	3.54	4.68	2.7	0.02	3.57	2.9	-4.89	0.00427	1.3e-05	Moderately soluble	-5.29	0.00167	5.08e-06	Moderately soluble	-5.81	0.000508	1.54e-06	Moderately soluble	High	Yes	No	Yes	No	Yes	Yes	No	-4.99	0	0	0	0	0	0.55	0	0	1	3.82
ZINC20249	C[NH+](CC/C=C\1/c2ccccc2SCc2c1cccc2)C	C19H22NS+	296.45	21	12	0.26	3	0	1	94.17	29.74	3.5	4.49	3.11	0.67	4.78	3.31	-4.73	0.0055	1.86e-05	Moderately soluble	-4.84	0.00433	1.46e-05	Moderately soluble	-6.52	9.01e-05	3.04e-07	Poorly soluble	High	Yes	No	Yes	Yes	No	Yes	No	-4.92	0	0	0	0	0	0.55	0	0	1	3.79
ZINC20252	C[C@H](Cc1ccc(cc1)O)[NH2+]C[C@H](c1cc(O)cc(c1)O)O	C17H22NO4+	304.36	22	12	0.29	6	4	5	86.41	97.53	1.86	1.96	0.71	-2.28	2.15	0.88	-2.97	0.327	0.00107	Soluble	-3.63	0.0708	0.000233	Soluble	-3.95	0.0343	0.000113	Soluble	High	No	Yes	No	No	No	No	No	-6.77	0	0	0	0	0	0.55	0	0	0	2.82
ZINC24947	OC[C@H](C[NH+]1CCN(CC1)c1ccccc1)O	C13H21N2O2+	237.32	17	6	0.54	4	2	3	75.6	48.14	1.83	0.55	-2.02	-3.13	0.79	-0.4	-1.66	5.25	0.0221	Very soluble	-1.13	17.5	0.0736	Very soluble	-1.89	3.03	0.0128	Soluble	Low	No	Yes	No	No	No	No	No	-7.36	0	1	0	0	0	0.55	0	0	1	2.34
ZINC32350	CCn1nc(C(=O)[O-])c(=O)c2c1cc1OCOc1c2	C12H9N2O5-	261.21	19	10	0.25	2	6	0	63.15	93.48	1.65	2.11	-0.49	0.3	1.13	0.94	-3.05	0.235	0.000899	Soluble	-3.7	0.0517	0.000198	Soluble	-2.33	1.22	0.00466	Soluble	High	No	No	Yes	No	No	No	No	-6.4	0	1	0	0	0	0.56	0	0	0	2.49
ZINC32352	CCn1cc(C(=O)[O-])c(=O)c2c1[nH+]c(N1CC[NH2+]CC1)c(c2)F	C15H18FN4O3+	321.33	23	10	0.4	3	4	2	90.26	96.12	1.91	-0.2	-2.62	-2.61	1.28	-0.45	-1.83	4.75	0.0148	Very soluble	-1.36	14	0.0434	Very soluble	-3.33	0.15	0.000466	Soluble	Low	No	No	No	No	No	No	No	-8.4	0	1	0	0	0	0.55	0	0	0	2.66
ZINC33517	COc1c(OC)ccc2c1C[NH+]1CCc3c([C@H]1C2)cc1c(c3)OCO1	C20H22NO4+	340.39	25	12	0.4	2	4	1	98.03	41.36	3.61	3.11	0.81	-1.3	3.52	1.95	-4.13	0.0251	7.36e-05	Moderately soluble	-3.65	0.0767	0.000225	Soluble	-5.38	0.00143	4.2e-06	Moderately soluble	High	Yes	Yes	No	No	No	Yes	Yes	-6.17	0	0	0	0	0	0.55	0	0	0	3.68
ZINC33518	COc1c(OC)ccc2c1C[NH+]1CCc3c([C@@H]1C2)cc1c(c3)OCO1	C20H22NO4+	340.39	25	12	0.4	2	4	1	98.03	41.36	3.62	3.11	0.81	-1.3	3.52	1.95	-4.13	0.0251	7.36e-05	Moderately soluble	-3.65	0.0767	0.000225	Soluble	-5.38	0.00143	4.2e-06	Moderately soluble	High	Yes	Yes	No	No	No	Yes	Yes	-6.17	0	0	0	0	0	0.55	0	0	0	3.68
ZINC39908	Nc1ccn(c(=O)n1)[C@H]1CC[C@@H](O1)CO	C9H13N3O3	211.22	15	6	0.56	2	4	2	53.52	90.37	1.08	-1.3	-0.82	-0.7	-0.47	-0.44	-0.49	67.6	0.32	Very soluble	-0.1	168	0.794	Very soluble	-0.6	52.9	0.251	Soluble	High	No	No	No	No	No	No	No	-8.51	0	1	0	0	0	0.55	0	0	1	3.25
ZINC49141	COc1ccc(nn1)NS(=O)(=O)c1ccc(cc1)N	C11H12N4O3S	280.3	19	12	0.09	4	5	2	70.04	115.58	1.12	0.32	1.77	0.38	-0.24	0.67	-1.98	2.92	0.0104	Very soluble	-2.31	1.37	0.00489	Soluble	-3.91	0.0342	0.000122	Soluble	High	No	No	No	No	No	No	No	-7.78	0	0	0	0	0	0.55	0	1	0	2.82
ZINC54567	COc1ccc(cc1)C1=C(O)c2c(C1=O)cccc2	C16H12O3	252.26	19	12	0.06	2	3	1	73.15	46.53	2.29	2.9	3.32	1.76	3.42	2.74	-3.57	0.0685	0.000271	Soluble	-3.54	0.0731	0.00029	Soluble	-5.16	0.00174	6.9e-06	Moderately soluble	High	Yes	No	Yes	Yes	No	No	Yes	-5.78	0	0	0	0	0	0.85	1	1	0	2.77
ZINC56435	Oc1ccc(cc1Cc1cc(Cl)ccc1O)Cl	C13H10Cl2O2	269.12	17	12	0.08	2	2	2	69.96	40.46	2.28	4.26	4	3.74	4.14	3.68	-4.58	0.00703	2.61e-05	Moderately soluble	-4.82	0.00406	1.51e-05	Moderately soluble	-5.4	0.00107	3.96e-06	Moderately soluble	High	Yes	No	Yes	Yes	Yes	No	No	-4.92	0	0	0	0	0	0.55	0	0	1	1.83
ZINC56545	CNC(=O)Oc1ccc2c(c1)[C@]1(C)CC[NH+]([C@@H]1N2C)C	C15H22N3O2+	276.35	20	6	0.53	3	2	2	85.9	46.01	2.7	1.58	-0.4	-1.64	0.93	0.63	-2.57	0.739	0.00267	Soluble	-2.16	1.93	0.00697	Soluble	-3.22	0.167	0.000604	Soluble	High	No	Yes	No	No	No	No	No	-6.86	0	1	0	0	0	0.55	0	0	0	3.6
ZINC56643	C[NH+]1CCC(CC1)OC(c1ccccc1)c1ccccc1	C19H24NO+	282.4	21	12	0.37	4	1	1	91.48	13.67	3.28	3.86	1.76	-0.44	3.78	2.45	-4.18	0.0186	6.58e-05	Moderately soluble	-3.84	0.0405	0.000143	Soluble	-5.58	0.000741	2.62e-06	Moderately soluble	High	Yes	No	Yes	Yes	No	Yes	No	-5.28	0	0	0	0	0	0.55	0	0	1	2.94
ZINC56651	CC[NH+]([C@@H](CN1c2ccccc2Sc2c1cccc2)C)CC	C19H25N2S+	313.48	22	12	0.37	5	0	1	100.94	32.98	3.47	4.77	3.22	0.63	3.9	3.2	-4.86	0.0043	1.37e-05	Moderately soluble	-5.19	0.00201	6.4e-06	Moderately soluble	-6.1	0.00025	7.98e-07	Poorly soluble	High	Yes	No	Yes	No	Yes	Yes	No	-4.83	0	0	0	0	0	0.55	1	0	1	3.76
ZINC56659	Nc1ccc(cc1)S(=O)(=O)Nc1onc(c1C)C	C11H13N3O3S	267.3	18	11	0.18	3	4	2	67.95	106.6	1.41	1.01	2.57	0.55	0.64	1.24	-2.39	1.09	0.00409	Soluble	-2.84	0.388	0.00145	Soluble	-4.15	0.0189	7.08e-05	Moderately soluble	High	No	No	No	No	No	No	No	-7.21	0	0	0	0	0	0.55	0	1	0	3.02
ZINC57173	OC[C@@H](c1ccccc1)C(=O)OC1C[C@@H]2CC[C@H](C1)[NH+]2C	C17H24NO3+	290.38	21	6	0.59	5	3	2	85.47	50.97	2.79	1.83	0.13	-1.66	2.03	1.02	-2.67	0.614	0.00212	Soluble	-2.52	0.876	0.00302	Soluble	-2.93	0.342	0.00118	Soluble	High	No	No	No	No	No	No	No	-6.77	0	0	0	0	0	0.55	0	0	0	4.49
ZINC57198	C[NH+](CCCN1c2ccccc2Sc2c1cc(cc2)C(=O)C)C	C19H23N2OS+	327.46	23	12	0.32	5	1	1	101.52	50.05	3.42	4.25	2.65	-0.33	3.75	2.75	-4.6	0.00815	2.49e-05	Moderately soluble	-5.01	0.00318	9.72e-06	Moderately soluble	-5.99	0.000334	1.02e-06	Moderately soluble	High	Yes	No	Yes	No	Yes	Yes	No	-5.28	0	0	0	0	0	0.55	0	0	1	3.15
ZINC57204	c1ccc(cc1)CN(c1ccccc1)CC1=[NH+]CCN1	C17H20N3+	266.36	20	12	0.24	5	0	2	92.13	29.24	2.85	2.57	-0.14	2.89	3.5	2.34	-3.22	0.159	0.000596	Soluble	-2.83	0.392	0.00147	Soluble	-5.98	0.000281	1.05e-06	Moderately soluble	High	No	Yes	No	Yes	No	Yes	No	-6.1	0	0	0	0	0	0.55	0	0	0	3
ZINC57236	C[C@H]1CCC[C@@H](N1NC(=O)c1ccc(c(c1)S(=O)(=O)N)Cl)C	C14H20ClN3O3S	345.84	22	6	0.5	4	5	2	88.98	100.88	1.73	2.33	2.6	1.74	0.52	1.78	-3.39	0.141	0.000407	Soluble	-4.09	0.0283	8.17e-05	Moderately soluble	-3.58	0.0908	0.000262	Soluble	High	No	No	No	No	No	No	No	-6.76	0	0	0	0	0	0.55	0	0	0	3.32
ZINC57261	O[C@H](c1cc(Cl)c(c(c1)Cl)N)C[NH2+]C(C)(C)C	C12H19Cl2N2O+	278.2	17	6	0.5	4	1	3	75.13	62.86	2.9	2.2	1.65	-1.09	2.78	1.69	-2.95	0.314	0.00113	Soluble	-3.15	0.195	0.000701	Soluble	-4.41	0.0108	3.9e-05	Moderately soluble	High	Yes	No	No	No	No	No	No	-6.44	0	0	0	0	0	0.55	0	1	0	2.35
ZINC57319	C[C@@H](Cc1ccc(cc1)O)[NH2+]C[C@@H](c1cc(O)cc(c1)O)O	C17H22NO4+	304.36	22	12	0.29	6	4	5	86.41	97.53	2.05	1.96	0.71	-2.28	2.15	0.92	-2.97	0.327	0.00107	Soluble	-3.63	0.0708	0.000233	Soluble	-3.95	0.0343	0.000113	Soluble	High	No	Yes	No	No	No	No	No	-6.77	0	0	0	0	0	0.55	0	0	0	2.82
ZINC57348	C[C@H](Cn1cnc2c1c(=O)n(C)c(=O)n2C)O	C10H14N4O3	238.24	17	9	0.5	2	4	1	62.81	82.05	1.82	-0.77	-1.19	0.04	-0.6	-0.14	-1.09	19.3	0.081	Very soluble	-0.48	79.8	0.335	Very soluble	-0.55	66.8	0.281	Soluble	High	No	No	No	No	No	No	No	-8.3	0	1	0	0	0	0.55	0	0	1	2.8
ZINC57400	COc1ccc2c(c1)N(C[C@H](C[NH+](C)C)C)c1c(S2)cccc1	C19H25N2OS+	329.48	23	12	0.37	5	1	1	102.63	42.21	3.6	4.68	2.7	0.02	3.57	2.91	-4.89	0.00427	1.3e-05	Moderately soluble	-5.29	0.00167	5.08e-06	Moderately soluble	-5.81	0.000508	1.54e-06	Moderately soluble	High	Yes	No	Yes	No	Yes	Yes	No	-4.99	0	0	0	0	0	0.55	0	0	1	3.82
ZINC57407	COc1ccc(c(c1)[C@H]([C@H]([NH3+])C)O)OC	C11H18NO3+	212.27	15	6	0.45	4	3	2	59.13	66.33	1.95	0.51	0.04	-3.02	1.23	0.14	-1.51	6.57	0.0309	Very soluble	-1.47	7.14	0.0336	Very soluble	-2.21	1.31	0.00617	Soluble	High	No	No	No	No	No	No	No	-7.23	0	0	0	0	0	0.55	0	0	1	2.69
ZINC57501	Nc1ccc(cc1)S(=O)(=O)Nc1nccc(n1)C	C11H12N4O2S	264.3	18	12	0.09	3	4	2	68.52	106.35	1.08	0.14	2.07	0.1	0.21	0.72	-1.86	3.63	0.0137	Very soluble	-1.93	3.11	0.0118	Very soluble	-4.18	0.0176	6.65e-05	Moderately soluble	High	No	No	No	No	No	No	No	-7.81	0	0	0	0	0	0.55	0	1	0	2.37
ZINC57520	C[C@@H](C(=O)c1ccc(cc1)C)C[NH+]1CCCCC1	C16H24NO+	246.37	18	6	0.56	4	1	1	80.91	21.51	3.11	3.65	1.5	-0.99	3.82	2.22	-3.65	0.0552	0.000224	Soluble	-3.79	0.0399	0.000162	Soluble	-4.3	0.0122	4.97e-05	Moderately soluble	High	Yes	No	No	No	No	No	No	-5.21	0	0	0	0	0	0.55	0	0	2	2.13
ZINC57623	[NH3+]C[C@H](c1ccc(c(c1)O)O)O	C8H12NO3+	170.19	12	6	0.25	2	3	4	45.39	88.33	0.8	-1.24	-0.95	-3.94	0.02	-1.06	-0.35	75.7	0.445	Very soluble	-0.12	129	0.76	Very soluble	-0.76	29.6	0.174	Soluble	High	No	No	No	No	No	No	No	-8.22	0	1	0	0	1	0.55	1	1	1	1.72
ZINC61044	O=c1cc(n(n1c1ccccc1)C)C	C11H12N2O	188.23	14	11	0.18	1	1	0	56.26	26.93	2.29	0.38	1.48	2.18	1.52	1.57	-1.76	3.26	0.0173	Very soluble	-0.51	58	0.308	Very soluble	-2.79	0.309	0.00164	Soluble	High	Yes	No	Yes	No	No	No	No	-7.18	0	0	0	0	1	0.55	0	0	1	1.88
ZINC74838	O[C@@H]([C@H]([NH2+]C)C)c1ccccc1	C10H16NO+	166.24	12	6	0.4	3	1	2	51.05	36.84	2.22	0.93	-0.02	-2.12	1.56	0.51	-1.63	3.91	0.0235	Very soluble	-1.29	8.53	0.0513	Very soluble	-2.74	0.305	0.00183	Soluble	High	No	No	No	No	No	No	No	-6.65	0	0	0	0	1	0.55	0	0	1	1.79
ZINC83317	[O-]C(=O)[C@@H](Cc1c[nH]c2c1cccc2)[NH3+]	C11H12N2O2	204.23	15	9	0.18	3	2	2	56.67	83.56	0.89	-1.06	-0.93	-3.13	1.53	-0.54	-0.68	42.2	0.207	Very soluble	-0.21	127	0.622	Very soluble	-2.76	0.357	0.00175	Soluble	High	No	No	No	No	No	No	No	-8.3	0	1	0	0	0	0.55	0	0	1	2.09
ZINC113378	OC[C@H]([C@H](c1ccc(cc1)[N+](=O)[O-])O)NC(=O)C(Cl)Cl	C11H12Cl2N2O5	323.13	20	6	0.36	7	5	3	74.38	115.38	0.53	1.14	0.58	0.02	-0.26	0.4	-2.32	1.54	0.00477	Soluble	-3.16	0.225	0.000696	Soluble	-2.39	1.32	0.00409	Soluble	High	No	No	No	No	No	No	No	-7.46	0	0	0	0	0	0.55	0	3	0	2.78
ZINC119480	CC[C@H]1C(=O)OC[C@@H]1Cc1cncn1C	C11H16N2O2	208.26	15	5	0.64	3	3	0	56.47	44.12	1.71	0.12	1.16	0.9	1.63	1.11	-1.26	11.6	0.0555	Very soluble	-0.6	52	0.25	Very soluble	-2.28	1.1	0.00527	Soluble	High	Yes	No	No	No	No	No	No	-7.49	0	0	0	0	0	0.55	0	0	1	3.09
ZINC119486	CC[C@@H]1C(=O)OC[C@H]1Cc1cncn1C	C11H16N2O2	208.26	15	5	0.64	3	3	0	56.47	44.12	1.73	0.12	1.16	0.9	1.63	1.11	-1.26	11.6	0.0555	Very soluble	-0.6	52	0.25	Very soluble	-2.28	1.1	0.00527	Soluble	High	Yes	No	No	No	No	No	No	-7.49	0	0	0	0	0	0.55	0	0	1	3.09
ZINC119492	CC[C@H]1C(=O)OC[C@H]1Cc1cncn1C	C11H16N2O2	208.26	15	5	0.64	3	3	0	56.47	44.12	1.8	0.12	1.16	0.9	1.63	1.12	-1.26	11.6	0.0555	Very soluble	-0.6	52	0.25	Very soluble	-2.28	1.1	0.00527	Soluble	High	Yes	No	No	No	No	No	No	-7.49	0	0	0	0	0	0.55	0	0	1	3.09
ZINC119842	C1CN2C(=N[C@@H](C2)c2ccccc2)S1	C11H12N2S	204.29	14	6	0.36	1	1	0	67.82	40.9	1.98	1.84	1.06	2.18	2.75	1.96	-2.52	0.621	0.00304	Soluble	-2.32	0.979	0.00479	Soluble	-3.03	0.189	0.000927	Soluble	High	Yes	No	No	No	No	No	No	-6.24	0	0	0	0	0	0.55	0	0	1	3.47
ZINC119983	Oc1cc2O[C@H](c3ccc(c(c3)O)O)[C@H](Cc2c(c1)O)O	C15H14O6	290.27	21	12	0.2	1	6	5	74.33	110.38	1.33	0.36	1.22	0.24	0.98	0.83	-2.22	1.74	0.00598	Soluble	-2.24	1.66	0.00572	Soluble	-2.14	2.09	0.00719	Soluble	High	No	Yes	No	No	No	No	No	-7.82	0	0	0	0	0	0.55	1	1	0	3.5
ZINC119985	Oc1cc2O[C@@H](c3ccc(c(c3)O)O)[C@@H](Cc2c(c1)O)O	C15H14O6	290.27	21	12	0.2	1	6	5	74.33	110.38	1.36	0.36	1.22	0.24	0.98	0.83	-2.22	1.74	0.00598	Soluble	-2.24	1.66	0.00572	Soluble	-2.14	2.09	0.00719	Soluble	High	No	Yes	No	No	No	No	No	-7.82	0	0	0	0	0	0.55	1	1	0	3.5
ZINC119988	Oc1cc2O[C@H](c3ccc(c(c3)O)O)[C@@H](Cc2c(c1)O)O	C15H14O6	290.27	21	12	0.2	1	6	5	74.33	110.38	1.47	0.36	1.22	0.24	0.98	0.85	-2.22	1.74	0.00598	Soluble	-2.24	1.66	0.00572	Soluble	-2.14	2.09	0.00719	Soluble	High	No	Yes	No	No	No	No	No	-7.82	0	0	0	0	0	0.55	1	1	0	3.5
ZINC125006	c1ccc(cc1)CC1=[NH+]CCN1	C10H13N2+	161.22	12	6	0.3	2	0	2	58.41	26	1.82	2.65	-1.45	1.89	3	1.58	-2.75	0.289	0.00179	Soluble	-2.85	0.229	0.00142	Soluble	-3.71	0.0318	0.000197	Soluble	Low	No	No	No	No	No	Yes	No	-5.4	0	1	0	0	1	0.55	0	0	1	2.38
ZINC155525	C[NH+]1CCc2c3[C@@H]1Cc1ccc(c(c1c3ccc2)O)O	C17H18NO2+	268.33	20	12	0.29	0	2	3	83.98	44.9	2.56	2.3	0.73	-1.26	2.89	1.44	-3.4	0.108	0.000401	Soluble	-2.88	0.353	0.00132	Soluble	-4.36	0.0117	4.36e-05	Moderately soluble	High	Yes	Yes	Yes	No	No	No	No	-6.3	0	0	0	0	0	0.55	1	1	0	3.56
ZINC155894	CC[C@@H]([C@@H](c1ccccc1)C(=O)OC1CC[NH+](CC1)C)C	C18H28NO2+	290.42	21	6	0.61	6	2	1	91.23	30.74	3.55	4.21	1.66	-0.58	3.53	2.47	-4.11	0.0226	7.79e-05	Moderately soluble	-4.57	0.0079	2.72e-05	Moderately soluble	-4.24	0.0168	5.79e-05	Moderately soluble	High	Yes	No	No	No	No	No	No	-5.08	0	0	0	0	0	0.55	0	0	1	3.63
ZINC155896	CC[C@H]([C@H](c1ccccc1)C(=O)OC1CC[NH+](CC1)C)C	C18H28NO2+	290.42	21	6	0.61	6	2	1	91.23	30.74	3.52	4.21	1.66	-0.58	3.53	2.47	-4.11	0.0226	7.79e-05	Moderately soluble	-4.57	0.0079	2.72e-05	Moderately soluble	-4.24	0.0168	5.79e-05	Moderately soluble	High	Yes	No	No	No	No	No	No	-5.08	0	0	0	0	0	0.55	0	0	1	3.63
ZINC156836	C[NH2+][C@@H](Cc1ccccc1OC)C	C11H18NO+	180.27	13	6	0.45	4	1	1	56.38	25.84	2.58	2.65	0.82	-1.56	2.38	1.37	-2.7	0.356	0.00197	Soluble	-2.84	0.258	0.00143	Soluble	-3.8	0.0284	0.000157	Soluble	High	Yes	No	No	No	No	No	No	-5.52	0	0	0	0	1	0.55	0	0	1	1.91
ZINC188746	O=C(C(c1ccccc1)(c1ccccc1)O)OCC[NH+]1CCCCC1	C21H26NO3+	340.44	25	12	0.38	7	3	2	102.34	50.97	3.62	3.52	1.05	-0.99	3.57	2.15	-4.06	0.0295	8.68e-05	Moderately soluble	-4.27	0.0181	5.32e-05	Moderately soluble	-5.58	0.0009	2.64e-06	Moderately soluble	High	Yes	No	No	No	No	No	No	-5.88	0	0	0	0	0	0.55	0	0	1	2.76
ZINC388085	Oc1ccc(c(c1)C(C)(C)C)O	C10H14O2	166.22	12	6	0.4	1	2	2	49.76	40.46	1.88	2.83	2.4	2.1	2.02	2.24	-2.96	0.183	0.0011	Soluble	-3.34	0.0764	0.00046	Soluble	-2.45	0.591	0.00356	Soluble	High	Yes	No	Yes	No	No	No	No	-5.3	0	0	0	0	1	0.55	0	1	1	1.03
ZINC388131	[O-]C(=O)[C@@](Cc1ccc(cc1)O)([NH3+])C	C10H13NO3	195.22	14	6	0.3	3	3	2	51.68	88	0.67	-1.89	-1.31	-2.86	0.6	-0.96	0.02	205	1.05	Highly soluble	0.56	712	3.65	Highly soluble	-1.68	4.06	0.0208	Soluble	High	No	No	No	No	No	No	No	-8.83	0	1	0	0	1	0.55	0	0	1	1.64
ZINC394206	C[C@H]([NH2+][C@@H]([C@@H](c1ccc(cc1)O)O)C)CCc1ccccc1	C19H26NO2+	300.42	22	12	0.37	7	2	3	91.98	57.07	2.83	3.46	2.07	-0.66	3.71	2.28	-3.82	0.0451	0.00015	Soluble	-4.34	0.0137	4.57e-05	Moderately soluble	-5.54	0.000876	2.92e-06	Moderately soluble	High	Yes	Yes	No	No	No	Yes	No	-5.68	0	0	0	0	0	0.55	0	0	0	2.98
ZINC402777	COc1ccc2c3c1O[C@@H]1[C@@]43CC[NH+]([C@H](C2)[C@@H]4C=C[C@H]1O)C	C18H22NO3+	300.37	22	6	0.56	1	3	2	87.7	43.13	2.88	1.14	-0.3	-1.7	1.86	0.77	-2.56	0.834	0.00278	Soluble	-1.64	6.88	0.0229	Very soluble	-2.76	0.517	0.00172	Soluble	High	No	Yes	No	No	No	No	No	-7.32	0	0	0	0	0	0.55	0	1	0	5.03
ZINC403529	C=C1CC[C@@]2([C@@]34[C@H]1Oc1c4c(C[C@H]2[NH+](CC3)CC2CC2)ccc1O)O	C21H26NO3+	340.44	25	6	0.62	2	3	3	100.39	54.13	3.13	2.33	0.65	-1.02	3.33	1.68	-3.46	0.117	0.000343	Soluble	-3.11	0.267	0.000784	Soluble	-3.96	0.0373	0.00011	Soluble	High	Yes	Yes	No	No	No	No	No	-6.72	0	0	0	0	0	0.55	0	1	0	4.97
ZINC489135	OC[C@@H]1O[C@H](C[C@H]1O)n1cc(F)c(=O)[nH]c1=O	C9H11FN2O5	246.19	17	6	0.56	2	6	3	53.07	104.55	0.8	-1.16	-1.59	-0.62	-0.07	-0.53	-0.76	42.3	0.172	Very soluble	-0.54	70.5	0.286	Very soluble	-0.34	113	0.457	Soluble	High	No	No	No	No	No	No	No	-8.63	0	1	0	0	0	0.55	0	0	1	3.61
ZINC518397	Oc1ccc2c(c1)CC[C@H]1[C@@H]2CC[C@@]2([C@H]1CC[C@@H]2O)C	C18H24O2	272.38	20	6	0.67	0	2	2	81.03	40.46	2.55	4.01	3.61	3.53	3.25	3.39	-4.28	0.0144	5.28e-05	Moderately soluble	-4.56	0.00747	2.74e-05	Moderately soluble	-3.75	0.0485	0.000178	Soluble	High	Yes	Yes	No	No	No	Yes	No	-5.11	0	0	0	0	0	0.55	0	0	1	3.49
ZINC523925	O=C(NS(=O)(=O)c1ccc(cc1)C)NN1C[C@@H]2[C@@H](C1)CCC2	C15H21N3O3S	323.41	22	6	0.53	5	4	2	86.93	86.89	2.43	1.48	2.33	2.01	0.2	1.69	-2.65	0.725	0.00224	Soluble	-2.91	0.396	0.00123	Soluble	-3.55	0.0905	0.00028	Soluble	High	No	Yes	No	No	No	No	No	-7.22	0	0	0	0	0	0.55	0	0	0	3.52
ZINC531272	CC(C[C@@H](C1(CCC1)c1ccc(cc1)Cl)[NH+](C)C)C	C17H27ClN+	280.86	19	6	0.65	5	0	1	86.41	4.44	3.59	5.43	3.32	0.78	4.85	3.59	-4.91	0.00349	1.24e-05	Moderately soluble	-5.28	0.00148	5.26e-06	Moderately soluble	-5.5	0.000898	3.2e-06	Moderately soluble	High	Yes	No	No	No	No	Yes	No	-4.16	0	0	0	0	2	0.55	0	0	1	2.61
ZINC537804	Cc1onc(c1)C(=O)NCCc1ccc(cc1)S(=O)(=O)NC(=O)NN1CCCCCC1	C20H27N5O5S	449.52	31	11	0.45	10	7	3	116.58	142.02	2.55	2.9	2.43	1.28	0.74	1.98	-4.06	0.0395	8.78e-05	Moderately soluble	-5.54	0.00129	2.86e-06	Moderately soluble	-5.81	0.000696	1.55e-06	Moderately soluble	Low	No	Yes	No	No	Yes	No	Yes	-6.98	0	0	1	1	0	0.55	0	0	2	3.63
ZINC537809	COC1=CC(=O)C[C@@H]([C@]21Oc1c(C2=O)c(OC)cc(c1Cl)OC)C	C17H17ClO6	352.77	24	6	0.41	3	6	0	86.59	71.06	2.96	2.18	2.81	0.71	3.39	2.41	-3.39	0.145	0.00041	Soluble	-3.31	0.175	0.000495	Soluble	-4.71	0.00689	1.95e-05	Moderately soluble	High	Yes	No	Yes	No	Yes	No	Yes	-6.9	0	0	0	0	0	0.85	0	0	1	4.59
ZINC537811	Clc1ccc2c(c1)C(=NCC(=O)N2CC(F)(F)F)c1ccccc1	C17H12ClF3N2O	352.74	24	12	0.18	3	5	0	92.95	32.67	2.72	3.97	4.59	3.26	5	3.91	-4.7	0.00704	1.99e-05	Moderately soluble	-4.36	0.0155	4.4e-05	Moderately soluble	-6.87	4.77e-05	1.35e-07	Poorly soluble	High	Yes	No	Yes	Yes	Yes	Yes	No	-5.63	0	0	0	0	0	0.55	0	0	2	3.1
ZINC537877	Fc1ccc(cc1)C(=O)C1CC[NH+](CC1)CCn1c(=O)[nH]c2c(c1=O)cccc2	C22H23FN3O3+	396.43	29	16	0.32	5	4	2	114.27	76.37	2.74	3.29	1.05	-0.62	3.86	2.06	-4.45	0.0141	3.56e-05	Moderately soluble	-4.57	0.0107	2.7e-05	Moderately soluble	-6.29	0.000203	5.12e-07	Poorly soluble	High	No	No	No	No	Yes	No	No	-6.38	0	0	0	0	0	0.55	0	0	1	3.55
ZINC538438	Clc1ccc(cc1)OC(C(=O)OCCn1cnc2c1c(=O)n(C)c(=O)n2C)(C)C	C19H21ClN4O5	420.85	29	15	0.37	7	6	0	108.42	97.35	3.48	2.29	1.49	2.07	1.78	2.22	-3.81	0.0648	0.000154	Soluble	-3.97	0.0449	0.000107	Soluble	-4.38	0.0176	4.19e-05	Moderately soluble	High	No	No	No	Yes	Yes	No	Yes	-7.24	0	0	0	0	0	0.55	0	0	1	3.18
ZINC538450	[O-]C(=O)[C@H]1CCC[NH+](C1)CCC=C(c1sccc1C)c1sccc1C	C20H25NO2S2	375.55	25	10	0.45	6	2	1	110.65	101.05	3.47	2.65	1.91	-0.36	6.41	2.82	-3.74	0.0687	0.000183	Soluble	-4.42	0.0142	3.77e-05	Moderately soluble	-4.94	0.00435	1.16e-05	Moderately soluble	High	No	Yes	No	Yes	Yes	No	No	-6.71	0	0	0	0	0	0.55	0	0	1	4.25
ZINC538538	O=C(c1cc(c(cc1O)Cl)S(=O)(=O)N)Nc1c(C)cccc1C	C15H15ClN2O4S	354.81	23	12	0.13	4	5	3	88.62	117.87	1.6	2.19	3.45	1.87	1.88	2.2	-3.54	0.102	0.000287	Soluble	-4.3	0.0178	5.02e-05	Moderately soluble	-5.25	0.00198	5.57e-06	Moderately soluble	High	No	No	No	No	Yes	No	Yes	-6.91	0	0	0	0	0	0.55	0	0	1	2.37
ZINC538566	CCOC(=O)C1C(=NC(=C([C@@H]1c1cccc(c1Cl)Cl)C(=O)OC)C)C	C18H19Cl2NO4	384.25	25	6	0.39	6	5	0	101.3	64.96	3.53	3.66	3.8	2.99	5.03	3.8	-4.31	0.0188	4.9e-05	Moderately soluble	-4.71	0.00743	1.93e-05	Moderately soluble	-5.83	0.000572	1.49e-06	Moderately soluble	High	Yes	No	Yes	Yes	Yes	No	Yes	-6.05	0	0	0	0	0	0.55	0	1	2	4.43
ZINC538569	CCOC(=O)C1C(=NC(=C([C@@H]1c1cccc(c1)[N+](=O)[O-])C(=O)OC)C)C	C18H20N2O6	360.36	26	6	0.39	7	7	0	100.1	110.78	2.82	2.23	2.4	1.07	1.6	2.02	-3.19	0.234	0.000649	Soluble	-4.19	0.0232	6.43e-05	Moderately soluble	-3.99	0.0366	0.000102	Soluble	High	No	No	No	Yes	Yes	No	No	-6.91	0	0	0	0	0	0.55	0	3	1	4.47
ZINC538578	CCOC(=O)C1C(=NC(=C([C@H]1c1cccc(c1Cl)Cl)C(=O)OC)C)C	C18H19Cl2NO4	384.25	25	6	0.39	6	5	0	101.3	64.96	3.59	3.66	3.8	2.99	5.03	3.81	-4.31	0.0188	4.9e-05	Moderately soluble	-4.71	0.00743	1.93e-05	Moderately soluble	-5.83	0.000572	1.49e-06	Moderately soluble	High	Yes	No	Yes	Yes	Yes	No	Yes	-6.05	0	0	0	0	0	0.55	0	1	2	4.43
ZINC538580	CCOC(=O)C1C(=NC(=C([C@H]1c1cccc(c1)[N+](=O)[O-])C(=O)OC)C)C	C18H20N2O6	360.36	26	6	0.39	7	7	0	100.1	110.78	2.76	2.23	2.4	1.07	1.6	2.01	-3.19	0.234	0.000649	Soluble	-4.19	0.0232	6.43e-05	Moderately soluble	-3.99	0.0366	0.000102	Soluble	High	No	No	No	Yes	Yes	No	No	-6.91	0	0	0	0	0	0.55	0	3	1	4.47
ZINC598034	COc1cc2nc(nc(c2cc1OC)N)N1CCN(CC1)C(=O)[C@@H]1CCCO1	C19H25N5O4	387.43	28	10	0.53	5	6	1	111.59	103.04	2.89	1.26	0.3	0.29	0.94	1.13	-2.97	0.415	0.00107	Soluble	-3.02	0.368	0.000949	Soluble	-3.51	0.121	0.000311	Soluble	High	No	Yes	Yes	No	No	Yes	No	-7.77	0	0	0	0	0	0.55	0	0	1	3.53
ZINC601259	COc1ccc(cc1)[C@H]1Sc2ccccc2N(C(=O)[C@H]1OC(=O)C)CC[NH+](C)C	C22H27N2O4S+	415.53	29	12	0.36	7	4	1	118.65	85.58	3.41	2.7	1.25	-1.28	2.83	1.78	-3.96	0.0454	0.000109	Soluble	-4.15	0.0294	7.08e-05	Moderately soluble	-5.65	0.000924	2.22e-06	Moderately soluble	High	No	No	No	No	No	No	No	-6.92	0	0	0	0	0	0.55	0	0	1	4.4
ZINC601272	COc1ccc2c(c1)c(CC(=O)OCC(=O)[O-])c(n2C(=O)c1ccc(cc1)Cl)C	C21H17ClNO6-	414.82	29	15	0.19	8	6	0	105.08	97.66	2.84	4.19	2.14	2.86	3.8	3.17	-4.91	0.00515	1.24e-05	Moderately soluble	-5.95	0.000465	1.12e-06	Moderately soluble	-5.83	0.000607	1.46e-06	Moderately soluble	High	No	No	Yes	Yes	Yes	No	No	-5.86	0	0	0	0	0	0.56	0	0	3	2.85
ZINC601274	COc1ccc(cc1)CC[NH+]1CCC(CC1)Nc1nc2c(n1Cc1ccc(cc1)F)cccc2	C28H32FN4O+	459.58	34	21	0.32	8	3	2	140.23	43.52	4.44	5.97	3.78	0.77	4.95	3.98	-6.38	0.000192	4.17e-07	Poorly soluble	-6.66	0.000101	2.19e-07	Poorly soluble	-9.15	3.23e-07	7.03e-10	Poorly soluble	High	Yes	Yes	Yes	Yes	No	No	No	-4.86	0	1	0	0	1	0.55	0	0	3	4.07
ZINC601310	O=C1N(c2ccccc2)N(C(=O)C1CC[S@](=O)c1ccccc1)c1ccccc1	C23H20N2O3S	404.48	29	18	0.13	6	3	0	120.08	76.9	3.4	2.3	3.9	3.54	2.33	3.09	-3.86	0.0558	0.000138	Soluble	-3.55	0.113	0.00028	Soluble	-7.23	2.4e-05	5.94e-08	Poorly soluble	High	Yes	No	No	Yes	Yes	Yes	Yes	-7.13	0	0	0	0	0	0.55	1	1	1	3.81
ZINC601312	Clc1cc2N[C@@H](CC3CCCC3)NS(=O)(=O)c2cc1S(=O)(=O)N	C13H18ClN3O4S2	379.88	23	6	0.54	3	6	3	94.3	135.12	1.1	1.27	2.81	0.87	0.22	1.25	-2.99	0.388	0.00102	Soluble	-3.71	0.0747	0.000197	Soluble	-4.15	0.0268	7.06e-05	Moderately soluble	High	No	Yes	No	No	No	No	No	-7.72	0	0	0	1	0	0.55	0	0	1	3.81
ZINC607750	CC(C[C@@H]1Nc2cc(Cl)c(cc2S(=O)(=O)N1)S(=O)(=O)N)C	C11H16ClN3O4S2	353.85	21	6	0.45	3	6	3	86.8	135.12	1.18	1.09	2.27	0.33	-0.12	0.95	-2.73	0.653	0.00185	Soluble	-3.52	0.107	0.000302	Soluble	-3.84	0.0516	0.000146	Soluble	High	No	No	No	No	No	No	No	-7.68	0	0	0	1	0	0.55	0	0	1	3.68
ZINC608106	CC[C@H]1C(=NN=C(c2c1cc(OC)c(c2)OC)c1ccc(c(c1)OC)OC)C	C22H26N2O4	382.45	28	12	0.36	6	6	0	117.97	61.64	3.82	4	3.68	2.26	5.69	3.89	-4.65	0.00852	2.23e-05	Moderately soluble	-5	0.00386	1.01e-05	Moderately soluble	-7.21	2.37e-05	6.21e-08	Poorly soluble	High	Yes	No	No	Yes	Yes	Yes	Yes	-5.79	0	0	0	0	0	0.55	0	0	2	4.64
ZINC608172	CC[NH+](Cc1cc(ccc1O)Nc1ccnc2c1ccc(c2)Cl)CC	C20H23ClN3O+	356.87	25	16	0.25	6	2	3	106.67	49.59	3.69	5.18	3.61	-0.58	4.12	3.2	-5.39	0.00144	4.04e-06	Moderately soluble	-5.97	0.000384	1.08e-06	Moderately soluble	-7.59	9.13e-06	2.56e-08	Poorly soluble	High	Yes	No	Yes	No	No	Yes	No	-4.8	0	0	0	0	1	0.55	1	1	2	2.63
ZINC608191	OCC[NH+](CCn1c(Cc2ccccc2)nc2c1c(=O)n(C)c(=O)n2C)CC	C20H28N5O3+	386.47	28	15	0.45	8	4	2	110.84	86.49	3.46	1.18	-1.08	-2.11	1.51	0.59	-2.85	0.549	0.00142	Soluble	-2.59	0.989	0.00256	Soluble	-4.31	0.019	4.92e-05	Moderately soluble	High	No	Yes	No	No	No	No	No	-7.82	0	1	0	0	0	0.55	0	0	2	3.87
ZINC608205	CCc1oc2c(c1C(=O)c1cc(Br)c(c(c1)Br)O)cccc2	C17H12Br2O3	424.08	22	15	0.12	3	3	1	93.28	50.44	3.31	5.66	5.46	3.43	5.55	4.68	-6.34	0.000193	4.55e-07	Poorly soluble	-6.48	0.000139	3.28e-07	Poorly soluble	-7.57	1.13e-05	2.67e-08	Poorly soluble	High	Yes	No	Yes	Yes	Yes	No	No	-4.87	0	0	0	0	1	0.55	0	0	2	3.14
ZINC608220	Brc1cc(Br)c(c(c1)C[NH+](C1CCCCC1)C)N	C14H21Br2N2+	377.14	18	6	0.57	3	0	2	86.9	30.46	3.48	4.27	3	0.15	3.69	2.92	-4.92	0.00457	1.21e-05	Moderately soluble	-4.62	0.00901	2.39e-05	Moderately soluble	-5.25	0.00213	5.64e-06	Moderately soluble	High	Yes	No	Yes	No	No	Yes	No	-5.57	0	0	0	0	0	0.55	0	1	2	2.5
ZINC608288	CC(=O)Oc1ccc(cc1)C(=C1CCCCC1)c1ccc(cc1)OC(=O)C	C23H24O4	364.43	27	12	0.3	6	4	0	105.94	52.6	4	5.5	5.3	4.32	5.31	4.89	-5.5	0.00116	3.18e-06	Moderately soluble	-6.36	0.000158	4.33e-07	Poorly soluble	-6.71	7.04e-05	1.93e-07	Poorly soluble	High	Yes	No	No	Yes	Yes	No	No	-4.62	1	0	0	0	1	0.55	0	1	2	2.94
ZINC621892	COc1ccc(cc1)[C@@H]1Sc2ccccc2N(C(=O)[C@H]1OC(=O)C)CC[NH+](C)C	C22H27N2O4S+	415.53	29	12	0.36	7	4	1	118.65	85.58	3.78	2.7	1.25	-1.28	2.83	1.85	-3.96	0.0454	0.000109	Soluble	-4.15	0.0294	7.08e-05	Moderately soluble	-5.65	0.000924	2.22e-06	Moderately soluble	High	No	No	No	No	Yes	No	No	-6.92	0	0	0	0	0	0.55	0	0	1	4.4
ZINC895030	[O-]C(=O)CCC(=O)[O-]	C4H4O4--	116.07	8	0	0.5	3	4	0	21	80.26	0.34	-0.59	-2.73	-0.54	-0.63	-0.83	0.01	119	1.02	Highly soluble	-0.62	27.6	0.237	Very soluble	0.61	477	4.11	Soluble	Low	No	No	No	No	No	No	No	-7.43	0	4	0	0	2	0.56	0	0	1	1.23
ZINC895124	[O-]C(=O)CC[C@H](C(=O)[O-])[NH3+]	C5H8NO4-	146.12	10	0	0.6	4	4	1	29.77	107.9	0	-3.69	-4.12	-4.64	-1.19	-2.73	1.84	10200	69.6	Highly soluble	2.01	15000	103	Highly soluble	0.89	1140	7.83	Soluble	Low	No	No	No	No	No	No	No	-9.81	0	4	0	0	2	0.56	0	0	1	1.78
ZINC895218	[O-]C(=O)C[C@H](C(=O)[O-])[NH3+]	C4H6NO4-	132.09	9	0	0.5	3	4	1	24.97	107.9	-0.13	-3.89	-4.51	-5.05	-1.49	-3.02	1.99	12900	97.7	Highly soluble	2.22	21900	166	Highly soluble	1.31	2710	20.5	Soluble	Low	No	No	No	No	No	No	No	-9.87	0	4	0	0	3	0.56	0	0	1	1.77
ZINC895297	O[C@H]([C@@H](C(=O)[O-])O)C(=O)[O-]	C4H4O6--	148.07	10	0	0.5	3	6	2	23.32	120.72	0.34	-1.88	-4.79	-2.18	-1.88	-2.08	0.62	623	4.21	Highly soluble	-0.14	108	0.732	Very soluble	2.44	41200	278	Soluble	Low	No	No	No	No	No	No	No	-8.54	0	4	0	0	2	0.56	0	0	1	2.51
ZINC895301	O[C@H]([C@H](C(=O)[O-])O)C(=O)[O-]	C4H4O6--	148.07	10	0	0.5	3	6	2	23.32	120.72	-0.41	-1.88	-4.79	-2.18	-1.88	-2.23	0.62	623	4.21	Highly soluble	-0.14	108	0.732	Very soluble	2.44	41200	278	Soluble	Low	No	No	No	No	No	No	No	-8.54	0	4	0	0	2	0.56	0	0	1	2.51
ZINC895347	[O-]C(=O)[C@H]([NH3+])CS	C3H7NO2S	121.16	7	0	0.67	2	2	1	28.26	106.57	0.4	-2.49	-2.72	-4.53	-0.69	-2.01	1.11	1560	12.9	Highly soluble	0.79	755	6.23	Highly soluble	0.59	470	3.88	Soluble	Low	No	No	No	No	No	No	No	-8.81	0	4	0	0	3	0.55	0	1	1	1.75
ZINC896168	OC[C@@H]1O[C@H](O)[C@H]([C@H]([C@@H]1O)O)O	C6H12O6	180.16	12	0	1	1	6	5	35.74	110.38	0.24	-3.24	-3.22	-2.75	-2.3	-2.26	1.15	2550	14.1	Highly soluble	1.49	5610	31.1	Highly soluble	2.62	74200	412	Soluble	Low	No	Yes	No	No	No	No	No	-9.7	0	2	0	0	2	0.55	0	0	1	4.08
ZINC896169	OC[C@@H]1O[C@@H](O)[C@H]([C@H]([C@@H]1O)O)O	C6H12O6	180.16	12	0	1	1	6	5	35.74	110.38	-2.05	-3.24	-3.22	-2.75	-2.3	-2.71	1.15	2550	14.1	Highly soluble	1.49	5610	31.1	Highly soluble	2.62	74200	412	Soluble	Low	No	Yes	No	No	No	No	No	-9.7	0	2	0	0	2	0.55	0	0	1	4.08
ZINC896449	CCN(C(=O)[C@@H]1C[NH+]2CCc3c([C@@H]2C[C@@H]1OC(=O)C)cc(c(c3)OC)OC)CC	C22H33N2O5+	405.51	29	6	0.64	8	5	1	114.97	69.51	3.65	2.06	0.3	-2.11	2.35	1.25	-3.28	0.214	0.000528	Soluble	-3.15	0.288	0.00071	Soluble	-4.1	0.0322	7.94e-05	Moderately soluble	High	No	No	No	No	No	No	No	-7.31	0	0	0	0	0	0.55	0	0	2	4.42
ZINC896472	Clc1ccc(cc1)[C@@](c1ccccc1)(OCC[C@@H]1CCC[NH+]1C)C	C21H27ClNO+	344.9	24	12	0.43	6	1	1	105.99	13.67	3.98	5.03	3.2	0.49	5.15	3.57	-5.12	0.00261	7.56e-06	Moderately soluble	-5.06	0.00302	8.75e-06	Moderately soluble	-7.08	2.86e-05	8.28e-08	Poorly soluble	High	Yes	No	No	Yes	No	No	No	-4.83	0	0	0	0	1	0.55	0	0	1	3.64
ZINC896583	COC(=O)C1C(=NC(=C([C@@H]1c1cccc2c1non2)C(=O)OC(C)C)C)C	C19H21N3O5	371.39	27	9	0.42	6	8	0	101.45	103.88	3.52	2.09	2.41	1.83	3.28	2.63	-3.31	0.182	0.00049	Soluble	-3.9	0.0466	0.000125	Soluble	-4.78	0.00615	1.66e-05	Moderately soluble	High	No	No	No	Yes	No	No	Yes	-7.08	0	0	0	0	0	0.55	0	1	1	4.62
ZINC896681	C[NH+](C[C@@H](CN1c2ccccc2Sc2c1cccc2)C)C	C18H23N2S+	299.45	21	12	0.33	4	0	1	96.13	32.98	3.46	4.71	2.69	0.4	3.52	2.95	-4.82	0.0045	1.5e-05	Moderately soluble	-5.13	0.00221	7.39e-06	Moderately soluble	-5.7	0.000597	2e-06	Moderately soluble	High	Yes	No	Yes	No	Yes	Yes	No	-4.78	0	0	0	0	0	0.55	1	0	1	3.7
ZINC896683	C[NH+]1CC[C@H](C1)CN1c2ccccc2Sc2c1cccc2	C18H21N2S+	297.44	21	12	0.33	2	0	1	97.64	32.98	3.28	5.23	2.06	0.4	3.37	2.87	-5.27	0.0016	5.37e-06	Moderately soluble	-5.67	0.000635	2.13e-06	Moderately soluble	-5.35	0.00132	4.45e-06	Moderately soluble	High	Yes	Yes	Yes	Yes	Yes	Yes	No	-4.4	0	0	0	0	1	0.55	1	0	1	3.81
ZINC896747	CCc1c(C)[nH]c2c1C(=O)[C@@H](CC2)C[NH+]1CCOCC1	C16H25N2O2+	277.38	20	5	0.69	3	2	2	84.16	46.53	2.86	1.74	0.16	-2.68	3.77	1.17	-2.64	0.631	0.00228	Soluble	-2.33	1.29	0.00464	Soluble	-4.14	0.02	7.19e-05	Moderately soluble	High	No	Yes	Yes	No	No	No	No	-6.76	0	0	0	0	0	0.55	0	0	0	3.25
ZINC896773	COC(=O)C1C(=NC(=C([C@@H]1c1cccc(c1)[N+](=O)[O-])C(=O)OCC[NH+](Cc1ccccc1)C)C)C	C26H30N3O6+	480.53	35	12	0.35	11	7	1	138.35	115.22	3.89	3.4	1.94	-0.04	2.71	2.38	-4.49	0.0156	3.24e-05	Moderately soluble	-5.5	0.00152	3.17e-06	Moderately soluble	-6.55	0.000136	2.84e-07	Poorly soluble	High	No	No	No	No	Yes	No	Yes	-6.82	0	2	1	0	0	0.55	0	3	2	5.26
ZINC896836	OCc1cc2CC[C@H](Nc2cc1[N+](=O)[O-])C[NH2+]C(C)C	C14H22N3O3+	280.34	20	6	0.57	5	3	3	84.58	94.69	2.43	2.24	0.06	-1.2	0.26	0.76	-2.88	0.368	0.00131	Soluble	-3.86	0.0383	0.000137	Soluble	-3.54	0.0816	0.000291	Soluble	High	No	Yes	Yes	No	No	No	No	-6.42	0	0	0	0	0	0.55	0	2	0	3.29
ZINC896838	CC[C@@H]1NC(=O)c2c(N1)cc(c(c2)S(=O)(=O)N)Cl	C10H12ClN3O3S	289.74	18	6	0.3	2	4	3	74.29	109.67	0.49	1.21	1.01	0.53	0.3	0.71	-2.51	0.889	0.00307	Soluble	-3.11	0.225	0.000776	Soluble	-3.68	0.0608	0.00021	Soluble	High	No	No	No	No	No	No	No	-7.21	0	0	0	0	0	0.55	0	0	0	2.82
ZINC896849	CCC(=O)c1ccc2c(c1)N(C[C@H]([NH+](C)C)C)c1c(S2)cccc1	C20H25N2OS+	341.49	24	12	0.35	5	1	1	106.33	50.05	3.59	4.79	3.03	-0.1	3.97	3.06	-5.01	0.0033	9.66e-06	Moderately soluble	-5.57	0.000913	2.67e-06	Moderately soluble	-6.01	0.000331	9.71e-07	Poorly soluble	High	Yes	No	Yes	No	Yes	No	No	-4.98	0	0	0	0	0	0.55	0	0	1	3.69
ZINC896870	C[C@@H]1[NH2+]CCO[C@H]1c1ccccc1	C11H16NO+	178.25	13	6	0.45	1	1	1	57.29	25.84	2.17	1.38	0	-2.22	2.2	0.71	-2.09	1.45	0.00813	Soluble	-1.53	5.31	0.0298	Very soluble	-3.22	0.107	0.0006	Soluble	High	No	No	Yes	No	No	No	No	-6.41	0	0	0	0	1	0.55	0	0	1	2.45
ZINC896873	C[C@H]1[NH2+]CCO[C@H]1c1ccccc1	C11H16NO+	178.25	13	6	0.45	1	1	1	57.29	25.84	2.33	1.38	0	-2.22	2.2	0.74	-2.09	1.45	0.00813	Soluble	-1.53	5.31	0.0298	Very soluble	-3.22	0.107	0.0006	Soluble	High	No	No	Yes	No	No	No	No	-6.41	0	0	0	0	1	0.55	0	0	1	2.45
ZINC896887	CN1C(=O)C[C@H](C1=O)c1ccccc1	C11H11NO2	189.21	14	6	0.27	1	2	0	55.73	37.38	1.76	0.84	0.78	1.22	1.72	1.26	-1.79	3.04	0.0161	Very soluble	-1.21	11.7	0.062	Very soluble	-2.78	0.315	0.00166	Soluble	High	Yes	No	No	No	No	No	No	-6.86	0	0	0	0	1	0.55	0	1	1	1.83
ZINC896998	CCC[NH+]([C@@H](C(=O)Nc1c(C)cccc1C)CC)CC	C17H29N2O+	277.42	20	6	0.59	8	1	2	88.49	33.54	3.56	3.69	2.14	-0.56	3.69	2.5	-3.58	0.0732	0.000264	Soluble	-4.08	0.0228	8.23e-05	Moderately soluble	-5.34	0.00128	4.61e-06	Moderately soluble	High	Yes	Yes	Yes	No	No	Yes	No	-5.37	0	0	0	0	0	0.55	0	0	2	2.92
ZINC897007	O[C@@H](C[NH2+]C(C)C)COc1ccc(cc1)O	C12H20NO3+	226.29	16	6	0.5	6	3	3	64.21	66.3	2.38	1.36	0.1	-2.74	1.4	0.5	-1.98	2.36	0.0104	Very soluble	-2.35	1	0.00442	Soluble	-2.73	0.423	0.00187	Soluble	High	No	No	No	No	No	No	No	-6.71	0	0	0	0	0	0.55	0	0	1	2.33
ZINC897234	ClC([C@H]1Nc2cc(Cl)c(cc2S(=O)(=O)N1)S(=O)(=O)N)Cl	C8H8Cl3N3O4S2	380.66	20	6	0.25	2	6	3	81.98	135.12	-0.05	0.56	2.03	0.05	-0.03	0.51	-2.64	0.866	0.00228	Soluble	-2.97	0.408	0.00107	Soluble	-3.87	0.0515	0.000135	Soluble	High	No	No	No	No	No	No	No	-8.22	0	0	0	1	0	0.55	0	1	1	3.57
ZINC897236	ClC([C@@H]1Nc2cc(Cl)c(cc2S(=O)(=O)N1)S(=O)(=O)N)Cl	C8H8Cl3N3O4S2	380.66	20	6	0.25	2	6	3	81.98	135.12	0.16	0.56	2.03	0.05	-0.03	0.55	-2.64	0.866	0.00228	Soluble	-2.97	0.408	0.00107	Soluble	-3.87	0.0515	0.000135	Soluble	High	No	No	No	No	No	No	No	-8.22	0	0	0	1	0	0.55	0	1	1	3.57
ZINC897245	[O-]C(=O)[C@H]1N2C(=O)C[C@@H]2S(=O)(=O)[C@]1(C)Cn1ccnn1	C10H11N4O5S-	299.28	20	5	0.6	3	7	0	66.55	133.67	-0.02	-1.98	-2.16	-0.44	-2	-1.32	-0.44	110	0.367	Very soluble	-0.3	149	0.497	Very soluble	-0.25	168	0.56	Soluble	Low	No	No	No	No	No	No	No	-9.53	0	1	0	1	0	0.56	0	0	0	4.2
ZINC897253	[O-]C(=O)Cc1ccc2c(c1)/C(=C/CC[NH+](C)C)/c1ccccc1CO2	C21H23NO3	337.41	25	12	0.29	5	3	1	98.54	53.8	3.09	1.47	0.69	-0.8	4.05	1.7	-2.88	0.441	0.00131	Soluble	-2.21	2.1	0.00622	Soluble	-5.9	0.000422	1.25e-06	Moderately soluble	High	Yes	No	No	No	No	No	No	-7.31	0	0	0	0	0	0.55	0	0	0	3.86
ZINC897263	C[N+]1(C)CCN(CC1)C[C@](c1ccccc1)(C1CCCCC1)O	C20H33N2O+	317.49	23	6	0.7	4	2	1	105.39	23.47	0.15	3.13	1.98	-0.84	0.46	0.97	-3.71	0.062	0.000195	Soluble	-3.29	0.162	0.00051	Soluble	-4.97	0.00343	1.08e-05	Moderately soluble	High	Yes	Yes	No	No	No	No	Yes	-6.01	0	0	0	0	0	0.55	0	1	0	3
ZINC897283	CC[C@](C#C)(/C=C/Cl)O	C7H9ClO	144.6	9	0	0.43	2	1	1	39.45	20.23	1.99	1.5	1.59	1.97	1.64	1.74	-1.55	4.08	0.0282	Very soluble	-1.53	4.24	0.0293	Very soluble	-0.91	17.7	0.123	Soluble	High	Yes	No	No	No	No	No	No	-6.12	0	3	0	0	2	0.55	0	1	1	3.11
ZINC967474	[O-]C(=O)[C@H]1CSC[NH2+]1	C4H7NO2S	133.17	8	0	0.75	1	2	1	34.33	82.04	0.65	-2.33	-3.01	-4.47	0.32	-1.77	0.87	983	7.38	Highly soluble	1.14	1850	13.9	Highly soluble	0.02	139	1.04	Soluble	Low	No	No	No	No	No	No	No	-8.77	0	4	0	0	3	0.55	0	0	1	2.93
ZINC967515	C[C@H]1CC[C@@H]([C@@H](C1)O)C(C)C	C10H20O	156.27	11	0	1	1	1	1	49.23	20.23	2.53	3.4	2.44	2.45	2.06	2.58	-2.88	0.204	0.0013	Soluble	-3.5	0.0489	0.000313	Soluble	-1.48	5.22	0.0334	Soluble	High	Yes	No	No	No	No	No	No	-4.84	0	1	0	0	2	0.55	0	0	1	2.63
ZINC967933	CC[N+](CC[C@](c1ccccc1)(C1CCCCC1)O)(CC)CC	C21H36NO+	318.52	23	6	0.71	8	1	1	100.01	20.23	0.26	4.76	4.61	0.26	2.07	2.39	-4.48	0.0106	3.32e-05	Moderately soluble	-4.92	0.00387	1.21e-05	Moderately soluble	-6.53	9.44e-05	2.96e-07	Poorly soluble	High	Yes	No	No	No	No	Yes	Yes	-4.86	0	0	0	0	0	0.55	0	1	2	2.96
ZINC968262	C[C@H]1C[C@H](OC(=O)[C@@H](c2ccccc2)O)CC(C1)(C)C	C17H24O3	276.37	20	6	0.59	4	3	1	79.55	46.53	2.82	4.24	3.15	2.87	3.25	3.27	-4.18	0.0181	6.57e-05	Moderately soluble	-4.93	0.00326	1.18e-05	Moderately soluble	-3.92	0.0336	0.000122	Soluble	High	Yes	No	No	No	No	Yes	No	-4.98	0	0	0	0	0	0.55	0	0	1	3.5
ZINC968276	O=C1NC(=O)[C@@H](S1)Cc1ccc(cc1)OC[C@@]1(C)CCc2c(O1)c(C)c(c(c2C)O)C	C24H27NO5S	441.54	31	12	0.42	5	5	2	125.55	110.16	3.14	5.08	3.99	2.83	5.46	4.1	-5.73	0.000814	1.84e-06	Moderately soluble	-7.14	3.23e-05	7.31e-08	Poorly soluble	-7.42	1.67e-05	3.79e-08	Poorly soluble	High	No	Yes	No	Yes	Yes	No	Yes	-5.39	0	0	0	0	1	0.55	0	1	2	4.43
ZINC968277	O=C1NC(=O)[C@@H](S1)Cc1ccc(cc1)OC[C@]1(C)CCc2c(O1)c(C)c(c(c2C)O)C	C24H27NO5S	441.54	31	12	0.42	5	5	2	125.55	110.16	3.22	5.08	3.99	2.83	5.46	4.12	-5.73	0.000814	1.84e-06	Moderately soluble	-7.14	3.23e-05	7.31e-08	Poorly soluble	-7.42	1.67e-05	3.79e-08	Poorly soluble	High	No	Yes	No	Yes	Yes	No	Yes	-5.39	0	0	0	0	1	0.55	0	1	2	4.43
ZINC968306	C[NH+]([C@@H](Cc1ccccc1)C)Cc1ccccc1	C17H22N+	240.36	18	12	0.29	5	0	1	79.28	4.44	3.24	4.28	2.18	0.41	3.93	2.81	-4.19	0.0155	6.46e-05	Moderately soluble	-4.09	0.0197	8.21e-05	Moderately soluble	-5.89	0.00031	1.29e-06	Moderately soluble	High	Yes	Yes	No	No	No	Yes	No	-4.73	0	0	0	0	1	0.55	0	0	2	2.2
ZINC968311	C1CCC(CC1)(c1ccccc1)[NH+]1CCCCC1	C17H26N+	244.4	18	6	0.65	2	0	1	82.91	4.44	3.33	4.69	2.43	0.27	4.22	2.99	-4.42	0.00919	3.76e-05	Moderately soluble	-4.51	0.00753	3.08e-05	Moderately soluble	-4.78	0.00403	1.65e-05	Moderately soluble	High	Yes	Yes	No	No	No	Yes	No	-4.46	0	0	0	0	1	0.55	0	0	2	1.8
ZINC968335	Cc1ccc(c(c1)[C@H](c1ccccc1)CC[NH+](C(C)C)C(C)C)O	C22H32NO+	326.5	24	12	0.45	7	1	2	105.49	24.67	3.78	5.64	3.92	0.88	5.2	3.89	-5.33	0.00154	4.73e-06	Moderately soluble	-5.92	0.000391	1.2e-06	Moderately soluble	-6.54	9.35e-05	2.86e-07	Poorly soluble	High	Yes	Yes	Yes	No	No	No	No	-4.29	0	0	0	0	1	0.55	0	0	1	3
ZINC968338	C[NH+]1CCC2=C(C1)[C@@H](c1ccccc1)c1c2cccc1	C19H20N+	262.37	20	12	0.26	1	0	1	88.76	4.44	3.25	3.14	2.12	0.4	4.17	2.62	-3.82	0.0394	0.00015	Soluble	-2.9	0.328	0.00125	Soluble	-6.04	0.000239	9.12e-07	Poorly soluble	High	Yes	Yes	Yes	Yes	No	Yes	No	-5.67	0	0	0	0	1	0.55	0	0	0	4.11
ZINC968360	C[NH+]1[C@@H]2CC[C@H]1CC(C2)OC(c1ccccc1)c1ccccc1	C21H26NO+	308.44	23	12	0.43	4	1	1	98.98	13.67	3.53	4.48	2.3	0.01	3.84	2.83	-4.7	0.0062	2.01e-05	Moderately soluble	-4.49	0.01	3.26e-05	Moderately soluble	-5.66	0.000676	2.19e-06	Moderately soluble	High	Yes	Yes	No	No	No	No	No	-5	0	0	0	0	0	0.55	0	0	1	4.36
ZINC1041177	C#C[C@]1(O)CC[C@@H]2[C@@]1(C)CC[C@@H]1[C@H]2CCc2c1ccc(c2)OC	C21H26O2	310.43	23	6	0.62	1	2	1	93.31	29.46	3.34	4	4	4.13	4.47	3.99	-4.41	0.012	3.88e-05	Moderately soluble	-4.32	0.0148	4.78e-05	Moderately soluble	-4.74	0.00567	1.83e-05	Moderately soluble	High	Yes	Yes	No	No	Yes	Yes	No	-5.35	0	0	0	0	0	0.55	0	1	1	4.11
ZINC1078622	OC[C@@H]1O[C@H]([C@@H]([C@@H]1O)O)n1cnc(nc1=O)N	C8H12N4O5	244.2	17	6	0.62	2	7	4	53.64	143.72	0.25	-2.17	-3.48	-2.98	-2.72	-2.22	-0.12	187	0.765	Very soluble	-0.32	118	0.481	Very soluble	1.38	5900	24.2	Soluble	Low	No	No	No	No	No	No	No	-9.33	0	1	1	1	1	0.55	0	0	1	3.77
ZINC1238584	C[C@](C#C)(CC)O	C6H10O	98.14	7	0	0.67	1	1	1	30.32	20.23	1.93	0.77	0.86	1.39	0.78	1.14	-0.87	13.3	0.136	Very soluble	-0.78	16.5	0.168	Very soluble	-0.53	28.8	0.293	Soluble	High	Yes	No	No	No	No	No	No	-6.35	0	3	0	0	2	0.55	0	1	1	3.01
ZINC1271086	C[C@@H]1[NH2+][C@@H](C)CN(C1)c1c(F)c(N)c2c(c1F)n(cc(c2=O)C(=O)[O-])C1CC1	C19H22F2N4O3	392.4	28	10	0.47	3	5	2	108.24	108	2.68	0.11	-0.26	-2.36	1.79	0.39	-2.41	1.53	0.0039	Soluble	-1.93	4.57	0.0117	Very soluble	-3.69	0.0792	0.000202	Soluble	High	No	Yes	No	No	No	No	No	-8.62	0	0	0	0	0	0.55	0	1	1	3.73
ZINC1271441	COc1cc2nc(nc(c2cc1OC)N)N1CCN(CC1)C(=O)[C@H]1CCCO1	C19H25N5O4	387.43	28	10	0.53	5	6	1	111.59	103.04	2.9	1.26	0.3	0.29	0.94	1.14	-2.97	0.415	0.00107	Soluble	-3.02	0.368	0.000949	Soluble	-3.51	0.121	0.000311	Soluble	High	No	Yes	Yes	No	No	Yes	No	-7.77	0	0	0	0	0	0.55	0	0	1	3.53
ZINC1280092	Oc1ccc2c(c1)[C@@]13CCCC[C@@H]3[C@H](C2)[NH+](CC1)C	C17H24NO+	258.38	19	6	0.65	0	1	2	82.97	24.67	2.7	3.11	1.28	-0.39	3.06	1.95	-3.63	0.0599	0.000232	Soluble	-3.3	0.131	0.000505	Soluble	-3.85	0.0368	0.000143	Soluble	High	Yes	Yes	No	No	No	No	No	-5.67	0	0	0	0	0	0.55	0	0	0	3.76
ZINC1319234	C=C[C@H]1C[NH+]2CC[C@H]1C[C@@H]2[C@@H](c1ccnc2c1cc(OC)cc2)O	C20H25N2O2+	325.42	24	10	0.45	4	3	2	100.7	46.79	3.24	2.88	1.05	-1.45	3.11	1.77	-3.72	0.0625	0.000192	Soluble	-3.52	0.0977	0.0003	Soluble	-4.31	0.016	4.92e-05	Moderately soluble	High	Yes	Yes	No	No	No	No	No	-6.24	0	0	0	0	0	0.55	0	1	0	4.38
ZINC1481747	C[NH+](C[C@H](CC1c2ccccc2CCc2c1cccc2)C)C	C21H28N+	294.45	22	12	0.43	4	0	1	96.71	4.44	3.54	5.12	3.09	0.93	4.97	3.53	-5.03	0.00274	9.31e-06	Moderately soluble	-4.96	0.00325	1.1e-05	Moderately soluble	-6.86	4.05e-05	1.37e-07	Poorly soluble	High	Yes	No	Yes	No	No	Yes	No	-4.46	0	0	0	0	2	0.55	0	0	1	3.54
ZINC1482077	COc1ccc2c(c1)C(=O)N(C(=O)C2(C)C)CCc1ccc(cc1)S(=O)(=O)NC(=O)NC1CCCCC1	C27H33N3O6S	527.63	37	12	0.44	9	6	2	142.6	130.26	3.32	4.63	4.22	2.88	3.06	3.62	-5.67	0.00112	2.12e-06	Moderately soluble	-7.09	4.28e-05	8.11e-08	Poorly soluble	-7.76	9.13e-06	1.73e-08	Poorly soluble	Low	No	Yes	No	No	Yes	Yes	Yes	-6.23	1	2	0	0	0	0.55	0	1	3	3.83
ZINC1482162	C[NH+](CCC1=C([C@H](c2ccccn2)C)c2c(C1)cccc2)C	C20H25N2+	293.43	22	12	0.35	5	1	1	94.66	17.33	3.44	2.7	2.73	-0.3	4.61	2.64	-3.43	0.108	0.000368	Soluble	-2.72	0.563	0.00192	Soluble	-6.69	5.99e-05	2.04e-07	Poorly soluble	High	Yes	No	No	Yes	No	Yes	No	-6.17	0	0	0	0	0	0.55	0	0	0	3.94
ZINC1506908	[O-]C(=O)[C@@H](Cc1ccc(c(c1)O)O)[NH3+]	C9H11NO4	197.19	14	6	0.22	3	4	3	48.86	108.23	0.68	-2.74	-2	-3.73	-0.07	-1.57	0.54	691	3.5	Highly soluble	1.02	2060	10.5	Highly soluble	-0.72	37.6	0.191	Soluble	High	No	No	No	No	No	No	No	-9.45	0	1	0	0	2	0.55	1	1	1	1.81
ZINC1529213	O[C@@H]1CO[C@H]([C@H]([C@H]1O)O)O	C5H10O5	150.13	10	0	1	0	5	4	29.77	90.15	0.39	-3.02	-2.58	-2.32	-1.7	-1.84	1.13	2030	13.5	Highly soluble	1.69	7340	48.9	Highly soluble	2.23	25600	171	Soluble	Low	No	No	No	No	No	No	No	-9.36	0	3	0	0	2	0.55	0	0	1	3.8
ZINC1529270	OC[C@H]1O[C@]([C@H]([C@@H]1O)O)(O)CO	C6H12O6	180.16	12	0	1	2	6	5	35.77	110.38	0.18	-2.29	-3.22	-2.75	-1.84	-1.98	0.62	747	4.15	Highly soluble	0.51	579	3.21	Highly soluble	2.04	19700	109	Soluble	Low	No	No	No	No	No	No	No	-9.02	0	2	0	0	2	0.55	0	0	1	3.74
ZINC1529463	O=C1CC[C@@H]2[C@@]1(C)CC[C@H]1[C@@H]2CCc2c1ccc(c2)OS(=O)(=O)[O-]	C18H21O5S-	349.42	24	6	0.61	2	5	0	88.41	91.88	1.35	2.54	4.03	2.74	2.16	2.57	-3.66	0.0765	0.000219	Soluble	-4.12	0.0267	7.65e-05	Moderately soluble	-4.07	0.0298	8.53e-05	Moderately soluble	High	No	Yes	No	Yes	No	No	No	-6.63	0	0	0	0	0	0.56	0	2	0	3.99
ZINC1529732	[O-]C(=O)CSC[C@@H](C(=O)[O-])[NH3+]	C5H8NO4S-	178.19	11	0	0.6	5	4	1	37.36	133.2	0.34	-3.12	-4.17	-4.64	-0.96	-2.51	1.35	4000	22.4	Highly soluble	0.89	1380	7.75	Highly soluble	0.76	1030	5.81	Soluble	Low	No	No	No	No	No	No	No	-9.6	0	3	0	1	2	0.56	0	0	1	3.05
ZINC1530357	OC1C(O)C(O)C(C(C1O)O)O	C6H12O6	180.16	12	0	1	0	6	6	35.81	121.38	0.31	-3.71	-3.83	-3.16	-2.95	-2.67	1.38	4320	24	Highly soluble	1.75	10100	56.2	Highly soluble	3.29	348000	1930	Soluble	Low	No	Yes	No	No	No	No	No	-10.03	1	2	0	0	3	0.55	0	0	1	3.53
ZINC1530562	O=C([C@H](c1ccccc1)NC(=O)N1CCNC1=O)N[C@H]1C(=O)N2[C@@H]1SC([C@H]2C(=O)[O-])(C)C	C20H22N5O6S-	460.48	32	6	0.45	8	6	3	122.54	176.28	0.97	0.07	-2.71	0.87	-0.99	-0.36	-2.35	2.06	0.00447	Soluble	-3.33	0.218	0.000472	Soluble	-2.58	1.21	0.00263	Soluble	Low	No	Yes	No	No	No	No	No	-9.06	1	1	1	1	1	0.11	0	0	2	4.64
ZINC1530582	[NH3+][C@H](c1ccccc1)C(=O)N[C@H]1C(=O)N2[C@@H]1SCC(=C2C(=O)[O-])Cl	C15H14ClN3O4S	367.81	24	6	0.27	5	4	2	91.36	142.48	0.68	-1.79	-2.14	-3.01	0.28	-1.19	-0.85	52.2	0.142	Very soluble	-0.69	75.8	0.206	Very soluble	-2.53	1.09	0.00295	Soluble	Low	No	No	No	No	No	No	No	-9.81	0	1	1	1	0	0.55	0	0	1	4.42
ZINC1530585	O[C@@H](C(=O)N[C@H]1C(=O)N2[C@H]1SCC(=C2C(=O)[O-])CSc1nnnn1C)c1ccccc1	C18H17N6O5S2-	461.49	31	11	0.33	8	8	2	112.44	203.97	1.96	0.5	-2.27	0.97	-0.72	0.09	-2.75	0.819	0.00177	Soluble	-4.35	0.0205	4.43e-05	Moderately soluble	-2.3	2.31	0.00501	Soluble	Low	No	No	No	No	No	No	No	-8.76	1	1	1	1	1	0.11	0	0	2	4.81
ZINC1530586	O[C@H](C(=O)N[C@H]1C(=O)N2[C@H]1SCC(=C2C(=O)[O-])CSc1nnnn1C)c1ccccc1	C18H17N6O5S2-	461.49	31	11	0.33	8	8	2	112.44	203.97	1.89	0.5	-2.27	0.97	-0.72	0.08	-2.75	0.819	0.00177	Soluble	-4.35	0.0205	4.43e-05	Moderately soluble	-2.3	2.31	0.00501	Soluble	Low	No	No	No	No	No	No	No	-8.76	1	1	1	1	1	0.11	0	0	2	4.81
ZINC1530594	[O-]C(=O)C1=CCS[C@H]2N1C(=O)[C@@H]2NC(=O)/C(=N\OC)/c1csc(n1)N	C13H12N5O5S2-	382.39	25	5	0.31	6	7	2	92.25	203.58	1.25	0.05	-2.26	-0.99	-0.12	-0.41	-1.99	3.87	0.0101	Very soluble	-3.88	0.0506	0.000132	Soluble	-0.75	67.5	0.177	Soluble	Low	No	No	No	No	No	No	No	-8.6	0	1	1	1	1	0.11	0	2	1	4.41
ZINC1530603	[O-]C(=O)[C@H]1N2C(=O)[C@@H]([C@H]2SC1(C)C)NC(=O)c1c(C)onc1c1ccccc1Cl	C19H17ClN3O5S-	434.87	29	11	0.37	5	6	1	108.8	140.87	2.04	2.43	0.83	2.06	2.23	1.92	-4.02	0.0417	9.6e-05	Moderately soluble	-5.03	0.00405	9.31e-06	Moderately soluble	-4.81	0.00672	1.55e-05	Moderately soluble	High	No	No	No	Yes	No	No	Yes	-7.23	0	0	1	1	0	0.56	0	0	1	4.58
ZINC1530612	[O-]C(=O)[C@H]1N2C(=O)[C@@H]([C@H]2SC1(C)C)NC(=O)c1c(C)onc1c1c(Cl)cccc1Cl	C19H16Cl2N3O5S-	469.32	30	11	0.37	5	6	1	113.81	140.87	2.44	2.91	1.49	2.55	2.89	2.45	-4.52	0.014	2.99e-05	Moderately soluble	-5.53	0.00139	2.96e-06	Moderately soluble	-5.39	0.0019	4.06e-06	Moderately soluble	High	No	No	No	Yes	No	No	Yes	-7.1	0	0	1	1	0	0.56	0	0	1	4.59
ZINC1530619	CC[NH2+][C@H]1C[C@@H](C)S(=O)(=O)c2c1cc(s2)S(=O)(=O)N	C10H17N2O4S3+	325.45	19	5	0.6	3	5	2	74.55	155.91	1.2	0.41	1.42	-4.02	0.48	-0.1	-2.11	2.51	0.00771	Soluble	-3.25	0.183	0.000561	Soluble	-2.73	0.599	0.00184	Soluble	Low	No	No	No	No	No	No	No	-7.99	0	0	1	1	1	0.55	0	0	0	4.24
ZINC1530620	CC[NH2+][C@@H]1C[C@@H](C)S(=O)(=O)c2c1cc(s2)S(=O)(=O)N	C10H17N2O4S3+	325.45	19	5	0.6	3	5	2	74.55	155.91	1.11	0.41	1.42	-4.02	0.48	-0.12	-2.11	2.51	0.00771	Soluble	-3.25	0.183	0.000561	Soluble	-2.73	0.599	0.00184	Soluble	Low	No	No	No	No	No	No	No	-7.99	0	0	1	1	1	0.55	0	0	0	4.24
ZINC1530622	CC[NH2+][C@@H]1C[C@H](C)S(=O)(=O)c2c1cc(s2)S(=O)(=O)N	C10H17N2O4S3+	325.45	19	5	0.6	3	5	2	74.55	155.91	1.31	0.41	1.42	-4.02	0.48	-0.08	-2.11	2.51	0.00771	Soluble	-3.25	0.183	0.000561	Soluble	-2.73	0.599	0.00184	Soluble	Low	No	No	No	No	No	No	No	-7.99	0	0	1	1	1	0.55	0	0	0	4.24
ZINC1530733	COCCOC(=O)C1C(=NC(=C([C@@H]1c1cccc(c1)[N+](=O)[O-])C(=O)OC(C)C)C)C	C21H26N2O7	418.44	30	6	0.48	10	8	0	115.61	120.01	2.98	2.52	2.8	0.97	2.2	2.29	-3.51	0.129	0.000309	Soluble	-4.69	0.00861	2.06e-05	Moderately soluble	-4.53	0.0124	2.97e-05	Moderately soluble	High	No	No	Yes	Yes	Yes	Yes	Yes	-7.06	0	0	0	0	0	0.55	0	3	2	4.87
ZINC1530747	[O-]C(=O)[C@H]1N2C(=O)[C@@H]([C@H]2SC1(C)C)NC(=O)c1c(C)onc1c1ccccc1	C19H18N3O5S-	400.43	28	11	0.37	5	6	1	103.79	140.87	2.51	2.38	0.18	1.56	1.59	1.64	-3.78	0.066	0.000165	Soluble	-4.98	0.0042	1.05e-05	Moderately soluble	-4.23	0.0237	5.93e-05	Moderately soluble	Low	No	No	No	Yes	No	No	Yes	-7.05	0	0	1	1	0	0.56	0	0	1	4.5
ZINC1530768	CCC(=O)O[C@@](c1ccccc1)([C@@H](C[NH+](C)C)C)Cc1ccccc1	C22H30NO2+	340.48	25	12	0.41	9	2	1	104.48	30.74	3.7	4.18	2.75	0.47	4.66	3.15	-4.35	0.0154	4.51e-05	Moderately soluble	-4.53	0.00995	2.92e-05	Moderately soluble	-6.77	5.82e-05	1.71e-07	Poorly soluble	High	Yes	Yes	No	No	No	No	No	-5.41	0	0	0	0	0	0.55	0	0	2	3.56
ZINC1530771	CC[C@]1(C)OC(=O)N(C1=O)C	C7H11NO3	157.17	11	0	0.71	1	3	0	42.37	46.61	1.85	0.83	0.38	0.21	0.68	0.79	-1.27	8.41	0.0535	Very soluble	-1.39	6.38	0.0406	Very soluble	-1.11	12.3	0.0783	Soluble	High	No	No	No	No	No	No	No	-6.67	0	1	0	0	1	0.55	0	0	1	2.3
ZINC1530772	CC[C@@]1(C)OC(=O)N(C1=O)C	C7H11NO3	157.17	11	0	0.71	1	3	0	42.37	46.61	1.85	0.83	0.38	0.21	0.68	0.79	-1.27	8.41	0.0535	Very soluble	-1.39	6.38	0.0406	Very soluble	-1.11	12.3	0.0783	Soluble	High	No	No	No	No	No	No	No	-6.67	0	1	0	0	1	0.55	0	0	1	2.3
ZINC1530856	CC[C@@]1(CCC(=O)NC1=O)c1ccc(cc1)N	C13H16N2O2	232.28	17	6	0.38	2	2	2	69.54	72.19	1.32	1.22	0.98	1.59	2.13	1.45	-2.18	1.54	0.00664	Soluble	-2.33	1.08	0.00464	Soluble	-4.04	0.021	9.04e-05	Moderately soluble	High	No	No	No	No	No	No	No	-6.85	0	0	0	0	0	0.55	0	2	1	2.13
ZINC1530866	CCCC[NH+](CC[C@@H](c1cc2c(Cl)cc(cc2c2c1ccc(c2)C(F)(F)F)Cl)O)CCCC	C26H31Cl2F3NO+	501.43	33	14	0.46	11	4	2	134.83	24.67	5.22	8.61	8.06	2.79	8.78	6.69	-7.96	5.48e-06	1.09e-08	Poorly soluble	-9	4.97e-07	9.91e-10	Poorly soluble	-10.51	1.55e-08	3.08e-11	Insoluble	Low	No	Yes	No	No	No	Yes	No	-3.25	1	3	1	1	1	0.55	0	1	3	3.46
ZINC1530867	S=P(N1CC1)(N1CC1)N1CC1	C6H12N3PS	189.22	11	0	1	3	3	0	60.61	50.93	1.62	0.53	-0.33	0	1.33	0.63	-1.15	13.4	0.0709	Very soluble	-1.17	12.8	0.0675	Very soluble	0.23	325	1.72	Soluble	High	No	Yes	No	No	No	No	No	-7.08	0	0	0	0	1	0.55	0	2	1	3.6
ZINC1530877	O=C(c1ccccc1C(=O)[O-])Nc1ccc(cc1)S(=O)(=O)Nc1nccs1	C17H12N3O5S2-	402.42	27	17	0	7	6	2	98.46	164.91	1.09	1.09	2.26	1.1	1.76	1.46	-3.03	0.379	0.000943	Soluble	-4.15	0.0288	7.15e-05	Moderately soluble	-5.6	0.00102	2.52e-06	Moderately soluble	Low	No	No	No	No	No	No	No	-7.98	0	0	1	1	1	0.11	0	0	1	2.83
ZINC1530961	[NH3+]CCC[C@](C(=O)[O-])(C(F)F)[NH3+]	C6H13F2N2O2+	183.18	12	0	0.83	5	4	2	38.86	95.41	0.74	-2.92	-2.16	-7.47	-0.25	-2.41	1.19	2860	15.6	Highly soluble	1.48	5470	29.9	Highly soluble	-0.41	71.9	0.393	Soluble	High	No	No	No	No	No	No	No	-9.49	0	2	0	0	2	0.55	0	0	1	2.2
ZINC1530967	CC[C@@H](C(c1ccccc1)(c1ccccc1)C[C@@H]([NH+](C)C)C)OC(=O)C	C23H32NO2+	354.51	26	12	0.43	9	2	1	109.29	30.74	3.65	4.27	3.24	0.68	4.89	3.35	-4.48	0.0119	3.35e-05	Moderately soluble	-4.63	0.00835	2.36e-05	Moderately soluble	-6.79	5.76e-05	1.63e-07	Poorly soluble	High	Yes	Yes	No	No	No	No	No	-5.43	0	0	0	0	0	0.55	0	0	3	3.64
ZINC1531682	CCCCc1ccc(nc1)C(=O)[O-]	C10H12NO2-	178.21	13	6	0.4	4	3	0	48.64	53.02	1.68	2.59	0.79	0.17	2.19	1.49	-2.65	0.395	0.00222	Soluble	-3.35	0.0792	0.000444	Soluble	-3	0.179	0.001	Soluble	High	Yes	No	Yes	No	No	No	No	-5.55	0	0	0	0	1	0.85	0	0	1	1.81
ZINC1532344	O=C1[C@H](NC(=O)c2c(C)onc2c2c(F)cccc2Cl)[C@@H]2N1[C@H](C(=O)[O-])C(S2)(C)C	C19H16ClFN3O5S-	452.86	30	11	0.37	5	7	1	108.76	140.87	2.27	2.61	1.39	2.44	2.67	2.28	-4.23	0.0265	5.84e-05	Moderately soluble	-5.22	0.00274	6.06e-06	Moderately soluble	-5.07	0.00383	8.45e-06	Moderately soluble	High	No	No	No	Yes	No	No	Yes	-7.21	0	0	1	1	0	0.56	0	0	1	4.61
ZINC1532561	O[C@H]1CO[C@@H]([C@H]([C@@H]1O)O)O	C5H10O5	150.13	10	0	1	0	5	4	29.77	90.15	-0.14	-3.02	-2.58	-2.32	-1.7	-1.95	1.13	2030	13.5	Highly soluble	1.69	7340	48.9	Highly soluble	2.23	25600	171	Soluble	Low	No	No	No	No	No	No	No	-9.36	0	3	0	0	2	0.55	0	0	1	3.8
ZINC1532588	O[C@@H]1CO[C@H]([C@H]([C@@H]1O)O)O	C5H10O5	150.13	10	0	1	0	5	4	29.77	90.15	-0.11	-3.02	-2.58	-2.32	-1.7	-1.95	1.13	2030	13.5	Highly soluble	1.69	7340	48.9	Highly soluble	2.23	25600	171	Soluble	Low	No	No	No	No	No	No	No	-9.36	0	3	0	0	2	0.55	0	0	1	3.8
ZINC1532609	NC(=O)CC[C@H](C(=O)[O-])[NH3+]	C5H10N2O3	146.14	10	0	0.6	4	3	2	32.85	110.86	0.31	-3.15	-3.39	-5.05	-1.42	-2.54	1.5	4650	31.8	Highly soluble	1.39	3580	24.5	Highly soluble	0.68	698	4.78	Soluble	Low	No	No	No	No	No	No	No	-9.43	0	3	0	0	2	0.55	0	0	1	1.76
ZINC1532749	[O-]C(=O)[C@@H](CCCNC(=[NH2+])N)[NH3+]	C6H15N4O2+	175.21	12	0	0.67	6	2	4	44.52	131.41	-0.11	-4.2	-5.21	-4.67	-1.61	-3.16	2.12	22900	131	Highly soluble	2.05	19500	112	Highly soluble	0.06	201	1.15	Soluble	Low	No	No	No	No	No	No	No	-10.35	0	1	0	0	2	0.55	0	2	1	2.2
ZINC1542393	CCCC[NH+](CC[C@H](c1cc2c(Cl)cc(cc2c2c1ccc(c2)C(F)(F)F)Cl)O)CCCC	C26H31Cl2F3NO+	501.43	33	14	0.46	11	4	2	134.83	24.67	4.96	8.61	8.06	2.79	8.78	6.64	-7.96	5.48e-06	1.09e-08	Poorly soluble	-9	4.97e-07	9.91e-10	Poorly soluble	-10.51	1.55e-08	3.08e-11	Insoluble	Low	No	Yes	No	No	No	Yes	No	-3.25	1	3	1	1	1	0.55	0	1	3	3.46
ZINC1542901	O=C(c1ccccc1)O[C@H](COc1cccc2c1cc([nH]2)C)C[NH2+]C(C)(C)C	C23H29N2O3+	381.49	28	15	0.35	9	3	2	113.5	67.93	3.83	4.72	3.44	-0.74	4.97	3.24	-4.98	0.00398	1.04e-05	Moderately soluble	-5.88	0.000508	1.33e-06	Moderately soluble	-7.67	8.06e-06	2.11e-08	Poorly soluble	High	Yes	No	Yes	No	Yes	No	No	-5.28	0	0	0	0	0	0.55	0	0	3	3.53
ZINC1542906	C[NH2+]CCc1ccc(c(c1)OC(=O)C(C)C)OC(=O)C(C)C	C17H26NO4+	308.39	22	6	0.53	9	4	1	87.31	69.21	3.43	2.93	1.55	-0.84	3.42	2.1	-3.21	0.192	0.000623	Soluble	-4.05	0.0278	9.01e-05	Moderately soluble	-4.66	0.00681	2.21e-05	Moderately soluble	High	Yes	No	Yes	No	No	No	No	-6.1	0	0	0	0	0	0.55	0	1	1	2.47
ZINC1542927	COc1ccc(cc1C(=O)NCC[NH+](CC)CC)S(=O)(=O)C	C15H25N2O4S+	329.44	22	6	0.53	9	4	2	87.21	85.29	2.53	0.9	0.83	-2.37	1.53	0.68	-2.06	2.89	0.00876	Soluble	-2.28	1.74	0.00529	Soluble	-4.54	0.00946	2.87e-05	Moderately soluble	High	No	No	No	No	No	No	No	-7.67	0	0	0	0	0	0.55	0	0	1	2.64
ZINC1542929	C[NH+](CC(=O)c1ccc(cc1)Cl)CCCN1c2ccccc2CCc2c1cccc2	C26H28ClN2O+	419.97	30	18	0.27	7	1	1	129.75	24.75	3.88	6.84	3.98	0.88	5.69	4.25	-6.73	7.73e-05	1.84e-07	Poorly soluble	-7.17	2.85e-05	6.78e-08	Poorly soluble	-9.13	3.11e-07	7.4e-10	Poorly soluble	High	Yes	Yes	Yes	Yes	Yes	No	No	-4.01	0	0	0	0	1	0.55	0	0	2	3.86
ZINC1545060	OC[C@@H]1O[C@@H](C[C@H]1O)n1cnc2c1nc(Cl)nc2N	C10H12ClN5O3	285.69	19	9	0.5	2	6	3	66.52	119.31	1.46	0.02	-0.61	-0.98	-0.84	-0.19	-1.84	4.11	0.0144	Very soluble	-2.08	2.39	0.00837	Soluble	-1.01	28.2	0.0986	Soluble	High	No	No	No	No	No	No	No	-8.03	0	1	0	0	0	0.55	0	0	0	3.65
ZINC1567421	c1ccc2c(c1)N(C[C@@H]1C[NH+]3CCC1CC3)c1c(S2)cccc1	C20H23N2S+	323.48	23	12	0.4	2	0	1	105.14	32.98	3.25	4.56	2.45	0.85	3.57	2.94	-4.97	0.00345	1.07e-05	Moderately soluble	-4.98	0.00342	1.06e-05	Moderately soluble	-5.55	0.00091	2.81e-06	Moderately soluble	High	Yes	Yes	Yes	No	No	Yes	Yes	-5.04	0	0	0	0	0	0.55	1	0	1	4.8
ZINC1571045	O[C@@H]1[C@H](O)[C@@H](O[C@H]1n1cnc2c1ncnc2N)COP(=O)([O-])[O-]	C10H12N5O7P--	345.21	23	9	0.5	4	10	3	70.52	201.54	0.22	-3.52	-1.3	-3.47	-3.53	-2.32	0.21	562	1.63	Highly soluble	-0.13	255	0.74	Very soluble	1.26	6340	18.4	Soluble	Low	No	No	No	No	No	No	No	-10.9	1	1	1	1	2	0.11	0	1	0	4.28
ZINC1586788	CCCOC(=O)c1ccc(cc1)O	C10H12O3	180.2	13	6	0.3	4	3	1	49.36	46.53	2.09	3.04	1.96	1.94	1.91	2.19	-2.95	0.202	0.00112	Soluble	-3.68	0.0374	0.000208	Soluble	-2.71	0.354	0.00196	Soluble	High	Yes	No	No	No	No	No	No	-5.24	0	0	0	0	1	0.55	0	0	1	1.4
ZINC1596709	[O-]C(=O)CSC[C@H](C(=O)[O-])[NH3+]	C5H8NO4S-	178.19	11	0	0.6	5	4	1	37.36	133.2	0.17	-3.12	-4.17	-4.64	-0.96	-2.54	1.35	4000	22.4	Highly soluble	0.89	1380	7.75	Highly soluble	0.76	1030	5.81	Soluble	Low	No	No	No	No	No	No	No	-9.6	0	3	0	1	2	0.56	0	0	1	3.05
ZINC1605334	OC[C@@H]([C@@H](c1ccc(cc1)S(=O)(=O)C)O)NC(=O)C(Cl)Cl	C12H15Cl2NO5S	356.22	21	6	0.42	7	5	3	78.65	112.08	1.53	-0.27	1.16	0.53	1.25	0.84	-1.63	8.39	0.0236	Very soluble	-1.62	8.45	0.0237	Very soluble	-3.3	0.179	0.000502	Soluble	High	No	No	No	No	No	No	No	-8.66	0	0	0	0	0	0.55	0	1	1	2.9
ZINC1607283	[NH3+][C@H](c1ccccc1)C(=O)N[C@@H]1C(=O)N2[C@H]1SC([C@H]2C(=O)[O-])(C)C	C16H19N3O4S	349.4	24	6	0.44	5	4	2	91.88	142.48	1.87	-1.13	-2.44	-2.93	0.01	-0.92	-1.15	24.8	0.0709	Very soluble	-1.37	14.9	0.0426	Very soluble	-2.21	2.15	0.00615	Soluble	Low	No	No	No	No	No	No	No	-9.23	0	1	1	1	0	0.55	0	0	0	4.16
ZINC1641058	OCC[NH+](C)C	C4H12NO+	90.14	6	0	1	2	1	2	26.66	24.67	1.52	-0.42	-1.88	-3.87	-0.64	-1.06	0	89.7	0.995	Very soluble	0.37	210	2.33	Highly soluble	-0.13	67.4	0.748	Soluble	Low	No	No	No	No	No	No	No	-7.15	0	4	0	0	2	0.55	0	0	1	1
ZINC1666602	CC(=O)N(C)C	C4H9NO	87.12	6	0	0.75	1	1	0	24.44	20.31	1.46	-0.77	0.09	0.08	-0.48	0.08	0.17	129	1.48	Highly soluble	0.82	577	6.63	Highly soluble	-0.22	52.1	0.598	Soluble	Low	No	No	No	No	No	No	No	-7.38	0	3	0	0	2	0.55	0	0	1	1
ZINC1678600	Oc1cccc(c1)[C@H]([C@H]([NH3+])C)O	C9H14NO2+	168.21	12	6	0.33	2	2	3	48.17	68.1	1.45	-0.27	-0.27	-3.04	0.67	-0.29	-0.95	18.8	0.112	Very soluble	-0.7	33.5	0.199	Very soluble	-1.36	7.26	0.0432	Soluble	High	No	No	No	No	No	No	No	-7.52	0	0	0	0	1	0.55	0	0	1	2.03
ZINC1686197	OC[C@H]1O[C@@H](C[C@@H]1O)n1cnc2c1nc(Cl)nc2N	C10H12ClN5O3	285.69	19	9	0.5	2	6	3	66.52	119.31	1.54	0.02	-0.61	-0.98	-0.84	-0.17	-1.84	4.11	0.0144	Very soluble	-2.08	2.39	0.00837	Soluble	-1.01	28.2	0.0986	Soluble	High	No	No	No	No	No	No	No	-8.03	0	1	0	0	0	0.55	0	0	0	3.65
ZINC1692922	CCC[C@@](COC(=O)N)(COC(=O)NCCCC)C	C13H26N2O4	274.36	19	0	0.85	12	4	2	73.2	90.65	3.14	2.35	2.41	1.57	1.45	2.18	-2.23	1.62	0.0059	Soluble	-3.89	0.0351	0.000128	Soluble	-3	0.278	0.00101	Soluble	High	No	No	No	No	No	No	No	-6.31	0	0	1	0	0	0.55	0	1	1	3.29
ZINC1699600	CC(=CC[NH+]1CC[C@]2([C@H]([C@@H]1Cc1c2cc(cc1)O)C)C)C	C19H28NO+	286.43	21	6	0.58	2	1	2	94.23	24.67	3.31	3.31	2.08	-0.01	3.83	2.5	-3.78	0.0475	0.000166	Soluble	-3.5	0.0897	0.000313	Soluble	-4.38	0.0118	4.12e-05	Moderately soluble	High	Yes	Yes	No	No	No	No	No	-5.7	0	0	0	0	0	0.55	0	1	0	4.17
ZINC1707332	CC/C=C(/C1(CC)C(=O)NC(=O)NC1=O)\C	C11H16N2O3	224.26	16	0	0.55	3	3	2	66.57	75.27	1.47	1.69	0.34	0.84	1.54	1.18	-2.1	1.79	0.008	Soluble	-2.89	0.292	0.0013	Soluble	-2.82	0.342	0.00152	Soluble	High	No	No	Yes	No	No	No	No	-6.47	0	0	0	0	0	0.55	0	2	1	2.81
ZINC1707475	C[C@@H](C(=O)N[C@H]1C(=O)N2[C@@H]1SC([C@H]2C(=O)[O-])(C)C)Oc1ccccc1	C17H19N2O5S-	363.41	25	6	0.47	6	5	1	94.25	124.07	1.8	2.2	-0.63	1.26	0.79	1.08	-3.26	0.199	0.000549	Soluble	-4.44	0.0132	3.63e-05	Moderately soluble	-2.69	0.747	0.00206	Soluble	High	No	No	No	No	No	No	No	-6.95	0	1	0	0	0	0.56	0	0	1	4.3
ZINC1707875	COc1ccc2c3c1O[C@@H]1[C@]43CC[NH+]([C@@H](C2)[C@@H]4CCC1=O)C	C18H22NO3+	300.37	22	6	0.61	1	3	1	87.21	39.97	2.52	0.11	0.14	-1.7	2.85	0.78	-1.91	3.72	0.0124	Very soluble	-0.5	94	0.313	Very soluble	-3.93	0.0356	0.000119	Soluble	High	No	Yes	No	No	No	No	No	-8.05	0	0	0	0	0	0.55	0	0	0	4.59
ZINC1726065	O=C(N[C@@H]1C(=O)N2[C@H]1SC([C@H]2C(=O)[O-])(C)C)COc1ccccc1	C16H17N2O5S-	349.38	24	6	0.44	6	5	1	89.44	124.07	1.48	2.09	-1.02	1.02	0.57	0.83	-3.11	0.27	0.000773	Soluble	-4.33	0.0165	4.73e-05	Moderately soluble	-2.67	0.754	0.00216	Soluble	High	No	No	No	No	No	No	No	-6.95	0	1	0	0	0	0.56	0	0	0	4.05
ZINC1757652	OC[C@H]1Oc2ccc(cc2O[C@@H]1c1ccc(c(c1)OC)O)[C@H]1Oc2cc(O)cc(c2C(=O)[C@H]1O)O	C25H22O10	482.44	35	18	0.24	4	10	5	120.55	155.14	2.58	1.9	1.71	-0.4	1.92	1.54	-4.14	0.0346	7.17e-05	Moderately soluble	-4.78	0.00799	1.66e-05	Moderately soluble	-4.5	0.0153	3.16e-05	Moderately soluble	Low	No	No	No	No	No	No	Yes	-7.89	0	1	1	1	1	0.55	0	0	1	4.92
ZINC1769096	OC[C@@H]([C@H]([C@H](Cn1c2cc(C)c(cc2nc2c1nc(=O)[nH]c2=O)C)O)O)O	C17H20N4O6	376.36	27	14	0.41	5	8	5	96.99	161.56	1.22	-1.46	-1.68	-0.54	1.09	-0.27	-1.31	18.5	0.0493	Very soluble	-1.43	14	0.0372	Very soluble	-2.62	0.903	0.0024	Soluble	Low	No	No	No	No	No	No	No	-9.63	0	1	1	1	1	0.55	0	1	1	3.84
ZINC1842501	C[NH2+]C[C@H]([C@@H]([C@H]([C@H](CO)O)O)O)O	C7H18NO5+	196.22	13	0	1	6	5	6	45.63	117.76	0.74	-2.85	-4.38	-6.1	-1.72	-2.86	1.13	2680	13.6	Highly soluble	0.93	1680	8.58	Highly soluble	1.55	6930	35.3	Soluble	Low	No	No	No	No	No	No	No	-9.52	1	1	0	0	3	0.55	0	0	1	3.17
ZINC1843304	CCCC[C@@H](C(=O)N(c1ccccc1)Nc1ccccc1)C(=O)[O-]	C19H21N2O3-	325.38	24	12	0.26	9	3	1	93.54	72.47	2.72	4.86	2.41	3.48	2.41	3.18	-4.7	0.00656	2.02e-05	Moderately soluble	-6.12	0.000249	7.65e-07	Poorly soluble	-5.25	0.00183	5.62e-06	Moderately soluble	High	Yes	No	Yes	Yes	Yes	No	No	-4.83	0	0	0	0	0	0.85	0	1	2	3.13
ZINC1846741	CCOc1ccccc1OCC[NH2+][C@H](Cc1ccc(c(c1)S(=O)(=O)N)OC)C	C20H29N2O5S+	409.52	28	12	0.4	11	6	2	109.49	112.84	3.04	2.73	2.4	-2.27	2.6	1.7	-3.69	0.0836	0.000204	Soluble	-4.75	0.00722	1.76e-05	Moderately soluble	-6.5	0.00013	3.18e-07	Poorly soluble	High	No	Yes	No	No	No	No	No	-6.86	0	0	1	0	0	0.55	0	0	2	3.65
ZINC1847743	CC[NH+](CCOC(=O)C1(CCCC1)c1ccccc1)CC	C18H28NO2+	290.42	21	6	0.61	8	2	1	87.49	30.74	3.56	3.91	1.97	-0.58	3.9	2.55	-3.79	0.0474	0.000163	Soluble	-4.25	0.0162	5.57e-05	Moderately soluble	-5.19	0.00189	6.5e-06	Moderately soluble	High	Yes	No	No	No	No	No	No	-5.3	0	0	0	0	0	0.55	0	0	2	2.71
ZINC1850621	CCC(=O)N([C@H](C[NH+]1CCCCC1)C)c1ccccn1	C16H26N3O+	276.4	20	6	0.62	6	2	1	87.57	37.64	3.37	2.33	0.9	-1.64	2.27	1.45	-2.85	0.393	0.00142	Soluble	-2.76	0.481	0.00174	Soluble	-3.67	0.0596	0.000216	Soluble	High	Yes	No	No	No	No	No	No	-6.33	0	0	0	0	0	0.55	0	0	0	2.89
ZINC1851155	CC([C@H](C(=O)OCCOCn1cnc2c1nc(N)[nH]c2=O)[NH3+])C	C13H21N6O4+	325.34	23	9	0.54	8	6	3	83.8	152.76	1.05	-0.61	-1.66	-4.87	-0.24	-1.27	-1.23	19	0.0583	Very soluble	-2.13	2.43	0.00748	Soluble	-2.02	3.09	0.00948	Soluble	Low	No	No	No	No	No	No	No	-8.72	0	1	1	1	1	0.55	0	0	1	3.57
ZINC1851415	CC(Cc1ccc(cc1)[C@H](C(=O)OCc1ccccn1)C)C	C19H23NO2	297.39	22	12	0.37	7	3	0	88.78	39.19	2.72	4.33	3.98	3.09	4.79	3.78	-4.35	0.0132	4.43e-05	Moderately soluble	-4.87	0.00404	1.36e-05	Moderately soluble	-6.29	0.000153	5.14e-07	Poorly soluble	High	Yes	No	No	Yes	Yes	Yes	No	-5.04	0	0	0	0	0	0.55	0	0	1	3.06
ZINC1957899	CC[NH+](CCSC(=O)C(c1ccccc1)c1ccccc1)CC	C20H26NOS+	328.49	23	12	0.35	9	1	1	101.49	46.81	3.9	4.72	3	0.1	4.74	3.29	-4.64	0.00748	2.28e-05	Moderately soluble	-5.43	0.00121	3.7e-06	Moderately soluble	-6.73	6.17e-05	1.88e-07	Poorly soluble	High	Yes	No	Yes	Yes	No	No	No	-4.95	0	0	0	0	0	0.55	0	1	2	3.15
ZINC1999542	C1CCC(CC1)C(C1CCCCC1)C[C@H]1CCCC[NH2+]1	C19H36N+	278.5	20	0	1	4	0	1	94.78	16.61	4.09	6.8	3.89	1.09	4.91	4.16	-5.59	0.000721	2.59e-06	Moderately soluble	-6.96	3.08e-05	1.11e-07	Poorly soluble	-4.41	0.0108	3.86e-05	Moderately soluble	High	Yes	No	No	No	No	Yes	No	-3.17	0	0	0	0	2	0.55	0	0	1	2.77
ZINC1999543	C1CCC(CC1)C(C1CCCCC1)C[C@@H]1CCCC[NH2+]1	C19H36N+	278.5	20	0	1	4	0	1	94.78	16.61	4.08	6.8	3.89	1.09	4.91	4.15	-5.59	0.000721	2.59e-06	Moderately soluble	-6.96	3.08e-05	1.11e-07	Poorly soluble	-4.41	0.0108	3.86e-05	Moderately soluble	High	Yes	No	No	No	No	Yes	No	-3.17	0	0	0	0	2	0.55	0	0	1	2.77
ZINC2001884	CCN(C(=O)Nc1ccc(c(c1)C(=O)C)OC[C@H](C[NH2+]C(C)(C)C)O)CC	C20H34N3O4+	380.5	27	6	0.6	12	4	3	109.25	95.48	3.88	1.92	1.67	-2.16	2.42	1.55	-2.78	0.63	0.00166	Soluble	-3.55	0.108	0.000283	Soluble	-4.88	0.00503	1.32e-05	Moderately soluble	High	No	Yes	No	No	No	No	No	-7.26	0	0	1	0	0	0.55	0	0	2	3.7
ZINC2005072	[O-]C(=O)C(Oc1ccc(cc1)[C@@H]1CC1(Cl)Cl)(C)C	C13H13Cl2O3-	288.15	18	6	0.46	4	3	0	69.32	49.36	2.39	3.42	2.26	2.65	3.38	2.82	-3.76	0.0496	0.000172	Soluble	-4.14	0.021	7.3e-05	Moderately soluble	-4.15	0.0204	7.1e-05	Moderately soluble	High	Yes	No	Yes	Yes	No	No	No	-5.63	0	0	0	0	0	0.85	0	1	0	2.38
ZINC2007682	CC[C@H](C(c1ccccc1)(c1ccccc1)C[C@@H]([NH+](C)C)C)OC(=O)C	C23H32NO2+	354.51	26	12	0.43	9	2	1	109.29	30.74	3.81	4.27	3.24	0.68	4.89	3.38	-4.48	0.0119	3.35e-05	Moderately soluble	-4.63	0.00835	2.36e-05	Moderately soluble	-6.79	5.76e-05	1.63e-07	Poorly soluble	High	Yes	Yes	No	No	No	No	No	-5.43	0	0	0	0	0	0.55	0	0	3	3.64
ZINC2008250	O=C([C@@H](c1ccccc1)NC(=O)N1CCNC1=O)N[C@@H]1C(=O)N2[C@H]1SC([C@@H]2C(=O)[O-])(C)C	C20H22N5O6S-	460.48	32	6	0.45	8	6	3	122.54	176.28	1.22	0.07	-2.71	0.87	-0.99	-0.31	-2.35	2.06	0.00447	Soluble	-3.33	0.218	0.000472	Soluble	-2.58	1.21	0.00263	Soluble	Low	No	Yes	No	No	No	No	No	-9.06	1	1	1	1	1	0.11	0	0	2	4.64
ZINC2009463	N#Cc1ccccc1OC[C@H](C[NH2+]C(C)(C)C)O	C14H21N2O2+	249.33	18	6	0.5	6	3	2	71.75	69.86	2.68	1.91	0.66	-2.57	2.16	0.97	-2.44	0.906	0.00363	Soluble	-3	0.249	0.000999	Soluble	-3.77	0.0419	0.000168	Soluble	High	No	No	No	No	No	No	No	-6.46	0	0	0	0	0	0.55	0	0	1	2.72
ZINC2011568	c1ccc2c(c1)N(C[C@H]1C[NH+]3CCC1CC3)c1c(S2)cccc1	C20H23N2S+	323.48	23	12	0.4	2	0	1	105.14	32.98	3.45	4.56	2.45	0.85	3.57	2.98	-4.97	0.00345	1.07e-05	Moderately soluble	-4.98	0.00342	1.06e-05	Moderately soluble	-5.55	0.00091	2.81e-06	Moderately soluble	High	Yes	Yes	Yes	No	No	Yes	No	-5.04	0	0	0	0	0	0.55	1	0	1	4.8
ZINC2014721	CCOC(=O)[C@]1(CCC=C[C@H]1[NH+](C)C)c1ccccc1	C17H24NO2+	274.38	20	6	0.47	5	2	1	82.21	30.74	3.24	3.06	1.35	-0.9	2.69	1.89	-3.36	0.12	0.000436	Soluble	-3.37	0.116	0.000425	Soluble	-3.95	0.0311	0.000113	Soluble	High	Yes	No	No	No	No	No	No	-5.8	0	0	0	0	0	0.55	0	1	0	3.7
ZINC2014723	CCOC(=O)[C@@]1(CCC=C[C@@H]1[NH+](C)C)c1ccccc1	C17H24NO2+	274.38	20	6	0.47	5	2	1	82.21	30.74	3.2	3.06	1.35	-0.9	2.69	1.88	-3.36	0.12	0.000436	Soluble	-3.37	0.116	0.000425	Soluble	-3.95	0.0311	0.000113	Soluble	High	Yes	No	No	No	No	No	No	-5.8	0	0	0	0	0	0.55	0	1	0	3.7
ZINC2014875	C=CCOc1ccc(cc1Cl)CC(=O)[O-]	C11H10ClO3-	225.65	15	6	0.18	5	3	0	56.69	49.36	1.93	2.48	1.2	2.43	2.93	2.19	-2.77	0.385	0.00171	Soluble	-3.16	0.156	0.00069	Soluble	-3.39	0.0917	0.000406	Soluble	High	Yes	No	Yes	No	No	No	No	-5.92	0	0	0	0	0	0.85	0	1	1	1.79
ZINC2018339	COc1cccc(c1)C(=O)CC[NH2+][C@H]([C@@H](c1ccccc1)O)C	C19H24NO3+	314.4	23	12	0.32	8	3	2	92.06	63.14	3.2	2.36	1.63	-1.6	3.58	1.83	-3.13	0.231	0.000734	Soluble	-3.33	0.148	0.000472	Soluble	-5.74	0.000567	1.8e-06	Moderately soluble	High	Yes	Yes	No	No	No	No	No	-6.54	0	0	0	0	0	0.55	0	0	1	2.98
ZINC2018341	COc1cccc(c1)C(=O)CC[NH2+][C@H]([C@H](c1ccccc1)O)C	C19H24NO3+	314.4	23	12	0.32	8	3	2	92.06	63.14	3.41	2.36	1.63	-1.6	3.58	1.88	-3.13	0.231	0.000734	Soluble	-3.33	0.148	0.000472	Soluble	-5.74	0.000567	1.8e-06	Moderately soluble	High	Yes	Yes	No	No	No	No	No	-6.54	0	0	0	0	0	0.55	0	0	1	2.98
ZINC2018982	C[C@@H]([C@](Cc1ccc(cc1)Cl)(O)C)C[NH+](C)C	C14H23ClNO+	256.79	17	6	0.57	5	1	2	75.42	24.67	3.29	3.21	1.41	-0.49	3.15	2.12	-3.39	0.106	0.000412	Soluble	-3.4	0.102	0.000398	Soluble	-4.23	0.015	5.83e-05	Moderately soluble	High	Yes	No	No	No	No	No	No	-5.59	0	0	0	0	0	0.55	0	0	0	2.55
ZINC2019839	Oc1cc(O)cc(c1)[C@@H](C[NH2+]CCCn1cnc2c1c(=O)n(C)c(=O)n2C)O	C18H24N5O5+	390.41	28	15	0.39	7	6	4	105.02	139.12	2.21	-0.46	-1.79	-3.98	-0.07	-0.82	-1.91	4.86	0.0124	Very soluble	-2	3.95	0.0101	Very soluble	-2.72	0.74	0.0019	Soluble	Low	No	No	No	No	No	No	No	-9.01	0	1	0	1	0	0.55	0	0	1	3.43
ZINC2021839	CCOC(=O)[C@@H]([NH2+][C@@H](C(=O)N1Cc2ccccc2C[C@@H]1C(=O)[O-])C)CCc1ccccc1	C25H30N2O5	438.52	32	12	0.4	11	5	1	123.81	103.35	3.44	1.24	-0.33	-1.52	3.39	1.24	-2.89	0.563	0.00128	Soluble	-3.01	0.43	0.000981	Soluble	-5.89	0.00057	1.3e-06	Moderately soluble	High	No	Yes	No	No	No	No	No	-8.09	0	0	1	0	0	0.55	0	0	2	4.13
ZINC2032320	O=C(c1ccccc1)O[C@@H](COc1cccc2c1cc([nH]2)C)C[NH2+]C(C)(C)C	C23H29N2O3+	381.49	28	15	0.35	9	3	2	113.5	67.93	3.71	4.72	3.44	-0.74	4.97	3.22	-4.98	0.00398	1.04e-05	Moderately soluble	-5.88	0.000508	1.33e-06	Moderately soluble	-7.67	8.06e-06	2.11e-08	Poorly soluble	High	Yes	No	Yes	No	Yes	No	No	-5.28	0	0	0	0	0	0.55	0	0	3	3.53
ZINC2033589	OC[C@H]1Oc2ccc(cc2O[C@@H]1c1ccc(c(c1)OC)O)[C@H]1Oc2cc(O)cc(c2C(=O)[C@@H]1O)O	C25H22O10	482.44	35	18	0.24	4	10	5	120.55	155.14	2.4	1.9	1.71	-0.4	1.92	1.51	-4.14	0.0346	7.17e-05	Moderately soluble	-4.78	0.00799	1.66e-05	Moderately soluble	-4.5	0.0153	3.16e-05	Moderately soluble	Low	No	No	No	No	No	No	Yes	-7.89	0	1	1	1	1	0.55	0	0	1	4.92
ZINC2033590	OC[C@H]1Oc2ccc(cc2O[C@H]1c1ccc(c(c1)OC)O)[C@H]1Oc2cc(O)cc(c2C(=O)[C@H]1O)O	C25H22O10	482.44	35	18	0.24	4	10	5	120.55	155.14	2.9	1.9	1.71	-0.4	1.92	1.61	-4.14	0.0346	7.17e-05	Moderately soluble	-4.78	0.00799	1.66e-05	Moderately soluble	-4.5	0.0153	3.16e-05	Moderately soluble	Low	No	No	No	No	No	No	Yes	-7.89	0	1	1	1	1	0.55	0	0	1	4.92
ZINC2036738	Oc1ccc2c(c1)CC[C@@H]1[C@H]2CC[C@@]2([C@H]1CC[C@@H]2O)C	C18H24O2	272.38	20	6	0.67	0	2	2	81.03	40.46	2.63	4.01	3.61	3.53	3.25	3.41	-4.28	0.0144	5.28e-05	Moderately soluble	-4.56	0.00747	2.74e-05	Moderately soluble	-3.75	0.0485	0.000178	Soluble	High	Yes	Yes	No	No	No	Yes	No	-5.11	0	0	0	0	0	0.55	0	0	1	3.49
ZINC2037707	CC[N+]1(CC)CCC(=C(c2ccccc2)c2ccccc2)[C@@H]1C	C22H28N+	306.46	23	12	0.36	4	0	0	105.23	0	0.46	5.09	4.76	1.07	2.61	2.8	-5.07	0.00262	8.53e-06	Moderately soluble	-4.83	0.0045	1.47e-05	Moderately soluble	-7.83	4.48e-06	1.46e-08	Poorly soluble	Low	No	Yes	Yes	No	No	Yes	Yes	-4.56	0	0	0	0	2	0.55	0	1	1	3.57
ZINC2037958	CCC[C@](COC(=O)N)(COC(=O)NCCCC)C	C13H26N2O4	274.36	19	0	0.85	12	4	2	73.2	90.65	3.11	2.35	2.41	1.57	1.45	2.18	-2.23	1.62	0.0059	Soluble	-3.89	0.0351	0.000128	Soluble	-3	0.278	0.00101	Soluble	High	No	No	No	No	No	No	No	-6.31	0	0	1	0	0	0.55	0	1	1	3.29
ZINC2041046	CN/C(=[NH+]\C)/NCc1ccccc1	C10H16N3+	178.25	13	6	0.3	4	0	3	55.79	38.03	1.89	0.93	-1.09	1.81	1.59	1.03	-1.61	4.39	0.0246	Very soluble	-1.31	8.63	0.0484	Very soluble	-3.77	0.0302	0.000169	Soluble	Low	No	No	No	No	No	No	No	-6.73	0	1	0	0	1	0.55	0	2	1	1.96
ZINC2041300	COc1ccccc1OC[C@H]1CNC(=O)O1	C11H13NO4	223.23	16	6	0.36	4	4	1	60.12	56.79	1.8	1.42	0.8	0.57	1.4	1.2	-2.13	1.65	0.00738	Soluble	-2.22	1.35	0.00606	Soluble	-2.96	0.246	0.0011	Soluble	High	Yes	No	No	No	No	No	No	-6.65	0	0	0	0	0	0.55	0	0	1	2.68
ZINC2041322	CC[C@@H](C(COC(=O)N)(COC(=O)N)C)C	C10H20N2O4	232.28	16	0	0.8	8	4	2	58.69	104.64	1.94	1.39	1.23	0.72	-0.04	1.05	-1.63	5.47	0.0236	Very soluble	-3.19	0.15	0.000644	Soluble	-1.02	22.1	0.0951	Soluble	High	No	No	No	No	No	No	No	-6.73	0	0	0	0	0	0.55	0	1	2	2.81
ZINC2047403	OC[C@@H]1O[C@@H]([C@H]([C@@H]1O)O)n1cnc2c1ncnc2N	C10H13N5O4	267.24	19	9	0.5	2	7	4	62.67	139.54	0.86	-1.05	-2.3	-2.72	-2.37	-1.52	-1.05	23.6	0.0883	Very soluble	-1.39	10.8	0.0406	Very soluble	0.41	685	2.56	Soluble	Low	No	No	No	No	No	No	No	-8.68	0	1	0	1	0	0.55	0	0	0	3.86
ZINC2126310	O[C@H]1[C@H](O)[C@H](O[C@H]1n1cnc2c1ncnc2N)COP(=O)([O-])[O-]	C10H12N5O7P--	345.21	23	9	0.5	4	10	3	70.52	201.54	-0.38	-3.52	-1.3	-3.47	-3.53	-2.44	0.21	562	1.63	Highly soluble	-0.13	255	0.74	Very soluble	1.26	6340	18.4	Soluble	Low	No	No	No	No	No	No	No	-10.9	1	1	1	1	2	0.11	0	1	0	4.28
ZINC2169824	[O-]C(=O)CCCC[C@H]1SC[C@@H]2[C@@H]1NC(=O)N2	C10H15N2O3S-	243.3	16	0	0.8	5	3	2	67.4	106.56	1.22	0.33	-1.3	0.74	0.66	0.33	-1.23	14.4	0.0594	Very soluble	-2.13	1.8	0.00739	Soluble	-1.67	5.18	0.0213	Soluble	High	No	No	No	No	No	No	No	-7.55	0	1	0	0	0	0.56	0	1	1	3.35
ZINC2510048	C[NH+](CCN(c1cccc[nH+]1)Cc1cccs1)C	C14H21N3S++	263.4	18	11	0.36	6	0	2	80.28	50.06	2.92	2.87	0.56	-1.83	2.92	1.49	-3.34	0.121	0.00046	Soluble	-3.58	0.0692	0.000263	Soluble	-4.48	0.0088	3.34e-05	Moderately soluble	High	Yes	No	No	No	No	No	No	-5.87	0	0	0	0	0	0.55	0	0	0	2.61
ZINC2530725	OC[C@@H]([C@@H]([C@H]([C@H](CO)O)O)O)O	C6H14O6	182.17	12	0	1	5	6	6	37.93	121.38	0.44	-3.1	-3.59	-2.77	-1.91	-2.19	1.31	3750	20.6	Highly soluble	1.12	2380	13.1	Highly soluble	2.57	67100	368	Soluble	Low	No	No	No	No	No	No	No	-9.61	1	2	0	0	3	0.55	0	0	1	3.3
ZINC2539629	C[NH2+]C[C@H]([C@H]([C@@H]([C@@H](CO)O)O)O)O	C7H18NO5+	196.22	13	0	1	6	5	6	45.63	117.76	1.07	-2.85	-4.38	-6.1	-1.72	-2.8	1.13	2680	13.6	Highly soluble	0.93	1680	8.58	Highly soluble	1.55	6930	35.3	Soluble	Low	No	No	No	No	No	No	No	-9.52	1	1	0	0	3	0.55	0	0	1	3.17
ZINC2545102	OC[C@@H]1O[C@H](C[C@H]1O)n1cc(C)c(=O)[nH]c1=O	C10H14N2O5	242.23	17	6	0.6	2	5	3	58.07	104.55	1.12	-1.17	-1.84	-1.15	-0.04	-0.61	-0.73	44.7	0.185	Very soluble	-0.53	71.1	0.293	Very soluble	-0.45	86.3	0.356	Soluble	High	No	No	No	No	No	No	No	-8.61	0	1	0	0	0	0.55	0	0	1	3.64
ZINC2548423	[O-]C(=O)[C@@H]1N2C(=O)C[C@@H]2S(=O)(=O)C1(C)C	C8H10NO5S-	232.23	15	0	0.75	1	5	0	52.18	102.96	0.41	-1.01	-1.43	-0.11	-0.94	-0.61	-0.58	61.4	0.265	Very soluble	-0.67	50.2	0.216	Very soluble	-0.1	187	0.804	Soluble	High	No	No	No	No	No	No	No	-8.43	0	1	0	0	0	0.56	0	0	1	3.81
ZINC2570830	Brc1cc2c(s1)n1c(CN=C2c2ccccc2Cl)nnc1C	C15H10BrClN4S	393.69	22	16	0.13	1	3	0	96.23	71.31	2.82	2.79	3.87	3.35	5.48	3.66	-4.51	0.0121	3.08e-05	Moderately soluble	-3.94	0.0448	0.000114	Soluble	-6.71	7.71e-05	1.96e-07	Poorly soluble	High	Yes	Yes	Yes	Yes	Yes	No	No	-6.72	0	0	0	0	0	0.55	0	0	1	3.4
ZINC2574862	Fc1cc2[C@@]3(CCOc2cc1)NC(=O)NC3=O	C11H9FN2O3	236.2	17	6	0.27	0	4	2	62.16	67.43	1.36	0.78	0.19	1.03	1.55	0.98	-2.06	2.07	0.00877	Soluble	-1.78	3.95	0.0167	Very soluble	-3.67	0.0499	0.000211	Soluble	High	No	Yes	No	No	No	No	No	-7.19	0	0	0	0	0	0.55	0	1	1	3.27
ZINC2598638	CCOC(=O)[C@H]([NH2+][C@H](C(=O)N1Cc2ccccc2C[C@@H]1C(=O)[O-])C)CCc1ccccc1	C25H30N2O5	438.52	32	12	0.4	11	5	1	123.81	103.35	3.43	1.24	-0.33	-1.52	3.39	1.24	-2.89	0.563	0.00128	Soluble	-3.01	0.43	0.000981	Soluble	-5.89	0.00057	1.3e-06	Moderately soluble	High	No	Yes	No	No	No	No	No	-8.09	0	0	1	0	0	0.55	0	0	2	4.13
ZINC3097990	O=C([C@H](c1ccccc1)NC(=O)N1CCNC1=O)N[C@@H]1C(=O)N2[C@H]1SC([C@H]2C(=O)[O-])(C)C	C20H22N5O6S-	460.48	32	6	0.45	8	6	3	122.54	176.28	0.62	0.07	-2.71	0.87	-0.99	-0.43	-2.35	2.06	0.00447	Soluble	-3.33	0.218	0.000472	Soluble	-2.58	1.21	0.00263	Soluble	Low	No	No	No	No	No	No	No	-9.06	1	1	1	1	1	0.11	0	0	2	4.64
ZINC3137566	CCC1(C(=O)NC(=O)NC1=O)c1ccccc1	C12H12N2O3	232.24	17	6	0.25	2	3	2	67.63	75.27	1.06	1.47	-0.06	0.96	1.61	1.01	-2.34	1.07	0.00462	Soluble	-2.66	0.511	0.0022	Soluble	-4.06	0.02	8.63e-05	Moderately soluble	High	No	No	No	No	No	No	No	-6.67	0	0	0	0	0	0.55	0	1	1	1.74
ZINC3201876	OC[C@H]1O[C@@H]([C@H]([C@@H]1O)O)n1cnc2c1ncnc2N	C10H13N5O4	267.24	19	9	0.5	2	7	4	62.67	139.54	0.08	-1.05	-2.3	-2.72	-2.37	-1.67	-1.05	23.6	0.0883	Very soluble	-1.39	10.8	0.0406	Very soluble	0.41	685	2.56	Soluble	Low	No	No	No	No	No	No	No	-8.68	0	1	0	1	0	0.55	0	0	0	3.86
ZINC3201891	O[C@H]1[C@H](O)[C@@H](O[C@H]1n1cnc2c1ncnc2N)COP(=O)([O-])[O-]	C10H12N5O7P--	345.21	23	9	0.5	4	10	3	70.52	201.54	-0.11	-3.52	-1.3	-3.47	-3.53	-2.39	0.21	562	1.63	Highly soluble	-0.13	255	0.74	Very soluble	1.26	6340	18.4	Soluble	Low	No	No	No	No	No	No	No	-10.9	1	1	1	1	2	0.11	0	1	0	4.28
ZINC3201893	O[C@H]1[C@H](O)[C@@H](O[C@@H]1n1cnc2c1ncnc2N)COP(=O)([O-])[O-]	C10H12N5O7P--	345.21	23	9	0.5	4	10	3	70.52	201.54	0.67	-3.52	-1.3	-3.47	-3.53	-2.23	0.21	562	1.63	Highly soluble	-0.13	255	0.74	Very soluble	1.26	6340	18.4	Soluble	Low	No	No	No	No	No	No	No	-10.9	1	1	1	1	2	0.11	0	1	0	4.28
ZINC3201958	C[C@@H]([NH2+][C@@H]([C@@H](c1ccc(cc1)O)O)C)COc1ccccc1	C18H24NO3+	302.39	22	12	0.33	7	3	3	88.7	66.3	3.09	2.82	1.52	-1.48	2.86	1.76	-3.43	0.112	0.000369	Soluble	-3.87	0.0408	0.000135	Soluble	-4.87	0.00408	1.35e-05	Moderately soluble	High	Yes	Yes	No	No	No	No	No	-6.14	0	0	0	0	0	0.55	0	0	0	3.07
ZINC3604143	[NH3+][C@H](c1ccc(cc1)O)C(=O)N[C@@H]1C(=O)N2[C@H]1SC([C@H]2C(=O)[O-])(C)C	C16H19N3O5S	365.4	25	6	0.44	5	5	3	93.9	162.71	1.5	-1.99	-2.73	-3.45	-0.45	-1.43	-0.7	73	0.2	Very soluble	-0.9	45.7	0.125	Very soluble	-1.62	8.67	0.0237	Soluble	Low	No	No	No	No	No	No	No	-9.94	0	1	1	1	1	0.55	0	0	1	4.17
ZINC3633221	CCN(C(=S)S)CC	C5H11NS2	149.28	8	0	0.8	3	0	0	44.77	74.13	2.13	1.64	1.54	1.01	1.64	1.59	-1.6	3.74	0.0251	Very soluble	-2.81	0.231	0.00155	Soluble	-1.04	13.5	0.0904	Soluble	High	No	No	No	No	No	No	No	-6.05	0	2	0	0	1	0.55	0	2	1	1.7
ZINC3641270	C1ONC(=O)[C@@H]1[NH3+]	C3H7N2O2+	103.1	7	0	0.67	0	2	2	26.39	65.97	0.48	-1.51	-2.72	-5.37	-0.44	-1.91	0.47	306	2.97	Highly soluble	0.63	440	4.27	Highly soluble	0.27	194	1.88	Soluble	Low	No	No	No	No	No	No	No	-8	0	4	0	0	2	0.55	0	0	1	2.76
ZINC3647770	Clc1cc2N[C@H](CC3CCCC3)NS(=O)(=O)c2cc1S(=O)(=O)N	C13H18ClN3O4S2	379.88	23	6	0.54	3	6	3	94.3	135.12	1.36	1.27	2.81	0.87	0.22	1.3	-2.99	0.388	0.00102	Soluble	-3.71	0.0747	0.000197	Soluble	-4.15	0.0268	7.06e-05	Moderately soluble	High	No	Yes	No	No	No	No	No	-7.72	0	0	0	1	0	0.55	0	0	1	3.81
ZINC3775575	O=Cc1c(O)c(O)c(c2c1c(O)c(c(c2)C)c1c(C)cc2c(c1O)c(C=O)c(c(c2C(C)C)O)O)C(C)C	C30H30O8	518.55	38	20	0.27	5	8	6	148.89	155.52	3.36	6.93	6.38	2.05	6.5	5.04	-7.48	1.72e-05	3.31e-08	Poorly soluble	-10.01	5.09e-08	9.81e-11	Insoluble	-6.93	6.02e-05	1.16e-07	Poorly soluble	Low	No	No	No	Yes	Yes	No	No	-4.54	2	3	1	2	3	0.17	1	2	2	3.55
ZINC3781867	[O-]C(=O)[C@@H]1N2C(=O)C[C@H]2S(=O)(=O)[C@]1(C)Cn1ccnn1	C10H11N4O5S-	299.28	20	5	0.6	3	7	0	66.55	133.67	0.03	-1.98	-2.16	-0.44	-2	-1.31	-0.44	110	0.367	Very soluble	-0.3	149	0.497	Very soluble	-0.25	168	0.56	Soluble	Low	No	No	No	No	No	No	No	-9.53	0	1	0	1	0	0.56	0	0	0	4.2
ZINC3796581	C[NH2+][C@@]1(C)[C@@H]2CC[C@H](C1(C)C)C2	C11H22N+	168.3	12	0	1	1	0	1	54.6	16.61	2.7	2.55	1.39	-0.94	2.44	1.63	-2.42	0.634	0.00377	Soluble	-2.55	0.479	0.00284	Soluble	-2.93	0.199	0.00118	Soluble	High	Yes	No	No	No	No	No	No	-5.52	0	0	0	0	2	0.55	0	0	1	3.2
ZINC3812872	COCCOC(=O)C1C(=NC(=C([C@H]1c1cccc(c1)[N+](=O)[O-])C(=O)OC(C)C)C)C	C21H26N2O7	418.44	30	6	0.48	10	8	0	115.61	120.01	2.93	2.52	2.8	0.97	2.2	2.28	-3.51	0.129	0.000309	Soluble	-4.69	0.00861	2.06e-05	Moderately soluble	-4.53	0.0124	2.97e-05	Moderately soluble	High	No	No	Yes	Yes	Yes	Yes	Yes	-7.06	0	0	0	0	0	0.55	0	3	2	4.87
ZINC3812876	O[C@H](C[NH2+]C(C)(C)C)COc1cccc2c1CCCC2=O	C17H26NO3+	292.39	21	6	0.59	6	3	2	84.89	63.14	3.08	2.4	1.31	-2.21	3.32	1.58	-2.98	0.306	0.00105	Soluble	-3.37	0.125	0.000429	Soluble	-4.67	0.00619	2.12e-05	Moderately soluble	High	Yes	No	No	No	No	No	No	-6.38	0	0	0	0	0	0.55	0	0	0	3.28
ZINC3812918	CC(COC[C@H]([NH+]1CCCC1)CN(c1ccccc1)Cc1ccccc1)C	C24H35N2O+	367.55	27	12	0.5	10	1	1	119.95	16.91	4.11	5.31	2.88	0.04	4.73	3.41	-5.13	0.00271	7.36e-06	Moderately soluble	-5.42	0.00141	3.83e-06	Moderately soluble	-6.88	4.9e-05	1.33e-07	Poorly soluble	High	Yes	No	No	No	No	No	No	-4.77	0	0	0	0	1	0.55	0	0	3	3.38
ZINC3812930	[O-]C(=O)c1cc(N2CCCC2)c(c(c1)S(=O)(=O)N)Oc1ccccc1	C17H17N2O5S-	361.39	25	12	0.24	5	6	1	93.61	121.14	1.76	3.92	1.79	1.33	0.88	1.93	-4.58	0.00961	2.66e-05	Moderately soluble	-6.16	0.000248	6.87e-07	Poorly soluble	-3.99	0.0368	0.000102	Soluble	High	No	No	No	Yes	Yes	No	No	-5.72	0	0	0	0	0	0.56	0	0	2	2.98
ZINC3813069	CCN(C(=O)Nc1ccc(c(c1)C(=O)C)OC[C@@H](C[NH2+]C(C)(C)C)O)CC	C20H34N3O4+	380.5	27	6	0.6	12	4	3	109.25	95.48	3.39	1.92	1.67	-2.16	2.42	1.45	-2.78	0.63	0.00166	Soluble	-3.55	0.108	0.000283	Soluble	-4.88	0.00503	1.32e-05	Moderately soluble	High	No	Yes	No	No	No	No	No	-7.26	0	0	1	0	0	0.55	0	0	2	3.7
ZINC3813087	COc1ccc(cc1)C[C@H]([NH+](CCCCOC(=O)c1ccc(c(c1)OC)OC)CC)C	C25H36NO5+	430.56	31	12	0.48	14	5	1	124.29	58.43	5.07	5.2	3.19	-0.32	5.27	3.68	-5.15	0.00306	7.11e-06	Moderately soluble	-6.17	0.000288	6.69e-07	Poorly soluble	-7.47	1.46e-05	3.39e-08	Poorly soluble	High	Yes	Yes	No	No	No	No	No	-5.23	0	0	1	0	1	0.55	0	0	3	4.08
ZINC3814419	C#C[C@]1(O)CC[C@@H]2[C@]1(C)CC[C@H]1[C@H]2CCC2=C1CCC(=O)C2	C20H26O2	298.42	22	0	0.75	0	2	1	88.63	37.3	3	2.11	3.72	3.73	4.18	3.35	-3.02	0.285	0.000956	Soluble	-2.52	0.893	0.00299	Soluble	-3.62	0.0708	0.000237	Soluble	High	Yes	Yes	No	No	Yes	No	No	-6.62	0	0	0	0	0	0.55	0	2	0	5.14
ZINC3830180	O[C@@H]1[C@H](O)[C@@H](O[C@@H]1n1cnc2c1ncnc2N)COP(=O)([O-])[O-]	C10H12N5O7P--	345.21	23	9	0.5	4	10	3	70.52	201.54	-1.52	-3.52	-1.3	-3.47	-3.53	-2.67	0.21	562	1.63	Highly soluble	-0.13	255	0.74	Very soluble	1.26	6340	18.4	Soluble	Low	No	No	No	No	No	No	No	-10.9	1	1	1	1	2	0.11	0	1	0	4.28
ZINC3830182	OCC(=O)[C@H]1CC[C@H]2[C@@]1(C=O)C[C@@H](O)[C@H]1[C@H]2CCC2=CC(=O)CC[C@@]12C	C21H28O5	360.44	26	0	0.76	3	5	2	96.53	91.67	2.24	1.08	1.85	1.3	2.67	1.83	-2.56	0.999	0.00277	Soluble	-2.6	0.912	0.00253	Soluble	-2.55	1.01	0.00281	Soluble	High	No	Yes	No	No	No	No	No	-7.73	0	0	0	0	0	0.55	0	1	1	5.03
ZINC3830183	OCC(=O)[C@H]1CC[C@H]2[C@@]1(C=O)C[C@@H](O)[C@H]1[C@H]2CCC2=CC(=O)CC[C@]12C	C21H28O5	360.44	26	0	0.76	3	5	2	96.53	91.67	2.01	1.08	1.85	1.3	2.67	1.78	-2.56	0.999	0.00277	Soluble	-2.6	0.912	0.00253	Soluble	-2.55	1.01	0.00281	Soluble	High	No	Yes	No	No	No	No	No	-7.73	0	0	0	0	0	0.55	0	1	1	5.03
ZINC3830185	OCC(=O)[C@H]1CC[C@H]2[C@@]1(C=O)C[C@@H](O)[C@H]1[C@@H]2CCC2=CC(=O)CC[C@]12C	C21H28O5	360.44	26	0	0.76	3	5	2	96.53	91.67	2.03	1.08	1.85	1.3	2.67	1.78	-2.56	0.999	0.00277	Soluble	-2.6	0.912	0.00253	Soluble	-2.55	1.01	0.00281	Soluble	High	No	Yes	No	No	No	No	No	-7.73	0	0	0	0	0	0.55	0	1	1	5.03
ZINC3830196	O[C@H]1CC[C@]2([C@H](C1)CC[C@H]1[C@H]2C(=O)C[C@]2([C@H]1CC[C@H]2C(=O)C)C)C	C21H32O3	332.48	24	0	0.9	1	3	1	95.65	54.37	2.79	3.28	3.77	3.17	3.6	3.32	-3.9	0.0417	0.000125	Soluble	-4.1	0.0266	8.01e-05	Moderately soluble	-3.58	0.0864	0.00026	Soluble	High	Yes	No	No	No	No	No	No	-6	0	0	0	0	0	0.55	0	0	0	4.25
ZINC3830198	O[C@H]1CC[C@]2([C@H](C1)CC[C@H]1[C@H]2C(=O)C[C@]2([C@@H]1CC[C@H]2C(=O)C)C)C	C21H32O3	332.48	24	0	0.9	1	3	1	95.65	54.37	2.82	3.28	3.77	3.17	3.6	3.33	-3.9	0.0417	0.000125	Soluble	-4.1	0.0266	8.01e-05	Moderately soluble	-3.58	0.0864	0.00026	Soluble	High	Yes	No	No	No	No	No	No	-6	0	0	0	0	0	0.55	0	0	0	4.25
ZINC3830199	O[C@H]1CC[C@]2([C@H](C1)CC[C@H]1[C@H]2C(=O)C[C@]2([C@@H]1CC[C@@H]2C(=O)C)C)C	C21H32O3	332.48	24	0	0.9	1	3	1	95.65	54.37	2.84	3.28	3.77	3.17	3.6	3.33	-3.9	0.0417	0.000125	Soluble	-4.1	0.0266	8.01e-05	Moderately soluble	-3.58	0.0864	0.00026	Soluble	High	Yes	No	No	No	No	No	No	-6	0	0	0	0	0	0.55	0	0	0	4.25
ZINC3830204	[O-]C(=O)[C@@H]1N2C(=O)[C@H]([C@@H]2SC1(C)C)/[NH+]=C/N1CCCCCC1	C15H23N3O3S	325.43	22	0	0.8	3	3	1	93.51	102.95	2.32	2.14	-2.61	1.97	1.12	0.99	-3.01	0.32	0.000982	Soluble	-3.93	0.0379	0.000116	Soluble	-1.11	25	0.0767	Soluble	Low	No	No	No	No	No	No	No	-6.77	0	1	0	0	0	0.55	0	2	0	4.53
ZINC3830206	[O-]C(=O)[C@@H]1N2C(=O)[C@H]([C@H]2SC1(C)C)/[NH+]=C/N1CCCCCC1	C15H23N3O3S	325.43	22	0	0.8	3	3	1	93.51	102.95	2.14	2.14	-2.61	1.97	1.12	0.95	-3.01	0.32	0.000982	Soluble	-3.93	0.0379	0.000116	Soluble	-1.11	25	0.0767	Soluble	Low	No	No	No	No	No	No	No	-6.77	0	1	0	0	0	0.55	0	2	0	4.53
ZINC3830217	[NH3+][C@H](c1ccccc1)C(=O)N[C@@H]1C(=O)N2[C@H]1SC([C@@H]2C(=O)[O-])(C)C	C16H19N3O4S	349.4	24	6	0.44	5	4	2	91.88	142.48	1.72	-1.13	-2.44	-2.93	0.01	-0.95	-1.15	24.8	0.0709	Very soluble	-1.37	14.9	0.0426	Very soluble	-2.21	2.15	0.00615	Soluble	Low	No	No	No	No	No	No	No	-9.23	0	1	1	1	0	0.55	0	0	0	4.16
ZINC3830219	[NH3+][C@H](c1ccccc1)C(=O)N[C@@H]1C(=O)N2[C@@H]1SC([C@H]2C(=O)[O-])(C)C	C16H19N3O4S	349.4	24	6	0.44	5	4	2	91.88	142.48	1.53	-1.13	-2.44	-2.93	0.01	-0.99	-1.15	24.8	0.0709	Very soluble	-1.37	14.9	0.0426	Very soluble	-2.21	2.15	0.00615	Soluble	Low	No	No	No	No	No	No	No	-9.23	0	1	1	1	0	0.55	0	0	0	4.16
ZINC3830221	OC[C@H]1O[C@H]2[C@H]([C@H]1O)Oc1n2ccc(=N)n1	C9H11N3O4	225.2	16	6	0.56	1	6	3	50.11	100.59	1.05	-2.37	-1.95	-1.5	-1.11	-1.18	0.05	250	1.11	Highly soluble	0.8	1410	6.25	Highly soluble	0.2	355	1.58	Soluble	High	No	No	No	No	No	No	No	-9.36	0	1	0	0	1	0.55	0	0	1	4.04
ZINC3830222	OC[C@H]1O[C@H]2[C@@H]([C@H]1O)Oc1n2ccc(=N)n1	C9H11N3O4	225.2	16	6	0.56	1	6	3	50.11	100.59	1.1	-2.37	-1.95	-1.5	-1.11	-1.17	0.05	250	1.11	Highly soluble	0.8	1410	6.25	Highly soluble	0.2	355	1.58	Soluble	High	No	No	No	No	No	No	No	-9.36	0	1	0	0	1	0.55	0	0	1	4.04
ZINC3830224	O[C@H]1CC[C@]2(C(=CC[C@H]3[C@H]2CC[C@]2([C@H]3CC[C@@H]2O)C)C1)C	C19H30O2	290.44	21	0	0.89	0	2	2	86.32	40.46	3.05	3.55	3.67	3.7	2.99	3.39	-3.88	0.0385	0.000133	Soluble	-4.08	0.0239	8.23e-05	Moderately soluble	-2.79	0.472	0.00163	Soluble	High	Yes	Yes	No	No	No	No	No	-5.55	0	0	0	0	0	0.55	0	1	1	5.01
ZINC3830246	CC[NH+](CCC[C@H](Nc1c2cc(OC)ccc2[nH+]c2c1ccc(c2)Cl)C)CC	C23H32ClN3O++	401.97	28	14	0.43	9	1	3	123.56	39.84	4.76	6.03	3.78	0.1	5.52	4.04	-5.91	0.000498	1.24e-06	Moderately soluble	-6.65	9.1e-05	2.26e-07	Poorly soluble	-8.66	8.71e-07	2.17e-09	Poorly soluble	High	Yes	No	Yes	No	No	No	No	-4.47	0	0	0	0	1	0.55	1	1	3	3.27
ZINC3830252	OC[C@@H]1O[C@@H]([C@H]([C@@H]1O)O)n1cnc(nc1=O)N	C8H12N4O5	244.2	17	6	0.62	2	7	4	53.64	143.72	0.62	-2.17	-3.48	-2.98	-2.72	-2.15	-0.12	187	0.765	Very soluble	-0.32	118	0.481	Very soluble	1.38	5900	24.2	Soluble	Low	No	No	No	No	No	No	No	-9.33	0	1	1	1	1	0.55	0	0	1	3.77
ZINC3830254	CC(=O)O[C@H]1[C@@H](OC(=O)C)[C@H](O[C@H]1n1ncc(=O)[nH]c1=O)COC(=O)C	C14H17N3O9	371.3	26	6	0.57	8	10	1	81.28	155.88	1.89	-0.2	-2.07	-0.48	-0.6	-0.29	-1.66	8.15	0.0219	Very soluble	-2.62	0.897	0.00241	Soluble	-0.78	62	0.167	Soluble	Low	No	No	No	No	No	No	No	-8.71	1	1	1	1	1	0.55	0	1	2	4.48
ZINC3830255	CC(=O)O[C@H]1[C@@H](OC(=O)C)[C@@H](O[C@H]1n1ncc(=O)[nH]c1=O)COC(=O)C	C14H17N3O9	371.3	26	6	0.57	8	10	1	81.28	155.88	1.58	-0.2	-2.07	-0.48	-0.6	-0.35	-1.66	8.15	0.0219	Very soluble	-2.62	0.897	0.00241	Soluble	-0.78	62	0.167	Soluble	Low	No	No	No	No	No	No	No	-8.71	1	1	1	1	1	0.55	0	1	2	4.48
ZINC3830256	CC(=O)O[C@H]1[C@H](OC(=O)C)[C@H](O[C@H]1n1ncc(=O)[nH]c1=O)COC(=O)C	C14H17N3O9	371.3	26	6	0.57	8	10	1	81.28	155.88	2.12	-0.2	-2.07	-0.48	-0.6	-0.25	-1.66	8.15	0.0219	Very soluble	-2.62	0.897	0.00241	Soluble	-0.78	62	0.167	Soluble	Low	No	No	No	No	No	No	No	-8.71	1	1	1	1	1	0.55	0	1	2	4.48
ZINC3830257	CC(=O)O[C@H]1[C@H](OC(=O)C)[C@@H](O[C@H]1n1ncc(=O)[nH]c1=O)COC(=O)C	C14H17N3O9	371.3	26	6	0.57	8	10	1	81.28	155.88	1.8	-0.2	-2.07	-0.48	-0.6	-0.31	-1.66	8.15	0.0219	Very soluble	-2.62	0.897	0.00241	Soluble	-0.78	62	0.167	Soluble	Low	No	No	No	No	No	No	No	-8.71	1	1	1	1	1	0.55	0	1	2	4.48
ZINC3830261	O=C([C@@H](c1ccccc1)NC(=O)N1CCNC1=O)N[C@@H]1C(=O)N2[C@@H]1SC([C@@H]2C(=O)[O-])(C)C	C20H22N5O6S-	460.48	32	6	0.45	8	6	3	122.54	176.28	0.65	0.07	-2.71	0.87	-0.99	-0.42	-2.35	2.06	0.00447	Soluble	-3.33	0.218	0.000472	Soluble	-2.58	1.21	0.00263	Soluble	Low	No	No	No	No	No	No	No	-9.06	1	1	1	1	1	0.11	0	0	2	4.64
ZINC3830274	OC[C@@H](C(=O)NNCc1ccc(c(c1O)O)O)[NH3+]	C10H16N3O5+	258.25	18	6	0.3	6	6	7	62.83	149.69	-2	-1.27	-2.62	-5.15	-1.64	-2.54	-0.49	83.2	0.322	Very soluble	-1.38	10.8	0.042	Very soluble	-0.65	57.4	0.222	Soluble	Low	No	No	No	No	No	No	No	-8.78	1	1	1	1	1	0.55	2	1	0	2.75
ZINC3830280	CCN(C(=O)[C@H]1C[NH+]2CCc3c([C@@H]2C[C@@H]1OC(=O)C)cc(c(c3)OC)OC)CC	C22H33N2O5+	405.51	29	6	0.64	8	5	1	114.97	69.51	3.61	2.06	0.3	-2.11	2.35	1.24	-3.28	0.214	0.000528	Soluble	-3.15	0.288	0.00071	Soluble	-4.1	0.0322	7.94e-05	Moderately soluble	High	No	No	No	No	No	No	No	-7.31	0	0	0	0	0	0.55	0	0	2	4.42
ZINC3830283	CC(COC[C@@H]([NH+]1CCCC1)CN(c1ccccc1)Cc1ccccc1)C	C24H35N2O+	367.55	27	12	0.5	10	1	1	119.95	16.91	4.27	5.31	2.88	0.04	4.73	3.45	-5.13	0.00271	7.36e-06	Moderately soluble	-5.42	0.00141	3.83e-06	Moderately soluble	-6.88	4.9e-05	1.33e-07	Poorly soluble	High	Yes	No	No	No	No	No	No	-4.77	0	0	0	0	1	0.55	0	0	3	3.38
ZINC3830287	OCC(=O)[C@]1(O)[C@H](C)C[C@@H]2[C@]1(C)C[C@@H](O)[C@@]1([C@H]2CCC2=CC(=O)C=C[C@]12C)F	C22H29FO5	392.46	28	0	0.73	2	6	3	101.96	94.83	2.09	1.94	2.32	1.62	2.58	2.11	-3.36	0.17	0.000433	Soluble	-3.56	0.109	0.000278	Soluble	-2.8	0.625	0.00159	Soluble	High	No	Yes	No	No	No	No	No	-7.32	0	0	0	0	0	0.55	0	0	1	5.47
ZINC3830306	CCC(=O)O[C@@]1([C@H](C)C[C@@H]2[C@]1(C)C[C@H](O)[C@@]1([C@@H]2CCC2=CC(=O)C=C[C@]12C)F)C(=O)COC(=O)CC	C28H37FO7	504.59	36	0	0.71	8	8	1	131.04	106.97	3.27	4.07	4.24	2.7	4.43	3.74	-5	0.00499	9.9e-06	Moderately soluble	-6.02	0.000481	9.53e-07	Poorly soluble	-4.8	0.00803	1.59e-05	Moderately soluble	High	No	Yes	No	No	No	No	Yes	-6.49	1	3	0	0	0	0.55	0	1	3	5.97
ZINC3830334	CCC[C@@H]1O[C@H]2[C@](O1)(C(=O)CO)[C@@]1([C@H](C2)[C@@H]2CCC3=CC(=O)C=C[C@@]3([C@@H]2[C@@H](C1)O)C)C	C25H34O6	430.53	31	0	0.76	4	6	2	115.18	93.06	3.03	2.55	2.72	1.74	2.91	2.59	-3.85	0.0606	0.000141	Soluble	-4.15	0.0304	7.05e-05	Moderately soluble	-3.17	0.29	0.000673	Soluble	High	No	Yes	No	No	No	No	No	-7.12	0	0	0	0	0	0.55	0	0	1	6.09
ZINC3830335	CCC[C@H]1O[C@H]2[C@](O1)(C(=O)CO)[C@@]1([C@H](C2)[C@@H]2CCC3=CC(=O)C=C[C@@]3([C@@H]2[C@@H](C1)O)C)C	C25H34O6	430.53	31	0	0.76	4	6	2	115.18	93.06	2.96	2.55	2.72	1.74	2.91	2.58	-3.85	0.0606	0.000141	Soluble	-4.15	0.0304	7.05e-05	Moderately soluble	-3.17	0.29	0.000673	Soluble	High	No	Yes	No	No	No	No	No	-7.12	0	0	0	0	0	0.55	0	0	1	6.09
ZINC3830337	CCC[C@H]1O[C@@H]2[C@](O1)(C(=O)CO)[C@@]1([C@H](C2)[C@@H]2CCC3=CC(=O)C=C[C@@]3([C@@H]2[C@@H](C1)O)C)C	C25H34O6	430.53	31	0	0.76	4	6	2	115.18	93.06	3.3	2.55	2.72	1.74	2.91	2.64	-3.85	0.0606	0.000141	Soluble	-4.15	0.0304	7.05e-05	Moderately soluble	-3.17	0.29	0.000673	Soluble	High	No	Yes	No	No	No	No	No	-7.12	0	0	0	0	0	0.55	0	0	1	6.09
ZINC3830383	[NH3+][C@@H]1C[C@@H](O[C@@H]([C@@H]1O)C)O[C@@H]1C[C@@](O)(Cc2c1c(O)c1c(c2O)C(=O)c2c(C1=O)c(O)ccc2)C(=O)C	C26H28NO10+	514.5	37	12	0.42	3	10	6	128.29	198.46	2.46	1.5	-0.32	-5.23	1.22	-0.07	-4.02	0.0495	9.62e-05	Moderately soluble	-5.28	0.00273	5.3e-06	Moderately soluble	-3.35	0.228	0.000444	Soluble	Low	No	Yes	No	No	No	No	No	-8.37	3	1	1	1	2	0.17	1	1	1	5.71
ZINC3830385	[NH3+][C@@H]1C[C@@H](O[C@@H]([C@H]1O)C)O[C@@H]1C[C@@](O)(Cc2c1c(O)c1c(c2O)C(=O)c2c(C1=O)c(O)ccc2)C(=O)C	C26H28NO10+	514.5	37	12	0.42	3	10	6	128.29	198.46	2.47	1.5	-0.32	-5.23	1.22	-0.07	-4.02	0.0495	9.62e-05	Moderately soluble	-5.28	0.00273	5.3e-06	Moderately soluble	-3.35	0.228	0.000444	Soluble	Low	No	Yes	No	No	No	No	No	-8.37	3	1	1	1	2	0.17	1	1	1	5.71
ZINC3830394	O[C@@H](C(=O)N[C@@H]1C(=O)N2[C@@H]1SCC(=C2C(=O)[O-])CSc1nnnn1C)c1ccccc1	C18H17N6O5S2-	461.49	31	11	0.33	8	8	2	112.44	203.97	1.84	0.5	-2.27	0.97	-0.72	0.06	-2.75	0.819	0.00177	Soluble	-4.35	0.0205	4.43e-05	Moderately soluble	-2.3	2.31	0.00501	Soluble	Low	No	No	No	No	No	No	No	-8.76	1	1	1	1	1	0.11	0	0	2	4.81
ZINC3830396	O[C@@H](C(=O)N[C@H]1C(=O)N2[C@@H]1SCC(=C2C(=O)[O-])CSc1nnnn1C)c1ccccc1	C18H17N6O5S2-	461.49	31	11	0.33	8	8	2	112.44	203.97	1.72	0.5	-2.27	0.97	-0.72	0.04	-2.75	0.819	0.00177	Soluble	-4.35	0.0205	4.43e-05	Moderately soluble	-2.3	2.31	0.00501	Soluble	Low	No	No	No	No	No	No	No	-8.76	1	1	1	1	1	0.11	0	0	2	4.81
ZINC3830399	O=CO[C@@H](C(=O)N[C@H]1C(=O)N2[C@@H]1SCC(=C2C(=O)[O-])CSc1nnnn1C)c1ccccc1	C19H17N6O6S2-	489.5	33	11	0.32	10	9	1	117.76	210.04	1.96	1.09	-2.08	1.19	-0.47	0.34	-3.15	0.348	0.000711	Soluble	-5.09	0.00395	8.07e-06	Moderately soluble	-2.53	1.43	0.00292	Soluble	Low	No	No	No	No	No	No	Yes	-8.51	1	2	1	1	1	0.11	0	1	2	4.85
ZINC3830400	O=CO[C@@H](C(=O)N[C@H]1C(=O)N2[C@H]1SCC(=C2C(=O)[O-])CSc1nnnn1C)c1ccccc1	C19H17N6O6S2-	489.5	33	11	0.32	10	9	1	117.76	210.04	2.16	1.09	-2.08	1.19	-0.47	0.38	-3.15	0.348	0.000711	Soluble	-5.09	0.00395	8.07e-06	Moderately soluble	-2.53	1.43	0.00292	Soluble	Low	No	No	No	No	No	No	Yes	-8.51	1	2	1	1	1	0.11	0	1	2	4.85
ZINC3830401	O=C([C@H](c1ccc(cc1)O)[NH3+])N[C@H]1C(=O)N2[C@@H]1SCC(=C2C(=O)[O-])CSc1n[nH]nc1	C18H18N6O5S2	462.5	31	11	0.28	8	7	4	114.57	229.58	0.91	-2.31	-2.72	-3.66	-0.35	-1.63	-0.99	47.7	0.103	Very soluble	-1.98	4.9	0.0106	Very soluble	-2.75	0.819	0.00177	Soluble	Low	No	No	No	No	No	No	No	-10.76	1	1	1	1	2	0.55	0	0	2	4.87
ZINC3830403	O=C([C@H](c1ccc(cc1)O)[NH3+])N[C@@H]1C(=O)N2[C@@H]1SCC(=C2C(=O)[O-])CSc1n[nH]nc1	C18H18N6O5S2	462.5	31	11	0.28	8	7	4	114.57	229.58	0.78	-2.31	-2.72	-3.66	-0.35	-1.65	-0.99	47.7	0.103	Very soluble	-1.98	4.9	0.0106	Very soluble	-2.75	0.819	0.00177	Soluble	Low	No	No	No	No	No	No	No	-10.76	1	1	1	1	2	0.55	0	0	2	4.87
ZINC3830408	O=C(N[C@H]1C(=O)N2[C@H]1SCC(=C2C(=O)[O-])CSc1nnc(s1)C)Cn1cnnn1	C14H13N8O4S3-	453.5	29	10	0.43	8	9	1	104.75	237.76	1.49	-0.58	-2.35	0.08	-0.35	-0.34	-2.01	4.4	0.00969	Soluble	-3.94	0.0518	0.000114	Soluble	-1.76	7.79	0.0172	Soluble	Low	No	No	No	No	No	No	No	-9.48	1	1	1	1	1	0.11	0	0	2	4.58
ZINC3830413	CO/N=C(\C(=O)N[C@@H]1C(=O)N2[C@@H]1SCC(=C2C(=O)[O-])CSc1nnnn1C)/c1csc(n1)N	C16H16N9O5S3-	510.55	33	10	0.38	9	10	2	120.93	272.48	1.86	0.03	-2.58	-0.31	-0.71	-0.34	-2.65	1.13	0.00222	Soluble	-5.3	0.00253	4.96e-06	Moderately soluble	-1.53	15	0.0294	Soluble	Low	No	Yes	No	No	No	No	No	-9.39	2	2	1	1	1	0.11	0	2	2	4.89
ZINC3830414	CO/N=C(/C(=O)N[C@@H]1C(=O)N2[C@H]1SCC(=C2C(=O)[O-])CSc1nnnn1C)\c1csc(n1)N	C16H16N9O5S3-	510.55	33	10	0.38	9	10	2	120.93	272.48	1.76	0.03	-2.58	-0.31	-0.71	-0.36	-2.65	1.13	0.00222	Soluble	-5.3	0.00253	4.96e-06	Moderately soluble	-1.53	15	0.0294	Soluble	Low	No	Yes	No	No	No	No	No	-9.39	2	2	1	1	1	0.11	0	2	2	4.89
ZINC3830417	N#CCSCC(=O)N[C@]1(OC)C(=O)N2[C@@H]1SCC(=C2C(=O)[O-])CSc1nnnn1C	C15H16N7O5S3-	470.53	30	5	0.53	10	9	1	109.68	242.06	0.93	-0.6	-2.44	-0.36	-0.86	-0.67	-1.84	6.76	0.0144	Very soluble	-4.01	0.0458	9.73e-05	Moderately soluble	-1.65	10.4	0.0222	Soluble	Low	No	No	No	No	No	No	No	-9.6	1	1	1	1	1	0.11	0	1	2	4.87
ZINC3830426	O=C([C@@H](c1ccccc1)O)N[C@H]1C(=O)N2[C@@H]1SCC(=C2C(=O)[O-])CSc1nnnn1CS(=O)(=O)[O-]	C18H16N6O8S3--	540.55	35	11	0.33	10	11	2	121.13	269.55	-0.11	-0.58	-2.37	0.21	-2.42	-1.06	-2.4	2.16	0.00399	Soluble	-4.61	0.0133	2.46e-05	Moderately soluble	-1.58	14.3	0.0264	Soluble	Low	No	No	No	No	No	No	No	-10.01	2	2	1	1	2	0.11	0	1	2	5.11
ZINC3830431	CCN1CCN(C(=O)C1=O)C(=O)N[C@@H](c1ccc(cc1)O)C(=O)N[C@@H]1C(=O)N2[C@@H]1SCC(=C2C(=O)[O-])CSc1nnnn1C	C25H26N9O8S2-	644.66	44	11	0.4	12	11	3	162.25	273.69	1.54	-0.74	-3.91	-0.26	-2.18	-1.11	-2.76	1.11	0.00172	Soluble	-4.53	0.019	2.95e-05	Moderately soluble	-2.43	2.42	0.00375	Soluble	Low	No	Yes	No	No	No	No	No	-10.76	2	3	2	1	3	0.11	0	1	2	5.55
ZINC3830433	[NH3+]Cc1ccccc1CC(=O)N[C@H]1C(=O)N2[C@@H]1SCC(=C2C(=O)[O-])CSc1nnnn1CC(=O)[O-]	C20H20N7O6S2-	518.55	35	11	0.35	11	9	2	124.85	251.51	1.31	-3.22	-4.63	-3.02	-0.91	-2.09	-0.53	152	0.293	Very soluble	-1.49	16.7	0.0322	Very soluble	-2.61	1.28	0.00248	Soluble	Low	No	No	No	No	No	No	No	-11.75	2	2	2	1	2	0.11	0	0	2	4.88
ZINC3830435	[NH3+]Cc1ccccc1CC(=O)N[C@H]1C(=O)N2[C@H]1SCC(=C2C(=O)[O-])CSc1nnnn1CC(=O)[O-]	C20H20N7O6S2-	518.55	35	11	0.35	11	9	2	124.85	251.51	1.22	-3.22	-4.63	-3.02	-0.91	-2.11	-0.53	152	0.293	Very soluble	-1.49	16.7	0.0322	Very soluble	-2.61	1.28	0.00248	Soluble	Low	No	No	No	No	No	No	No	-11.75	2	2	2	1	2	0.11	0	0	2	4.88
ZINC3830438	CO/N=C(\c1csc(n1)N)/C(=O)N[C@@H]1C(=O)N2[C@H]1SCC(=C2C(=O)[O-])COC(=O)C	C16H16N5O7S2-	454.46	30	5	0.38	9	9	2	107.95	229.88	2.13	-1.36	-2.33	-1	0.27	-0.46	-1.33	21.2	0.0468	Very soluble	-2.97	0.49	0.00108	Soluble	-1.39	18.6	0.041	Soluble	Low	No	No	No	No	No	No	No	-10.04	1	1	1	1	1	0.11	0	2	2	4.75
ZINC3830439	CO/N=C(\c1csc(n1)N)/C(=O)N[C@H]1C(=O)N2[C@@H]1SCC(=C2C(=O)[O-])COC(=O)C	C16H16N5O7S2-	454.46	30	5	0.38	9	9	2	107.95	229.88	1.34	-1.36	-2.33	-1	0.27	-0.62	-1.33	21.2	0.0468	Very soluble	-2.97	0.49	0.00108	Soluble	-1.39	18.6	0.041	Soluble	Low	No	No	No	No	No	No	No	-10.04	1	1	1	1	1	0.11	0	2	2	4.75
ZINC3830442	CO[C@@]1(NC(=O)C2SC(=C(C(=O)N)C(=O)[O-])S2)C(=O)N2[C@H]1SCC(=C2C(=O)[O-])CSc1nnnn1C	C17H15N7O8S4--	573.6	36	5	0.41	10	11	2	127.28	326.79	0.12	0.09	-4.45	-1.03	-2.2	-1.49	-2.9	0.729	0.00127	Soluble	-6.51	0.000178	3.11e-07	Poorly soluble	-0.06	500	0.871	Soluble	Low	No	Yes	No	No	No	No	No	-9.74	2	2	1	1	2	0.11	0	4	2	5.34
ZINC3830445	C[NH+](CCn1nnnc1SCC1=C(C(=O)[O-])N2[C@H](SC1)[C@@H](C2=O)NC(=O)Cc1csc(n1)N)C	C18H23N9O4S3	525.63	34	10	0.5	11	8	3	129.93	255.33	1.63	-2.42	-3.78	-3.5	-0.58	-1.73	-1.07	45.2	0.0859	Very soluble	-2.4	2.08	0.00396	Soluble	-2.23	3.07	0.00585	Soluble	Low	No	No	No	No	No	No	No	-11.22	2	2	2	1	2	0.17	0	0	2	5.1
ZINC3830450	CO[C@]1(NC(=O)Cc2cccs2)C(=O)N2[C@@H]1SCC(=C2C(=O)[O-])COC(=O)N	C16H16N3O7S2-	426.44	28	5	0.38	9	7	2	100.4	204.63	1.33	-0.02	-1.62	-0.08	0.52	0.03	-2.01	4.17	0.00978	Soluble	-3.83	0.0634	0.000149	Soluble	-1.93	5.01	0.0117	Soluble	Low	No	No	No	No	No	No	No	-8.92	0	1	1	1	1	0.11	0	1	2	4.62
ZINC3830466	O=C([C@@H](S(=O)(=O)[O-])c1ccccc1)N[C@@H]1C(=O)N2[C@@H]1SCC(=C2C(=O)[O-])C[n+]1ccc(cc1)C(=O)N	C22H19N4O8S2-	531.54	36	12	0.23	9	8	2	127.29	227.39	-13.26	-0.47	-1.86	0.06	-1.42	-3.39	-2.49	1.71	0.00322	Soluble	-3.84	0.0771	0.000145	Soluble	-2.77	0.892	0.00168	Soluble	Low	No	Yes	No	No	No	No	No	-9.88	2	2	1	1	1	0.11	0	2	2	5
ZINC3830473	O=C(N[C@@H]1C(=O)N2[C@@H]1SCC(=C2C(=O)[O-])CSc1nncs1)Cn1cnnn1	C13H11N8O4S3-	439.47	28	10	0.38	8	9	1	99.78	237.76	1.01	-0.67	-2.66	-0.18	-0.84	-0.67	-1.88	5.81	0.0132	Very soluble	-3.85	0.0622	0.000142	Soluble	-1.39	17.9	0.0406	Soluble	Low	No	No	No	No	No	No	No	-9.46	1	1	1	1	1	0.11	0	0	2	4.45
ZINC3830479	[O-]C(=O)C1=CCS[C@@H]2N1C(=O)[C@H]2NC(=O)/C(=N\OC)/c1csc(n1)N	C13H12N5O5S2-	382.39	25	5	0.31	6	7	2	92.25	203.58	1.26	0.05	-2.26	-0.99	-0.12	-0.41	-1.99	3.87	0.0101	Very soluble	-3.88	0.0506	0.000132	Soluble	-0.75	67.5	0.177	Soluble	Low	No	No	No	No	No	No	No	-8.6	0	1	1	1	1	0.11	0	2	1	4.41
ZINC3830485	CO/N=C(/C(=O)N[C@@H]1C(=O)N2[C@@H]1SCC(=C2C(=O)[O-])COC(=O)N)\c1ccco1	C16H15N4O8S-	423.38	29	5	0.31	9	9	2	98.43	201.89	1.76	-0.16	-2.25	-1.27	-0.97	-0.58	-1.9	5.36	0.0127	Very soluble	-3.62	0.1	0.000237	Soluble	-1.35	19	0.045	Soluble	Low	No	No	No	No	No	No	No	-9	1	1	1	1	1	0.11	0	2	2	4.71
ZINC3830487	CO/N=C(/C(=O)N[C@@H]1C(=O)N2[C@H]1SCC(=C2C(=O)[O-])COC(=O)N)\c1ccco1	C16H15N4O8S-	423.38	29	5	0.31	9	9	2	98.43	201.89	1.62	-0.16	-2.25	-1.27	-0.97	-0.61	-1.9	5.36	0.0127	Very soluble	-3.62	0.1	0.000237	Soluble	-1.35	19	0.045	Soluble	Low	No	No	No	No	No	No	No	-9	1	1	1	1	1	0.11	0	2	2	4.71
ZINC3830489	CO/N=C(\c1ccco1)/C(=O)N[C@H]1C(=O)N2[C@H]1SCC(=C2C(=O)O[C@@H](OC(=O)C)C)COC(=O)N	C20H22N4O10S	510.47	35	5	0.4	13	11	2	120.4	214.36	2.48	0.89	-0.55	-1.08	-0.26	0.29	-2.81	0.785	0.00154	Soluble	-4.98	0.00539	1.06e-05	Moderately soluble	-2.08	4.21	0.00824	Soluble	Low	No	Yes	No	No	No	No	No	-8.78	2	2	2	1	2	0.17	0	4	2	5.41
ZINC3830491	CO/N=C(\c1ccco1)/C(=O)N[C@H]1C(=O)N2[C@@H]1SCC(=C2C(=O)O[C@@H](OC(=O)C)C)COC(=O)N	C20H22N4O10S	510.47	35	5	0.4	13	11	2	120.4	214.36	2.36	0.89	-0.55	-1.08	-0.26	0.27	-2.81	0.785	0.00154	Soluble	-4.98	0.00539	1.06e-05	Moderately soluble	-2.08	4.21	0.00824	Soluble	Low	No	Yes	No	No	No	No	No	-8.78	2	2	2	1	2	0.17	0	4	2	5.41
ZINC3830509	CC(=O)OCC1=C(C(=O)[O-])N2[C@H](SC1)[C@H](C2=O)NC(=O)Cc1cccs1	C16H15N2O6S2-	395.43	26	5	0.38	8	6	1	96.18	169.38	1.7	-0.41	-1.12	0.66	1.67	0.5	-1.65	8.9	0.0225	Very soluble	-2.68	0.821	0.00208	Soluble	-2.36	1.74	0.0044	Soluble	Low	No	No	No	Yes	No	No	No	-9	0	1	1	1	1	0.11	0	0	2	4.44
ZINC3830511	O=C(N[C@@H]1C(=O)N2[C@@H]1SCC(=C2C(=O)[O-])COC(=O)C)CSc1ccncc1	C17H16N3O6S2-	422.46	28	6	0.35	9	7	1	102.85	179.33	1.62	-1.15	-1.24	0.35	0.6	0.04	-1.3	21.2	0.0502	Very soluble	-2.12	3.18	0.00752	Soluble	-2.8	0.666	0.00158	Soluble	Low	No	No	No	No	No	No	No	-9.69	0	1	1	1	1	0.11	0	0	2	4.51
ZINC3830514	O=C(N[C@H]1C(=O)N2[C@H]1SCC(=C2C(=O)[O-])COC(=O)C)CSc1ccncc1	C17H16N3O6S2-	422.46	28	6	0.35	9	7	1	102.85	179.33	1.65	-1.15	-1.24	0.35	0.6	0.04	-1.3	21.2	0.0502	Very soluble	-2.12	3.18	0.00752	Soluble	-2.8	0.666	0.00158	Soluble	Low	No	No	No	No	No	No	No	-9.69	0	1	1	1	1	0.11	0	0	2	4.51
ZINC3830515	O=C([C@@H](C1=CCC=CC1)[NH3+])N[C@@H]1C(=O)N2[C@@H]1SCC(=C2C(=O)[O-])C	C16H19N3O4S	349.4	24	0	0.44	5	4	2	92.66	142.48	1.78	0.45	-2.08	-2.93	-0.18	-0.59	-1.96	3.83	0.011	Very soluble	-3.01	0.341	0.000977	Soluble	-0.75	62.4	0.179	Soluble	Low	No	No	No	No	No	No	No	-8.11	0	1	1	1	0	0.55	0	1	0	4.84
ZINC3830519	COCc1c(c2ccc(cc2)F)c(/C=C/[C@H](C[C@@H](CC(=O)[O-])O)O)c(nc1C(C)C)C(C)C	C26H33FNO5-	458.54	33	12	0.46	11	7	2	125.93	102.71	3.58	3.58	3.71	2.4	6.18	3.89	-4.48	0.0151	3.3e-05	Moderately soluble	-5.42	0.00173	3.78e-06	Moderately soluble	-6.09	0.000376	8.2e-07	Poorly soluble	High	No	Yes	No	No	No	Yes	Yes	-6.56	0	0	1	0	0	0.56	0	0	3	4.78
ZINC3830524	OC[C@@H]([C@H]1O[C@@H]2[C@@H]([C@H]1O)O[C@H](O2)C(Cl)(Cl)Cl)O	C8H11Cl3O6	309.53	17	0	1	3	6	3	57.51	88.38	1.69	1.02	-0.46	-0.75	0.15	0.33	-2.2	1.94	0.00626	Soluble	-2.47	1.06	0.00342	Soluble	0.06	355	1.15	Soluble	High	No	No	No	No	No	No	No	-7.46	0	1	0	0	0	0.55	0	1	0	4.58
ZINC3830526	OC[C@@H]([C@@H]1O[C@@H]2[C@@H]([C@H]1O)O[C@H](O2)C(Cl)(Cl)Cl)O	C8H11Cl3O6	309.53	17	0	1	3	6	3	57.51	88.38	1.73	1.02	-0.46	-0.75	0.15	0.34	-2.2	1.94	0.00626	Soluble	-2.47	1.06	0.00342	Soluble	0.06	355	1.15	Soluble	High	No	No	No	No	No	No	No	-7.46	0	1	0	0	0	0.55	0	1	0	4.58
ZINC3830538	O=C1CC[C@@]2(C(=C1)C(=C[C@H]1[C@H]2CC[C@]2([C@H]1CC[C@]2(OC(=O)C)C(=O)C)C)Cl)C	C23H29ClO4	404.93	28	0	0.7	3	4	0	109.27	60.44	3.3	3.57	4.75	3.5	4.67	3.96	-4.4	0.0161	3.97e-05	Moderately soluble	-4.53	0.0121	2.99e-05	Moderately soluble	-4.98	0.00423	1.04e-05	Moderately soluble	High	Yes	No	No	No	Yes	No	No	-6.24	0	0	0	0	0	0.55	0	0	2	5.25
ZINC3830541	ClCCN(C(=O)N[C@H]1[C@@H](O)O[C@H]([C@H]([C@H]1O)O)CO)N=O	C9H16ClN3O7	313.69	20	0	0.89	7	8	5	64.82	151.92	1.11	-0.66	-2.28	-1.99	-2.57	-1.28	-0.91	38.9	0.124	Very soluble	-2.06	2.75	0.00878	Soluble	1.34	6880	21.9	Soluble	Low	No	Yes	No	No	No	No	No	-8.68	0	1	1	1	1	0.55	0	2	0	4.31
ZINC3830543	ClCCN(C(=O)N[C@H]1[C@@H](O)O[C@H]([C@H]([C@@H]1O)O)CO)N=O	C9H16ClN3O7	313.69	20	0	0.89	7	8	5	64.82	151.92	0.79	-0.66	-2.28	-1.99	-2.57	-1.34	-0.91	38.9	0.124	Very soluble	-2.06	2.75	0.00878	Soluble	1.34	6880	21.9	Soluble	Low	No	Yes	No	No	No	No	No	-8.68	0	1	1	1	1	0.55	0	2	0	4.31
ZINC3830544	ClCCN(C(=O)N[C@@H]1[C@@H](O)O[C@H]([C@H]([C@@H]1O)O)CO)N=O	C9H16ClN3O7	313.69	20	0	0.89	7	8	5	64.82	151.92	0.97	-0.66	-2.28	-1.99	-2.57	-1.31	-0.91	38.9	0.124	Very soluble	-2.06	2.75	0.00878	Soluble	1.34	6880	21.9	Soluble	Low	No	Yes	No	No	No	No	No	-8.68	0	1	1	1	1	0.55	0	2	0	4.31
ZINC3830558	OC[C@@H]1O[C@H]([C@H]([C@@H]([C@@H]1O)O)O)c1c(O)c2c(c(c1O)O)C(=O)c1c(C2=O)c(C)c(c(c1)O)C(=O)[O-]	C22H19O13-	491.38	35	12	0.32	3	13	8	110.44	245.34	-0.08	0.53	-2.85	-2.95	-0.55	-1.18	-3.28	0.26	0.000529	Soluble	-5.25	0.00274	5.58e-06	Moderately soluble	-0.62	119	0.242	Soluble	Low	No	Yes	No	No	No	No	No	-8.92	2	2	1	1	3	0.11	2	2	1	5
ZINC3830565	OC[C@@H]1O[C@@H](C[C@@H]1O)n1cnc2c1nc(Cl)nc2N	C10H12ClN5O3	285.69	19	9	0.5	2	6	3	66.52	119.31	1.51	0.02	-0.61	-0.98	-0.84	-0.18	-1.84	4.11	0.0144	Very soluble	-2.08	2.39	0.00837	Soluble	-1.01	28.2	0.0986	Soluble	High	No	No	No	No	No	No	No	-8.03	0	1	0	0	0	0.55	0	0	0	3.65
ZINC3830567	OC[C@@H]1O[C@H](C[C@H]1O)n1cnc2c1nc(Cl)nc2N	C10H12ClN5O3	285.69	19	9	0.5	2	6	3	66.52	119.31	1.53	0.02	-0.61	-0.98	-0.84	-0.18	-1.84	4.11	0.0144	Very soluble	-2.08	2.39	0.00837	Soluble	-1.01	28.2	0.0986	Soluble	High	No	No	No	No	No	No	No	-8.03	0	1	0	0	0	0.55	0	0	0	3.65
ZINC3830570	[O-]C(=O)[C@@H]1N2[C@@H](O/C/1=C\CO)CC2=O	C8H8NO5-	198.15	14	0	0.5	2	5	1	44.96	89.9	0.85	-1.45	-2.81	-0.83	-0.88	-1.02	-0.02	188	0.948	Very soluble	0.07	230	1.16	Highly soluble	0.99	1960	9.89	Soluble	Low	No	No	No	No	No	No	No	-8.54	0	1	0	0	1	0.56	0	0	1	3.67
ZINC3830577	[O-]C(=O)[C@@H]1CCc2c1cc(Cl)c(c2)C1CCCCC1	C16H18ClO2-	277.77	19	6	0.56	2	2	0	75.6	40.13	2.54	4.97	3.17	4.02	4.37	3.81	-4.79	0.00445	1.6e-05	Moderately soluble	-5.55	0.000781	2.81e-06	Moderately soluble	-4.42	0.0105	3.79e-05	Moderately soluble	High	Yes	No	No	Yes	Yes	No	No	-4.47	0	0	0	0	0	0.85	0	0	1	3.01
ZINC3830581	CCC[C@@H]1C[NH+]([C@H](C1)C(=O)N[C@@H]([C@H]1O[C@@H](SC)[C@H]([C@H]([C@H]1O)O)O)[C@H](Cl)C)C	C18H34ClN2O5S+	425.99	27	0	0.94	8	5	5	112.14	128.76	2.7	2.16	-1.41	-3.75	0.65	0.07	-3.31	0.207	0.000485	Soluble	-4.5	0.0136	3.19e-05	Moderately soluble	-1.2	27	0.0634	Soluble	Low	No	Yes	No	No	No	No	No	-7.36	0	1	0	0	0	0.55	0	1	2	5.68
ZINC3830582	CCC[C@H]1C[NH+]([C@@H](C1)C(=O)N[C@@H]([C@H]1O[C@@H](SC)[C@H]([C@H]([C@H]1O)O)O)[C@H](Cl)C)C	C18H34ClN2O5S+	425.99	27	0	0.94	8	5	5	112.14	128.76	3.33	2.16	-1.41	-3.75	0.65	0.2	-3.31	0.207	0.000485	Soluble	-4.5	0.0136	3.19e-05	Moderately soluble	-1.2	27	0.0634	Soluble	Low	No	Yes	No	No	No	No	No	-7.36	0	1	0	0	0	0.55	0	1	2	5.68
ZINC3830593	[O-]C(=O)[C@H]1N2C(=O)[C@H]([C@H]2SC1(C)C)NC(=O)c1c(C)onc1c1ccccc1Cl	C19H17ClN3O5S-	434.87	29	11	0.37	5	6	1	108.8	140.87	2.24	2.43	0.83	2.06	2.23	1.96	-4.02	0.0417	9.6e-05	Moderately soluble	-5.03	0.00405	9.31e-06	Moderately soluble	-4.81	0.00672	1.55e-05	Moderately soluble	High	No	No	No	Yes	No	No	Yes	-7.23	0	0	1	1	0	0.56	0	0	1	4.58
ZINC3830595	[O-]C(=O)[C@H]1N2C(=O)[C@H]([C@@H]2SC1(C)C)NC(=O)c1c(C)onc1c1ccccc1Cl	C19H17ClN3O5S-	434.87	29	11	0.37	5	6	1	108.8	140.87	2.4	2.43	0.83	2.06	2.23	1.99	-4.02	0.0417	9.6e-05	Moderately soluble	-5.03	0.00405	9.31e-06	Moderately soluble	-4.81	0.00672	1.55e-05	Moderately soluble	High	No	No	No	Yes	No	No	Yes	-7.23	0	0	1	1	0	0.56	0	0	1	4.58
ZINC3830600	OCC(=O)[C@@]1(O)CC[C@H]2[C@@]1(C)CC(=O)[C@H]1[C@H]2CCC2=CC(=O)CC[C@]12C	C21H28O5	360.44	26	0	0.76	2	5	2	96.57	91.67	2.07	1.47	1.99	1.3	3.06	1.98	-2.87	0.488	0.00135	Soluble	-3	0.359	0.000996	Soluble	-3.33	0.169	0.000468	Soluble	High	No	Yes	No	No	No	No	No	-7.46	0	0	0	0	0	0.55	1	0	1	5.07
ZINC3830601	OCC(=O)[C@@]1(O)CC[C@H]2[C@@]1(C)CC(=O)[C@H]1[C@@H]2CCC2=CC(=O)CC[C@@]12C	C21H28O5	360.44	26	0	0.76	2	5	2	96.57	91.67	1.89	1.47	1.99	1.3	3.06	1.94	-2.87	0.488	0.00135	Soluble	-3	0.359	0.000996	Soluble	-3.33	0.169	0.000468	Soluble	High	No	Yes	No	No	No	No	No	-7.46	0	0	0	0	0	0.55	1	0	1	5.07
ZINC3830606	CC(=O)OCC(=O)[C@@]1(O)CC[C@H]2[C@]1(C)CC(=O)[C@@H]1[C@@H]2CCC2=CC(=O)CC[C@@]12C	C23H30O6	402.48	29	0	0.74	4	6	1	106.31	97.74	1.8	2.1	2.56	1.64	3.55	2.33	-3.39	0.162	0.000403	Soluble	-3.78	0.0663	0.000165	Soluble	-3.95	0.0454	0.000113	Soluble	High	No	Yes	No	No	No	No	No	-7.26	0	0	0	0	0	0.55	1	0	1	5.09
ZINC3830609	[O-]C(=O)[C@@H]1N2C(=O)[C@H]([C@H]2SC1(C)C)NC(=O)C1([NH3+])CCCCC1	C15H23N3O4S	341.43	23	0	0.8	4	4	2	89.35	142.48	1.98	1.31	-2.15	-2.92	0.01	-0.36	-2.52	1.04	0.00303	Soluble	-3.9	0.0427	0.000125	Soluble	-1.31	16.9	0.0494	Soluble	Low	No	Yes	No	No	No	No	No	-7.45	0	1	1	1	0	0.55	0	0	0	4.33
ZINC3830612	C[C@H]1C[C@@H](OC(=O)[C@@H](c2ccccc2)O)CC(C1)(C)C	C17H24O3	276.37	20	6	0.59	4	3	1	79.55	46.53	3.1	4.24	3.15	2.87	3.25	3.32	-4.18	0.0181	6.57e-05	Moderately soluble	-4.93	0.00326	1.18e-05	Moderately soluble	-3.92	0.0336	0.000122	Soluble	High	Yes	No	No	No	No	Yes	No	-4.98	0	0	0	0	0	0.55	0	0	1	3.5
ZINC3830617	O=C1C=C2C(=C[C@H]3[C@H]([C@@]2([C@@H]2[C@H]1C2)C)CC[C@]1([C@@H]3CC[C@]1(O)C(=O)C)C)Cl	C22H27ClO3	374.9	26	0	0.73	1	3	1	102.23	54.37	3.05	3.06	4.04	3.41	4.03	3.52	-4.03	0.0353	9.41e-05	Moderately soluble	-3.87	0.0508	0.000135	Soluble	-4.17	0.0256	6.84e-05	Moderately soluble	High	Yes	Yes	No	No	No	No	No	-6.41	0	0	0	0	0	0.55	0	0	1	5.54
ZINC3830620	CC(=O)O[C@@]1(CC[C@H]2[C@]1(C)CC[C@@H]1[C@@H]2C=C(C2=CC(=O)[C@H]3[C@@H]([C@@]12C)C3)Cl)C(=O)C	C24H29ClO4	416.94	29	0	0.71	3	4	0	111.96	60.44	3.37	3.64	4.61	3.71	4.51	3.97	-4.52	0.0126	3.02e-05	Moderately soluble	-4.6	0.0105	2.53e-05	Moderately soluble	-4.78	0.0069	1.66e-05	Moderately soluble	High	Yes	No	No	No	Yes	No	No	-6.26	0	0	0	0	0	0.55	0	0	2	5.54
ZINC3830624	OC[C@@H]1O[C@H]([C@@H]([C@@H]1O)O)n1ccc(nc1=O)N	C9H13N3O5	243.22	17	6	0.56	2	6	4	55.85	130.83	-0.21	-2.13	-2.88	-2.29	-2.25	-1.95	-0.14	178	0.732	Very soluble	-0.09	198	0.816	Very soluble	1.01	2490	10.2	Soluble	Low	No	No	No	No	No	No	No	-9.3	0	1	0	0	1	0.55	0	0	1	3.84
ZINC3830627	C#C[C@@]1(O)CC[C@@H]2[C@@]1(C)CC[C@@H]1[C@@H]2CCC2=Cc3c(C[C@@]12C)cno3	C22H27NO2	337.46	25	5	0.68	0	3	1	98.86	46.26	3.37	3.7	4.19	3.97	4.27	3.9	-4.41	0.0131	3.88e-05	Moderately soluble	-4.36	0.0147	4.34e-05	Moderately soluble	-4.67	0.00718	2.13e-05	Moderately soluble	High	Yes	Yes	Yes	No	Yes	No	No	-5.73	0	0	0	0	0	0.55	0	1	1	5.5
ZINC3830629	C#C[C@@]1(O)CC[C@@H]2[C@@]1(C)CC[C@H]1[C@@H]2CCC2=Cc3c(C[C@@]12C)cno3	C22H27NO2	337.46	25	5	0.68	0	3	1	98.86	46.26	3.3	3.7	4.19	3.97	4.27	3.88	-4.41	0.0131	3.88e-05	Moderately soluble	-4.36	0.0147	4.34e-05	Moderately soluble	-4.67	0.00718	2.13e-05	Moderately soluble	High	Yes	Yes	Yes	No	Yes	No	No	-5.73	0	0	0	0	0	0.55	0	1	1	5.5
ZINC3830632	COc1cccc2c1C(=O)c1c(C2=O)c(O)c2c(c1O)[C@H](O[C@H]1C[C@@H]([NH3+])[C@H]([C@@H](O1)C)O)C[C@](C2)(O)C(=O)C	C27H30NO10+	528.53	38	12	0.44	4	10	5	132.76	187.46	2.8	1.83	-0.01	-5.03	1.77	0.27	-4.24	0.0305	5.76e-05	Moderately soluble	-5.39	0.00217	4.1e-06	Moderately soluble	-4.04	0.0483	9.14e-05	Moderately soluble	Low	No	Yes	No	No	No	No	No	-8.22	2	2	1	1	1	0.17	1	1	1	5.81
ZINC3830636	[O-]C(=O)CC[C@@H]([C@@H]1CC[C@@H]2[C@]1(C)C(=O)C[C@@H]1[C@@H]2C(=O)C[C@@H]2[C@]1(C)CCC(=O)C2)C	C24H33O5-	401.52	29	0	0.83	4	5	0	108.94	91.34	2.3	2.56	2.74	2.75	4.29	2.93	-3.68	0.0842	0.00021	Soluble	-4.13	0.0301	7.48e-05	Moderately soluble	-4.4	0.016	3.98e-05	Moderately soluble	High	No	No	No	No	No	No	No	-6.93	0	0	0	0	0	0.56	0	0	1	4.49
ZINC3830637	[O-]C(=O)CC[C@H]([C@@H]1CC[C@@H]2[C@]1(C)C(=O)C[C@@H]1[C@@H]2C(=O)C[C@@H]2[C@]1(C)CCC(=O)C2)C	C24H33O5-	401.52	29	0	0.83	4	5	0	108.94	91.34	2.42	2.56	2.74	2.75	4.29	2.95	-3.68	0.0842	0.00021	Soluble	-4.13	0.0301	7.48e-05	Moderately soluble	-4.4	0.016	3.98e-05	Moderately soluble	High	No	No	No	No	No	No	No	-6.93	0	0	0	0	0	0.56	0	0	1	4.49
ZINC3830639	[O-]C(=O)CC[C@H]([C@H]1CC[C@@H]2[C@]1(C)C(=O)C[C@@H]1[C@@H]2C(=O)C[C@@H]2[C@]1(C)CCC(=O)C2)C	C24H33O5-	401.52	29	0	0.83	4	5	0	108.94	91.34	2.68	2.56	2.74	2.75	4.29	3	-3.68	0.0842	0.00021	Soluble	-4.13	0.0301	7.48e-05	Moderately soluble	-4.4	0.016	3.98e-05	Moderately soluble	High	No	No	No	No	No	No	No	-6.93	0	0	0	0	0	0.56	0	0	1	4.49
ZINC3830640	O[C@H]1CC[C@]2(C(=CC[C@H]3[C@H]2CC[C@@]2([C@H]3CCC2=O)C)C1)C	C19H28O2	288.42	21	0	0.84	0	2	1	85.36	37.3	2.9	3.23	3.88	3.59	3.58	3.44	-3.66	0.0626	0.000217	Soluble	-3.69	0.0594	0.000206	Soluble	-3.48	0.0946	0.000328	Soluble	High	Yes	No	No	No	No	No	No	-5.77	0	0	0	0	0	0.55	0	1	0	4.66
ZINC3830641	O[C@H]1CC[C@]2(C(=CC[C@H]3[C@H]2CC[C@]2([C@H]3CCC2=O)C)C1)C	C19H28O2	288.42	21	0	0.84	0	2	1	85.36	37.3	2.92	3.23	3.88	3.59	3.58	3.44	-3.66	0.0626	0.000217	Soluble	-3.69	0.0594	0.000206	Soluble	-3.48	0.0946	0.000328	Soluble	High	Yes	No	No	No	No	No	No	-5.77	0	0	0	0	0	0.55	0	1	0	4.66
ZINC3830645	CC(=O)O[C@H]1CC[C@]2(C(=CC[C@@H]3[C@H]2CC[C@@]2([C@@H]3CCC2=O)C)C1)C	C21H30O3	330.46	24	0	0.81	2	3	0	95.1	43.37	3.1	3.8	4.45	3.88	4.02	3.85	-4.15	0.0233	7.07e-05	Moderately soluble	-4.41	0.013	3.93e-05	Moderately soluble	-4.11	0.0254	7.69e-05	Moderately soluble	High	Yes	No	No	No	Yes	No	No	-5.62	0	0	0	0	0	0.55	0	1	1	4.82
ZINC3830647	CC(=O)O[C@H]1CC[C@@]2(C(=CC[C@@H]3[C@H]2CC[C@@]2([C@@H]3CCC2=O)C)C1)C	C21H30O3	330.46	24	0	0.81	2	3	0	95.1	43.37	3.08	3.8	4.45	3.88	4.02	3.85	-4.15	0.0233	7.07e-05	Moderately soluble	-4.41	0.013	3.93e-05	Moderately soluble	-4.11	0.0254	7.69e-05	Moderately soluble	High	Yes	No	No	No	Yes	No	No	-5.62	0	0	0	0	0	0.55	0	1	1	4.82
ZINC3830656	CC(=O)OCC(=O)[C@@H]1CC[C@@H]2[C@]1(C)CC[C@@H]1[C@@H]2CCC2=CC(=O)CC[C@@]12C	C23H32O4	372.5	27	0	0.78	4	4	0	104.91	60.44	3.35	3.08	4.27	3.37	4.35	3.68	-3.83	0.0556	0.000149	Soluble	-4.02	0.0359	9.63e-05	Moderately soluble	-4.44	0.0136	3.64e-05	Moderately soluble	High	Yes	No	No	No	No	No	No	-6.39	0	0	0	0	0	0.55	0	0	1	4.87
ZINC3830658	CC(=O)OCC(=O)[C@@H]1CC[C@H]2[C@]1(C)CC[C@@H]1[C@@H]2CCC2=CC(=O)CC[C@@]12C	C23H32O4	372.5	27	0	0.78	4	4	0	104.91	60.44	3.01	3.08	4.27	3.37	4.35	3.62	-3.83	0.0556	0.000149	Soluble	-4.02	0.0359	9.63e-05	Moderately soluble	-4.44	0.0136	3.64e-05	Moderately soluble	High	Yes	No	No	No	No	No	No	-6.39	0	0	0	0	0	0.55	0	0	1	4.87
ZINC3830665	CC[C@]12CC(=C)[C@@H]3[C@@H]([C@@H]1CC[C@]2(O)C#C)CCC1=CCCC[C@@H]31	C22H30O	310.47	23	0	0.73	1	1	1	97.57	20.23	3.48	4.73	4.95	5.1	4.86	4.62	-4.68	0.0065	2.09e-05	Moderately soluble	-4.88	0.00405	1.31e-05	Moderately soluble	-4.07	0.0264	8.49e-05	Moderately soluble	High	Yes	No	No	Yes	Yes	No	No	-4.84	1	0	0	0	1	0.55	0	2	1	5.45
ZINC3830673	CCCCC(=O)OCC(=O)[C@@]1(O)[C@H](C)C[C@@H]2[C@]1(C)C[C@H](O)[C@@]1([C@@H]2CCC2=CC(=O)C=C[C@]12C)F	C27H37FO6	476.58	34	0	0.74	7	7	2	126.11	100.9	3.61	3.87	4.06	2.57	4.31	3.68	-4.77	0.00808	1.69e-05	Moderately soluble	-5.69	0.000982	2.06e-06	Moderately soluble	-4.58	0.0125	2.62e-05	Moderately soluble	High	No	Yes	No	No	No	No	Yes	-6.46	0	1	0	0	0	0.55	0	0	2	5.89
ZINC3830678	OC[C@H]1O[C@@H](O)[C@H]([C@H]([C@H]1O)O)O	C6H12O6	180.16	12	0	1	1	6	5	35.74	110.38	0.37	-3.24	-3.22	-2.75	-2.3	-2.23	1.15	2550	14.1	Highly soluble	1.49	5610	31.1	Highly soluble	2.62	74200	412	Soluble	Low	No	Yes	No	No	No	No	No	-9.7	0	2	0	0	2	0.55	0	0	1	4.08
ZINC3830679	OC[C@H]1O[C@@H](O)[C@H]([C@H]([C@@H]1O)O)O	C6H12O6	180.16	12	0	1	1	6	5	35.74	110.38	0.57	-3.24	-3.22	-2.75	-2.3	-2.19	1.15	2550	14.1	Highly soluble	1.49	5610	31.1	Highly soluble	2.62	74200	412	Soluble	Low	No	Yes	No	No	No	No	No	-9.7	0	2	0	0	2	0.55	0	0	1	4.08
ZINC3830689	ClC(C(=O)[O-])Cl	C2HCl2O2-	127.93	6	0	0.5	1	2	0	21.15	40.13	0.68	0.92	-0.46	0.49	0.94	0.51	-1.15	9.12	0.0713	Very soluble	-1.35	5.73	0.0448	Very soluble	-0.5	40.8	0.319	Soluble	High	No	No	No	No	No	No	No	-6.43	0	4	0	0	2	0.85	0	1	1	1.67
ZINC3830690	[O-]C(=O)[C@H]1N2C(=O)[C@H]([C@H]2SC1(C)C)NC(=O)c1c(C)onc1c1c(Cl)cccc1Cl	C19H16Cl2N3O5S-	469.32	30	11	0.37	5	6	1	113.81	140.87	2.34	2.91	1.49	2.55	2.89	2.43	-4.52	0.014	2.99e-05	Moderately soluble	-5.53	0.00139	2.96e-06	Moderately soluble	-5.39	0.0019	4.06e-06	Moderately soluble	High	No	No	No	Yes	No	No	Yes	-7.1	0	0	1	1	0	0.56	0	0	1	4.59
ZINC3830707	CCCCC[C@@H](/C=C/[C@@H]1[C@H](O)C[C@@H]([C@@H]1C/C=C\CCCC(=O)[O-])O)O	C20H33O5-	353.47	25	0	0.75	12	5	3	98.51	100.82	2.88	2.72	1.71	1.98	3.33	2.52	-2.95	0.394	0.00111	Soluble	-4.49	0.0114	3.23e-05	Moderately soluble	-1.81	5.53	0.0156	Soluble	High	No	Yes	No	No	No	No	No	-6.52	0	0	1	0	0	0.56	0	1	2	5
ZINC3830714	CCCCC[C@H](/C=C/[C@H]1[C@H](O)CC(=O)[C@@H]1C/C=C\CCCC(=O)[O-])O	C20H31O5-	351.46	25	0	0.7	12	5	2	97.55	97.66	3.07	2.82	1.92	1.89	3.92	2.72	-3	0.349	0.000992	Soluble	-4.53	0.0104	2.96e-05	Moderately soluble	-2.5	1.11	0.00315	Soluble	High	No	Yes	No	No	No	No	No	-6.44	0	0	1	0	0	0.56	0	1	2	4.86
ZINC3830725	C[C@H]1O[C@H]([C@H]([C@H]1O)O)n1cc(F)c(=O)[nH]c1=O	C9H11FN2O5	246.19	17	6	0.56	1	6	3	53.07	104.55	1.26	-1.89	-1.59	-0.62	-0.36	-0.64	-0.37	105	0.426	Very soluble	0.21	403	1.64	Highly soluble	-0.09	199	0.809	Soluble	High	No	No	No	No	No	No	No	-9.14	0	1	0	0	0	0.55	0	0	1	3.81
ZINC3830726	C[C@@H]1O[C@H]([C@H]([C@H]1O)O)n1cc(F)c(=O)[nH]c1=O	C9H11FN2O5	246.19	17	6	0.56	1	6	3	53.07	104.55	1.06	-1.89	-1.59	-0.62	-0.36	-0.68	-0.37	105	0.426	Very soluble	0.21	403	1.64	Highly soluble	-0.09	199	0.809	Soluble	High	No	No	No	No	No	No	No	-9.14	0	1	0	0	0	0.55	0	0	1	3.81
ZINC3830743	O=C1CC[C@@]2(C(=C1)C=C[C@H]1[C@H]2CC[C@]2([C@H]1CC[C@@H]2C(=O)C)C)C	C21H28O2	312.45	23	0	0.71	1	2	0	93.54	34.14	3	3.79	4.5	3.86	4.08	3.85	-4.1	0.0249	7.96e-05	Moderately soluble	-4.2	0.0197	6.29e-05	Moderately soluble	-3.92	0.038	0.000122	Soluble	High	Yes	No	No	Yes	Yes	No	No	-5.52	0	0	0	0	0	0.55	0	0	1	5.23
ZINC3830745	O=C1CC[C@@]2(C(=C1)C=C[C@H]1[C@H]2CC[C@]2([C@@H]1CC[C@@H]2C(=O)C)C)C	C21H28O2	312.45	23	0	0.71	1	2	0	93.54	34.14	3.04	3.79	4.5	3.86	4.08	3.86	-4.1	0.0249	7.96e-05	Moderately soluble	-4.2	0.0197	6.29e-05	Moderately soluble	-3.92	0.038	0.000122	Soluble	High	Yes	No	No	Yes	Yes	No	No	-5.52	0	0	0	0	0	0.55	0	0	1	5.23
ZINC3830746	CC[C@@H]1C[NH+]2CCc3c([C@@H]2C[C@@H]1C[C@H]1[NH2+]CCc2c1cc(OC)c(c2)OC)cc(c(c3)OC)OC	C29H42N2O4++	482.65	35	12	0.59	7	4	2	148.98	57.97	4.92	4.74	1.09	-4.33	4.98	2.28	-5.61	0.00118	2.45e-06	Moderately soluble	-5.69	0.000992	2.05e-06	Moderately soluble	-7.7	9.63e-06	2e-08	Poorly soluble	High	Yes	Yes	No	No	No	No	No	-5.88	0	3	0	0	0	0.55	0	0	2	4.95
ZINC3830747	CC[C@H]1C[NH+]2CCc3c([C@@H]2C[C@@H]1C[C@H]1[NH2+]CCc2c1cc(OC)c(c2)OC)cc(c(c3)OC)OC	C29H42N2O4++	482.65	35	12	0.59	7	4	2	148.98	57.97	4.89	4.74	1.09	-4.33	4.98	2.28	-5.61	0.00118	2.45e-06	Moderately soluble	-5.69	0.000992	2.05e-06	Moderately soluble	-7.7	9.63e-06	2e-08	Poorly soluble	High	Yes	Yes	No	No	No	No	No	-5.88	0	3	0	0	0	0.55	0	0	2	4.95
ZINC3830749	CCOC(=O)[C@H]([NH2+][C@@H](C(=O)N1CCC[C@@H]1C(=O)[O-])C)CCc1ccccc1	C20H28N2O5	376.45	27	6	0.55	11	5	1	103.97	103.35	2.54	-0.07	-1.14	-2.36	2.22	0.24	-1.57	10.2	0.027	Very soluble	-1.65	8.45	0.0224	Very soluble	-3.7	0.0746	0.000198	Soluble	High	No	No	No	No	No	No	No	-8.65	0	1	1	0	0	0.55	0	0	2	3.61
ZINC3830763	Oc1ccc2c(c1)CC[C@H]1[C@@H]2CC[C@]2([C@H]1CC[C@@H]2O)C	C18H24O2	272.38	20	6	0.67	0	2	2	81.03	40.46	2.57	4.01	3.61	3.53	3.25	3.39	-4.28	0.0144	5.28e-05	Moderately soluble	-4.56	0.00747	2.74e-05	Moderately soluble	-3.75	0.0485	0.000178	Soluble	High	Yes	Yes	No	No	No	Yes	No	-5.11	0	0	0	0	0	0.55	0	0	1	3.49
ZINC3830766	O=C(c1ccccc1)Oc1ccc2c(c1)CC[C@H]1[C@@H]2CC[C@@]2([C@H]1CC[C@@H]2O)C	C25H28O3	376.49	28	12	0.48	3	3	1	110.4	46.53	3.8	4.47	5.12	4.93	4.75	4.62	-5.11	0.00293	7.77e-06	Moderately soluble	-5.17	0.00256	6.81e-06	Moderately soluble	-6.47	0.000127	3.38e-07	Poorly soluble	High	Yes	No	No	No	No	Yes	No	-5.42	1	0	0	0	0	0.55	0	1	2	4.25
ZINC3830768	O=C(c1ccccc1)Oc1ccc2c(c1)CC[C@H]1[C@H]2CC[C@@]2([C@H]1CC[C@@H]2O)C	C25H28O3	376.49	28	12	0.48	3	3	1	110.4	46.53	3.86	4.47	5.12	4.93	4.75	4.63	-5.11	0.00293	7.77e-06	Moderately soluble	-5.17	0.00256	6.81e-06	Moderately soluble	-6.47	0.000127	3.38e-07	Poorly soluble	High	Yes	No	No	No	No	Yes	No	-5.42	1	0	0	0	0	0.55	0	1	2	4.25
ZINC3830770	O=C(O[C@H]1CC[C@@H]2[C@@]1(C)CC[C@H]1[C@@H]2CCc2c1ccc(c2)O)CCC1CCCC1	C26H36O3	396.56	29	6	0.73	5	3	1	117.49	46.53	3.85	7.07	6.13	5.11	5.4	5.51	-6.58	0.000105	2.66e-07	Poorly soluble	-7.86	5.41e-06	1.36e-08	Poorly soluble	-5.91	0.000494	1.24e-06	Moderately soluble	High	No	No	No	No	Yes	No	No	-3.7	1	1	0	1	1	0.55	0	0	2	4.45
ZINC3830771	O=C(O[C@H]1CC[C@@H]2[C@]1(C)CC[C@H]1[C@@H]2CCc2c1ccc(c2)O)CCC1CCCC1	C26H36O3	396.56	29	6	0.73	5	3	1	117.49	46.53	4.06	7.07	6.13	5.11	5.4	5.56	-6.58	0.000105	2.66e-07	Poorly soluble	-7.86	5.41e-06	1.36e-08	Poorly soluble	-5.91	0.000494	1.24e-06	Moderately soluble	High	No	No	No	No	Yes	No	No	-3.7	1	1	0	1	1	0.55	0	0	2	4.45
ZINC3830774	CCC(=O)Oc1ccc2c(c1)CC[C@@H]1[C@@H]2CC[C@@]2([C@@H]1CC[C@@H]2OC(=O)CC)C	C24H32O4	384.51	28	6	0.67	6	4	0	109.85	52.6	4.12	4.32	5.18	4.58	4.94	4.63	-4.71	0.00753	1.96e-05	Moderately soluble	-5.14	0.00279	7.27e-06	Moderately soluble	-5.8	0.000615	1.6e-06	Moderately soluble	High	Yes	No	No	Yes	Yes	Yes	Yes	-5.58	1	0	0	0	0	0.55	0	1	2	4.47
ZINC3830776	CCC(=O)Oc1ccc2c(c1)CC[C@@H]1[C@H]2CC[C@@]2([C@@H]1CC[C@@H]2OC(=O)CC)C	C24H32O4	384.51	28	6	0.67	6	4	0	109.85	52.6	4.04	4.32	5.18	4.58	4.94	4.61	-4.71	0.00753	1.96e-05	Moderately soluble	-5.14	0.00279	7.27e-06	Moderately soluble	-5.8	0.000615	1.6e-06	Moderately soluble	High	Yes	No	No	Yes	Yes	Yes	Yes	-5.58	1	0	0	0	0	0.55	0	1	2	4.47
ZINC3830778	CCCCCCC(=O)O[C@@H]1CC[C@@H]2[C@]1(C)CC[C@@H]1[C@@H]2CCc2c1ccc(c2)O	C25H36O3	384.55	28	6	0.72	7	3	1	114.8	46.53	3.78	7.04	6.13	4.91	5.65	5.5	-6.36	0.000169	4.41e-07	Poorly soluble	-7.83	5.64e-06	1.47e-08	Poorly soluble	-6.36	0.000168	4.38e-07	Poorly soluble	High	No	No	No	No	Yes	Yes	Yes	-3.65	1	1	0	1	1	0.55	0	0	2	4.41
ZINC3830780	CCCCCCC(=O)O[C@@H]1CC[C@H]2[C@]1(C)CC[C@@H]1[C@@H]2CCc2c1ccc(c2)O	C25H36O3	384.55	28	6	0.72	7	3	1	114.8	46.53	4.29	7.04	6.13	4.91	5.65	5.6	-6.36	0.000169	4.41e-07	Poorly soluble	-7.83	5.64e-06	1.47e-08	Poorly soluble	-6.36	0.000168	4.38e-07	Poorly soluble	High	No	No	No	Yes	Yes	Yes	No	-3.65	1	1	0	1	1	0.55	0	0	2	4.41
ZINC3830782	CCCCC(=O)O[C@@H]1CC[C@@H]2[C@]1(C)CC[C@@H]1[C@@H]2CCc2c1ccc(c2)O	C23H32O3	356.5	26	6	0.7	5	3	1	105.18	46.53	3.54	5.95	5.35	4.49	4.85	4.84	-5.64	0.000818	2.29e-06	Moderately soluble	-6.7	7.07e-05	1.98e-07	Poorly soluble	-5.57	0.000957	2.69e-06	Moderately soluble	High	Yes	No	No	Yes	Yes	Yes	No	-4.25	1	0	0	0	1	0.55	0	0	2	4.16
ZINC3830784	CCCCC(=O)O[C@@H]1CC[C@H]2[C@]1(C)CC[C@@H]1[C@@H]2CCc2c1ccc(c2)O	C23H32O3	356.5	26	6	0.7	5	3	1	105.18	46.53	3.8	5.95	5.35	4.49	4.85	4.89	-5.64	0.000818	2.29e-06	Moderately soluble	-6.7	7.07e-05	1.98e-07	Poorly soluble	-5.57	0.000957	2.69e-06	Moderately soluble	High	Yes	No	No	Yes	Yes	Yes	No	-4.25	1	0	0	0	1	0.55	0	0	2	4.16
ZINC3830786	O=C1CC[C@@H]2[C@]1(C)CC[C@H]1[C@@H]2CCc2c1ccc(c2)OS(=O)(=O)[O-]	C18H21O5S-	349.42	24	6	0.61	2	5	0	88.41	91.88	1.88	2.54	4.03	2.74	2.16	2.67	-3.66	0.0765	0.000219	Soluble	-4.12	0.0267	7.65e-05	Moderately soluble	-4.07	0.0298	8.53e-05	Moderately soluble	High	No	Yes	No	Yes	No	No	No	-6.63	0	0	0	0	0	0.56	0	2	0	3.99
ZINC3830788	O=C1CC[C@@H]2[C@]1(C)CC[C@@H]1[C@@H]2CCc2c1ccc(c2)OS(=O)(=O)[O-]	C18H21O5S-	349.42	24	6	0.61	2	5	0	88.41	91.88	1.74	2.54	4.03	2.74	2.16	2.64	-3.66	0.0765	0.000219	Soluble	-4.12	0.0267	7.65e-05	Moderately soluble	-4.07	0.0298	8.53e-05	Moderately soluble	High	No	Yes	No	Yes	No	No	No	-6.63	0	0	0	0	0	0.56	0	2	0	3.99
ZINC3830790	C#C[C@@]1(O)CC[C@@H]2[C@@]1(C)CC[C@H]1[C@@H]2CCc2c1ccc(c2)O	C20H24O2	296.4	22	6	0.6	0	2	2	88.84	40.46	2.72	3.67	3.69	3.9	3.94	3.58	-4.19	0.0191	6.43e-05	Moderately soluble	-4.21	0.0183	6.18e-05	Moderately soluble	-4.04	0.0269	9.08e-05	Moderately soluble	High	Yes	Yes	No	No	Yes	Yes	No	-5.5	0	0	0	0	0	0.55	0	1	1	4.01
ZINC3830794	C#C[C@@]1(O)CC[C@H]2[C@@]1(C)CC[C@H]1[C@H]2CCC2=CC(=O)CC[C@@]12C	C21H28O2	312.45	23	0	0.76	0	2	1	93.17	37.3	3.05	3.11	3.96	3.95	4.28	3.67	-3.74	0.0573	0.000183	Soluble	-3.56	0.0857	0.000274	Soluble	-3.77	0.0525	0.000168	Soluble	High	Yes	No	No	No	Yes	No	No	-6	0	0	0	0	0	0.55	0	1	0	5.12
ZINC3830796	C#C[C@@]1(O)CC[C@H]2[C@@]1(C)CC[C@H]1[C@@H]2CCC2=CC(=O)CC[C@@]12C	C21H28O2	312.45	23	0	0.76	0	2	1	93.17	37.3	2.84	3.11	3.96	3.95	4.28	3.63	-3.74	0.0573	0.000183	Soluble	-3.56	0.0857	0.000274	Soluble	-3.77	0.0525	0.000168	Soluble	High	Yes	Yes	No	No	Yes	No	No	-6	0	0	0	0	0	0.55	0	1	0	5.12
ZINC3830820	CCOC(=O)/C=C(/C=C/C=C(/C=C/c1c(C)cc(c(c1C)C)OC)\C)\C	C23H30O3	354.48	26	6	0.35	8	3	0	110.66	35.53	2.84	3.11	5.54	3.95	4.28	3.63	-3.74	0.0573	0.000183	Soluble	-3.56	0.0857	0.000274	Soluble	-3.77	0.0525	0.000168	Soluble	High	Yes	Yes	No	No	Yes	No	No	-6	0	0	0	0	0	0.55	0	1	0	5.12
ZINC3830823	O=C1C=C[C@@]2(C(=C1)C(=C)C[C@H]1[C@@H]2CC[C@@]2([C@H]1CCC2=O)C)C	C20H24O2	296.4	22	0	0.6	0	2	0	88.26	34.14	2.73	3.07	4.03	3.55	4.12	3.5	-3.61	0.0725	0.000244	Soluble	-3.45	0.104	0.000352	Soluble	-4.09	0.0239	8.07e-05	Moderately soluble	High	Yes	No	No	Yes	Yes	No	No	-5.93	0	0	0	0	0	0.55	0	0	0	5.03
ZINC3830824	O=C1C=C[C@@]2(C(=C1)C(=C)C[C@H]1[C@@H]2CC[C@]2([C@H]1CCC2=O)C)C	C20H24O2	296.4	22	0	0.6	0	2	0	88.26	34.14	2.73	3.07	4.03	3.55	4.12	3.5	-3.61	0.0725	0.000244	Soluble	-3.45	0.104	0.000352	Soluble	-4.09	0.0239	8.07e-05	Moderately soluble	High	Yes	No	No	Yes	Yes	No	No	-5.93	0	0	0	0	0	0.55	0	0	0	5.03
ZINC3830838	O=C1C=C[C@]2([C@H](N1)CC[C@H]1[C@H]2CC[C@]2([C@H]1CC[C@@H]2C(=O)NC(C)(C)C)C)C	C23H36N2O2	372.54	27	0	0.83	3	2	2	113.18	58.2	3.4	3.03	3.43	3.46	3.2	3.31	-3.86	0.0513	0.000138	Soluble	-3.92	0.045	0.000121	Soluble	-4.54	0.0107	2.86e-05	Moderately soluble	High	Yes	Yes	No	No	No	No	No	-6.42	0	0	0	0	0	0.55	0	0	1	5.37
ZINC3830839	O=C1C=C[C@]2([C@H](N1)CC[C@H]1[C@@H]2CC[C@@]2([C@H]1CC[C@@H]2C(=O)NC(C)(C)C)C)C	C23H36N2O2	372.54	27	0	0.83	3	2	2	113.18	58.2	3.35	3.03	3.43	3.46	3.2	3.3	-3.86	0.0513	0.000138	Soluble	-3.92	0.045	0.000121	Soluble	-4.54	0.0107	2.86e-05	Moderately soluble	High	Yes	Yes	No	No	No	No	No	-6.42	0	0	0	0	0	0.55	0	0	1	5.37
ZINC3830840	O=C1C=C[C@]2([C@H](N1)CC[C@H]1[C@@H]2CC[C@]2([C@H]1CC[C@@H]2C(=O)NC(C)(C)C)C)C	C23H36N2O2	372.54	27	0	0.83	3	2	2	113.18	58.2	3.38	3.03	3.43	3.46	3.2	3.3	-3.86	0.0513	0.000138	Soluble	-3.92	0.045	0.000121	Soluble	-4.54	0.0107	2.86e-05	Moderately soluble	High	Yes	Yes	No	No	No	No	No	-6.42	0	0	0	0	0	0.55	0	0	1	5.37
ZINC3830843	O=C1[C@@H](NC(=O)c2c(C)onc2c2c(F)cccc2Cl)[C@@H]2N1[C@H](C(=O)[O-])C(S2)(C)C	C19H16ClFN3O5S-	452.86	30	11	0.37	5	7	1	108.76	140.87	1.79	2.61	1.39	2.44	2.67	2.18	-4.23	0.0265	5.84e-05	Moderately soluble	-5.22	0.00274	6.06e-06	Moderately soluble	-5.07	0.00383	8.45e-06	Moderately soluble	High	No	No	No	Yes	No	No	Yes	-7.21	0	0	1	1	0	0.56	0	0	1	4.61
ZINC3830845	O=C1[C@@H](NC(=O)c2c(C)onc2c2c(F)cccc2Cl)[C@H]2N1[C@H](C(=O)[O-])C(S2)(C)C	C19H16ClFN3O5S-	452.86	30	11	0.37	5	7	1	108.76	140.87	2.82	2.61	1.39	2.44	2.67	2.39	-4.23	0.0265	5.84e-05	Moderately soluble	-5.22	0.00274	6.06e-06	Moderately soluble	-5.07	0.00383	8.45e-06	Moderately soluble	High	No	No	No	Yes	No	No	Yes	-7.21	0	0	1	1	0	0.56	0	0	1	4.61
ZINC3830847	COC(=O)Nc1nc2c([nH]1)cc(cc2)C(=O)c1ccc(cc1)F	C16H12FN3O3	313.28	23	15	0.06	5	5	2	81.71	84.08	1.58	2.84	3.34	2.07	2.97	2.56	-3.72	0.0591	0.000189	Soluble	-4.26	0.0171	5.45e-05	Moderately soluble	-5.77	0.000536	1.71e-06	Moderately soluble	High	No	No	Yes	No	No	No	No	-6.19	0	0	0	0	0	0.55	0	0	0	2.3
ZINC3830849	O[C@@H]1[C@H](O)[C@@H](O[C@H]1n1cnc2c1nc(F)nc2N)COP(=O)([O-])[O-]	C10H11FN5O7P--	363.2	24	9	0.5	4	11	3	70.48	201.54	0.5	-2.45	-0.74	-2.65	-3.08	-1.69	-0.56	99.6	0.274	Very soluble	-1.24	20.8	0.0574	Very soluble	1	3620	9.95	Soluble	Low	No	No	No	No	No	No	No	-10.25	1	1	1	1	3	0.11	0	1	1	4.36
ZINC3830851	O[C@H]1[C@H](O)[C@@H](O[C@H]1n1cnc2c1nc(F)nc2N)COP(=O)([O-])[O-]	C10H11FN5O7P--	363.2	24	9	0.5	4	11	3	70.48	201.54	-1.22	-2.45	-0.74	-2.65	-3.08	-2.03	-0.56	99.6	0.274	Very soluble	-1.24	20.8	0.0574	Very soluble	1	3620	9.95	Soluble	Low	No	No	No	No	No	No	No	-10.25	1	1	1	1	3	0.11	0	1	1	4.36
ZINC3830856	CC(=O)OCC(=O)[C@]1(O)CC[C@@H]2[C@]1(C)C[C@H](O)[C@@]1([C@@H]2CCC2=CC(=O)CC[C@]12C)F	C23H31FO6	422.49	30	0	0.78	4	7	2	107.36	100.9	2.63	1.69	2.86	1.84	3.37	2.48	-3.26	0.232	0.000549	Soluble	-3.42	0.159	0.000377	Soluble	-3.73	0.0779	0.000185	Soluble	High	No	Yes	No	No	No	No	No	-7.68	0	0	0	0	0	0.55	0	0	1	5.29
ZINC3830858	CC(=O)OCC(=O)[C@]1(O)CC[C@H]2[C@]1(C)C[C@H](O)[C@@]1([C@@H]2CCC2=CC(=O)CC[C@]12C)F	C23H31FO6	422.49	30	0	0.78	4	7	2	107.36	100.9	2.4	1.69	2.86	1.84	3.37	2.43	-3.26	0.232	0.000549	Soluble	-3.42	0.159	0.000377	Soluble	-3.73	0.0779	0.000185	Soluble	High	No	Yes	No	No	No	No	No	-7.68	0	0	0	0	0	0.55	0	0	1	5.29
ZINC3830859	CC(=O)OCC(=O)[C@@]1(O)CC[C@H]2[C@]1(C)C[C@H](O)[C@@]1([C@@H]2CCC2=CC(=O)CC[C@]12C)F	C23H31FO6	422.49	30	0	0.78	4	7	2	107.36	100.9	2.13	1.69	2.86	1.84	3.37	2.38	-3.26	0.232	0.000549	Soluble	-3.42	0.159	0.000377	Soluble	-3.73	0.0779	0.000185	Soluble	High	No	Yes	No	No	No	No	No	-7.68	0	0	0	0	0	0.55	0	0	1	5.29
ZINC3830864	[O-]C(=O)C[C@@H](C[C@H](/C=C/c1c(c2ccc(cc2)F)c2c(n1C(C)C)cccc2)O)O	C24H25FNO4-	410.46	30	15	0.29	8	5	2	114.49	85.52	3.11	3.49	3.6	2.92	4.57	3.54	-4.43	0.0154	3.75e-05	Moderately soluble	-4.97	0.00441	1.07e-05	Moderately soluble	-5.21	0.00254	6.18e-06	Moderately soluble	High	No	Yes	No	No	Yes	Yes	No	-6.33	0	0	0	0	0	0.56	0	0	2	4.27
ZINC3830871	CCC(=O)O[C@H](C(C)C)O[P@](=O)(CC(=O)N1C[C@@H](C[C@@H]1C(=O)[O-])C1CCCCC1)CCCCc1ccccc1	C30H45NO7P-	562.65	39	6	0.7	16	7	0	155.62	122.85	4.18	6.24	4.41	3.74	4.76	4.66	-6.32	0.000271	4.81e-07	Poorly soluble	-8.61	1.39e-06	2.48e-09	Poorly soluble	-6.02	0.000537	9.55e-07	Poorly soluble	Low	No	Yes	No	No	Yes	Yes	Yes	-5.3	1	3	1	0	2	0.56	0	2	3	6.14
ZINC3830873	CCC(=O)O[C@H](C(C)C)O[P@@](=O)(CC(=O)N1C[C@@H](C[C@@H]1C(=O)[O-])C1CCCCC1)CCCCc1ccccc1	C30H45NO7P-	562.65	39	6	0.7	16	7	0	155.62	122.85	4.5	6.24	4.41	3.74	4.76	4.73	-6.32	0.000271	4.81e-07	Poorly soluble	-8.61	1.39e-06	2.48e-09	Poorly soluble	-6.02	0.000537	9.55e-07	Poorly soluble	Low	No	Yes	No	No	Yes	Yes	Yes	-5.3	1	3	1	0	2	0.56	0	2	3	6.14
ZINC3830884	CC[C@]12C=CC3=C4CCC(=O)C=C4CC[C@@H]3[C@@H]1CC[C@]2(O)C#C	C21H24O2	308.41	23	0	0.57	1	2	1	92.48	37.3	2.96	2.16	3.8	3.77	4.14	3.37	-3.05	0.277	0.000897	Soluble	-2.58	0.819	0.00266	Soluble	-3.54	0.0894	0.00029	Soluble	High	Yes	Yes	No	Yes	Yes	No	No	-6.65	0	0	0	0	0	0.55	0	1	0	5.26
ZINC3830886	CC[C@]12C=CC3=C4CCC(=O)C=C4CC[C@H]3[C@@H]1CC[C@]2(O)C#C	C21H24O2	308.41	23	0	0.57	1	2	1	92.48	37.3	2.99	2.16	3.8	3.77	4.14	3.37	-3.05	0.277	0.000897	Soluble	-2.58	0.819	0.00266	Soluble	-3.54	0.0894	0.00029	Soluble	High	Yes	Yes	No	Yes	Yes	No	Yes	-6.65	0	0	0	0	0	0.55	0	1	0	5.26
ZINC3830887	OC[C@H]1O[C@@H](O)[C@H]([C@H]([C@H]1O)O)[NH3+]	C6H14NO5+	180.18	12	0	1	1	5	5	38.54	117.79	-2.05	-3.5	-3.97	-6.44	-2.54	-3.7	1.31	3710	20.6	Highly soluble	1.61	7290	40.5	Highly soluble	2.4	45200	251	Soluble	Low	No	Yes	No	No	No	No	No	-9.88	0	2	0	0	2	0.55	0	0	1	3.98
ZINC3830888	OC[C@@H]1O[C@@H](O)[C@H]([C@H]([C@H]1O)O)[NH3+]	C6H14NO5+	180.18	12	0	1	1	5	5	38.54	117.79	-0.04	-3.5	-3.97	-6.44	-2.54	-3.3	1.31	3710	20.6	Highly soluble	1.61	7290	40.5	Highly soluble	2.4	45200	251	Soluble	Low	No	Yes	No	No	No	No	No	-9.88	0	2	0	0	2	0.55	0	0	1	3.98
ZINC3830889	OC[C@H]1O[C@@H](O)[C@H]([C@H]([C@@H]1O)O)[NH3+]	C6H14NO5+	180.18	12	0	1	1	5	5	38.54	117.79	0.65	-3.5	-3.97	-6.44	-2.54	-3.16	1.31	3710	20.6	Highly soluble	1.61	7290	40.5	Highly soluble	2.4	45200	251	Soluble	Low	No	Yes	No	No	No	No	No	-9.88	0	2	0	0	2	0.55	0	0	1	3.98
ZINC3830890	OC[C@@H]1O[C@@H](O)[C@H]([C@H]([C@@H]1O)O)[NH3+]	C6H14NO5+	180.18	12	0	1	1	5	5	38.54	117.79	0.29	-3.5	-3.97	-6.44	-2.54	-3.23	1.31	3710	20.6	Highly soluble	1.61	7290	40.5	Highly soluble	2.4	45200	251	Soluble	Low	No	Yes	No	No	No	No	No	-9.88	0	2	0	0	2	0.55	0	0	1	3.98
ZINC3830892	SC[C@H](C(=O)NCC(=O)[O-])NC(=O)CC[C@@H](C(=O)[O-])[NH3+]	C10H16N3O6S-	306.32	20	0	0.6	11	6	3	67.74	204.9	0.45	-4.5	-5.59	-5.51	-1.37	-3.31	1.82	20300	66.4	Highly soluble	0.82	2000	6.54	Highly soluble	-0.08	253	0.826	Soluble	Low	No	No	No	No	No	No	No	-11.36	0	1	2	1	2	0.11	0	1	1	3.03
ZINC3830894	SC[C@H](C(=O)NCC(=O)[O-])NC(=O)CC[C@H](C(=O)[O-])[NH3+]	C10H16N3O6S-	306.32	20	0	0.6	11	6	3	67.74	204.9	0.12	-4.5	-5.59	-5.51	-1.37	-3.37	1.82	20300	66.4	Highly soluble	0.82	2000	6.54	Highly soluble	-0.08	253	0.826	Soluble	Low	No	No	No	No	No	No	No	-11.36	0	1	2	1	2	0.11	0	1	1	3.03
ZINC3830895	OC[C@@H](COP(=O)([O-])[O-])O	C3H7O6P--	170.06	10	0	1	4	6	2	27.87	122.69	-0.84	-2.86	-0.67	-2.53	-1.39	-1.66	1.17	2520	14.8	Highly soluble	0.84	1180	6.92	Highly soluble	1.81	10900	64.3	Soluble	High	No	No	No	No	No	No	No	-9.37	0	3	0	0	3	0.56	0	1	1	3.89
ZINC3830896	OC[C@H](COP(=O)([O-])[O-])O	C3H7O6P--	170.06	10	0	1	4	6	2	27.87	122.69	-0.3	-2.86	-0.67	-2.53	-1.39	-1.55	1.17	2520	14.8	Highly soluble	0.84	1180	6.92	Highly soluble	1.81	10900	64.3	Soluble	High	No	No	No	No	No	No	No	-9.37	0	3	0	0	3	0.56	0	1	1	3.89
ZINC3830899	O=C(C[C@@](c1ccccc1)(C1CCCC1)O)O[C@H]1CC[N+](C1)(C)C	C20H30NO3+	332.46	24	6	0.65	6	3	1	99.87	46.53	-0.35	2.8	2.36	-0.97	0.54	0.87	-3.45	0.117	0.000351	Soluble	-3.43	0.122	0.000368	Soluble	-4.8	0.00524	1.58e-05	Moderately soluble	High	Yes	Yes	No	No	No	No	No	-6.34	0	0	0	0	0	0.55	0	1	0	3.65
ZINC3830900	O=C(C[C@@](c1ccccc1)(C1CCCC1)O)O[C@@H]1CC[N+](C1)(C)C	C20H30NO3+	332.46	24	6	0.65	6	3	1	99.87	46.53	-0.49	2.8	2.36	-0.97	0.54	0.85	-3.45	0.117	0.000351	Soluble	-3.43	0.122	0.000368	Soluble	-4.8	0.00524	1.58e-05	Moderately soluble	High	Yes	Yes	No	No	No	No	No	-6.34	0	0	0	0	0	0.55	0	1	0	3.65
ZINC3830902	O=C(C[C@](c1ccccc1)(C1CCCC1)O)O[C@@H]1CC[N+](C1)(C)C	C20H30NO3+	332.46	24	6	0.65	6	3	1	99.87	46.53	-0.52	2.8	2.36	-0.97	0.54	0.84	-3.45	0.117	0.000351	Soluble	-3.43	0.122	0.000368	Soluble	-4.8	0.00524	1.58e-05	Moderately soluble	High	Yes	Yes	No	No	No	No	No	-6.34	0	0	0	0	0	0.55	0	1	0	3.65
ZINC3830916	OCc1ccc(c2c1sc1ccccc1c2=O)NCC[NH+](CC)CC	C20H25N2O2S+	357.49	25	14	0.35	7	2	3	109.22	82.01	3.52	2.7	1.9	-1.38	4.96	2.34	-3.71	0.0697	0.000195	Soluble	-4.08	0.0301	8.41e-05	Moderately soluble	-6.91	4.4e-05	1.23e-07	Poorly soluble	High	No	Yes	Yes	No	No	No	No	-6.56	0	0	0	0	0	0.55	0	1	1	3.08
ZINC3830922	O[C@@H]1[C@H]([NH3+])C[C@@H](O[C@@H]1C)O[C@@H]1C[C@@](O)(Cc2c1c(O)c1c(c2O)C(=O)c2c(C1=O)cccc2)C(=O)C	C26H28NO9+	498.5	36	12	0.42	3	9	5	126.27	178.23	2.8	1.86	-0.02	-4.74	1.69	0.32	-4.15	0.0352	7.06e-05	Moderately soluble	-5.22	0.00298	5.97e-06	Moderately soluble	-3.95	0.0565	0.000113	Soluble	Low	No	Yes	No	No	No	No	No	-8.02	0	1	1	1	1	0.55	1	1	1	5.67
ZINC3830923	O[C@@H]1[C@H]([NH3+])C[C@@H](O[C@H]1C)O[C@@H]1C[C@@](O)(Cc2c1c(O)c1c(c2O)C(=O)c2c(C1=O)cccc2)C(=O)C	C26H28NO9+	498.5	36	12	0.42	3	9	5	126.27	178.23	2.75	1.86	-0.02	-4.74	1.69	0.31	-4.15	0.0352	7.06e-05	Moderately soluble	-5.22	0.00298	5.97e-06	Moderately soluble	-3.95	0.0565	0.000113	Soluble	Low	No	Yes	No	No	No	No	No	-8.02	0	1	1	1	1	0.55	1	1	1	5.67
ZINC3830925	O[C@H]1[C@H]([NH3+])C[C@@H](O[C@H]1C)O[C@@H]1C[C@@](O)(Cc2c1c(O)c1c(c2O)C(=O)c2c(C1=O)cccc2)C(=O)C	C26H28NO9+	498.5	36	12	0.42	3	9	5	126.27	178.23	2.14	1.86	-0.02	-4.74	1.69	0.19	-4.15	0.0352	7.06e-05	Moderately soluble	-5.22	0.00298	5.97e-06	Moderately soluble	-3.95	0.0565	0.000113	Soluble	Low	No	Yes	No	No	No	No	No	-8.02	0	1	1	1	1	0.55	1	1	1	5.67
ZINC3830927	[O-]C(=O)C1=C(C[C@@H]2N1C(=O)[C@@H]2[C@H](O)C)SCCNC=[NH2+]	C12H17N3O4S	299.35	20	0	0.58	7	4	3	77.75	143.59	1.02	-0.32	-3.71	0.28	-0.16	-0.58	-1.03	27.8	0.0928	Very soluble	-2.23	1.74	0.00583	Soluble	-0.56	81.7	0.273	Soluble	Low	No	No	No	No	No	No	No	-8.35	0	1	1	1	0	0.55	0	2	0	4.51
ZINC3830932	C[C@@H](C(=O)[O-])CN(c1c(I)cc(c(c1I)N)I)C(=O)C	C12H12I3N2O3-	612.95	20	6	0.33	5	3	1	102.46	86.46	2.01	2.62	1.83	3.48	3.46	2.68	-5.18	0.00402	6.56e-06	Moderately soluble	-4.09	0.0503	8.21e-05	Moderately soluble	-4.45	0.0215	3.52e-05	Moderately soluble	High	No	No	No	No	No	No	No	-8.18	1	1	0	0	1	0.56	0	2	1	2.79
ZINC3830942	Ic1cc(I)c2c(c1O)nccc2	C9H5I2NO	396.95	13	10	0	0	2	1	69.2	33.12	2.24	3.92	3.15	2.87	3.86	3.21	-5.34	0.00181	4.57e-06	Moderately soluble	-4.31	0.0192	4.85e-05	Moderately soluble	-4.95	0.00445	1.12e-05	Moderately soluble	High	Yes	No	Yes	Yes	Yes	No	No	-5.94	0	1	0	0	0	0.55	0	1	2	2.04
ZINC3830950	CC[C@@H](C(=O)[O-])Cc1c(I)cc(c(c1I)N)I	C11H11I3NO2-	569.92	17	6	0.36	4	2	1	93.02	66.15	2.5	3.88	2.41	4.33	4.69	3.56	-5.82	0.000872	1.53e-06	Moderately soluble	-4.97	0.00615	1.08e-05	Moderately soluble	-5.24	0.00326	5.71e-06	Moderately soluble	High	Yes	No	Yes	No	No	No	No	-7.02	2	1	0	0	0	0.85	0	2	2	2.41
ZINC3830955	CCOC(=O)CCCCCCCC[C@H](c1ccc(cc1)I)C	C19H29IO2	416.34	22	6	0.63	12	2	0	103.09	26.3	4.39	6.96	6.08	5.33	6.76	5.91	-6.22	0.000253	6.08e-07	Poorly soluble	-7.33	1.97e-05	4.72e-08	Poorly soluble	-7.41	1.62e-05	3.9e-08	Poorly soluble	High	No	No	No	No	Yes	No	No	-3.9	1	1	1	1	1	0.55	0	1	3	3.3
ZINC3830967	[O-][N+](=O)O[C@@H]1CO[C@@H]2[C@H]1OC[C@@H]2O	C6H9NO6	191.14	13	0	1	2	6	1	39.25	93.74	0.84	-0.4	-1.28	-2.01	-2.54	-1.08	-0.64	43.7	0.229	Very soluble	-1.1	15	0.0786	Very soluble	1.35	4300	22.5	Soluble	High	No	No	No	No	No	No	No	-7.75	0	2	0	0	1	0.55	0	2	1	4.27
ZINC3830969	C[C@H]([NH2+][C@H]([C@@H](c1ccc(cc1)O)O)C)COc1ccccc1	C18H24NO3+	302.39	22	12	0.33	7	3	3	88.7	66.3	2.83	2.82	1.52	-1.48	2.86	1.71	-3.43	0.112	0.000369	Soluble	-3.87	0.0408	0.000135	Soluble	-4.87	0.00408	1.35e-05	Moderately soluble	High	Yes	Yes	No	No	No	No	No	-6.14	0	0	0	0	0	0.55	0	0	0	3.07
ZINC3830971	C[C@H]([NH2+][C@@H]([C@@H](c1ccc(cc1)O)O)C)COc1ccccc1	C18H24NO3+	302.39	22	12	0.33	7	3	3	88.7	66.3	2.84	2.82	1.52	-1.48	2.86	1.71	-3.43	0.112	0.000369	Soluble	-3.87	0.0408	0.000135	Soluble	-4.87	0.00408	1.35e-05	Moderately soluble	High	Yes	Yes	No	No	No	No	No	-6.14	0	0	0	0	0	0.55	0	0	0	3.07
ZINC3830972	COC(=O)C1C(=NC(=C([C@H]1c1cccc2c1non2)C(=O)OC(C)C)C)C	C19H21N3O5	371.39	27	9	0.42	6	8	0	101.45	103.88	3.61	2.09	2.41	1.83	3.28	2.65	-3.31	0.182	0.00049	Soluble	-3.9	0.0466	0.000125	Soluble	-4.78	0.00615	1.66e-05	Moderately soluble	High	No	No	No	Yes	No	No	Yes	-7.08	0	0	0	0	0	0.55	0	1	1	4.62
ZINC3830974	CC[C@@H](n1ncn(c1=O)c1ccc(cc1)N1CCN(CC1)c1ccc(cc1)OC[C@@H]1CO[C@@](O1)(Cn1cncn1)c1ccc(cc1Cl)Cl)C	C35H38Cl2N8O4	705.63	49	28	0.37	11	7	0	194.53	104.7	5.42	5.66	4.71	4.21	3.7	4.74	-7.48	2.35e-05	3.33e-08	Poorly soluble	-7.62	1.68e-05	2.38e-08	Poorly soluble	-9.24	4.1e-07	5.81e-10	Poorly soluble	High	No	Yes	Yes	Yes	Yes	Yes	Yes	-6.59	3	3	1	0	2	0.17	2	0	3	5.77
ZINC3830976	CC[C@@H](n1ncn(c1=O)c1ccc(cc1)N1CCN(CC1)c1ccc(cc1)OC[C@H]1CO[C@@](O1)(Cn1cncn1)c1ccc(cc1Cl)Cl)C	C35H38Cl2N8O4	705.63	49	28	0.37	11	7	0	194.53	104.7	5.52	5.66	4.71	4.21	3.7	4.76	-7.48	2.35e-05	3.33e-08	Poorly soluble	-7.62	1.68e-05	2.38e-08	Poorly soluble	-9.24	4.1e-07	5.81e-10	Poorly soluble	High	No	Yes	Yes	Yes	Yes	Yes	Yes	-6.59	3	3	1	0	2	0.17	2	0	3	5.77
ZINC3830983	OC[C@@H]1O[C@H](O)[C@@H]([C@@H]([C@@H]1O[C@@H]1O[C@@H](CO)[C@@H]([C@@H]([C@@H]1O)O)O)O)O	C12H22O11	342.3	23	0	1	4	11	8	68.12	189.53	-0.64	-3.57	-5.4	-4.37	-4.4	-3.67	0.55	1220	3.56	Highly soluble	0.17	510	1.49	Highly soluble	4.25	6100000	17800	Soluble	Low	No	Yes	No	No	No	No	No	-10.92	2	1	1	1	4	0.17	0	0	0	5.41
ZINC3830985	OC[C@@H]1O[C@H](O)[C@@H]([C@@H]([C@@H]1O[C@@H]1O[C@@H](CO)[C@H]([C@@H]([C@@H]1O)O)O)O)O	C12H22O11	342.3	23	0	1	4	11	8	68.12	189.53	-0.16	-3.57	-5.4	-4.37	-4.4	-3.58	0.55	1220	3.56	Highly soluble	0.17	510	1.49	Highly soluble	4.25	6100000	17800	Soluble	Low	No	Yes	No	No	No	No	No	-10.92	2	1	1	1	4	0.17	0	0	0	5.41
ZINC3830998	CCC[C@@H]1C[NH+]([C@@H](C1)C(=O)N[C@@H]([C@H]1O[C@@H](SC)[C@H]([C@H]([C@H]1O)O)O)[C@H](O)C)C	C18H35N2O6S+	407.55	27	0	0.94	8	6	6	108.51	148.99	2.43	0.2	-2.65	-4.77	-0.47	-1.05	-1.96	4.42	0.0108	Very soluble	-2.89	0.528	0.0013	Soluble	-0.02	386	0.946	Soluble	Low	No	Yes	No	No	No	No	No	-8.64	1	1	1	1	1	0.55	0	0	2	5.64
ZINC3831004	O[C@H](c1ccccc1)C[C@H]1CCC[C@@H]([NH+]1C)CC(=O)c1ccccc1	C22H28NO2+	338.46	25	12	0.41	6	2	2	106.4	41.74	2.98	3.76	2.11	-0.74	4.01	2.43	-4.27	0.0183	5.41e-05	Moderately soluble	-4.33	0.0158	4.68e-05	Moderately soluble	-5.76	0.000581	1.72e-06	Moderately soluble	High	Yes	Yes	Yes	No	No	No	No	-5.7	0	0	0	0	0	0.55	0	0	1	3.41
ZINC3831012	CC[NH+](CCNc1ccc(c2c1c(=O)c1c(s2)cccc1)C)CC	C20H25N2OS+	341.49	24	14	0.35	6	1	2	108.06	61.78	3.82	3.95	2.87	-0.53	5.56	3.13	-4.48	0.0113	3.3e-05	Moderately soluble	-4.95	0.00385	1.13e-05	Moderately soluble	-7.48	1.14e-05	3.33e-08	Poorly soluble	High	Yes	No	Yes	No	Yes	No	No	-5.58	0	0	0	0	0	0.55	0	1	1	2.94
ZINC3831025	C[NH2+][C@]1(C)[C@H]2CC[C@@H](C1(C)C)C2	C11H22N+	168.3	12	0	1	1	0	1	54.6	16.61	2.7	2.55	1.39	-0.94	2.44	1.63	-2.42	0.634	0.00377	Soluble	-2.55	0.479	0.00284	Soluble	-2.93	0.199	0.00118	Soluble	High	Yes	No	No	No	No	No	No	-5.52	0	0	0	0	2	0.55	0	0	1	3.2
ZINC3831029	C[NH2+]C[C@H]([C@@H]([C@@H]([C@@H](CO)O)O)O)O	C7H18NO5+	196.22	13	0	1	6	5	6	45.63	117.76	1.17	-2.85	-4.38	-6.1	-1.72	-2.78	1.13	2680	13.6	Highly soluble	0.93	1680	8.58	Highly soluble	1.55	6930	35.3	Soluble	Low	No	No	No	No	No	No	No	-9.52	1	1	0	0	3	0.55	0	0	1	3.17
ZINC3831044	C#C[C@@]1(O)CC[C@@H]2[C@]1(C)CC[C@H]1[C@@H]2CCc2c1ccc(c2)OC	C21H26O2	310.43	23	6	0.62	1	2	1	93.31	29.46	3.41	4	4	4.13	4.47	4	-4.41	0.012	3.88e-05	Moderately soluble	-4.32	0.0148	4.78e-05	Moderately soluble	-4.74	0.00567	1.83e-05	Moderately soluble	High	Yes	No	No	No	Yes	Yes	No	-5.35	0	0	0	0	0	0.55	0	1	1	4.11
ZINC3831045	C#C[C@@]1(O)CC[C@@H]2[C@@]1(C)CC[C@@H]1[C@@H]2CCc2c1ccc(c2)OC	C21H26O2	310.43	23	6	0.62	1	2	1	93.31	29.46	3.38	4	4	4.13	4.47	3.99	-4.41	0.012	3.88e-05	Moderately soluble	-4.32	0.0148	4.78e-05	Moderately soluble	-4.74	0.00567	1.83e-05	Moderately soluble	High	Yes	No	No	No	Yes	Yes	No	-5.35	0	0	0	0	0	0.55	0	1	1	4.11
ZINC3831059	O=C1C=C[C@@]2(C(=C1)CC[C@H]1[C@H]2CC[C@]2([C@H]1CC[C@@]2(C)O)C)C	C20H28O2	300.44	22	0	0.75	0	2	1	89.73	37.3	3.07	3.57	4.05	3.73	3.66	3.61	-3.95	0.0336	0.000112	Soluble	-4.04	0.0275	9.14e-05	Moderately soluble	-3.62	0.0726	0.000242	Soluble	High	Yes	No	No	No	Yes	No	No	-5.6	0	0	0	0	0	0.55	0	0	1	4.91
ZINC3831061	O=C1C=C[C@@]2(C(=C1)CC[C@H]1[C@@H]2CC[C@]2([C@H]1CC[C@@]2(C)O)C)C	C20H28O2	300.44	22	0	0.75	0	2	1	89.73	37.3	3.01	3.57	4.05	3.73	3.66	3.6	-3.95	0.0336	0.000112	Soluble	-4.04	0.0275	9.14e-05	Moderately soluble	-3.62	0.0726	0.000242	Soluble	High	Yes	No	No	No	Yes	No	No	-5.6	0	0	0	0	0	0.55	0	0	1	4.91
ZINC3831068	CC[C@@H](NC(=O)[C@H]1C[NH+](C)[C@H]2C(=C1)c1cccc3c1c(C2)c[nH]3)CO	C20H26N3O2+	340.44	25	9	0.45	5	2	4	104.33	69.56	2.54	2.31	0.13	-2.18	2.68	1.1	-3.34	0.155	0.000455	Soluble	-3.41	0.133	0.00039	Soluble	-4.59	0.00865	2.54e-05	Moderately soluble	High	No	Yes	No	No	No	No	No	-6.74	0	0	0	0	0	0.55	0	0	0	4.54
ZINC3831070	COc1cccc(c1C(=O)N[C@@H]1C(=O)N2[C@@H]1SC([C@@H]2C(=O)[O-])(C)C)OC	C17H19N2O6S-	379.41	26	6	0.47	6	6	1	96.31	133.3	1.86	1.22	-0.77	1.01	0.78	0.82	-2.74	0.697	0.00184	Soluble	-3.62	0.0918	0.000242	Soluble	-2.75	0.669	0.00176	Soluble	High	No	No	No	No	No	No	No	-7.75	0	1	0	1	0	0.56	0	0	1	4.05
ZINC3831089	OCC(=O)[C@@]1(O)CC[C@@H]2[C@@]1(C)C[C@H](O)[C@H]1[C@H]2C[C@@H](C2=CC(=O)C=C[C@]12C)C	C22H30O5	374.47	27	0	0.73	2	5	3	101.87	94.83	2.67	1.95	1.8	1.52	2.18	2.02	-3.26	0.207	0.000552	Soluble	-3.57	0.102	0.000272	Soluble	-2.31	1.82	0.00486	Soluble	High	No	Yes	No	No	No	No	No	-7.2	0	0	0	0	0	0.55	0	0	1	5.42
ZINC3831090	CCC(=O)O[C@@]1(CC[C@@H]2[C@]1(C)C[C@H](O)[C@@H]1[C@@H]2C[C@@H](C2=CC(=O)C=C[C@@]12C)C)C(=O)COC(=O)C	C27H36O7	472.57	34	0	0.7	7	7	1	126.15	106.97	3.17	3.77	3.34	2.4	3.6	3.26	-4.68	0.0098	2.07e-05	Moderately soluble	-5.71	0.000922	1.95e-06	Moderately soluble	-3.93	0.0555	0.000117	Soluble	High	No	Yes	No	No	No	No	Yes	-6.51	0	0	0	0	0	0.55	0	1	2	5.79
ZINC3831092	CCC(=O)O[C@@]1(CC[C@H]2[C@]1(C)C[C@H](O)[C@@H]1[C@@H]2C[C@@H](C2=CC(=O)C=C[C@@]12C)C)C(=O)COC(=O)C	C27H36O7	472.57	34	0	0.7	7	7	1	126.15	106.97	2.81	3.77	3.34	2.4	3.6	3.18	-4.68	0.0098	2.07e-05	Moderately soluble	-5.71	0.000922	1.95e-06	Moderately soluble	-3.93	0.0555	0.000117	Soluble	High	No	Yes	No	No	No	No	Yes	-6.51	0	0	0	0	0	0.55	0	1	2	5.79
ZINC3831093	CCC(=O)O[C@]1(CC[C@H]2[C@]1(C)C[C@H](O)[C@@H]1[C@@H]2C[C@@H](C2=CC(=O)C=C[C@@]12C)C)C(=O)COC(=O)C	C27H36O7	472.57	34	0	0.7	7	7	1	126.15	106.97	3.09	3.77	3.34	2.4	3.6	3.24	-4.68	0.0098	2.07e-05	Moderately soluble	-5.71	0.000922	1.95e-06	Moderately soluble	-3.93	0.0555	0.000117	Soluble	High	No	Yes	No	No	No	No	Yes	-6.51	0	0	0	0	0	0.55	0	1	2	5.79
ZINC3831096	CC(=O)OCC(=O)[C@@]1(O)CC[C@@H]2[C@@]1(C)C[C@H](O)[C@H]1[C@H]2C[C@H](C2=CC(=O)C=C[C@]12C)C	C24H32O6	416.51	30	0	0.71	4	6	2	111.6	100.9	2.71	2.73	2.37	1.86	2.68	2.47	-3.88	0.0551	0.000132	Soluble	-4.5	0.0131	3.14e-05	Moderately soluble	-2.93	0.49	0.00118	Soluble	High	No	Yes	No	No	No	No	No	-6.9	0	0	0	0	0	0.55	0	0	1	5.44
ZINC3831107	CCC1(CC)C(=O)NC[C@@H](C1=O)C	C10H17NO2	183.25	13	0	0.8	2	2	1	54.93	46.17	1.88	0.78	0.75	0.79	2.05	1.25	-1.34	8.46	0.0462	Very soluble	-1.33	8.57	0.0468	Very soluble	-2.83	0.273	0.00149	Soluble	High	Yes	No	No	No	No	No	No	-6.86	0	0	0	0	1	0.55	0	1	1	1.92
ZINC3831116	CC(=O)Nc1c(I)c(N(C(=O)C)C)c(c(c1I)C(=O)[O-])I	C12H10I3N2O4-	626.93	21	6	0.25	5	4	1	103.14	89.54	1.85	1.93	1.61	3.26	3.42	2.41	-4.82	0.0094	1.5e-05	Moderately soluble	-3.43	0.231	0.000368	Soluble	-4.73	0.0117	1.87e-05	Moderately soluble	High	No	No	No	No	No	No	Yes	-8.75	1	1	0	0	1	0.56	0	1	1	2.52
ZINC3831123	COCC(=O)O[C@]1(CC[NH+](CCCc2nc3c([nH]2)cccc3)C)CCc2c([C@H]1C(C)C)ccc(c2)F	C29H39FN3O3+	496.64	36	15	0.52	12	5	2	142.22	68.65	4.24	5.76	4.27	0.17	6.63	4.21	-6.06	0.000428	8.62e-07	Poorly soluble	-6.97	5.32e-05	1.07e-07	Poorly soluble	-9.19	3.18e-07	6.41e-10	Poorly soluble	High	Yes	Yes	No	Yes	No	No	Yes	-5.24	0	3	1	0	1	0.55	0	0	3	4.95
ZINC3831125	COCC(=O)O[C@@]1(CC[NH+](CCCc2nc3c([nH]2)cccc3)C)CCc2c([C@@H]1C(C)C)ccc(c2)F	C29H39FN3O3+	496.64	36	15	0.52	12	5	2	142.22	68.65	3.68	5.76	4.27	0.17	6.63	4.1	-6.06	0.000428	8.62e-07	Poorly soluble	-6.97	5.32e-05	1.07e-07	Poorly soluble	-9.19	3.18e-07	6.41e-10	Poorly soluble	High	Yes	Yes	No	Yes	No	No	Yes	-5.24	0	3	1	0	1	0.55	0	0	3	4.95
ZINC3831129	CC#C[C@]1(O)CC[C@H]2[C@]1(C)C[C@H](c1ccc(cc1)N(C)C)C1=C3CCC(=O)C=C3CC[C@@H]21	C29H35NO2	429.59	32	6	0.55	2	2	1	131.65	40.54	4	3.77	5.49	4.65	5.28	4.64	-4.89	0.00559	1.3e-05	Moderately soluble	-4.31	0.0208	4.85e-05	Moderately soluble	-6.3	0.000217	5.06e-07	Poorly soluble	High	Yes	No	No	No	No	No	Yes	-6.24	1	1	0	0	0	0.55	1	1	2	5.38
ZINC3831134	OCC[NH+]1C[C@@H](O)[C@H]([C@@H]([C@@H]1CO)O)O	C8H18NO5+	208.23	14	0	1	3	5	6	52.04	105.59	0.92	-2.57	-5.06	-6.16	-2.15	-3	0.69	1010	4.85	Highly soluble	0.9	1650	7.91	Highly soluble	1.97	19500	93.5	Soluble	Low	No	Yes	No	No	No	No	No	-9.39	1	1	0	0	2	0.55	0	0	1	3.32
ZINC3831136	CCCC[C@@](C/C=C/[C@@H]1[C@H](O)CC(=O)[C@@H]1CCCCCCC(=O)OC)(O)C	C22H38O5	382.53	27	0	0.82	14	5	2	109.13	83.83	3.8	3.66	3.95	2.42	4.94	3.75	-3.59	0.0975	0.000255	Soluble	-5.11	0.00297	7.77e-06	Moderately soluble	-4.29	0.0197	5.14e-05	Moderately soluble	High	No	Yes	No	No	No	Yes	No	-6.03	0	0	1	0	0	0.55	0	1	3	5.02
ZINC3831150	[O-]C(=O)CC1(CS[C@H](c2cccc(c2)/C=C/c2ccc3c(n2)cc(cc3)Cl)CCc2ccccc2C(O)(C)C)CC1	C35H35ClNO3S-	585.18	41	22	0.31	12	4	1	170.7	98.55	5.03	7.72	6.9	5.7	9.38	6.95	-7.94	6.77e-06	1.16e-08	Poorly soluble	-9.63	1.37e-07	2.33e-10	Poorly soluble	-11.38	2.47e-09	4.22e-12	Insoluble	Low	No	Yes	No	No	No	Yes	Yes	-4.39	2	4	1	1	1	0.56	0	0	3	4.7
ZINC3831159	CO[C@]1(NC(=O)[C@@H](c2ccc(cc2)O)C(=O)[O-])C(=O)N2[C@@H]1OCC(=C2C(=O)[O-])CSc1nnnn1C	C20H18N6O9S--	518.46	36	11	0.35	10	12	2	117.36	237.26	0.92	-0.58	-4.18	-0.54	-1.73	-1.22	-2.26	2.88	0.00556	Soluble	-3.93	0.0607	0.000117	Soluble	-1.59	13.4	0.0259	Soluble	Low	No	No	No	No	No	No	No	-9.87	2	2	1	1	2	0.11	0	2	2	5.08
ZINC3831164	CCCCCCC(c1cc(O)c2c(c1)OC([C@@H]1[C@H]2CC(=O)CC1)(C)C)(C)C	C24H36O3	372.54	27	6	0.71	6	3	1	112.89	46.53	4.01	7.44	6.26	4.16	6.28	5.63	-6.61	9.24e-05	2.48e-07	Poorly soluble	-8.25	2.1e-06	5.64e-09	Poorly soluble	-6.87	5.01e-05	1.35e-07	Poorly soluble	High	No	Yes	No	No	No	Yes	Yes	-3.29	1	1	0	1	1	0.55	0	0	2	4.35
ZINC3831166	O[C@@H](C[NH2+]C(C)(C)C)COc1cccc2c1C[C@@H](O)[C@@H](C2)O	C17H28NO4+	310.41	22	6	0.65	6	4	4	86.79	86.53	2.42	0.71	-0.39	-2.95	1.85	0.33	-2.02	2.98	0.0096	Soluble	-2.11	2.44	0.00785	Soluble	-3.17	0.212	0.000682	Soluble	High	No	Yes	No	No	No	No	No	-7.69	0	0	0	0	0	0.55	0	0	0	3.95
ZINC3831171	CC[NH+](CCOC(=O)[C@@H](Cc1cccc2c1cccc2)C[C@@H]1CCCO1)CC	C24H34NO3+	384.53	28	10	0.54	11	3	1	115.81	39.97	4.17	4.83	3.04	-0.31	5.29	3.4	-4.81	0.00602	1.57e-05	Moderately soluble	-5.4	0.00152	3.96e-06	Moderately soluble	-6.9	4.8e-05	1.25e-07	Poorly soluble	High	Yes	No	No	No	No	Yes	No	-5.22	0	0	1	0	0	0.55	0	0	3	3.95
ZINC3831185	O=C1CC[C@@H]2C(=C1)CC[C@H]1[C@@H]2CC[C@]2([C@H]1CC[C@@H]2O)C	C18H26O2	274.4	20	0	0.83	0	2	1	80.81	37.3	2.77	2.62	3.49	3.36	3.1	3.07	-3.19	0.176	0.000643	Soluble	-3.05	0.243	0.000885	Soluble	-2.88	0.36	0.00131	Soluble	High	Yes	No	No	No	No	No	No	-6.11	0	0	0	0	0	0.55	0	0	0	4.51
ZINC3831191	O=C(O[C@H]1CC[C@@H]2[C@]1(C)CC[C@@H]1[C@@H]2CCC2=CC(=O)CC[C@@H]12)CCc1ccccc1	C27H34O3	406.56	30	6	0.63	5	3	0	119.84	43.37	3.68	5.08	5.67	4.88	5.39	4.94	-5.38	0.0017	4.18e-06	Moderately soluble	-5.73	0.000751	1.85e-06	Moderately soluble	-6.39	0.000166	4.07e-07	Poorly soluble	High	Yes	No	No	No	Yes	Yes	Yes	-5.17	1	1	0	0	1	0.55	0	0	2	4.81
ZINC3831193	O=C(O[C@H]1CC[C@@H]2[C@]1(C)CC[C@H]1[C@@H]2CCC2=CC(=O)CC[C@@H]12)CCc1ccccc1	C27H34O3	406.56	30	6	0.63	5	3	0	119.84	43.37	4.02	5.08	5.67	4.88	5.39	5.01	-5.38	0.0017	4.18e-06	Moderately soluble	-5.73	0.000751	1.85e-06	Moderately soluble	-6.39	0.000166	4.07e-07	Poorly soluble	High	Yes	No	No	No	Yes	Yes	Yes	-5.17	1	1	0	0	1	0.55	0	0	2	4.81
ZINC3831198	COC(=O)C1C(=NC(=C([C@H]1c1cccc(c1)[N+](=O)[O-])C(=O)OCC[NH+](Cc1ccccc1)C)C)C	C26H30N3O6+	480.53	35	12	0.35	11	7	1	138.35	115.22	3.66	3.4	1.94	-0.04	2.71	2.33	-4.49	0.0156	3.24e-05	Moderately soluble	-5.5	0.00152	3.17e-06	Moderately soluble	-6.55	0.000136	2.84e-07	Poorly soluble	High	No	No	No	No	Yes	No	Yes	-6.82	0	2	1	0	0	0.55	0	3	2	5.26
ZINC3831217	C#C[C@@]1(O)CC[C@@H]2[C@@]1(C)CC[C@H]1[C@@H]2CCC2=CC(=O)CC[C@@H]12	C20H26O2	298.42	22	0	0.75	0	2	1	88.63	37.3	2.86	2.97	3.57	3.73	3.78	3.38	-3.56	0.0819	0.000275	Soluble	-3.42	0.114	0.000383	Soluble	-3.17	0.199	0.000668	Soluble	High	Yes	No	No	No	Yes	No	No	-6.01	0	0	0	0	0	0.55	0	1	0	5.01
ZINC3831218	C#C[C@@]1(O)CC[C@@H]2[C@]1(C)CC[C@H]1[C@@H]2CCC2=CC(=O)CC[C@@H]12	C20H26O2	298.42	22	0	0.75	0	2	1	88.63	37.3	2.85	2.97	3.57	3.73	3.78	3.38	-3.56	0.0819	0.000275	Soluble	-3.42	0.114	0.000383	Soluble	-3.17	0.199	0.000668	Soluble	High	Yes	No	No	No	Yes	No	No	-6.01	0	0	0	0	0	0.55	0	1	0	5.01
ZINC3831219	C#C[C@]1(CC[C@@H]2[C@]1(C)CC[C@@H]1[C@@H]2CCC2=CC(=O)CC[C@@H]12)OC(=O)C	C22H28O3	340.46	25	0	0.73	2	3	0	98.36	43.37	3.42	3.64	4.14	4.01	4.24	3.89	-4.11	0.0263	7.73e-05	Moderately soluble	-4.24	0.0196	5.77e-05	Moderately soluble	-3.8	0.0536	0.000157	Soluble	High	Yes	No	No	No	Yes	No	No	-5.79	0	0	0	0	0	0.55	0	1	1	5.08
ZINC3831221	C#C[C@]1(CC[C@H]2[C@]1(C)CC[C@@H]1[C@@H]2CCC2=CC(=O)CC[C@@H]12)OC(=O)C	C22H28O3	340.46	25	0	0.73	2	3	0	98.36	43.37	3.45	3.64	4.14	4.01	4.24	3.9	-4.11	0.0263	7.73e-05	Moderately soluble	-4.24	0.0196	5.77e-05	Moderately soluble	-3.8	0.0536	0.000157	Soluble	High	Yes	No	No	No	Yes	No	No	-5.79	0	0	0	0	0	0.55	0	1	1	5.08
ZINC3831223	C#C[C@@]1(O)CC[C@@H]2[C@@]1(C)CC[C@@H]1[C@@H]2CCC2=C1CCC(=O)C2	C20H26O2	298.42	22	0	0.75	0	2	1	88.63	37.3	3.02	2.11	3.72	3.73	4.18	3.35	-3.02	0.285	0.000956	Soluble	-2.52	0.893	0.00299	Soluble	-3.62	0.0708	0.000237	Soluble	High	Yes	Yes	No	No	Yes	No	No	-6.62	0	0	0	0	0	0.55	0	2	0	5.14
ZINC3831225	C#C[C@@]1(O)CC[C@@H]2[C@@]1(C)CC[C@H]1[C@@H]2CCC2=C1CCC(=O)C2	C20H26O2	298.42	22	0	0.75	0	2	1	88.63	37.3	2.88	2.11	3.72	3.73	4.18	3.32	-3.02	0.285	0.000956	Soluble	-2.52	0.893	0.00299	Soluble	-3.62	0.0708	0.000237	Soluble	High	Yes	Yes	No	No	Yes	No	No	-6.62	0	0	0	0	0	0.55	0	2	0	5.14
ZINC3831235	C[C@H]([NH2+][C@H]([C@@H](c1ccc(cc1)O)O)C)CCc1ccccc1	C19H26NO2+	300.42	22	12	0.37	7	2	3	91.98	57.07	3.1	3.46	2.07	-0.66	3.71	2.34	-3.82	0.0451	0.00015	Soluble	-4.34	0.0137	4.57e-05	Moderately soluble	-5.54	0.000876	2.92e-06	Moderately soluble	High	Yes	Yes	No	No	No	Yes	No	-5.68	0	0	0	0	0	0.55	0	0	0	2.98
ZINC3831243	[O-]C(=O)[C@H]1N2C(=O)[C@H]([C@@H]2SC1(C)C)NC(=O)c1c(C)onc1c1ccccc1	C19H18N3O5S-	400.43	28	11	0.37	5	6	1	103.79	140.87	2.11	2.38	0.18	1.56	1.59	1.56	-3.78	0.066	0.000165	Soluble	-4.98	0.0042	1.05e-05	Moderately soluble	-4.23	0.0237	5.93e-05	Moderately soluble	Low	No	No	No	Yes	No	No	Yes	-7.05	0	0	1	1	0	0.56	0	0	1	4.5
ZINC3831247	O=C1OC[C@]2([C@H](C1)CC[C@H]1[C@H]2CC[C@]2([C@H]1CC[C@@]2(C)O)C)C	C19H30O3	306.44	22	0	0.95	0	3	1	86.96	46.53	2.92	3.74	3.54	3.63	3.44	3.46	-4.1	0.0246	8.01e-05	Moderately soluble	-4.41	0.0119	3.9e-05	Moderately soluble	-3.56	0.084	0.000274	Soluble	High	Yes	No	No	No	Yes	No	No	-5.51	0	0	0	0	0	0.55	0	0	1	4.22
ZINC3831248	O=C1OC[C@]2([C@H](C1)CC[C@H]1[C@@H]2CC[C@@]2([C@H]1CC[C@@]2(C)O)C)C	C19H30O3	306.44	22	0	0.95	0	3	1	86.96	46.53	2.82	3.74	3.54	3.63	3.44	3.44	-4.1	0.0246	8.01e-05	Moderately soluble	-4.41	0.0119	3.9e-05	Moderately soluble	-3.56	0.084	0.000274	Soluble	High	Yes	No	No	No	Yes	No	No	-5.51	0	0	0	0	0	0.55	0	0	1	4.22
ZINC3831258	CC(=O)Oc1ccc(cc1)C1(c2ccc(cc2)OC(=O)C)C(=O)Nc2c1cccc2	C24H19NO5	401.41	30	18	0.12	6	5	1	113.59	81.7	3.25	3.45	3.25	3.34	4.44	3.55	-4.55	0.0113	2.82e-05	Moderately soluble	-4.85	0.00571	1.42e-05	Moderately soluble	-7.99	4.16e-06	1.04e-08	Poorly soluble	High	No	No	Yes	Yes	Yes	No	Yes	-6.3	0	0	0	0	0	0.55	0	1	1	2.59
ZINC3831271	OCC(=O)[C@]1(O)[C@@H](C)C[C@@H]2[C@]1(C)C[C@@H](O)[C@@H]1[C@H]2C[C@@H](C2=CC(=O)C=C[C@]12C)F	C22H29FO5	392.46	28	0	0.73	2	6	3	101.92	94.83	2.05	1.95	2.17	1.62	2.19	2	-3.37	0.168	0.000427	Soluble	-3.57	0.107	0.000272	Soluble	-2.35	1.76	0.00449	Soluble	High	No	Yes	No	No	No	No	No	-7.31	0	0	0	0	0	0.55	0	0	1	5.54
ZINC3831281	O=C(N[C@@H]1C(=O)N2[C@H]1SC([C@@H]2C(=O)[O-])(C)C)COc1ccccc1	C16H17N2O5S-	349.38	24	6	0.44	6	5	1	89.44	124.07	1.48	2.09	-1.02	1.02	0.57	0.83	-3.11	0.27	0.000773	Soluble	-4.33	0.0165	4.73e-05	Moderately soluble	-2.67	0.754	0.00216	Soluble	High	No	No	No	No	No	No	No	-6.95	0	1	0	0	0	0.56	0	0	0	4.05
ZINC3831296	CCC[NH+]1C[C@H](CSC)C[C@@H]2[C@@H]1Cc1c[nH]c3c1c2ccc3	C19H27N2S+	315.5	22	9	0.58	4	0	2	102.63	45.53	3.28	4.17	2.47	-0.09	4.43	2.85	-4.46	0.0109	3.45e-05	Moderately soluble	-4.83	0.00462	1.46e-05	Moderately soluble	-5.67	0.000676	2.14e-06	Moderately soluble	High	Yes	Yes	No	Yes	No	No	No	-5.26	0	0	0	0	0	0.55	0	0	1	3.96
ZINC3831297	CCC[NH+]1C[C@@H](CSC)C[C@@H]2[C@@H]1Cc1c[nH]c3c1c2ccc3	C19H27N2S+	315.5	22	9	0.58	4	0	2	102.63	45.53	3.05	4.17	2.47	-0.09	4.43	2.81	-4.46	0.0109	3.45e-05	Moderately soluble	-4.83	0.00462	1.46e-05	Moderately soluble	-5.67	0.000676	2.14e-06	Moderately soluble	High	Yes	Yes	No	Yes	No	No	No	-5.26	0	0	0	0	0	0.55	0	0	1	3.96
ZINC3831306	C[C@@H](C(=O)N[C@@H]1C(=O)N2[C@@H]1SC([C@H]2C(=O)[O-])(C)C)Oc1ccccc1	C17H19N2O5S-	363.41	25	6	0.47	6	5	1	94.25	124.07	1.97	2.2	-0.63	1.26	0.79	1.12	-3.26	0.199	0.000549	Soluble	-4.44	0.0132	3.63e-05	Moderately soluble	-2.69	0.747	0.00206	Soluble	High	No	No	No	No	No	No	No	-6.95	0	1	0	0	0	0.56	0	0	1	4.3
ZINC3831307	C[C@H](C(=O)N[C@@H]1C(=O)N2[C@@H]1SC([C@H]2C(=O)[O-])(C)C)Oc1ccccc1	C17H19N2O5S-	363.41	25	6	0.47	6	5	1	94.25	124.07	2.29	2.2	-0.63	1.26	0.79	1.18	-3.26	0.199	0.000549	Soluble	-4.44	0.0132	3.63e-05	Moderately soluble	-2.69	0.747	0.00206	Soluble	High	No	No	No	Yes	No	No	No	-6.95	0	1	0	0	0	0.56	0	0	1	4.3
ZINC3831317	Oc1ccc(cc1)C1(OC(=O)c2c1cccc2)c1ccc(cc1)O	C20H14O4	318.32	24	18	0.05	2	4	2	88.67	66.76	2.13	2.41	3.45	3.05	3.85	2.98	-3.75	0.056	0.000176	Soluble	-3.45	0.112	0.000352	Soluble	-6.43	0.000118	3.72e-07	Poorly soluble	High	Yes	Yes	Yes	No	No	Yes	No	-6.53	0	0	0	0	0	0.55	0	0	0	2.41
ZINC3831329	C[C@@H](CCC[C@H](CCCC(C)C)C)CCC/C(=C/CC1=C(C)C(=O)c2c(C1=O)cccc2)/C	C31H46O2	450.7	33	6	0.61	14	2	0	144.72	34.14	6.03	10.91	9.16	5.64	9.98	8.34	-8.72	8.62e-07	1.91e-09	Poorly soluble	-11.59	1.16e-09	2.57e-12	Insoluble	-9.73	8.3e-08	1.84e-10	Poorly soluble	Low	No	Yes	Yes	No	No	No	No	-1.3	1	3	1	1	1	0.55	1	1	3	5.35
ZINC3831330	C[C@H](CCC[C@H](CCCC(C)C)C)CCC/C(=C/CC1=C(C)C(=O)c2c(C1=O)cccc2)/C	C31H46O2	450.7	33	6	0.61	14	2	0	144.72	34.14	5.96	10.91	9.16	5.64	9.98	8.33	-8.72	8.62e-07	1.91e-09	Poorly soluble	-11.59	1.16e-09	2.57e-12	Insoluble	-9.73	8.3e-08	1.84e-10	Poorly soluble	Low	No	Yes	Yes	No	No	No	No	-1.3	1	3	1	1	1	0.55	1	1	3	5.35
ZINC3831331	C[C@@H](CCC[C@@H](CCCC(C)C)C)CCC/C(=C/CC1=C(C)C(=O)c2c(C1=O)cccc2)/C	C31H46O2	450.7	33	6	0.61	14	2	0	144.72	34.14	5.9	10.91	9.16	5.64	9.98	8.32	-8.72	8.62e-07	1.91e-09	Poorly soluble	-11.59	1.16e-09	2.57e-12	Insoluble	-9.73	8.3e-08	1.84e-10	Poorly soluble	Low	No	Yes	Yes	No	No	No	No	-1.3	1	3	1	1	1	0.55	1	1	3	5.35
ZINC3831345	CCN1CCN(C(=O)C1=O)C(=O)N[C@@H](C(=O)N[C@H]1C(=O)N2[C@@H]1SC([C@H]2C(=O)[O-])(C)C)c1ccccc1	C23H26N5O7S-	516.55	36	6	0.48	9	7	2	136.86	184.56	0.65	0.5	-3.04	-0.11	-0.69	-0.54	-2.89	0.67	0.0013	Soluble	-3.95	0.0585	0.000113	Soluble	-2.76	0.894	0.00173	Soluble	Low	No	No	No	No	No	No	No	-9.1	2	3	1	1	1	0.11	0	1	2	4.87
ZINC3831346	CCN1CCN(C(=O)C1=O)C(=O)N[C@H](C(=O)N[C@@H]1C(=O)N2[C@@H]1SC([C@H]2C(=O)[O-])(C)C)c1ccccc1	C23H26N5O7S-	516.55	36	6	0.48	9	7	2	136.86	184.56	1.61	0.5	-3.04	-0.11	-0.69	-0.35	-2.89	0.67	0.0013	Soluble	-3.95	0.0585	0.000113	Soluble	-2.76	0.894	0.00173	Soluble	Low	No	No	No	No	No	No	No	-9.1	2	3	1	1	1	0.11	0	1	2	4.87
ZINC3831347	CCN1CCN(C(=O)C1=O)C(=O)N[C@@H](C(=O)N[C@@H]1C(=O)N2[C@@H]1SC([C@H]2C(=O)[O-])(C)C)c1ccccc1	C23H26N5O7S-	516.55	36	6	0.48	9	7	2	136.86	184.56	0.72	0.5	-3.04	-0.11	-0.69	-0.53	-2.89	0.67	0.0013	Soluble	-3.95	0.0585	0.000113	Soluble	-2.76	0.894	0.00173	Soluble	Low	No	No	No	No	No	No	No	-9.1	2	3	1	1	1	0.11	0	1	2	4.87
ZINC3831354	[O-]C(=O)[C@@H](c1ccc2c(c1)Cc1c(O2)nccc1)C	C15H12NO3-	254.26	19	12	0.2	2	4	0	68.17	62.25	1.91	2.75	1.63	2.22	2.95	2.29	-3.48	0.0834	0.000328	Soluble	-3.71	0.0493	0.000194	Soluble	-4.37	0.0109	4.29e-05	Moderately soluble	High	Yes	No	No	Yes	No	No	No	-5.9	0	0	0	0	0	0.85	0	0	0	3.18
ZINC3831355	CC[C@H](C(=O)O[C@@H]1C[C@H](O)C=C2[C@@H]1[C@H](CC[C@@H](C[C@@H](CC(=O)[O-])O)O)[C@@H](C=C2)C)C	C23H35O7-	423.52	30	0	0.74	11	7	3	112.1	127.12	2.5	2.49	1.11	1.74	2.15	2	-3.31	0.208	0.000491	Soluble	-4.8	0.00664	1.57e-05	Moderately soluble	-1.36	18.7	0.0441	Soluble	High	No	Yes	No	No	No	No	Yes	-7.12	0	0	1	0	0	0.56	0	0	2	5.84
ZINC3831356	CC[C@@H](C(=O)O[C@@H]1C[C@H](O)C=C2[C@@H]1[C@H](CC[C@@H](C[C@@H](CC(=O)[O-])O)O)[C@@H](C=C2)C)C	C23H35O7-	423.52	30	0	0.74	11	7	3	112.1	127.12	3.21	2.49	1.11	1.74	2.15	2.14	-3.31	0.208	0.000491	Soluble	-4.8	0.00664	1.57e-05	Moderately soluble	-1.36	18.7	0.0441	Soluble	High	No	Yes	No	No	No	No	Yes	-7.12	0	0	1	0	0	0.56	0	0	2	5.84
ZINC3831357	CC[C@H](C(=O)O[C@H]1C[C@H](O)C=C2[C@@H]1[C@H](CC[C@@H](C[C@@H](CC(=O)[O-])O)O)[C@@H](C=C2)C)C	C23H35O7-	423.52	30	0	0.74	11	7	3	112.1	127.12	2.26	2.49	1.11	1.74	2.15	1.95	-3.31	0.208	0.000491	Soluble	-4.8	0.00664	1.57e-05	Moderately soluble	-1.36	18.7	0.0441	Soluble	High	No	Yes	No	No	No	No	Yes	-7.12	0	0	1	0	0	0.56	0	0	2	5.84
ZINC3831358	CC[C@@H](C(=O)O[C@H]1C[C@H](O)C=C2[C@@H]1[C@H](CC[C@@H](C[C@@H](CC(=O)[O-])O)O)[C@@H](C=C2)C)C	C23H35O7-	423.52	30	0	0.74	11	7	3	112.1	127.12	2.78	2.49	1.11	1.74	2.15	2.05	-3.31	0.208	0.000491	Soluble	-4.8	0.00664	1.57e-05	Moderately soluble	-1.36	18.7	0.0441	Soluble	High	No	Yes	No	No	No	No	Yes	-7.12	0	0	1	0	0	0.56	0	0	2	5.84
ZINC3831364	OCC(=O)[C@@]1(O)CC[C@@H]2[C@]1(C)C[C@H](O)[C@@H]1[C@@H]2CCC2=CC(=O)C=C[C@@]12C	C21H28O5	360.44	26	0	0.71	2	5	3	97.06	94.83	1.99	1.62	1.56	1.3	2.06	1.71	-2.96	0.392	0.00109	Soluble	-3.22	0.215	0.000597	Soluble	-2.17	2.45	0.00681	Soluble	High	No	Yes	No	No	No	No	No	-7.35	0	0	0	0	0	0.55	0	0	1	5.23
ZINC3831366	OCC(=O)[C@@]1(O)CC[C@@H]2[C@]1(C)C[C@@H](O)[C@@H]1[C@@H]2CCC2=CC(=O)C=C[C@@]12C	C21H28O5	360.44	26	0	0.71	2	5	3	97.06	94.83	2.04	1.62	1.56	1.3	2.06	1.72	-2.96	0.392	0.00109	Soluble	-3.22	0.215	0.000597	Soluble	-2.17	2.45	0.00681	Soluble	High	No	Yes	No	No	No	No	No	-7.35	0	0	0	0	0	0.55	0	0	1	5.23
ZINC3831368	CC(=O)OCC(=O)[C@@]1(O)CC[C@@H]2[C@]1(C)C[C@H](O)[C@@H]1[C@@H]2CCC2=CC(=O)C=C[C@@]12C	C23H30O6	402.48	29	0	0.7	4	6	2	106.8	100.9	2.69	2.4	2.13	1.64	2.56	2.28	-3.58	0.105	0.000261	Soluble	-4.16	0.0278	6.91e-05	Moderately soluble	-2.79	0.66	0.00164	Soluble	High	No	Yes	No	No	No	No	No	-7.05	0	0	0	0	0	0.55	0	0	1	5.25
ZINC3831370	CC(=O)OCC(=O)[C@@]1(O)CC[C@H]2[C@]1(C)C[C@H](O)[C@@H]1[C@@H]2CCC2=CC(=O)C=C[C@@]12C	C23H30O6	402.48	29	0	0.7	4	6	2	106.8	100.9	2.2	2.4	2.13	1.64	2.56	2.19	-3.58	0.105	0.000261	Soluble	-4.16	0.0278	6.91e-05	Moderately soluble	-2.79	0.66	0.00164	Soluble	High	No	Yes	No	No	No	No	No	-7.05	0	0	0	0	0	0.55	0	0	1	5.25
ZINC3831374	[O-]C(=O)CCC(=O)OCC(=O)[C@@]1(O)CC[C@@H]2[C@]1(C)C[C@@H](O)[C@@H]1[C@@H]2CCC2=CC(=O)C=C[C@@]12C	C25H31O8-	459.51	33	0	0.68	7	8	2	116.24	141.03	2.31	1.83	0.64	1.21	2.32	1.66	-3.38	0.192	0.000417	Soluble	-4.41	0.0178	3.87e-05	Moderately soluble	-2.53	1.37	0.00298	Soluble	High	No	Yes	No	No	No	No	No	-7.8	0	0	1	1	0	0.56	0	0	1	5.55
ZINC3831381	CCCCC(=O)O[C@@]1(CC[C@H]2[C@]1(C)C[C@H](O)[C@@H]1[C@@H]2CCC2=CC(=O)C=C[C@@]12C)C(=O)COC(=O)C	C28H38O7	486.6	35	0	0.71	9	7	1	130.96	106.97	3.48	4.34	3.87	2.6	4.3	3.72	-5	0.0049	1.01e-05	Moderately soluble	-6.3	0.000243	5e-07	Poorly soluble	-4.57	0.0132	2.7e-05	Moderately soluble	High	No	Yes	No	No	Yes	No	Yes	-6.19	0	3	0	0	0	0.55	0	1	3	5.84
ZINC3831392	CCCOC(=O)Cn1cc(I)c(=O)c(c1)I	C10H11I2NO3	447.01	16	6	0.4	5	3	0	77.91	48.3	2.72	2.41	2.01	1.72	3.31	2.43	-4.08	0.0374	8.37e-05	Moderately soluble	-3.07	0.384	0.000858	Soluble	-4.18	0.0298	6.67e-05	Moderately soluble	High	Yes	No	Yes	Yes	No	No	No	-7.32	0	0	0	0	0	0.55	0	1	1	2.59
ZINC3831402	CCOC(=O)[C@H]([NH2+][C@@H](C(=O)N1Cc2ccccc2C[C@@H]1C(=O)[O-])C)CCc1ccccc1	C25H30N2O5	438.52	32	12	0.4	11	5	1	123.81	103.35	2.91	1.24	-0.33	-1.52	3.39	1.14	-2.89	0.563	0.00128	Soluble	-3.01	0.43	0.000981	Soluble	-5.89	0.00057	1.3e-06	Moderately soluble	High	No	Yes	No	No	No	No	No	-8.09	0	0	1	0	0	0.55	0	0	2	4.13
ZINC3831411	CCOc1cc(ccc1C(=O)[O-])CC(=O)N[C@@H](c1ccccc1N1CCCCC1)CC(C)C	C27H35N2O4-	451.58	33	12	0.48	11	4	1	133.5	81.7	4.06	5.18	3.18	3.44	5.12	4.2	-5.45	0.00162	3.58e-06	Moderately soluble	-6.64	0.000103	2.28e-07	Poorly soluble	-7.1	3.6e-05	7.96e-08	Poorly soluble	High	No	No	No	No	Yes	Yes	Yes	-5.38	0	1	1	0	1	0.56	0	0	3	3.85
ZINC3831419	OC[C@@H]1O[C@H]([C@@H]([C@@H]1O)O)n1cnc(n1)C(=O)N	C8H12N4O5	244.2	17	5	0.62	3	7	4	51.06	143.72	0.33	-1.85	-3.34	-2.94	-2.9	-2.14	-0.21	151	0.619	Very soluble	-0.65	54.7	0.224	Very soluble	1.76	14000	57.3	Soluble	Low	No	No	No	No	No	No	No	-9.1	0	1	1	1	0	0.55	0	0	1	3.89
ZINC3831421	OC[C@@H]1O[C@H]([C@H]([C@@H]1O)O)n1cnc(n1)C(=O)N	C8H12N4O5	244.2	17	5	0.62	3	7	4	51.06	143.72	-0.01	-1.85	-3.34	-2.94	-2.9	-2.21	-0.21	151	0.619	Very soluble	-0.65	54.7	0.224	Very soluble	1.76	14000	57.3	Soluble	Low	No	No	No	No	No	No	No	-9.1	0	1	1	1	0	0.55	0	0	1	3.89
ZINC3831422	OC[C@H]([C@H]([C@@H](Cn1c2cc(C)c(cc2nc2c1nc(=O)[nH]c2=O)C)O)O)O	C17H20N4O6	376.36	27	14	0.41	5	8	5	96.99	161.56	0.94	-1.46	-1.68	-0.54	1.09	-0.33	-1.31	18.5	0.0493	Very soluble	-1.43	14	0.0372	Very soluble	-2.62	0.903	0.0024	Soluble	Low	No	No	No	No	No	No	No	-9.63	0	1	1	1	1	0.55	0	1	1	3.84
ZINC3831424	OC[C@H]([C@@H]([C@@H](Cn1c2cc(C)c(cc2nc2c1nc(=O)[nH]c2=O)C)O)O)O	C17H20N4O6	376.36	27	14	0.41	5	8	5	96.99	161.56	1.21	-1.46	-1.68	-0.54	1.09	-0.27	-1.31	18.5	0.0493	Very soluble	-1.43	14	0.0372	Very soluble	-2.62	0.903	0.0024	Soluble	Low	No	No	No	No	No	No	No	-9.63	0	1	1	1	1	0.55	0	1	1	3.84
ZINC3831427	O=c1[nH]c(=O)c2c(n1)n(C[C@@H]([C@H]([C@@H](COP(=O)([O-])[O-])O)O)O)c1c(n2)cc(c(c1)C)C	C17H19N4O9P--	454.33	31	14	0.41	7	11	4	104.84	223.56	0.33	-2.56	-0.68	-1.25	-0.05	-0.84	-0.92	55.1	0.121	Very soluble	-1.59	11.7	0.0257	Very soluble	-1.73	8.44	0.0186	Soluble	Low	No	No	No	No	No	No	No	-10.89	1	1	1	1	3	0.11	0	2	1	4.34
ZINC3831428	O=c1[nH]c(=O)c2c(n1)n(C[C@H]([C@H]([C@@H](COP(=O)([O-])[O-])O)O)O)c1c(n2)cc(c(c1)C)C	C17H19N4O9P--	454.33	31	14	0.41	7	11	4	104.84	223.56	0.04	-2.56	-0.68	-1.25	-0.05	-0.9	-0.92	55.1	0.121	Very soluble	-1.59	11.7	0.0257	Very soluble	-1.73	8.44	0.0186	Soluble	Low	No	No	No	No	No	No	No	-10.89	1	1	1	1	3	0.11	0	2	1	4.34
ZINC3831445	C[NH2+][C@@H]1CC[C@H](c2c1cccc2)c1ccc(c(c1)Cl)Cl	C17H18Cl2N+	307.24	20	12	0.29	2	0	1	87.25	16.61	3.34	4.78	3.83	1.02	5.02	3.6	-5.07	0.00263	8.55e-06	Moderately soluble	-4.86	0.00424	1.38e-05	Moderately soluble	-7.22	1.86e-05	6.04e-08	Poorly soluble	High	Yes	No	Yes	Yes	Yes	Yes	No	-4.78	0	0	0	0	1	0.55	0	0	1	3.18
ZINC3831448	OC[C@@H]1Oc2ccc(cc2O[C@@H]1c1ccc(c(c1)OC)O)[C@H]1Oc2cc(O)cc(c2C(=O)[C@H]1O)O	C25H22O10	482.44	35	18	0.24	4	10	5	120.55	155.14	2.75	1.9	1.71	-0.4	1.92	1.58	-4.14	0.0346	7.17e-05	Moderately soluble	-4.78	0.00799	1.66e-05	Moderately soluble	-4.5	0.0153	3.16e-05	Moderately soluble	Low	No	No	No	No	No	No	Yes	-7.89	0	1	1	1	1	0.55	0	0	1	4.92
ZINC3831450	CCC(C(=O)O[C@@H]1C[C@H](C)C=C2[C@@H]1[C@H](CC[C@@H]1C[C@H](O)CC(=O)O1)[C@@H](C=C2)C)(C)C	C25H38O5	418.57	30	0	0.76	7	5	1	118.47	72.83	3.83	4.68	4.59	3.77	3.77	4.13	-4.92	0.00501	1.2e-05	Moderately soluble	-5.94	0.000484	1.16e-06	Moderately soluble	-3.56	0.115	0.000274	Soluble	High	No	No	No	No	Yes	No	Yes	-5.53	0	0	0	0	0	0.55	0	1	2	5.8
ZINC3831458	CC[C@H](C(C)C)CC[C@H]([C@@H]1CC[C@@H]2[C@]1(C)CC[C@@H]1[C@@H]2CC=C2[C@]1(C)CC[C@@H](C2)O)C	C29H50O	414.71	30	0	0.93	6	1	1	133.23	20.23	5.05	9.34	8.02	6.73	7.04	7.24	-7.9	5.23e-06	1.26e-08	Poorly soluble	-9.67	8.9e-08	2.15e-10	Poorly soluble	-6.19	0.000269	6.49e-07	Poorly soluble	Low	No	No	No	No	No	No	No	-2.2	1	3	0	1	2	0.55	0	1	2	6.3
ZINC3831460	CC[C@H](C(C)C)CC[C@@H]([C@@H]1CC[C@@H]2[C@]1(C)CC[C@@H]1[C@@H]2CC=C2[C@]1(C)CC[C@@H](C2)O)C	C29H50O	414.71	30	0	0.93	6	1	1	133.23	20.23	4.99	9.34	8.02	6.73	7.04	7.23	-7.9	5.23e-06	1.26e-08	Poorly soluble	-9.67	8.9e-08	2.15e-10	Poorly soluble	-6.19	0.000269	6.49e-07	Poorly soluble	Low	No	No	No	No	No	No	No	-2.2	1	3	0	1	2	0.55	0	1	2	6.3
ZINC3831462	[O-]C(=O)COc1cc(OCC=C(C)C)ccc1C(=O)/C=C/c1ccc(cc1)OCC=C(C)C	C27H29O6-	449.52	33	12	0.26	12	6	0	127.87	84.89	4.21	6.2	4.29	3.2	6.05	4.79	-6.01	0.000439	9.77e-07	Poorly soluble	-7.77	7.68e-06	1.71e-08	Poorly soluble	-6.37	0.000194	4.31e-07	Poorly soluble	High	No	No	No	No	No	No	Yes	-4.64	0	0	1	0	1	0.56	0	2	3	3.94
ZINC3831465	C[NH2+][C@H]1[C@@H](O)[C@H]2O[C@@H]3O[C@H](C)CC(=O)[C@]3(O[C@H]2[C@H]([C@H]1O)[NH2+]C)O	C14H26N2O7++	334.37	23	0	0.93	2	7	5	78.17	138.67	1.46	-3.08	-4.98	-9.81	-2.27	-3.74	0.16	483	1.44	Highly soluble	0.73	1810	5.41	Highly soluble	0.3	673	2.01	Soluble	Low	No	Yes	No	No	No	No	No	-10.53	0	1	0	1	1	0.55	0	0	0	5.24
ZINC3831467	C[NH2+][C@H]1[C@@H](O)[C@H]2O[C@@H]3O[C@H](C)CC(=O)[C@@]3(O[C@H]2[C@H]([C@H]1O)[NH2+]C)O	C14H26N2O7++	334.37	23	0	0.93	2	7	5	78.17	138.67	1.66	-3.08	-4.98	-9.81	-2.27	-3.7	0.16	483	1.44	Highly soluble	0.73	1810	5.41	Highly soluble	0.3	673	2.01	Soluble	Low	No	Yes	No	No	No	No	No	-10.53	0	1	0	1	1	0.55	0	0	0	5.24
ZINC3831470	OC[C@@H]1O[C@H](O)[C@@H]([C@@H]([C@@H]1O)O)NC(=O)N(N=O)C	C8H15N3O7	265.22	18	0	0.88	5	8	5	55.21	151.92	1.35	-0.89	-2.89	-2.61	-3.47	-1.7	-0.59	67.6	0.255	Very soluble	-1.82	4.03	0.0152	Very soluble	2.36	60800	229	Soluble	Low	No	Yes	No	No	No	No	No	-8.55	0	1	1	1	1	0.55	0	1	0	4.13
ZINC3831483	O=C1N(c2ccccc2)N(C(=O)C1CC[S@@](=O)c1ccccc1)c1ccccc1	C23H20N2O3S	404.48	29	18	0.13	6	3	0	120.08	76.9	3.25	2.3	3.9	3.54	2.33	3.06	-3.86	0.0558	0.000138	Soluble	-3.55	0.113	0.00028	Soluble	-7.23	2.4e-05	5.94e-08	Poorly soluble	High	Yes	No	No	Yes	Yes	Yes	Yes	-7.13	0	0	0	0	0	0.55	1	1	1	3.81
ZINC3831493	CCOC(=O)Oc1c(OC)cc(cc1OC)C(=O)O[C@H]1C[C@@H]2C[NH+]3CCc4c([C@@H]3C[C@@H]2[C@@H]([C@@H]1OC)C(=O)OC)[nH]c1c4ccc(c1)OC	C35H43N2O11+	667.72	48	15	0.51	13	11	2	177.77	145.28	5.35	4.59	2.58	-1.93	3.87	2.89	-6.24	0.00038	5.69e-07	Poorly soluble	-7.37	2.88e-05	4.31e-08	Poorly soluble	-6.91	8.31e-05	1.24e-07	Poorly soluble	Low	No	Yes	No	No	No	No	No	-7.11	2	3	2	1	2	0.17	1	2	3	6.31
ZINC3831495	CCOC(=O)Oc1c(OC)cc(cc1OC)C(=O)O[C@H]1C[C@H]2C[NH+]3CCc4c([C@@H]3C[C@@H]2[C@@H]([C@@H]1OC)C(=O)OC)[nH]c1c4ccc(c1)OC	C35H43N2O11+	667.72	48	15	0.51	13	11	2	177.77	145.28	5.27	4.59	2.58	-1.93	3.87	2.88	-6.24	0.00038	5.69e-07	Poorly soluble	-7.37	2.88e-05	4.31e-08	Poorly soluble	-6.91	8.31e-05	1.24e-07	Poorly soluble	Low	No	Yes	No	No	No	No	No	-7.11	2	3	2	1	2	0.17	1	2	3	6.31
ZINC3831503	[O-]C(=O)[C@@H]1N2C(=O)C[C@@H]2S(=O)(=O)[C@]1(C)Cn1ccnn1	C10H11N4O5S-	299.28	20	5	0.6	3	7	0	66.55	133.67	0.03	-1.98	-2.16	-0.44	-2	-1.31	-0.44	110	0.367	Very soluble	-0.3	149	0.497	Very soluble	-0.25	168	0.56	Soluble	Low	No	No	No	No	No	No	No	-9.53	0	1	0	1	0	0.56	0	0	0	4.2
ZINC3831506	COc1cc(cc(c1O)OC)[C@H]1[C@H]2C(=O)OC[C@@H]2[C@H](c2c1cc1OCOc1c2)O[C@H]1O[C@H]2CO[C@@H](O[C@@H]2[C@H]([C@H]1O)O)c1cccs1	C32H32O13S	656.65	46	17	0.47	6	13	3	156.66	189.07	3.41	1.24	2.1	0.24	2.56	1.91	-4.57	0.0177	2.69e-05	Moderately soluble	-4.81	0.0102	1.55e-05	Moderately soluble	-4.49	0.0213	3.24e-05	Moderately soluble	Low	No	Yes	No	No	No	Yes	No	-9.43	2	3	1	1	4	0.17	0	0	1	6.48
ZINC3831512	O=C1C=C[C@@]2(C(=C1)CC[C@H]1[C@H]2CC[C@@]2([C@H]1CCC(=O)O2)C)C	C19H24O3	300.39	22	0	0.68	0	3	0	85.31	43.37	2.63	3.03	3.59	3.34	3.36	3.19	-3.61	0.0735	0.000245	Soluble	-3.61	0.0744	0.000248	Soluble	-3.44	0.108	0.000359	Soluble	High	Yes	No	No	No	Yes	No	No	-5.98	0	0	0	0	0	0.55	0	0	0	4.48
ZINC3831515	O=C1C=C[C@@]2(C(=C1)CC[C@H]1[C@@H]2CC[C@]2([C@H]1CCC(=O)O2)C)C	C19H24O3	300.39	22	0	0.68	0	3	0	85.31	43.37	2.61	3.03	3.59	3.34	3.36	3.19	-3.61	0.0735	0.000245	Soluble	-3.61	0.0744	0.000248	Soluble	-3.44	0.108	0.000359	Soluble	High	Yes	No	No	No	Yes	No	No	-5.98	0	0	0	0	0	0.55	0	0	0	4.48
ZINC3831529	OC[C@@H]1O[C@H](C[C@@H]1O)n1cc(C)c(=O)[nH]c1=O	C10H14N2O5	242.23	17	6	0.6	2	5	3	58.07	104.55	1.32	-1.17	-1.84	-1.15	-0.04	-0.58	-0.73	44.7	0.185	Very soluble	-0.53	71.1	0.293	Very soluble	-0.45	86.3	0.356	Soluble	High	No	No	No	No	No	No	No	-8.61	0	1	0	0	0	0.55	0	0	1	3.64
ZINC3831539	O=C([C@@H](c1cscc1)C(=O)[O-])N[C@@H]1C(=O)N2[C@H]1SC([C@H]2C(=O)[O-])(C)C	C15H14N2O6S2--	382.41	25	5	0.47	6	6	1	90.43	183.21	0.68	0.81	-2.5	0.48	0.84	0.06	-2.47	1.29	0.00336	Soluble	-4.24	0.022	5.77e-05	Moderately soluble	-1.19	24.9	0.065	Soluble	Low	No	No	No	No	No	No	No	-8.06	0	1	1	1	1	0.11	0	1	1	4.31
ZINC3831544	CO[C@H]1CC(=C(c2cccs2)c2cccs2)C[N+](C1)(C)C	C17H22NOS2+	320.49	21	10	0.41	3	1	0	97.26	65.71	-0.14	3.31	3.73	-0.91	2.86	1.77	-4.07	0.0275	8.58e-05	Moderately soluble	-4.37	0.0138	4.31e-05	Moderately soluble	-5.58	0.000851	2.65e-06	Moderately soluble	High	Yes	Yes	Yes	No	No	Yes	Yes	-5.9	0	0	0	0	0	0.55	0	1	0	3.77
ZINC3831552	CC[C@@H]1C(=NN=C(c2c1cc(OC)c(c2)OC)c1ccc(c(c1)OC)OC)C	C22H26N2O4	382.45	28	12	0.36	6	6	0	117.97	61.64	3.8	4	3.68	2.26	5.69	3.89	-4.65	0.00852	2.23e-05	Moderately soluble	-5	0.00386	1.01e-05	Moderately soluble	-7.21	2.37e-05	6.21e-08	Poorly soluble	High	Yes	No	No	Yes	Yes	Yes	Yes	-5.79	0	0	0	0	0	0.55	0	0	2	4.64
ZINC3831563	CCOC(=O)[C@@H]([NH2+][C@H](C(=O)N1[C@@H]2CCCC[C@@H]2C[C@@H]1C(=O)[O-])C)CCc1ccccc1	C24H34N2O5	430.54	31	6	0.62	11	5	1	121.08	103.35	3.69	1.97	0.03	-1.49	2.82	1.41	-3.17	0.293	0.00068	Soluble	-3.77	0.0738	0.000171	Soluble	-4.3	0.0214	4.97e-05	Moderately soluble	High	No	No	No	No	No	No	No	-7.53	0	0	1	0	0	0.55	0	0	2	4.34
ZINC3831565	CCOC(=O)[C@@H]([NH2+][C@@H](C(=O)N1[C@@H]2CCCC[C@@H]2C[C@@H]1C(=O)[O-])C)CCc1ccccc1	C24H34N2O5	430.54	31	6	0.62	11	5	1	121.08	103.35	3.45	1.97	0.03	-1.49	2.82	1.36	-3.17	0.293	0.00068	Soluble	-3.77	0.0738	0.000171	Soluble	-4.3	0.0214	4.97e-05	Moderately soluble	High	No	No	No	No	No	No	No	-7.53	0	0	1	0	0	0.55	0	0	2	4.34
ZINC3831578	CC[C@](c1ccccc1)([NH+](C)C)COC(=O)c1cc(OC)c(c(c1)OC)OC	C22H30NO5+	388.48	28	12	0.41	10	5	1	109.76	58.43	4.1	3.97	2.21	-0.95	3.88	2.64	-4.41	0.0152	3.92e-05	Moderately soluble	-4.9	0.00491	1.27e-05	Moderately soluble	-6.28	0.000206	5.31e-07	Poorly soluble	High	Yes	Yes	No	No	No	No	No	-5.85	0	0	0	0	0	0.55	0	0	3	3.61
ZINC3831581	O=C1N(Cc2ccccc2)[C@@H]2[C@H](N1Cc1ccccc1)C[S@+]1[C@@H]2CCC1	C22H25N2OS+	365.51	26	12	0.41	4	1	0	115.45	48.85	0	3.62	2.59	4.17	2.08	2.49	-4.46	0.0125	3.43e-05	Moderately soluble	-4.33	0.017	4.64e-05	Moderately soluble	-5.87	0.000495	1.36e-06	Moderately soluble	High	Yes	Yes	No	No	No	Yes	Yes	-5.96	1	0	0	0	0	0.55	0	2	2	4.03
ZINC3831583	O=C1N(Cc2ccccc2)[C@@H]2[C@H](N1Cc1ccccc1)C[S@@+]1[C@@H]2CCC1	C22H25N2OS+	365.51	26	12	0.41	4	1	0	115.45	48.85	0	3.62	2.59	4.17	2.08	2.49	-4.46	0.0125	3.43e-05	Moderately soluble	-4.33	0.017	4.64e-05	Moderately soluble	-5.87	0.000495	1.36e-06	Moderately soluble	High	Yes	Yes	No	No	No	Yes	Yes	-5.96	1	0	0	0	0	0.55	0	2	2	4.03
ZINC3831584	O=C1N(Cc2ccccc2)[C@@H]2[C@@H](N1Cc1ccccc1)C[S@@+]1[C@@H]2CCC1	C22H25N2OS+	365.51	26	12	0.41	4	1	0	115.45	48.85	0	3.62	2.59	4.17	2.08	2.49	-4.46	0.0125	3.43e-05	Moderately soluble	-4.33	0.017	4.64e-05	Moderately soluble	-5.87	0.000495	1.36e-06	Moderately soluble	High	Yes	Yes	No	No	No	Yes	Yes	-5.96	1	0	0	0	0	0.55	0	2	2	4.03
ZINC3831599	O[C@H]1CC[C@]2([C@H](C1)C[C@H]([C@H]1[C@H]2CC[C@]2([C@H]1CC[C@H]2[C@@H](CCC(=O)[O-])C)C)O)C	C24H39O4-	391.56	28	0	0.96	4	4	2	110.66	80.59	3.14	3.08	3.14	3.88	3.42	3.33	-3.94	0.0445	0.000114	Soluble	-4.44	0.0142	3.63e-05	Moderately soluble	-3.13	0.29	0.00074	Soluble	High	No	Yes	No	No	No	No	No	-6.5	0	0	0	0	0	0.56	0	0	1	4.89
ZINC3831601	O[C@H]1CC[C@]2([C@H](C1)C[C@H]([C@H]1[C@H]2CC[C@]2([C@H]1CC[C@@H]2[C@@H](CCC(=O)[O-])C)C)O)C	C24H39O4-	391.56	28	0	0.96	4	4	2	110.66	80.59	3.06	3.08	3.14	3.88	3.42	3.32	-3.94	0.0445	0.000114	Soluble	-4.44	0.0142	3.63e-05	Moderately soluble	-3.13	0.29	0.00074	Soluble	High	No	Yes	No	No	No	No	No	-6.5	0	0	0	0	0	0.56	0	0	1	4.89
ZINC3831611	O[C@H]1CO[C@H]([C@H]([C@H]1O)O)O	C5H10O5	150.13	10	0	1	0	5	4	29.77	90.15	-0.06	-3.02	-2.58	-2.32	-1.7	-1.94	1.13	2030	13.5	Highly soluble	1.69	7340	48.9	Highly soluble	2.23	25600	171	Soluble	Low	No	No	No	No	No	No	No	-9.36	0	3	0	0	2	0.55	0	0	1	3.8
ZINC3831612	OC[C@H]([C@H]([C@H]1OC(=C[C@H]([C@H]1NC(=O)C)NC(=[NH2+])N)C(=O)[O-])O)O	C12H20N4O7	332.31	23	0	0.58	8	7	7	74.38	202.79	-0.6	-2.98	-6.73	-3.18	-3.12	-3.32	0.51	1060	3.2	Highly soluble	-0.72	63.7	0.192	Very soluble	1.64	14300	43.2	Soluble	Low	No	No	No	No	No	No	No	-10.44	2	1	1	1	3	0.17	0	2	1	4.84
ZINC3831615	O[C@@H]1CCCCCc2cc(O)cc(c2C(=O)O[C@H](CCC1)C)O	C18H26O5	322.4	23	6	0.61	0	5	3	89.04	86.99	2.51	4.33	3.29	2.23	2.46	2.96	-4.76	0.00561	1.74e-05	Moderately soluble	-5.87	0.000434	1.35e-06	Moderately soluble	-3.27	0.174	0.00054	Soluble	High	No	No	No	No	No	Yes	No	-5.19	0	0	0	0	0	0.55	0	0	1	4.17
ZINC3831616	O[C@H]1CCCCCc2cc(O)cc(c2C(=O)O[C@@H](CCC1)C)O	C18H26O5	322.4	23	6	0.61	0	5	3	89.04	86.99	2.44	4.33	3.29	2.23	2.46	2.95	-4.76	0.00561	1.74e-05	Moderately soluble	-5.87	0.000434	1.35e-06	Moderately soluble	-3.27	0.174	0.00054	Soluble	High	No	No	No	No	No	Yes	No	-5.19	0	0	0	0	0	0.55	0	0	1	4.17
ZINC3831618	OC[C@@H]1O[C@@H](C[C@@H]1N=[N+]=[N-])n1cc(C)c(=O)[nH]c1=O	C10H13N5O4	267.24	19	6	0.6	3	7	2	61.73	134.07	1.9	0.05	-0.52	-1.25	-0.78	-0.12	-1.56	7.29	0.0273	Very soluble	-2.42	1.02	0.00381	Soluble	-1.16	18.4	0.0687	Soluble	High	No	No	No	No	No	No	No	-7.89	0	1	0	1	0	0.55	1	3	0	3.93
ZINC3831620	OC[C@@H]1O[C@@H](C[C@H]1N=[N+]=[N-])n1cc(C)c(=O)[nH]c1=O	C10H13N5O4	267.24	19	6	0.6	3	7	2	61.73	134.07	1.71	0.05	-0.52	-1.25	-0.78	-0.16	-1.56	7.29	0.0273	Very soluble	-2.42	1.02	0.00381	Soluble	-1.16	18.4	0.0687	Soluble	High	No	No	No	No	No	No	No	-7.89	0	1	0	1	0	0.55	1	3	0	3.93
ZINC3831621	OC[C@@H]1O[C@H](C[C@H]1N=[N+]=[N-])n1cc(C)c(=O)[nH]c1=O	C10H13N5O4	267.24	19	6	0.6	3	7	2	61.73	134.07	1.79	0.05	-0.52	-1.25	-0.78	-0.14	-1.56	7.29	0.0273	Very soluble	-2.42	1.02	0.00381	Soluble	-1.16	18.4	0.0687	Soluble	High	No	No	No	No	No	No	No	-7.89	0	1	0	1	0	0.55	1	3	0	3.93
ZINC3871612	O[C@@H]1[C@H](CO[P@](=O)(O[P@](=O)(OP(=O)([O-])[O-])[O-])[O-])O[C@@H]([C@@H]1O)n1cnc2c1ncnc2N	C10H12N5O13P3----	503.15	31	9	0.5	8	16	3	89.28	319.88	-1.77	-5.71	-0.19	-4.79	-5.68	-3.63	0.95	4490	8.93	Highly soluble	-0.34	228	0.454	Very soluble	3.05	559000	1110	Soluble	Low	No	Yes	No	No	No	No	No	-13.42	2	1	1	1	3	0.11	0	1	2	4.96
ZINC3871613	O[C@@H]1[C@H](CO[P@](=O)(O[P@](=O)(OP(=O)([O-])[O-])[O-])[O-])O[C@H]([C@@H]1O)n1cnc2c1ncnc2N	C10H12N5O13P3----	503.15	31	9	0.5	8	16	3	89.28	319.88	0.21	-5.71	-0.19	-4.79	-5.68	-3.23	0.95	4490	8.93	Highly soluble	-0.34	228	0.454	Very soluble	3.05	559000	1110	Soluble	Low	No	Yes	No	No	No	No	No	-13.42	2	1	1	1	3	0.11	0	1	2	4.96
ZINC3871614	O[C@@H]1[C@H](CO[P@](=O)(O[P@](=O)(OP(=O)([O-])[O-])[O-])[O-])O[C@@H]([C@H]1O)n1cnc2c1ncnc2N	C10H12N5O13P3----	503.15	31	9	0.5	8	16	3	89.28	319.88	-0.4	-5.71	-0.19	-4.79	-5.68	-3.36	0.95	4490	8.93	Highly soluble	-0.34	228	0.454	Very soluble	3.05	559000	1110	Soluble	Low	No	Yes	No	No	No	No	No	-13.42	2	1	1	1	3	0.11	0	1	2	4.96
ZINC3871615	O[C@@H]1[C@H](CO[P@](=O)(O[P@](=O)(OP(=O)([O-])[O-])[O-])[O-])O[C@H]([C@H]1O)n1cnc2c1ncnc2N	C10H12N5O13P3----	503.15	31	9	0.5	8	16	3	89.28	319.88	-1.56	-5.71	-0.19	-4.79	-5.68	-3.59	0.95	4490	8.93	Highly soluble	-0.34	228	0.454	Very soluble	3.05	559000	1110	Soluble	Low	No	Yes	No	No	No	No	No	-13.42	2	1	1	1	3	0.11	0	1	2	4.96
ZINC3875998	O=C1CC[C@@]2(C(=C1)C=C[C@@H]1[C@H]2CC[C@]2([C@H]1CC[C@@H]2C(=O)C)C)C	C21H28O2	312.45	23	0	0.71	1	2	0	93.54	34.14	2.94	3.79	4.5	3.86	4.08	3.83	-4.1	0.0249	7.96e-05	Moderately soluble	-4.2	0.0197	6.29e-05	Moderately soluble	-3.92	0.038	0.000122	Soluble	High	Yes	No	No	Yes	Yes	No	No	-5.52	0	0	0	0	0	0.55	0	0	1	5.23
ZINC3954487	C[NH+]1CCCC[C@@H]1CCN1c2ccccc2Sc2c1cc(cc2)[S@](=O)C	C21H27N2OS2+	387.58	26	12	0.43	4	1	1	119.66	69.26	3.65	4.51	3.59	0.39	3.23	3.07	-5.16	0.00267	6.89e-06	Moderately soluble	-5.69	0.000799	2.06e-06	Moderately soluble	-6.38	0.00016	4.14e-07	Poorly soluble	High	Yes	Yes	No	Yes	Yes	No	No	-5.46	0	0	0	0	0	0.55	0	0	2	4.65
ZINC3977884	[O-]C(=O)CC[C@]1(O)CC[C@H]2[C@]1(C)CC[C@H]1[C@@H]2C=CC2=CC(=O)CC[C@]12C	C22H29O4-	357.46	26	0	0.73	3	4	1	99.17	77.43	2.61	1.9	2.56	3.16	3.35	2.72	-3.06	0.315	0.00088	Soluble	-3.15	0.254	0.00071	Soluble	-3.38	0.149	0.000418	Soluble	High	Yes	Yes	No	No	No	No	No	-7.13	0	0	0	0	0	0.56	0	0	1	5.29
ZINC3977994	C#C[C@]1(O)CC[C@@H]2[C@]1(C)CC[C@@H]1[C@H]2CCc2c1ccc(c2)O	C20H24O2	296.4	22	6	0.6	0	2	2	88.84	40.46	2.73	3.67	3.69	3.9	3.94	3.59	-4.19	0.0191	6.43e-05	Moderately soluble	-4.21	0.0183	6.18e-05	Moderately soluble	-4.04	0.0269	9.08e-05	Moderately soluble	High	Yes	Yes	No	No	Yes	Yes	No	-5.5	0	0	0	0	0	0.55	0	1	1	4.01
ZINC3978002	Oc1ccc2c(c1)CC[C@@H]1[C@H]2CC[C@]2([C@H]1CC[C@@H]2O)C	C18H24O2	272.38	20	6	0.67	0	2	2	81.03	40.46	2.6	4.01	3.61	3.53	3.25	3.4	-4.28	0.0144	5.28e-05	Moderately soluble	-4.56	0.00747	2.74e-05	Moderately soluble	-3.75	0.0485	0.000178	Soluble	High	Yes	Yes	No	No	No	Yes	No	-5.11	0	0	0	0	0	0.55	0	0	1	3.49
ZINC3978018	OC[C@H]1O[C@@H]([C@H]([C@@H]1O)O)n1ccc(nc1=O)N	C9H13N3O5	243.22	17	6	0.56	2	6	4	55.85	130.83	-0.08	-2.13	-2.88	-2.29	-2.25	-1.93	-0.14	178	0.732	Very soluble	-0.09	198	0.816	Very soluble	1.01	2490	10.2	Soluble	Low	No	No	No	No	No	No	No	-9.3	0	1	0	0	1	0.55	0	0	1	3.84
ZINC3978030	O=C([C@H](C1=CCC=CC1)[NH3+])N[C@@H]1C(=O)N2[C@@H]1SCC(=C2C(=O)[O-])C	C16H19N3O4S	349.4	24	0	0.44	5	4	2	92.66	142.48	1.64	0.45	-2.08	-2.93	-0.18	-0.62	-1.96	3.83	0.011	Very soluble	-3.01	0.341	0.000977	Soluble	-0.75	62.4	0.179	Soluble	Low	No	No	No	No	No	No	No	-8.11	0	1	1	1	0	0.55	0	1	0	4.84
ZINC3978074	OC[C@H]1O[C@@H](C[C@@H]1N=[N+]=[N-])n1cc(C)c(=O)[nH]c1=O	C10H13N5O4	267.24	19	6	0.6	3	7	2	61.73	134.07	1.93	0.05	-0.52	-1.25	-0.78	-0.11	-1.56	7.29	0.0273	Very soluble	-2.42	1.02	0.00381	Soluble	-1.16	18.4	0.0687	Soluble	High	No	No	No	No	No	No	No	-7.89	0	1	0	1	0	0.55	1	3	0	3.93
ZINC3978083	COc1cc2CC[NH+]([C@@H]3c2cc1Oc1cc(ccc1O)C[C@@H]1c2c(CC[N+]1(C)C)cc(c(c2Oc1ccc(C3)cc1)O)OC)C	C37H42N2O6++	610.74	45	24	0.35	2	6	3	183.96	81.82	-6.81	6.03	3.87	-3.82	2.7	0.4	-7.69	1.25e-05	2.05e-08	Poorly soluble	-7.53	1.82e-05	2.97e-08	Poorly soluble	-11.24	3.51e-09	5.75e-12	Insoluble	High	No	Yes	No	No	No	No	Yes	-5.74	1	3	0	0	2	0.55	0	1	2	7.15
ZINC3995315	CNC(=O)Oc1ccc2c(c1)[C@]1(C)CC[NH+]([C@H]1N2C)C	C15H22N3O2+	276.35	20	6	0.53	3	2	2	85.9	46.01	2.81	1.58	-0.4	-1.64	0.93	0.66	-2.57	0.739	0.00267	Soluble	-2.16	1.93	0.00697	Soluble	-3.22	0.167	0.000604	Soluble	High	No	Yes	No	No	No	No	No	-6.86	0	1	0	0	0	0.55	0	0	0	3.6
ZINC4045293	OC[C@H]1O[C@@H](C[C@@H]1O)n1cc(F)c(=O)[nH]c1=O	C9H11FN2O5	246.19	17	6	0.56	2	6	3	53.07	104.55	1.1	-1.16	-1.59	-0.62	-0.07	-0.47	-0.76	42.3	0.172	Very soluble	-0.54	70.5	0.286	Very soluble	-0.34	113	0.457	Soluble	High	No	No	No	No	No	No	No	-8.63	0	1	0	0	0	0.55	0	0	1	3.61
ZINC4062829	O=C1CC[C@@H]2C(=C1)CC[C@@H]1[C@@H]2CC[C@]2([C@H]1CC[C@@H]2O)C	C18H26O2	274.4	20	0	0.83	0	2	1	80.81	37.3	2.78	2.62	3.49	3.36	3.1	3.07	-3.19	0.176	0.000643	Soluble	-3.05	0.243	0.000885	Soluble	-2.88	0.36	0.00131	Soluble	High	Yes	No	No	No	No	No	No	-6.11	0	0	0	0	0	0.55	0	0	0	4.51
ZINC4164422	C[C@H]1O[C@@H]([C@H]([C@@H]1O)O)n1cc(F)c(=O)[nH]c1=O	C9H11FN2O5	246.19	17	6	0.56	1	6	3	53.07	104.55	1.07	-1.89	-1.59	-0.62	-0.36	-0.68	-0.37	105	0.426	Very soluble	0.21	403	1.64	Highly soluble	-0.09	199	0.809	Soluble	High	No	No	No	No	No	No	No	-9.14	0	1	0	0	0	0.55	0	0	1	3.81
ZINC4164459	O=C1C[C@H]2OCC=C3[C@H]4[C@@H]2[C@@H]2N1c1ccccc1[C@]12CC[NH+]([C@H]1C4)C3	C21H23N2O2+	335.42	25	6	0.57	0	2	1	102.02	33.98	2.77	1.93	-0.09	-0.97	1.77	1.08	-3.31	0.163	0.000486	Soluble	-2.27	1.81	0.0054	Soluble	-3.4	0.134	0.000398	Soluble	High	No	Yes	No	No	No	No	No	-6.98	0	0	0	0	0	0.55	0	1	0	5.13
ZINC4165550	OCC[NH+]1C[C@@H](O)[C@H]([C@H]([C@@H]1CO)O)O	C8H18NO5+	208.23	14	0	1	3	5	6	52.04	105.59	0.99	-2.57	-5.06	-6.16	-2.15	-2.99	0.69	1010	4.85	Highly soluble	0.9	1650	7.91	Highly soluble	1.97	19500	93.5	Soluble	Low	No	Yes	No	No	No	No	No	-9.39	1	1	0	0	2	0.55	0	0	1	3.32
ZINC4215367	CO[C@@H]1C[NH+](CCCOc2ccc(cc2)F)CC[C@@H]1NC(=O)c1cc(Cl)c(cc1OC)N	C23H30ClFN3O4+	466.95	32	12	0.43	10	5	3	126.52	87.25	3.67	3.4	1.99	-1.48	3.53	2.22	-4.49	0.015	3.2e-05	Moderately soluble	-4.91	0.00572	1.23e-05	Moderately soluble	-6.78	7.68e-05	1.64e-07	Poorly soluble	High	No	Yes	No	No	No	Yes	Yes	-6.73	0	0	0	0	0	0.55	0	1	2	4.15
ZINC4228277	C[C@@H]1CC[C@H]([C@H](C1)O)C(C)C	C10H20O	156.27	11	0	1	1	1	1	49.23	20.23	2.44	3.4	2.44	2.45	2.06	2.56	-2.88	0.204	0.0013	Soluble	-3.5	0.0489	0.000313	Soluble	-1.48	5.22	0.0334	Soluble	High	Yes	No	No	No	No	No	No	-4.84	0	1	0	0	2	0.55	0	0	1	2.63
ZINC4676376	CO/N=C(\C(=O)N[C@@H]1C(=O)N2[C@H]1SCC(=C2C(=O)[O-])CSc1nnnn1C)/c1csc(n1)N	C16H16N9O5S3-	510.55	33	10	0.38	9	10	2	120.93	272.48	1.84	0.03	-2.58	-0.31	-0.71	-0.35	-2.65	1.13	0.00222	Soluble	-5.3	0.00253	4.96e-06	Moderately soluble	-1.53	15	0.0294	Soluble	Low	No	Yes	No	No	No	No	No	-9.39	2	2	1	1	1	0.11	0	2	2	4.89
ZINC5133853	C1CC[C@@H]2[NH+](C1)C[C@@H]1C[C@H]2C[NH+]2[C@H]1CCCC2	C15H28N2++	236.4	17	0	1	0	0	2	81.31	8.88	3.13	2.54	-1.25	-4.48	1.69	0.33	-2.91	0.294	0.00124	Soluble	-2.37	1	0.00423	Soluble	-1.79	3.79	0.016	Soluble	Low	No	Yes	No	No	No	No	No	-5.94	0	1	0	0	0	0.55	0	0	1	3.37
ZINC5260860	O=C(N[C@H]1C(=O)N2[C@H]1SC([C@H]2C(=O)[O-])(C)C)COc1ccccc1	C16H17N2O5S-	349.38	24	6	0.44	6	5	1	89.44	124.07	1.76	2.09	-1.02	1.02	0.57	0.89	-3.11	0.27	0.000773	Soluble	-4.33	0.0165	4.73e-05	Moderately soluble	-2.67	0.754	0.00216	Soluble	High	No	No	No	Yes	No	No	No	-6.95	0	1	0	0	0	0.56	0	0	0	4.05
ZINC5273673	C[C@@H](C(=O)N[C@H]1C(=O)N2[C@H]1SC([C@H]2C(=O)[O-])(C)C)Oc1ccccc1	C17H19N2O5S-	363.41	25	6	0.47	6	5	1	94.25	124.07	1.93	2.2	-0.63	1.26	0.79	1.11	-3.26	0.199	0.000549	Soluble	-4.44	0.0132	3.63e-05	Moderately soluble	-2.69	0.747	0.00206	Soluble	High	No	No	No	No	No	No	No	-6.95	0	1	0	0	0	0.56	0	0	1	4.3
ZINC5273674	C[C@H](C(=O)N[C@H]1C(=O)N2[C@H]1SC([C@H]2C(=O)[O-])(C)C)Oc1ccccc1	C17H19N2O5S-	363.41	25	6	0.47	6	5	1	94.25	124.07	2.3	2.2	-0.63	1.26	0.79	1.18	-3.26	0.199	0.000549	Soluble	-4.44	0.0132	3.63e-05	Moderately soluble	-2.69	0.747	0.00206	Soluble	High	No	No	No	Yes	No	No	No	-6.95	0	1	0	0	0	0.56	0	0	1	4.3
ZINC5275870	C#C[C@]1(O)CC[C@@H]2[C@@]1(C)CC[C@H]1[C@H]2CCc2c1ccc(c2)O	C20H24O2	296.4	22	6	0.6	0	2	2	88.84	40.46	2.89	3.67	3.69	3.9	3.94	3.62	-4.19	0.0191	6.43e-05	Moderately soluble	-4.21	0.0183	6.18e-05	Moderately soluble	-4.04	0.0269	9.08e-05	Moderately soluble	High	Yes	Yes	No	No	Yes	Yes	No	-5.5	0	0	0	0	0	0.55	0	1	1	4.01
ZINC5275963	C#C[C@]1(O)CC[C@@H]2[C@@]1(C)CC[C@H]1[C@H]2CCC2=CC(=O)CC[C@@H]12	C20H26O2	298.42	22	0	0.75	0	2	1	88.63	37.3	3.04	2.97	3.57	3.73	3.78	3.42	-3.56	0.0819	0.000275	Soluble	-3.42	0.114	0.000383	Soluble	-3.17	0.199	0.000668	Soluble	High	Yes	No	No	No	Yes	No	No	-6.01	0	0	0	0	0	0.55	0	1	0	5.01
ZINC5276790	C#C[C@]1(O)CC[C@@H]2[C@]1(C)CC[C@H]1[C@H]2CCC2=CC(=O)CC[C@@H]12	C20H26O2	298.42	22	0	0.75	0	2	1	88.63	37.3	2.95	2.97	3.57	3.73	3.78	3.4	-3.56	0.0819	0.000275	Soluble	-3.42	0.114	0.000383	Soluble	-3.17	0.199	0.000668	Soluble	High	Yes	No	No	No	Yes	No	No	-6.01	0	0	0	0	0	0.55	0	1	0	5.01
ZINC5497159	[NH3+][C@@H](c1ccccc1)C(=O)N[C@@H]1C(=O)N2[C@@H]1SC([C@H]2C(=O)[O-])(C)C	C16H19N3O4S	349.4	24	6	0.44	5	4	2	91.88	142.48	1.45	-1.13	-2.44	-2.93	0.01	-1.01	-1.15	24.8	0.0709	Very soluble	-1.37	14.9	0.0426	Very soluble	-2.21	2.15	0.00615	Soluble	Low	No	No	No	No	No	No	No	-9.23	0	1	1	1	0	0.55	0	0	0	4.16
ZINC5620508	OC[C@@H]1O[C@@H](O)[C@@H]([C@H]([C@@H]1O)O)[NH3+]	C6H14NO5+	180.18	12	0	1	1	5	5	38.54	117.79	0.2	-3.5	-3.97	-6.44	-2.54	-3.25	1.31	3710	20.6	Highly soluble	1.61	7290	40.5	Highly soluble	2.4	45200	251	Soluble	Low	No	Yes	No	No	No	No	No	-9.88	0	2	0	0	2	0.55	0	0	1	3.98
ZINC5765543	O=C([C@H](c1cscc1)C(=O)[O-])N[C@@H]1C(=O)N2[C@@H]1SC([C@H]2C(=O)[O-])(C)C	C15H14N2O6S2--	382.41	25	5	0.47	6	6	1	90.43	183.21	1.09	0.81	-2.5	0.48	0.84	0.14	-2.47	1.29	0.00336	Soluble	-4.24	0.022	5.77e-05	Moderately soluble	-1.19	24.9	0.065	Soluble	Low	No	No	No	No	No	No	No	-8.06	0	1	1	1	1	0.11	0	1	1	4.31
ZINC5920288	C#C[C@]1(O)CC[C@@H]2[C@@]1(C)CC[C@H]1[C@H]2CCc2c1ccc(c2)OC	C21H26O2	310.43	23	6	0.62	1	2	1	93.31	29.46	3.49	4	4	4.13	4.47	4.02	-4.41	0.012	3.88e-05	Moderately soluble	-4.32	0.0148	4.78e-05	Moderately soluble	-4.74	0.00567	1.83e-05	Moderately soluble	High	Yes	No	No	No	Yes	Yes	No	-5.35	0	0	0	0	0	0.55	0	1	1	4.11
ZINC6008178	C[NH+](CCC=C1c2ccccc2Sc2c1cc(Cl)cc2)C	C18H19ClNS+	316.87	21	12	0.22	3	0	1	93.53	29.74	3.77	5.18	3.77	1.21	5.16	3.82	-5.29	0.00161	5.1e-06	Moderately soluble	-5.55	0.000891	2.81e-06	Moderately soluble	-6.84	4.54e-05	1.43e-07	Poorly soluble	High	Yes	No	Yes	No	Yes	Yes	No	-4.56	0	0	0	0	1	0.55	1	0	1	3.25
ZINC6072455	OC[C@H]1O[C@@H](C[C@@H]1O)n1cc(C)c(=O)[nH]c1=O	C10H14N2O5	242.23	17	6	0.6	2	5	3	58.07	104.55	1.08	-1.17	-1.84	-1.15	-0.04	-0.62	-0.73	44.7	0.185	Very soluble	-0.53	71.1	0.293	Very soluble	-0.45	86.3	0.356	Soluble	High	No	No	No	No	No	No	No	-8.61	0	1	0	0	0	0.55	0	0	1	3.64
ZINC6507068	C#CC[NH+](Cc1ccccc1)C	C11H14N+	160.24	12	6	0.27	3	0	1	52.95	4.44	2.39	2.09	0.26	-0.99	2.27	1.2	-2.32	0.763	0.00476	Soluble	-1.81	2.46	0.0154	Very soluble	-3	0.16	0.000998	Soluble	Low	No	No	Yes	No	No	No	No	-5.79	0	0	0	0	2	0.55	0	1	1	1.77
ZINC6845076	C/C(=C\C=C\C=C(\C=C\C=C(\C=C\C1=C(C)CCCC1(C)C)/C)/C)/C=C/C=C(/C=C/C1=C(C)CCCC1(C)C)\C	C40H56	536.87	40	0	0.45	10	0	0	184.43	0	2.39	2.09	12.61	-0.99	2.27	1.2	-2.32	0.763	0.00476	Soluble	-1.81	2.46	0.0154	Very soluble	-3	0.16	0.000998	Soluble	Low	No	No	Yes	No	No	No	No	-5.79	0	0	0	0	2	0.55	0	1	1	1.77
ZINC6852897	CCCCC[C@@H](/C=C/[C@@H]1[C@@H](O)CC(=O)[C@@H]1CCCCCCC(=O)[O-])O	C20H33O5-	353.47	25	0	0.8	13	5	2	98.02	97.66	3.17	3.2	2.14	1.98	4.1	2.92	-3.19	0.228	0.000646	Soluble	-4.92	0.00422	1.19e-05	Moderately soluble	-3.22	0.213	0.000603	Soluble	High	No	Yes	No	No	No	Yes	No	-6.18	0	0	1	0	0	0.56	0	1	2	4.87
ZINC6920406	[O-]C(=O)CC[C@H](C(=O)[O-])NC(=O)c1ccc(cc1)N(Cc1cnc2c(n1)c(N)nc(n2)N)C	C20H20N8O5--	452.42	33	16	0.25	10	9	3	114.51	216.2	1.42	-1.85	-2.54	-1.13	-0.66	-0.95	-1.18	30	0.0663	Very soluble	-2.17	3.05	0.00674	Soluble	-3.99	0.0465	0.000103	Soluble	Low	No	No	No	No	No	No	No	-10.37	1	1	1	1	1	0.11	0	0	2	3.51
ZINC8034263	NC(=O)C1=C(O)[C@@H]([NH+](C)C)[C@H]2[C@@](C1=O)(O)C(=C1[C@H]([C@@H]2O)C(=C)c2c(C1=O)c(O)ccc2)O	C22H23N2O8+	443.43	32	6	0.32	2	8	7	111.91	182.82	1.47	-0.8	-1.85	-5.84	-0.71	-1.55	-2.09	3.59	0.00809	Soluble	-2.56	1.22	0.00275	Soluble	-1.6	11	0.0248	Soluble	Low	No	No	No	No	No	No	No	-9.57	1	1	1	1	2	0.11	0	1	1	5.09
ZINC8035451	O[C@H](C(=O)N[C@@H]1C(=O)N2[C@H]1SCC(=C2C(=O)[O-])CSc1nnnn1C)c1ccccc1	C18H17N6O5S2-	461.49	31	11	0.33	8	8	2	112.44	203.97	1.57	0.5	-2.27	0.97	-0.72	0.01	-2.75	0.819	0.00177	Soluble	-4.35	0.0205	4.43e-05	Moderately soluble	-2.3	2.31	0.00501	Soluble	Low	No	No	No	No	No	No	No	-8.76	1	1	1	1	1	0.11	0	0	2	4.81
ZINC8071079	OC[C@@H]1O[C@H](C[C@@H]1O)n1cnc2c1N=CNC[C@@H]2O	C11H16N4O4	268.27	19	5	0.64	2	6	4	72.08	112.13	1.2	-2.68	-2.59	-1.65	-1.22	-1.39	0.12	356	1.33	Highly soluble	0.88	2010	7.5	Highly soluble	0.28	517	1.93	Soluble	Low	No	No	No	No	No	No	No	-9.84	0	1	0	0	1	0.55	0	0	0	4.77
ZINC8101114	C[NH2+][C@H]([C@@H]1CC[C@@H]([C@@H](O1)O[C@@H]1[C@H]([NH3+])C[C@@H]([C@@H]([C@@H]1O)O[C@H]1OC[C@]([C@H]([C@H]1O)[NH2+]C)(C)O)[NH3+])[NH3+])C	C21H48N5O7+++++	482.64	33	0	1	7	7	8	124.6	213.75	2.99	-4.1	-7.53	-21.34	-3.56	-6.71	0.21	788	1.63	Highly soluble	0.21	791	1.64	Highly soluble	0.52	1580	3.27	Soluble	Low	No	Yes	No	No	No	No	No	-12.16	2	3	1	1	3	0.17	0	0	1	6.71
ZINC8101115	C[NH2+][C@@H]([C@@H]1CC[C@@H]([C@@H](O1)O[C@@H]1[C@H]([NH3+])C[C@@H]([C@@H]([C@@H]1O)O[C@H]1OC[C@]([C@H]([C@H]1O)[NH2+]C)(C)O)[NH3+])[NH3+])C	C21H48N5O7+++++	482.64	33	0	1	7	7	8	124.6	213.75	1.83	-4.1	-7.53	-21.34	-3.56	-6.94	0.21	788	1.63	Highly soluble	0.21	791	1.64	Highly soluble	0.52	1580	3.27	Soluble	Low	No	Yes	No	No	No	No	No	-12.16	2	3	1	1	3	0.17	0	0	1	6.71
ZINC8101117	C[NH2+][C@@H]([C@H]1CC[C@@H]([C@@H](O1)O[C@@H]1[C@H]([NH3+])C[C@@H]([C@@H]([C@@H]1O)O[C@H]1OC[C@]([C@H]([C@H]1O)[NH2+]C)(C)O)[NH3+])[NH3+])C	C21H48N5O7+++++	482.64	33	0	1	7	7	8	124.6	213.75	2.18	-4.1	-7.53	-21.34	-3.56	-6.87	0.21	788	1.63	Highly soluble	0.21	791	1.64	Highly soluble	0.52	1580	3.27	Soluble	Low	No	Yes	No	No	No	No	No	-12.16	2	3	1	1	3	0.17	0	0	1	6.71
ZINC8101161	CCCCCCCCCCC[C@@H](C[C@@H]1OC(=O)[C@H]1CCCCCC)OC(=O)[C@@H](CC(C)C)NC=O	C29H53NO5	495.73	35	0	0.9	24	5	1	145.36	81.7	5.37	9.96	6.88	4.66	8.31	7.04	-7.6	1.23e-05	2.49e-08	Poorly soluble	-11.6	1.24e-09	2.5e-12	Insoluble	-7.97	5.31e-06	1.07e-08	Poorly soluble	Low	No	Yes	No	No	Yes	No	No	-2.25	1	4	1	1	2	0.55	0	3	3	5.42
ZINC8101162	CCCCCCCCCCC[C@H](C[C@@H]1OC(=O)[C@H]1CCCCCC)OC(=O)[C@@H](CC(C)C)NC=O	C29H53NO5	495.73	35	0	0.9	24	5	1	145.36	81.7	4.66	9.96	6.88	4.66	8.31	6.89	-7.6	1.23e-05	2.49e-08	Poorly soluble	-11.6	1.24e-09	2.5e-12	Insoluble	-7.97	5.31e-06	1.07e-08	Poorly soluble	Low	No	Yes	No	No	Yes	No	No	-2.25	1	4	1	1	2	0.55	0	3	3	5.42
ZINC8132748	CC(Cc1ccccc1)([NH2+]C)C	C11H18N+	164.27	12	6	0.45	3	0	1	54.73	16.61	2.46	2.41	1.2	-0.9	2.56	1.54	-2.55	0.464	0.00283	Soluble	-2.4	0.653	0.00397	Soluble	-4.05	0.0145	8.83e-05	Moderately soluble	High	Yes	No	Yes	No	No	No	No	-5.59	0	0	0	0	2	0.55	0	0	1	1
ZINC8551106	O=c1[nH]c(=O)c2c(n1)n(C[C@@H]([C@H]([C@H](COP(=O)([O-])[O-])O)O)O)c1c(n2)cc(c(c1)C)C	C17H19N4O9P--	454.33	31	14	0.41	7	11	4	104.84	223.56	-1.05	-2.56	-0.68	-1.25	-0.05	-1.12	-0.92	55.1	0.121	Very soluble	-1.59	11.7	0.0257	Very soluble	-1.73	8.44	0.0186	Soluble	Low	No	No	No	No	No	No	No	-10.89	1	1	1	1	3	0.11	0	2	1	4.34
ZINC8551107	O=c1[nH]c(=O)c2c(n1)n(C[C@H]([C@@H]([C@H](COP(=O)([O-])[O-])O)O)O)c1c(n2)cc(c(c1)C)C	C17H19N4O9P--	454.33	31	14	0.41	7	11	4	104.84	223.56	0.21	-2.56	-0.68	-1.25	-0.05	-0.87	-0.92	55.1	0.121	Very soluble	-1.59	11.7	0.0257	Very soluble	-1.73	8.44	0.0186	Soluble	Low	No	No	No	No	No	No	No	-10.89	1	1	1	1	3	0.11	0	2	1	4.34
ZINC8551464	O=C1CC[C@@H]2[C@]1(C)CC[C@@H]1[C@H]2CCc2c1ccc(c2)OS(=O)(=O)[O-]	C18H21O5S-	349.42	24	6	0.61	2	5	0	88.41	91.88	3.18	2.54	4.03	2.74	2.16	2.93	-3.66	0.0765	0.000219	Soluble	-4.12	0.0267	7.65e-05	Moderately soluble	-4.07	0.0298	8.53e-05	Moderately soluble	High	No	Yes	No	Yes	No	No	No	-6.63	0	0	0	0	0	0.56	0	2	0	3.99
ZINC8551994	CCC[C@@H]1C[NH+]([C@@H](C1)C(=O)N[C@H]([C@@H]1O[C@@H](SC)[C@H]([C@H]([C@@H]1O)O)O)[C@H](Cl)C)C	C18H34ClN2O5S+	425.99	27	0	0.94	8	5	5	112.14	128.76	3.55	2.16	-1.41	-3.75	0.65	0.24	-3.31	0.207	0.000485	Soluble	-4.5	0.0136	3.19e-05	Moderately soluble	-1.2	27	0.0634	Soluble	Low	No	Yes	No	No	No	No	No	-7.36	0	1	0	0	0	0.55	0	1	2	5.68
ZINC8551996	CCC[C@@H]1C[NH+]([C@H](C1)C(=O)N[C@H]([C@@H]1O[C@@H](SC)[C@H]([C@H]([C@@H]1O)O)O)[C@H](Cl)C)C	C18H34ClN2O5S+	425.99	27	0	0.94	8	5	5	112.14	128.76	2.67	2.16	-1.41	-3.75	0.65	0.06	-3.31	0.207	0.000485	Soluble	-4.5	0.0136	3.19e-05	Moderately soluble	-1.2	27	0.0634	Soluble	Low	No	Yes	No	No	No	No	No	-7.36	0	1	0	0	0	0.55	0	1	2	5.68
ZINC8552290	CCCCC[C@H](/C=C/[C@@H]1[C@@H](O)C[C@H]([C@@H]1C/C=C\CCCC(=O)[O-])O)O	C20H33O5-	353.47	25	0	0.75	12	5	3	98.51	100.82	2.41	2.72	1.71	1.98	3.33	2.43	-2.95	0.394	0.00111	Soluble	-4.49	0.0114	3.23e-05	Moderately soluble	-1.81	5.53	0.0156	Soluble	High	No	Yes	No	No	No	No	No	-6.52	0	0	1	0	0	0.56	0	1	2	5
ZINC8552292	CCCCC[C@H](/C=C/[C@H]1[C@@H](O)C[C@H]([C@@H]1C/C=C\CCCC(=O)[O-])O)O	C20H33O5-	353.47	25	0	0.75	12	5	3	98.51	100.82	3.23	2.72	1.71	1.98	3.33	2.59	-2.95	0.394	0.00111	Soluble	-4.49	0.0114	3.23e-05	Moderately soluble	-1.81	5.53	0.0156	Soluble	High	No	Yes	No	No	No	No	No	-6.52	0	0	1	0	0	0.56	0	1	2	5
ZINC8575811	C[C@H]([NH2+][C@@H]([C@H](c1ccc(cc1)O)O)C)CCc1ccccc1	C19H26NO2+	300.42	22	12	0.37	7	2	3	91.98	57.07	2.98	3.46	2.07	-0.66	3.71	2.31	-3.82	0.0451	0.00015	Soluble	-4.34	0.0137	4.57e-05	Moderately soluble	-5.54	0.000876	2.92e-06	Moderately soluble	High	Yes	Yes	No	No	No	Yes	No	-5.68	0	0	0	0	0	0.55	0	0	0	2.98
ZINC9212278	C[C@@H]([NH2+][C@@H]([C@H](c1ccc(cc1)O)O)C)CCc1ccccc1	C19H26NO2+	300.42	22	12	0.37	7	2	3	91.98	57.07	2.98	3.46	2.07	-0.66	3.71	2.31	-3.82	0.0451	0.00015	Soluble	-4.34	0.0137	4.57e-05	Moderately soluble	-5.54	0.000876	2.92e-06	Moderately soluble	High	Yes	Yes	No	No	No	Yes	No	-5.68	0	0	0	0	0	0.55	0	0	0	2.98
ZINC9231861	C[NH2+]C[C@@H]([C@H]([C@H]([C@H](CO)O)O)O)O	C7H18NO5+	196.22	13	0	1	6	5	6	45.63	117.76	0.72	-2.85	-4.38	-6.1	-1.72	-2.87	1.13	2680	13.6	Highly soluble	0.93	1680	8.58	Highly soluble	1.55	6930	35.3	Soluble	Low	No	No	No	No	No	No	No	-9.52	1	1	0	0	3	0.55	0	0	1	3.17
ZINC11330186	COCc1c(c2ccc(cc2)F)c(/C=C/[C@H](C[C@H](CC(=O)[O-])O)O)c(nc1C(C)C)C(C)C	C26H33FNO5-	458.54	33	12	0.46	11	7	2	125.93	102.71	2.8	3.58	3.71	2.4	6.18	3.73	-4.48	0.0151	3.3e-05	Moderately soluble	-5.42	0.00173	3.78e-06	Moderately soluble	-6.09	0.000376	8.2e-07	Poorly soluble	High	No	Yes	No	No	No	No	No	-6.56	0	0	1	0	0	0.56	0	0	3	4.78
ZINC11565587	OC[C@@H]([C@H]([C@@H](Cn1c2cc(C)c(cc2nc2c1nc(=O)[nH]c2=O)C)O)O)O	C17H20N4O6	376.36	27	14	0.41	5	8	5	96.99	161.56	1.34	-1.46	-1.68	-0.54	1.09	-0.25	-1.31	18.5	0.0493	Very soluble	-1.43	14	0.0372	Very soluble	-2.62	0.903	0.0024	Soluble	Low	No	No	No	No	No	No	No	-9.63	0	1	1	1	1	0.55	0	1	1	3.84
ZINC11592581	O=C1C=C[C@@]2(C(=C1)CC[C@@H]1[C@@H]2CC[C@@]2([C@H]1CCC(=O)O2)C)C	C19H24O3	300.39	22	0	0.68	0	3	0	85.31	43.37	2.66	3.03	3.59	3.34	3.36	3.2	-3.61	0.0735	0.000245	Soluble	-3.61	0.0744	0.000248	Soluble	-3.44	0.108	0.000359	Soluble	High	Yes	No	No	No	Yes	No	No	-5.98	0	0	0	0	0	0.55	0	0	0	4.48
ZINC11592588	O[C@H]1CC[C@@]2([C@@H](C1)C[C@@H]([C@@H]1[C@H]2CC[C@@]2([C@@H]1CC[C@H]2[C@H](CCC(=O)[O-])C)C)O)C	C24H39O4-	391.56	28	0	0.96	4	4	2	110.66	80.59	3.02	3.08	3.14	3.88	3.42	3.31	-3.94	0.0445	0.000114	Soluble	-4.44	0.0142	3.63e-05	Moderately soluble	-3.13	0.29	0.00074	Soluble	High	No	Yes	No	No	No	No	No	-6.5	0	0	0	0	0	0.56	0	0	1	4.89
ZINC11592591	O[C@H]1CC[C@@]2([C@@H](C1)C[C@@H]([C@@H]1[C@H]2CC[C@@]2([C@@H]1CC[C@@H]2[C@@H](CCC(=O)[O-])C)C)O)C	C24H39O4-	391.56	28	0	0.96	4	4	2	110.66	80.59	3.11	3.08	3.14	3.88	3.42	3.33	-3.94	0.0445	0.000114	Soluble	-4.44	0.0142	3.63e-05	Moderately soluble	-3.13	0.29	0.00074	Soluble	High	No	Yes	No	No	No	No	No	-6.5	0	0	0	0	0	0.56	0	0	1	4.89
ZINC11592603	C#C[C@]1(O)CC[C@@H]2[C@@]1(C)CC[C@@H]1[C@H]2CCC2=CC(=O)CC[C@@H]12	C20H26O2	298.42	22	0	0.75	0	2	1	88.63	37.3	2.94	2.97	3.57	3.73	3.78	3.4	-3.56	0.0819	0.000275	Soluble	-3.42	0.114	0.000383	Soluble	-3.17	0.199	0.000668	Soluble	High	Yes	No	No	No	Yes	No	No	-6.01	0	0	0	0	0	0.55	0	1	0	5.01
ZINC11592604	C#C[C@]1(O)CC[C@@H]2[C@]1(C)CC[C@@H]1[C@H]2CCC2=CC(=O)CC[C@@H]12	C20H26O2	298.42	22	0	0.75	0	2	1	88.63	37.3	2.84	2.97	3.57	3.73	3.78	3.38	-3.56	0.0819	0.000275	Soluble	-3.42	0.114	0.000383	Soluble	-3.17	0.199	0.000668	Soluble	High	Yes	No	No	No	Yes	No	No	-6.01	0	0	0	0	0	0.55	0	1	0	5.01
ZINC11592618	NC(=O)C1=C(O)[C@H]([NH+](C)C)[C@H]2[C@@](C1=O)(O)C(=C1[C@@H](C2)[C@](C)(O)c2c(C1=O)c(O)ccc2)O	C22H25N2O8+	445.44	32	6	0.41	2	8	7	111.48	182.82	0.6	-1.85	-1.74	-5.77	-0.59	-1.87	-1.44	16.1	0.0361	Very soluble	-1.47	15.1	0.0338	Very soluble	-1.82	6.7	0.015	Soluble	Low	No	No	No	No	No	No	No	-10.33	1	1	1	1	2	0.11	0	1	1	5.08
ZINC11592620	NC(=O)C1=C(O)[C@@H]([NH+](C)C)[C@@H]2[C@@](C1=O)(O)C(=C1[C@@H](C2)[C@](C)(O)c2c(C1=O)c(O)ccc2)O	C22H25N2O8+	445.44	32	6	0.41	2	8	7	111.48	182.82	1.52	-1.85	-1.74	-5.77	-0.59	-1.69	-1.44	16.1	0.0361	Very soluble	-1.47	15.1	0.0338	Very soluble	-1.82	6.7	0.015	Soluble	Low	No	No	No	No	No	No	No	-10.33	1	1	1	1	2	0.11	0	1	1	5.08
ZINC11592621	[NH3+][C@@H](c1ccccc1)C(=O)N[C@@H]1C(=O)N2[C@H]1SC([C@H]2C(=O)[O-])(C)C	C16H19N3O4S	349.4	24	6	0.44	5	4	2	91.88	142.48	1.74	-1.13	-2.44	-2.93	0.01	-0.95	-1.15	24.8	0.0709	Very soluble	-1.37	14.9	0.0426	Very soluble	-2.21	2.15	0.00615	Soluble	Low	No	No	No	No	No	No	No	-9.23	0	1	1	1	0	0.55	0	0	0	4.16
ZINC11592622	NC(=O)C1=C(O)[C@H]([NH+](C)C)[C@H]2[C@@](C1=O)(O)C(=C1[C@@H]([C@@H]2O)[C@](C)(O)c2c(C1=O)c(O)ccc2)O	C22H25N2O9+	461.44	33	6	0.41	2	9	8	112.64	203.05	1.68	-1.45	-2.77	-6.53	-1.47	-2.11	-1.79	7.48	0.0162	Very soluble	-2.31	2.26	0.00489	Soluble	-1	46	0.0998	Soluble	Low	No	No	No	No	No	No	No	-10.14	2	1	1	1	2	0.11	0	1	1	5.24
ZINC11592624	NC(=O)C1=C(O)[C@H]([NH+](C)C)[C@@H]2[C@@](C1=O)(O)C(=C1[C@@H]([C@@H]2O)[C@](C)(O)c2c(C1=O)c(O)ccc2)O	C22H25N2O9+	461.44	33	6	0.41	2	9	8	112.64	203.05	1.27	-1.45	-2.77	-6.53	-1.47	-2.19	-1.79	7.48	0.0162	Very soluble	-2.31	2.26	0.00489	Soluble	-1	46	0.0998	Soluble	Low	No	No	No	No	No	No	No	-10.14	2	1	1	1	2	0.11	0	1	1	5.24
ZINC11592626	CCC[C@H]1C[NH+]([C@@H](C1)C(=O)N[C@H]([C@@H]1O[C@@H](SC)[C@H]([C@H]([C@@H]1O)O)O)[C@H](O)C)C	C18H35N2O6S+	407.55	27	0	0.94	8	6	6	108.51	148.99	2.77	0.2	-2.65	-4.77	-0.47	-0.99	-1.96	4.42	0.0108	Very soluble	-2.89	0.528	0.0013	Soluble	-0.02	386	0.946	Soluble	Low	No	Yes	No	No	No	No	No	-8.64	1	1	1	1	1	0.55	0	0	2	5.64
ZINC11592629	CCC[C@@H]1C[NH+]([C@H](C1)C(=O)N[C@H]([C@@H]1O[C@@H](SC)[C@H]([C@H]([C@@H]1O)O)O)[C@H](O)C)C	C18H35N2O6S+	407.55	27	0	0.94	8	6	6	108.51	148.99	2.2	0.2	-2.65	-4.77	-0.47	-1.1	-1.96	4.42	0.0108	Very soluble	-2.89	0.528	0.0013	Soluble	-0.02	386	0.946	Soluble	Low	No	Yes	No	No	No	No	No	-8.64	1	1	1	1	1	0.55	0	0	2	5.64
ZINC11592648	C[NH+]([C@H]1C(=C(C(=O)N)C(=O)[C@]2([C@@H]1C[C@H]1C(=C2O)C(=O)c2c([C@@H]1O)c(Cl)ccc2O)O)O)C	C21H22ClN2O8+	465.86	32	6	0.38	2	8	7	111.8	182.82	0.29	-0.56	-1.48	-5.5	-0.45	-1.54	-2.38	1.93	0.00415	Soluble	-2.81	0.723	0.00155	Soluble	-1.81	7.18	0.0154	Soluble	Low	No	No	No	No	No	No	No	-9.54	1	1	1	1	2	0.11	0	1	1	4.96
ZINC11592731	CCN1CCN(C(=O)C1=O)C(=O)N[C@@H](C(=O)N[C@H]1C(=O)N2[C@H]1SC([C@H]2C(=O)[O-])(C)C)c1ccccc1	C23H26N5O7S-	516.55	36	6	0.48	9	7	2	136.86	184.56	0.17	0.5	-3.04	-0.11	-0.69	-0.63	-2.89	0.67	0.0013	Soluble	-3.95	0.0585	0.000113	Soluble	-2.76	0.894	0.00173	Soluble	Low	No	No	No	No	No	No	No	-9.1	2	3	1	1	1	0.11	0	1	2	4.87
ZINC11592733	CCN1CCN(C(=O)C1=O)C(=O)N[C@H](C(=O)N[C@@H]1C(=O)N2[C@H]1SC([C@H]2C(=O)[O-])(C)C)c1ccccc1	C23H26N5O7S-	516.55	36	6	0.48	9	7	2	136.86	184.56	1.79	0.5	-3.04	-0.11	-0.69	-0.31	-2.89	0.67	0.0013	Soluble	-3.95	0.0585	0.000113	Soluble	-2.76	0.894	0.00173	Soluble	Low	No	No	No	No	No	No	No	-9.1	2	3	1	1	1	0.11	0	1	2	4.87
ZINC11592734	OCC(=O)[C@]1(O)CC[C@@H]2[C@@]1(C)C[C@@H](O)[C@@H]1[C@H]2CCC2=CC(=O)C=C[C@@]12C	C21H28O5	360.44	26	0	0.71	2	5	3	97.06	94.83	1.8	1.62	1.56	1.3	2.06	1.67	-2.96	0.392	0.00109	Soluble	-3.22	0.215	0.000597	Soluble	-2.17	2.45	0.00681	Soluble	High	No	Yes	No	No	No	No	No	-7.35	0	0	0	0	0	0.55	0	0	1	5.23
ZINC11592737	OCC(=O)[C@]1(O)CC[C@@H]2[C@]1(C)C[C@H](O)[C@@H]1[C@H]2CCC2=CC(=O)C=C[C@@]12C	C21H28O5	360.44	26	0	0.71	2	5	3	97.06	94.83	1.97	1.62	1.56	1.3	2.06	1.7	-2.96	0.392	0.00109	Soluble	-3.22	0.215	0.000597	Soluble	-2.17	2.45	0.00681	Soluble	High	No	Yes	No	No	No	No	No	-7.35	0	0	0	0	0	0.55	0	0	1	5.23
ZINC11592763	[O-][N+](=O)O[C@H]1CO[C@@H]2[C@H]1OC[C@H]2O	C6H9NO6	191.14	13	0	1	2	6	1	39.25	93.74	0.7	-0.4	-1.28	-2.01	-2.54	-1.1	-0.64	43.7	0.229	Very soluble	-1.1	15	0.0786	Very soluble	1.35	4300	22.5	Soluble	High	No	No	No	No	No	No	No	-7.75	0	2	0	0	1	0.55	0	2	1	4.27
ZINC11592790	NC(=O)C1=C(O)[C@H]([NH+](C)C)[C@@H]2[C@@](C1=O)(O)C(=C1[C@H]([C@@H]2O)C(=C)c2c(C1=O)c(O)ccc2)O	C22H23N2O8+	443.43	32	6	0.32	2	8	7	111.91	182.82	0.84	-0.8	-1.85	-5.84	-0.71	-1.67	-2.09	3.59	0.00809	Soluble	-2.56	1.22	0.00275	Soluble	-1.6	11	0.0248	Soluble	Low	No	No	No	No	No	No	No	-9.57	1	1	1	1	2	0.11	0	1	1	5.09
ZINC11592791	NC(=O)C1=C(O)[C@@H]([NH+](C)C)[C@@H]2[C@@](C1=O)(O)C(=C1[C@H]([C@@H]2O)C(=C)c2c(C1=O)c(O)ccc2)O	C22H23N2O8+	443.43	32	6	0.32	2	8	7	111.91	182.82	1.41	-0.8	-1.85	-5.84	-0.71	-1.56	-2.09	3.59	0.00809	Soluble	-2.56	1.22	0.00275	Soluble	-1.6	11	0.0248	Soluble	Low	No	No	No	No	No	No	No	-9.57	1	1	1	1	2	0.11	0	1	1	5.09
ZINC11592805	O=CO[C@H](C(=O)N[C@@H]1C(=O)N2[C@H]1SCC(=C2C(=O)[O-])CSc1nnnn1C)c1ccccc1	C19H17N6O6S2-	489.5	33	11	0.32	10	9	1	117.76	210.04	2.13	1.09	-2.08	1.19	-0.47	0.37	-3.15	0.348	0.000711	Soluble	-5.09	0.00395	8.07e-06	Moderately soluble	-2.53	1.43	0.00292	Soluble	Low	No	No	No	No	No	No	Yes	-8.51	1	2	1	1	1	0.11	0	1	2	4.85
ZINC11592835	C#C[C@@]1(CC[C@H]2[C@]1(C)CC[C@@H]1[C@H]2CCC2=CC(=O)CC[C@H]12)OC(=O)C	C22H28O3	340.46	25	0	0.73	2	3	0	98.36	43.37	3.37	3.64	4.14	4.01	4.24	3.88	-4.11	0.0263	7.73e-05	Moderately soluble	-4.24	0.0196	5.77e-05	Moderately soluble	-3.8	0.0536	0.000157	Soluble	High	Yes	No	No	No	Yes	No	No	-5.79	0	0	0	0	0	0.55	0	1	1	5.08
ZINC11592839	O=C(O[C@H]1CC[C@@H]2[C@@]1(C)CC[C@@H]1[C@H]2CCC2=CC(=O)CC[C@@H]12)CCc1ccccc1	C27H34O3	406.56	30	6	0.63	5	3	0	119.84	43.37	3.79	5.08	5.67	4.88	5.39	4.96	-5.38	0.0017	4.18e-06	Moderately soluble	-5.73	0.000751	1.85e-06	Moderately soluble	-6.39	0.000166	4.07e-07	Poorly soluble	High	Yes	No	No	No	Yes	Yes	Yes	-5.17	1	1	0	0	1	0.55	0	0	2	4.81
ZINC11592878	CC(=O)OCC(=O)[C@@]1(O)CC[C@H]2[C@]1(C)C[C@H](O)[C@@H]1[C@H]2CCC2=CC(=O)C=C[C@@]12C	C23H30O6	402.48	29	0	0.7	4	6	2	106.8	100.9	2.2	2.4	2.13	1.64	2.56	2.19	-3.58	0.105	0.000261	Soluble	-4.16	0.0278	6.91e-05	Moderately soluble	-2.79	0.66	0.00164	Soluble	High	No	Yes	No	No	No	No	No	-7.05	0	0	0	0	0	0.55	0	0	1	5.25
ZINC11592879	CC(=O)OCC(=O)[C@@]1(O)CC[C@@H]2[C@]1(C)C[C@H](O)[C@@H]1[C@H]2CCC2=CC(=O)C=C[C@@]12C	C23H30O6	402.48	29	0	0.7	4	6	2	106.8	100.9	2.39	2.4	2.13	1.64	2.56	2.22	-3.58	0.105	0.000261	Soluble	-4.16	0.0278	6.91e-05	Moderately soluble	-2.79	0.66	0.00164	Soluble	High	No	Yes	No	No	No	No	No	-7.05	0	0	0	0	0	0.55	0	0	1	5.25
ZINC11592902	CC(=O)OCC(=O)[C@]1(O)CC[C@H]2[C@]1(C)C[C@H](O)[C@]1([C@H]2CCC2=CC(=O)CC[C@@]12C)F	C23H31FO6	422.49	30	0	0.78	4	7	2	107.36	100.9	2.97	1.69	2.86	1.84	3.37	2.55	-3.26	0.232	0.000549	Soluble	-3.42	0.159	0.000377	Soluble	-3.73	0.0779	0.000185	Soluble	High	No	Yes	No	No	No	No	Yes	-7.68	0	0	0	0	0	0.55	0	0	1	5.29
ZINC11592903	CC(=O)OCC(=O)[C@@]1(O)CC[C@@H]2[C@]1(C)C[C@H](O)[C@]1([C@H]2CCC2=CC(=O)CC[C@@]12C)F	C23H31FO6	422.49	30	0	0.78	4	7	2	107.36	100.9	2.48	1.69	2.86	1.84	3.37	2.45	-3.26	0.232	0.000549	Soluble	-3.42	0.159	0.000377	Soluble	-3.73	0.0779	0.000185	Soluble	High	No	Yes	No	No	No	No	No	-7.68	0	0	0	0	0	0.55	0	0	1	5.29
ZINC11592928	COc1cccc2c1C(=O)c1c(C2=O)c(O)c2c(c1O)[C@H](O[C@@H]1C[C@@H]([NH3+])[C@H]([C@H](O1)C)O)C[C@@](C2)(O)C(=O)C	C27H30NO10+	528.53	38	12	0.44	4	10	5	132.76	187.46	2.67	1.83	-0.01	-5.03	1.77	0.25	-4.24	0.0305	5.76e-05	Moderately soluble	-5.39	0.00217	4.1e-06	Moderately soluble	-4.04	0.0483	9.14e-05	Moderately soluble	Low	No	Yes	No	No	No	No	No	-8.22	2	2	1	1	1	0.17	1	1	1	5.81
ZINC11592929	COc1cccc2c1C(=O)c1c(C2=O)c(O)c2c(c1O)[C@@H](O[C@@H]1C[C@@H]([NH3+])[C@H]([C@H](O1)C)O)C[C@](C2)(O)C(=O)C	C27H30NO10+	528.53	38	12	0.44	4	10	5	132.76	187.46	2.5	1.83	-0.01	-5.03	1.77	0.21	-4.24	0.0305	5.76e-05	Moderately soluble	-5.39	0.00217	4.1e-06	Moderately soluble	-4.04	0.0483	9.14e-05	Moderately soluble	Low	No	Yes	No	No	No	No	No	-8.22	2	2	1	1	1	0.17	1	1	1	5.81
ZINC11616249	OC[C@H]1O[C@H](C[C@H]1O)n1cnc2c1nc(Cl)nc2N	C10H12ClN5O3	285.69	19	9	0.5	2	6	3	66.52	119.31	1.21	0.02	-0.61	-0.98	-0.84	-0.24	-1.84	4.11	0.0144	Very soluble	-2.08	2.39	0.00837	Soluble	-1.01	28.2	0.0986	Soluble	High	No	No	No	No	No	No	No	-8.03	0	1	0	0	0	0.55	0	0	0	3.65
ZINC11616269	CC(=O)OCC(=O)[C@@]1(O)[C@H](C)C[C@@H]2[C@@]1(C)C[C@H](O)[C@]1([C@H]2CCC2=CC(=O)C=C[C@@]12C)F	C24H31FO6	434.5	31	0	0.71	4	7	2	111.69	100.9	2.82	2.77	2.89	1.96	3.08	2.7	-4.01	0.042	9.66e-05	Moderately soluble	-4.54	0.0124	2.85e-05	Moderately soluble	-3.41	0.169	0.000388	Soluble	High	No	Yes	No	No	No	No	Yes	-6.98	0	0	0	0	0	0.55	0	0	1	5.51
ZINC11616274	CCCCC(=O)O[C@H]1CC[C@H]2[C@@]1(C)CC[C@@H]1[C@H]2CCc2c1ccc(c2)O	C23H32O3	356.5	26	6	0.7	5	3	1	105.18	46.53	3.71	5.95	5.35	4.49	4.85	4.87	-5.64	0.000818	2.29e-06	Moderately soluble	-6.7	7.07e-05	1.98e-07	Poorly soluble	-5.57	0.000957	2.69e-06	Moderately soluble	High	Yes	No	No	Yes	Yes	Yes	No	-4.25	1	0	0	0	1	0.55	0	0	2	4.16
ZINC11616276	CCCCC(=O)O[C@H]1CC[C@@H]2[C@@]1(C)CC[C@@H]1[C@H]2CCc2c1ccc(c2)O	C23H32O3	356.5	26	6	0.7	5	3	1	105.18	46.53	3.8	5.95	5.35	4.49	4.85	4.89	-5.64	0.000818	2.29e-06	Moderately soluble	-6.7	7.07e-05	1.98e-07	Poorly soluble	-5.57	0.000957	2.69e-06	Moderately soluble	High	Yes	No	No	Yes	Yes	Yes	No	-4.25	1	0	0	0	1	0.55	0	0	2	4.16
ZINC11616399	CCC(=O)Oc1ccc2c(c1)CC[C@@H]1[C@H]2CC[C@@]2([C@H]1CC[C@H]2OC(=O)CC)C	C24H32O4	384.51	28	6	0.67	6	4	0	109.85	52.6	3.99	4.32	5.18	4.58	4.94	4.6	-4.71	0.00753	1.96e-05	Moderately soluble	-5.14	0.00279	7.27e-06	Moderately soluble	-5.8	0.000615	1.6e-06	Moderately soluble	High	Yes	No	No	Yes	Yes	Yes	Yes	-5.58	1	0	0	0	0	0.55	0	1	2	4.47
ZINC11616400	CCC(=O)Oc1ccc2c(c1)CC[C@@H]1[C@H]2CC[C@@]2([C@H]1CC[C@@H]2OC(=O)CC)C	C24H32O4	384.51	28	6	0.67	6	4	0	109.85	52.6	3.96	4.32	5.18	4.58	4.94	4.6	-4.71	0.00753	1.96e-05	Moderately soluble	-5.14	0.00279	7.27e-06	Moderately soluble	-5.8	0.000615	1.6e-06	Moderately soluble	High	Yes	No	No	Yes	Yes	Yes	Yes	-5.58	1	0	0	0	0	0.55	0	1	2	4.47
ZINC11616423	CCC(=O)O[C@]1([C@H](C)C[C@H]2[C@]1(C)C[C@H](O)[C@]1([C@H]2CCC2=CC(=O)C=C[C@@]12C)F)C(=O)COC(=O)CC	C28H37FO7	504.59	36	0	0.71	8	8	1	131.04	106.97	3.63	4.07	4.24	2.7	4.43	3.81	-5	0.00499	9.9e-06	Moderately soluble	-6.02	0.000481	9.53e-07	Poorly soluble	-4.8	0.00803	1.59e-05	Moderately soluble	High	No	Yes	No	No	No	No	Yes	-6.49	1	3	0	0	0	0.55	0	1	3	5.97
ZINC11616426	C#C[C@]1(O)CC[C@@H]2[C@]1(C)CC[C@H]1[C@@H]2[C@@H](C)CC2=C1CCC(=O)C2	C21H28O2	312.45	23	0	0.76	0	2	1	93.43	37.3	3.06	2.36	3.96	3.95	4.28	3.52	-3.26	0.17	0.000545	Soluble	-2.78	0.514	0.00165	Soluble	-3.77	0.0525	0.000168	Soluble	High	Yes	Yes	No	No	No	No	No	-6.53	0	0	0	0	0	0.55	0	2	0	5.35
ZINC11616481	[O-]C(=O)CC[C@H]([C@H]1CC[C@H]2[C@@]1(C)C(=O)C[C@@H]1[C@@H]2C(=O)C[C@@H]2[C@]1(C)CCC(=O)C2)C	C24H33O5-	401.52	29	0	0.83	4	5	0	108.94	91.34	2.24	2.56	2.74	2.75	4.29	2.92	-3.68	0.0842	0.00021	Soluble	-4.13	0.0301	7.48e-05	Moderately soluble	-4.4	0.016	3.98e-05	Moderately soluble	High	No	No	No	No	No	No	No	-6.93	0	0	0	0	0	0.56	0	0	1	4.49
ZINC11616526	C[C@H]([NH2+][C@H]([C@H](c1ccc(cc1)O)O)C)COc1ccccc1	C18H24NO3+	302.39	22	12	0.33	7	3	3	88.7	66.3	2.65	2.82	1.52	-1.48	2.86	1.67	-3.43	0.112	0.000369	Soluble	-3.87	0.0408	0.000135	Soluble	-4.87	0.00408	1.35e-05	Moderately soluble	High	Yes	Yes	No	No	No	No	No	-6.14	0	0	0	0	0	0.55	0	0	0	3.07
ZINC11616655	O=C(c1ccccc1)Oc1ccc2c(c1)CC[C@@H]1[C@H]2CC[C@@]2([C@H]1CC[C@@H]2O)C	C25H28O3	376.49	28	12	0.48	3	3	1	110.4	46.53	3.76	4.47	5.12	4.93	4.75	4.61	-5.11	0.00293	7.77e-06	Moderately soluble	-5.17	0.00256	6.81e-06	Moderately soluble	-6.47	0.000127	3.38e-07	Poorly soluble	High	Yes	Yes	No	No	No	Yes	No	-5.42	1	0	0	0	0	0.55	0	1	2	4.25
ZINC11678081	[NH3+][C@@H]1C[C@@H](O[C@H]([C@H]1O)C)O[C@@H]1C[C@](O)(Cc2c1c(O)c1c(c2O)C(=O)c2c(C1=O)c(O)ccc2)C(=O)C	C26H28NO10+	514.5	37	12	0.42	3	10	6	128.29	198.46	2.49	1.5	-0.32	-5.23	1.22	-0.07	-4.02	0.0495	9.62e-05	Moderately soluble	-5.28	0.00273	5.3e-06	Moderately soluble	-3.35	0.228	0.000444	Soluble	Low	No	Yes	No	No	No	No	No	-8.37	3	1	1	1	2	0.17	1	1	1	5.71
ZINC11678088	[NH3+][C@@H]1C[C@@H](O[C@@H]([C@H]1O)C)O[C@@H]1C[C@](O)(Cc2c1c(O)c1c(c2O)C(=O)c2c(C1=O)c(O)ccc2)C(=O)C	C26H28NO10+	514.5	37	12	0.42	3	10	6	128.29	198.46	2.53	1.5	-0.32	-5.23	1.22	-0.06	-4.02	0.0495	9.62e-05	Moderately soluble	-5.28	0.00273	5.3e-06	Moderately soluble	-3.35	0.228	0.000444	Soluble	Low	No	Yes	No	No	No	No	No	-8.37	3	1	1	1	2	0.17	1	1	1	5.71
ZINC11678097	[NH3+][C@@H]1C[C@H](O[C@H]([C@H]1O)C)O[C@@H]1C[C@](O)(Cc2c1c(O)c1c(c2O)C(=O)c2c(C1=O)c(O)ccc2)C(=O)C	C26H28NO10+	514.5	37	12	0.42	3	10	6	128.29	198.46	2.49	1.5	-0.32	-5.23	1.22	-0.07	-4.02	0.0495	9.62e-05	Moderately soluble	-5.28	0.00273	5.3e-06	Moderately soluble	-3.35	0.228	0.000444	Soluble	Low	No	Yes	No	No	No	No	No	-8.37	3	1	1	1	2	0.17	1	1	1	5.71
ZINC11678102	[NH3+][C@@H]1C[C@H](O[C@@H]([C@H]1O)C)O[C@@H]1C[C@](O)(Cc2c1c(O)c1c(c2O)C(=O)c2c(C1=O)c(O)ccc2)C(=O)C	C26H28NO10+	514.5	37	12	0.42	3	10	6	128.29	198.46	2.22	1.5	-0.32	-5.23	1.22	-0.12	-4.02	0.0495	9.62e-05	Moderately soluble	-5.28	0.00273	5.3e-06	Moderately soluble	-3.35	0.228	0.000444	Soluble	Low	No	Yes	No	No	No	No	No	-8.37	3	1	1	1	2	0.17	1	1	1	5.71
ZINC11679768	CC[C@@H]1C[NH+]2CCc3c([C@@H]2C[C@@H]1C[C@@H]1[NH2+]CCc2c1cc(OC)c(c2)OC)cc(c(c3)OC)OC	C29H42N2O4++	482.65	35	12	0.59	7	4	2	148.98	57.97	4.91	4.74	1.09	-4.33	4.98	2.28	-5.61	0.00118	2.45e-06	Moderately soluble	-5.69	0.000992	2.05e-06	Moderately soluble	-7.7	9.63e-06	2e-08	Poorly soluble	High	Yes	Yes	No	No	No	No	No	-5.88	0	3	0	0	0	0.55	0	0	2	4.95
ZINC11996576	CC(=O)O[C@@H]1CC[C@]2(C(=CC[C@@H]3[C@H]2CC[C@]2([C@H]3CCC2=O)C)C1)C	C21H30O3	330.46	24	0	0.81	2	3	0	95.1	43.37	3.12	3.8	4.45	3.88	4.02	3.85	-4.15	0.0233	7.07e-05	Moderately soluble	-4.41	0.013	3.93e-05	Moderately soluble	-4.11	0.0254	7.69e-05	Moderately soluble	High	Yes	No	No	No	Yes	No	No	-5.62	0	0	0	0	0	0.55	0	1	1	4.82
ZINC12318391	OCC(=O)[C@]1(O)CC[C@@H]2[C@]1(C)CC(=O)[C@H]1[C@@H]2CCC2=CC(=O)CC[C@@]12C	C21H28O5	360.44	26	0	0.76	2	5	2	96.57	91.67	2.09	1.47	1.99	1.3	3.06	1.98	-2.87	0.488	0.00135	Soluble	-3	0.359	0.000996	Soluble	-3.33	0.169	0.000468	Soluble	High	No	Yes	No	No	No	No	No	-7.46	0	0	0	0	0	0.55	1	0	1	5.07
ZINC12358651	C/C(=C\C=C\C(=C\C(=O)[O-])\C)/C=C/C1=C(C)CCCC1(C)C	C20H27O2-	299.43	22	0	0.45	5	2	0	93.34	40.13	2.09	1.47	4.27	1.3	3.06	1.98	-2.87	0.488	0.00135	Soluble	-3	0.359	0.000996	Soluble	-3.33	0.169	0.000468	Soluble	High	No	Yes	No	No	No	No	No	-7.46	0	0	0	0	0	0.55	1	0	1	5.07
ZINC12358687	OC[C@H]([C@H]1O[C@H]2[C@@H]([C@@H]1O)O[C@@H](O2)C(Cl)(Cl)Cl)O	C8H11Cl3O6	309.53	17	0	1	3	6	3	57.51	88.38	1.66	1.02	-0.46	-0.75	0.15	0.32	-2.2	1.94	0.00626	Soluble	-2.47	1.06	0.00342	Soluble	0.06	355	1.15	Soluble	High	No	No	No	No	No	No	No	-7.46	0	1	0	0	0	0.55	0	1	0	4.58
ZINC12503147	[O-]C(=O)C1=C(CS[C@H]2N1C(=O)[C@H]2NC(=O)/C(=N/OCC(=O)[O-])/c1csc(n1)N)C=C	C16H13N5O7S2--	451.43	30	5	0.25	9	9	2	106.03	243.71	1.07	-0.68	-3.59	-1.07	0.11	-0.83	-1.74	8.22	0.0182	Very soluble	-3.96	0.0491	0.000109	Soluble	-0.75	81	0.179	Soluble	Low	No	No	No	No	No	No	No	-9.54	1	1	1	1	1	0.11	0	2	2	4.73
ZINC13298661	C#C[C@]1(O)CC[C@H]2[C@]1(C)CC[C@H]1[C@@H]2CCC2=CC(=O)CC[C@@]12C	C21H28O2	312.45	23	0	0.76	0	2	1	93.17	37.3	3.08	3.11	3.96	3.95	4.28	3.68	-3.74	0.0573	0.000183	Soluble	-3.56	0.0857	0.000274	Soluble	-3.77	0.0525	0.000168	Soluble	High	Yes	No	No	No	Yes	No	No	-6	0	0	0	0	0	0.55	0	1	0	5.12
ZINC13298712	CCC[C@@H]([C@]1(CC)C(=O)NC(=NC1=O)S)C	C11H18N2O2S	242.34	16	0	0.73	4	3	1	74.67	97.33	2.08	2.83	1	1.36	2.94	2.04	-2.86	0.333	0.00138	Soluble	-4.53	0.00712	2.94e-05	Moderately soluble	-3.38	0.101	0.000415	Soluble	High	No	No	No	Yes	No	No	No	-5.77	0	0	0	0	0	0.55	0	2	1	4.01
ZINC13466974	O=C1CC[C@@H]2C(=C1)CC[C@@H]1[C@H]2CC[C@@]2([C@H]1CC[C@@H]2O)C	C18H26O2	274.4	20	0	0.83	0	2	1	80.81	37.3	2.84	2.62	3.49	3.36	3.1	3.08	-3.19	0.176	0.000643	Soluble	-3.05	0.243	0.000885	Soluble	-2.88	0.36	0.00131	Soluble	High	Yes	No	No	No	No	No	No	-6.11	0	0	0	0	0	0.55	0	0	0	4.51
ZINC14649463	OC[C@@H]1O[C@@H](C[C@@H]1O)n1cnc2c1N=CNC[C@@H]2O	C11H16N4O4	268.27	19	5	0.64	2	6	4	72.08	112.13	1.11	-2.68	-2.59	-1.65	-1.22	-1.41	0.12	356	1.33	Highly soluble	0.88	2010	7.5	Highly soluble	0.28	517	1.93	Soluble	Low	No	No	No	No	No	No	No	-9.84	0	1	0	0	1	0.55	0	0	0	4.77
ZINC15111010	CCCCC[C@@H](/C=C/[C@H]1[C@@H](O)CC(=O)[C@@H]1C/C=C\CCCC(=O)[O-])O	C20H31O5-	351.46	25	0	0.7	12	5	2	97.55	97.66	2.96	2.82	1.92	1.89	3.92	2.7	-3	0.349	0.000992	Soluble	-4.53	0.0104	2.96e-05	Moderately soluble	-2.5	1.11	0.00315	Soluble	High	No	Yes	No	No	No	No	No	-6.44	0	0	1	0	0	0.56	0	1	2	4.86
ZINC15848261	CCCC[C@@](C/C=C/[C@H]1[C@@H](O)CC(=O)[C@@H]1CCCCCCC(=O)OC)(O)C	C22H38O5	382.53	27	0	0.82	14	5	2	109.13	83.83	3.83	3.66	3.95	2.42	4.94	3.76	-3.59	0.0975	0.000255	Soluble	-5.11	0.00297	7.77e-06	Moderately soluble	-4.29	0.0197	5.14e-05	Moderately soluble	High	No	Yes	No	No	No	Yes	No	-6.03	0	0	1	0	0	0.55	0	1	3	5.02
ZINC15848271	Clc1ccc(cc1)C/C(=C\C[NH+]1CCCC1)/c1ccccc1	C20H23ClN+	312.86	22	12	0.3	5	0	1	100.53	4.44	3.7	5.7	3.26	1.12	5.51	3.86	-5.44	0.00112	3.59e-06	Moderately soluble	-5.56	0.000863	2.76e-06	Moderately soluble	-6.86	4.34e-05	1.39e-07	Poorly soluble	High	Yes	No	Yes	Yes	No	No	No	-4.16	0	0	0	0	2	0.55	0	0	1	2.86
ZINC15880092	C[NH2+]CCc1ccccn1	C8H13N2+	137.2	10	6	0.38	3	1	1	42.88	29.5	1.89	0.68	-0.18	-3.13	1.66	0.18	-1.37	5.92	0.0431	Very soluble	-0.88	18.2	0.133	Very soluble	-3.24	0.0786	0.000573	Soluble	High	No	No	No	No	No	No	No	-6.65	0	1	0	0	1	0.55	0	0	1	1.35
ZINC49783788	CCCCC(=O)OCC(=O)[C@@]1(O)C[C@H](O[C@H]2C[C@H](NC(=O)C(F)(F)F)[C@@H]([C@@H](O2)C)O)c2c(C1)c(O)c1c(c2O)C(=O)c2c(C1=O)cccc2OC	C34H36F3NO13	723.64	51	12	0.5	13	16	5	166.92	215.22	4.16	3.6	3.4	-0.92	4	2.85	-5.91	0.000889	1.23e-06	Moderately soluble	-7.81	1.13e-05	1.56e-08	Poorly soluble	-6.33	0.000342	4.73e-07	Poorly soluble	Low	No	Yes	No	No	No	No	No	-8.16	2	3	2	1	3	0.17	1	1	3	6.48
ZINC3932831	O=C1C=C[C@]2([C@H](N1)CC[C@@H]1[C@@H]2CC[C@]2([C@H]1CC[C@@H]2C(=O)Nc1cc(ccc1C(F)(F)F)C(F)(F)F)C)C	C27H30F6N2O2	528.53	37	6	0.63	5	8	2	129.94	58.2	3.85	5.37	8.31	5.42	5.59	5.71	-6.29	0.000271	5.13e-07	Poorly soluble	-6.35	0.000238	4.51e-07	Poorly soluble	-7.47	1.81e-05	3.42e-08	Poorly soluble	Low	No	Yes	No	No	No	No	Yes	-5.71	2	2	0	1	1	0.17	0	0	2	5.36
ZINC538337	Clc1ccc2c(c1)c(cn2c1ccc(cc1)F)C1CCN(CC1)CCN1CCNC1=O	C24H26ClFN4O	440.94	31	15	0.38	5	3	1	133.17	40.51	3.92	4.07	3.91	4.14	3.96	4	-5.17	0.00301	6.82e-06	Moderately soluble	-4.63	0.0104	2.37e-05	Moderately soluble	-7.17	3.02e-05	6.84e-08	Poorly soluble	High	Yes	Yes	No	Yes	Yes	Yes	No	-6.1	0	1	0	0	0	0.55	0	0	2	3.1
ZINC19360739	Fc1ccc(cc1)C(c1ccc(cc1)F)N1CCN(CC1)C/C=C/c1ccccc1	C26H26F2N2	404.49	30	18	0.23	6	4	0	125.77	6.48	4.54	5.78	5.03	5.18	5.97	5.3	-6.04	0.000371	9.18e-07	Poorly soluble	-5.69	0.000835	2.06e-06	Moderately soluble	-8.23	2.37e-06	5.86e-09	Poorly soluble	High	Yes	Yes	No	No	No	Yes	No	-4.66	1	0	0	0	1	0.55	0	0	2	3.11

## Sheet: 3b
Additional file 3b: Binding affinity of AKT1 protein to candidate drugs.
Candidate drugs from FDA	Target (AKT1)	Binding Affinity (kcal/mol)
ZINC3993855	AKT1_3ocb	-11.1
ZINC1481956	AKT1_3ocb	-10.8
ZINC60325170	AKT1_3ocb	-10.6
ZINC968276	AKT1_3ocb	-10.5
ZINC538337	AKT1_3ocb	-10.3
ZINC3978005	AKT1_3ocb	-10.1
ZINC3932831	AKT1_3ocb	-10.1
ZINC3915154	AKT1_3ocb	-10.1
ZINC4099009	AKT1_3ocb	-10.1
ZINC3920266	AKT1_3ocb	-9.9
ZINC3914596	AKT1_3ocb	-9.9
ZINC49783788	AKT1_3ocb	-9.9
ZINC6716957	AKT1_3ocb	-9.8
ZINC4097343	AKT1_3ocb	-9.7
ZINC3978083	AKT1_3ocb	-9.7
ZINC537877	AKT1_3ocb	-9.7
ZINC3775575	AKT1_3ocb	-9.7
ZINC1530788	AKT1_3ocb	-9.6
ZINC2033590	AKT1_3ocb	-9.6
ZINC3830922	AKT1_3ocb	-9.6
ZINC3830766	AKT1_3ocb	-9.6
ZINC3830383	AKT1_3ocb	-9.6
ZINC5844788	AKT1_3ocb	-9.6
ZINC5844792	AKT1_3ocb	-9.6
ZINC538550	AKT1_3ocb	-9.6
ZINC11678081	AKT1_3ocb	-9.6
ZINC601274	AKT1_3ocb	-9.6
ZINC3817234	AKT1_3ocb	-9.5
ZINC11592929	AKT1_3ocb	-9.5
ZINC3831150	AKT1_3ocb	-9.5
ZINC1482077	AKT1_3ocb	-9.5
ZINC22448696	AKT1_3ocb	-9.5
ZINC3782818	AKT1_3ocb	-9.5
ZINC3831493	AKT1_3ocb	-9.4
ZINC3830385	AKT1_3ocb	-9.4
ZINC3830426	AKT1_3ocb	-9.4
ZINC1757652	AKT1_3ocb	-9.3
ZINC968277	AKT1_3ocb	-9.3
ZINC11592733	AKT1_3ocb	-9.3
ZINC11592839	AKT1_3ocb	-9.3
ZINC3831193	AKT1_3ocb	-9.3
ZINC3830747	AKT1_3ocb	-9.3
ZINC8034263	AKT1_3ocb	-9.2
ZINC2033589	AKT1_3ocb	-9.2
ZINC53683151	AKT1_3ocb	-9.2
ZINC1529323	AKT1_3ocb	-9.2
ZINC11616655	AKT1_3ocb	-9.2
ZINC3831448	AKT1_3ocb	-9.2
ZINC3830768	AKT1_3ocb	-9.2
ZINC3830746	AKT1_3ocb	-9.2
ZINC3830632	AKT1_3ocb	-9.2
ZINC11592928	AKT1_3ocb	-9.2
ZINC3830627	AKT1_3ocb	-9.2
ZINC11678102	AKT1_3ocb	-9.2
ZINC3831506	AKT1_3ocb	-9.2
ZINC19360739	AKT1_3ocb	-9.2
ZINC18324776	AKT1_3ocb	-9.2
ZINC896717	AKT1_3ocb	-9.1
ZINC4474460	AKT1_3ocb	-9.1
ZINC3830431	AKT1_3ocb	-9.1
ZINC3830925	AKT1_3ocb	-9.1
ZINC3830923	AKT1_3ocb	-9.1
ZINC3831495	AKT1_3ocb	-9.1
ZINC19632618	AKT1_3ocb	-9.1
ZINC537804	AKT1_3ocb	-9
ZINC1489478	AKT1_3ocb	-9
ZINC537795	AKT1_3ocb	-9
ZINC538483	AKT1_3ocb	-9
ZINC3830856	AKT1_3ocb	-9
ZINC11616426	AKT1_3ocb	-9
ZINC3831460	AKT1_3ocb	-9
ZINC19361042	AKT1_3ocb	-9
ZINC19796168	AKT1_3ocb	-9
ZINC3938746	AKT1_3ocb	-8.9
ZINC5275870	AKT1_3ocb	-8.9
ZINC1530586	AKT1_3ocb	-8.9
ZINC11592618	AKT1_3ocb	-8.9
ZINC11592622	AKT1_3ocb	-8.9
ZINC11592805	AKT1_3ocb	-8.9
ZINC19796080	AKT1_3ocb	-8.9
ZINC3830394	AKT1_3ocb	-8.9
ZINC3830770	AKT1_3ocb	-8.9
ZINC11616269	AKT1_3ocb	-8.9
ZINC3831217	AKT1_3ocb	-8.9
ZINC3831223	AKT1_3ocb	-8.9
ZINC11678097	AKT1_3ocb	-8.9
ZINC897408	AKT1_3ocb	-8.9
ZINC11679768	AKT1_3ocb	-8.9
ZINC19594557	AKT1_3ocb	-8.9
ZINC3831345	AKT1_3ocb	-8.8
ZINC3830782	AKT1_3ocb	-8.8
ZINC3830716	AKT1_3ocb	-8.8
ZINC537805	AKT1_3ocb	-8.8
ZINC3830873	AKT1_3ocb	-8.8
ZINC3824921	AKT1_3ocb	-8.8
ZINC601317	AKT1_3ocb	-8.8
ZINC3882036	AKT1_3ocb	-8.8
ZINC3831219	AKT1_3ocb	-8.8
ZINC538065	AKT1_3ocb	-8.8
ZINC4097305	AKT1_3ocb	-8.7
ZINC1041177	AKT1_3ocb	-8.7
ZINC4097404	AKT1_3ocb	-8.7
ZINC518397	AKT1_3ocb	-8.7
ZINC3830466	AKT1_3ocb	-8.7
ZINC1552174	AKT1_3ocb	-8.7
ZINC8035451	AKT1_3ocb	-8.7
ZINC1542929	AKT1_3ocb	-8.7
ZINC3831370	AKT1_3ocb	-8.7
ZINC3831258	AKT1_3ocb	-8.7
ZINC11592878	AKT1_3ocb	-8.7
ZINC537822	AKT1_3ocb	-8.7
ZINC537928	AKT1_3ocb	-8.7
ZINC537931	AKT1_3ocb	-8.7
ZINC3830400	AKT1_3ocb	-8.7
ZINC3830976	AKT1_3ocb	-8.7
ZINC3927200	AKT1_3ocb	-8.7
ZINC9212428	AKT1_3ocb	-8.7
ZINC4097304	AKT1_3ocb	-8.7
ZINC3873936	AKT1_3ocb	-8.6
ZINC3823475	AKT1_3ocb	-8.6
ZINC3830763	AKT1_3ocb	-8.6
ZINC897085	AKT1_3ocb	-8.6
ZINC3872566	AKT1_3ocb	-8.6
ZINC2016037	AKT1_3ocb	-8.6
ZINC1530585	AKT1_3ocb	-8.6
ZINC4215367	AKT1_3ocb	-8.6
ZINC608382	AKT1_3ocb	-8.6
ZINC3831368	AKT1_3ocb	-8.6
ZINC3831068	AKT1_3ocb	-8.6
ZINC3977777	AKT1_3ocb	-8.6
ZINC3830639	AKT1_3ocb	-8.6
ZINC3830558	AKT1_3ocb	-8.6
ZINC3830433	AKT1_3ocb	-8.6
ZINC3830617	AKT1_3ocb	-8.6
ZINC3830396	AKT1_3ocb	-8.6
ZINC538564	AKT1_3ocb	-8.6
ZINC6920406	AKT1_3ocb	-8.6
ZINC3831044	AKT1_3ocb	-8.6
ZINC3831159	AKT1_3ocb	-8.6
ZINC3802417	AKT1_3ocb	-8.6
ZINC1624	AKT1_3ocb	-8.6
ZINC4164459	AKT1_3ocb	-8.6
ZINC3876023	AKT1_3ocb	-8.6
ZINC1370	AKT1_3ocb	-8.6
ZINC1850376	AKT1_3ocb	-8.5
ZINC19796155	AKT1_3ocb	-8.5
ZINC3875334	AKT1_3ocb	-8.5
ZINC606383	AKT1_3ocb	-8.5
ZINC3830788	AKT1_3ocb	-8.5
ZINC3830647	AKT1_3ocb	-8.5
ZINC155525	AKT1_3ocb	-8.5
ZINC11592903	AKT1_3ocb	-8.5
ZINC3830403	AKT1_3ocb	-8.5
ZINC3830886	AKT1_3ocb	-8.5
ZINC3814419	AKT1_3ocb	-8.5
ZINC7997897	AKT1_3ocb	-8.5
ZINC3831092	AKT1_3ocb	-8.5
ZINC3831185	AKT1_3ocb	-8.5
ZINC3814395	AKT1_3ocb	-8.5
ZINC3812897	AKT1_3ocb	-8.5
ZINC3097990	AKT1_3ocb	-8.5
ZINC3831515	AKT1_3ocb	-8.5
ZINC3831581	AKT1_3ocb	-8.5
ZINC431	AKT1_3ocb	-8.5
ZINC2568036	AKT1_3ocb	-8.5
ZINC13298661	AKT1_3ocb	-8.4
ZINC3914809	AKT1_3ocb	-8.4
ZINC1530977	AKT1_3ocb	-8.4
ZINC1530612	AKT1_3ocb	-8.4
ZINC1481815	AKT1_3ocb	-8.4
ZINC3831552	AKT1_3ocb	-8.4
ZINC3831402	AKT1_3ocb	-8.4
ZINC3831347	AKT1_3ocb	-8.4
ZINC3831243	AKT1_3ocb	-8.4
ZINC3831123	AKT1_3ocb	-8.4
ZINC2008250	AKT1_3ocb	-8.4
ZINC3830838	AKT1_3ocb	-8.4
ZINC3830824	AKT1_3ocb	-8.4
ZINC3830786	AKT1_3ocb	-8.4
ZINC3830656	AKT1_3ocb	-8.4
ZINC11592737	AKT1_3ocb	-8.4
ZINC537891	AKT1_3ocb	-8.4
ZINC3830401	AKT1_3ocb	-8.4
ZINC3830636	AKT1_3ocb	-8.4
ZINC11616276	AKT1_3ocb	-8.4
ZINC11616481	AKT1_3ocb	-8.4
ZINC3831125	AKT1_3ocb	-8.4
ZINC1530562	AKT1_3ocb	-8.4
ZINC3831583	AKT1_3ocb	-8.4
ZINC13520815	AKT1_3ocb	-8.4
ZINC897251	AKT1_3ocb	-8.4
ZINC347	AKT1_3ocb	-8.4
ZINC1530571	AKT1_3ocb	-8.4
ZINC896773	AKT1_3ocb	-8.4
ZINC527386	AKT1_3ocb	-8.3
ZINC3874185	AKT1_3ocb	-8.3
ZINC5276790	AKT1_3ocb	-8.3
ZINC1532344	AKT1_3ocb	-8.3
ZINC403566	AKT1_3ocb	-8.3
ZINC3977884	AKT1_3ocb	-8.3
ZINC4212854	AKT1_3ocb	-8.3
ZINC3831346	AKT1_3ocb	-8.3
ZINC3831330	AKT1_3ocb	-8.3
ZINC2510358	AKT1_3ocb	-8.3
ZINC3830413	AKT1_3ocb	-8.3
ZINC11592648	AKT1_3ocb	-8.3
ZINC3830641	AKT1_3ocb	-8.3
ZINC601301	AKT1_3ocb	-8.3
ZINC3830595	AKT1_3ocb	-8.3
ZINC3830405	AKT1_3ocb	-8.3
ZINC19796087	AKT1_3ocb	-8.3
ZINC538273	AKT1_3ocb	-8.3
ZINC3830637	AKT1_3ocb	-8.3
ZINC538438	AKT1_3ocb	-8.3
ZINC3830780	AKT1_3ocb	-8.3
ZINC3830839	AKT1_3ocb	-8.3
ZINC11616274	AKT1_3ocb	-8.3
ZINC3831374	AKT1_3ocb	-8.3
ZINC3798537	AKT1_3ocb	-8.3
ZINC3831584	AKT1_3ocb	-8.3
ZINC3830864	AKT1_3ocb	-8.3
ZINC8551464	AKT1_3ocb	-8.3
ZINC897253	AKT1_3ocb	-8.3
ZINC9073	AKT1_3ocb	-8.3
ZINC740	AKT1_3ocb	-8.3
ZINC19418959	AKT1_3ocb	-8.2
ZINC16052277	AKT1_3ocb	-8.2
ZINC1850374	AKT1_3ocb	-8.2
ZINC5920288	AKT1_3ocb	-8.2
ZINC1530603	AKT1_3ocb	-8.2
ZINC1529463	AKT1_3ocb	-8.2
ZINC2032615	AKT1_3ocb	-8.2
ZINC2036738	AKT1_3ocb	-8.2
ZINC601272	AKT1_3ocb	-8.2
ZINC1542901	AKT1_3ocb	-8.2
ZINC3875980	AKT1_3ocb	-8.2
ZINC2021839	AKT1_3ocb	-8.2
ZINC3831329	AKT1_3ocb	-8.2
ZINC3831317	AKT1_3ocb	-8.2
ZINC3830796	AKT1_3ocb	-8.2
ZINC3830794	AKT1_3ocb	-8.2
ZINC11592603	AKT1_3ocb	-8.2
ZINC11592624	AKT1_3ocb	-8.2
ZINC11592731	AKT1_3ocb	-8.2
ZINC2598638	AKT1_3ocb	-8.2
ZINC11592790	AKT1_3ocb	-8.2
ZINC11592879	AKT1_3ocb	-8.2
ZINC11592902	AKT1_3ocb	-8.2
ZINC1999487	AKT1_3ocb	-8.2
ZINC2032320	AKT1_3ocb	-8.2
ZINC3926298	AKT1_3ocb	-8.2
ZINC3830442	AKT1_3ocb	-8.2
ZINC537964	AKT1_3ocb	-8.2
ZINC3830629	AKT1_3ocb	-8.2
ZINC3830399	AKT1_3ocb	-8.2
ZINC3830673	AKT1_3ocb	-8.2
ZINC3830884	AKT1_3ocb	-8.2
ZINC3831090	AKT1_3ocb	-8.2
ZINC3831218	AKT1_3ocb	-8.2
ZINC3831381	AKT1_3ocb	-8.2
ZINC3831512	AKT1_3ocb	-8.2
ZINC1732	AKT1_3ocb	-8.2
ZINC449	AKT1_3ocb	-8.2
ZINC6157	AKT1_3ocb	-8.2
ZINC4448	AKT1_3ocb	-8.2
ZINC3875560	AKT1_3ocb	-8.2
ZINC3830847	AKT1_3ocb	-8.2
ZINC13763987	AKT1_3ocb	-8.1
ZINC968263	AKT1_3ocb	-8.1
ZINC1530747	AKT1_3ocb	-8.1
ZINC13540519	AKT1_3ocb	-8.1
ZINC601316	AKT1_3ocb	-8.1
ZINC4097286	AKT1_3ocb	-8.1
ZINC3875998	AKT1_3ocb	-8.1
ZINC3831462	AKT1_3ocb	-8.1
ZINC2008866	AKT1_3ocb	-8.1
ZINC3831096	AKT1_3ocb	-8.1
ZINC3830845	AKT1_3ocb	-8.1
ZINC4676376	AKT1_3ocb	-8.1
ZINC11592620	AKT1_3ocb	-8.1
ZINC3830645	AKT1_3ocb	-8.1
ZINC3830199	AKT1_3ocb	-8.1
ZINC3830489	AKT1_3ocb	-8.1
ZINC3830491	AKT1_3ocb	-8.1
ZINC3830665	AKT1_3ocb	-8.1
ZINC3830743	AKT1_3ocb	-8.1
ZINC3830745	AKT1_3ocb	-8.1
ZINC3830974	AKT1_3ocb	-8.1
ZINC3830224	AKT1_3ocb	-8.1
ZINC3831012	AKT1_3ocb	-8.1
ZINC3831045	AKT1_3ocb	-8.1
ZINC3831089	AKT1_3ocb	-8.1
ZINC3830414	AKT1_3ocb	-8.1
ZINC3831164	AKT1_3ocb	-8.1
ZINC1542930	AKT1_3ocb	-8.1
ZINC3831428	AKT1_3ocb	-8.1
ZINC2212	AKT1_3ocb	-8.1
ZINC3831601	AKT1_3ocb	-8.1
ZINC2570830	AKT1_3ocb	-8.1
ZINC654	AKT1_3ocb	-8.1
ZINC11726211	AKT1_3ocb	-8.1
ZINC13129998	AKT1_3ocb	-8.1
ZINC2019839	AKT1_3ocb	-8.1
ZINC4097310	AKT1_3ocb	-8
ZINC11565587	AKT1_3ocb	-8
ZINC3943279	AKT1_3ocb	-8
ZINC1530579	AKT1_3ocb	-8
ZINC3871967	AKT1_3ocb	-8
ZINC33517	AKT1_3ocb	-8
ZINC601283	AKT1_3ocb	-8
ZINC19203912	AKT1_3ocb	-8
ZINC598034	AKT1_3ocb	-8
ZINC1542393	AKT1_3ocb	-8
ZINC3831616	AKT1_3ocb	-8
ZINC3831615	AKT1_3ocb	-8
ZINC3831307	AKT1_3ocb	-8
ZINC3831306	AKT1_3ocb	-8
ZINC3830840	AKT1_3ocb	-8
ZINC121541	AKT1_3ocb	-8
ZINC3977767	AKT1_3ocb	-8
ZINC1530877	AKT1_3ocb	-8
ZINC11592791	AKT1_3ocb	-8
ZINC3830606	AKT1_3ocb	-8
ZINC3830196	AKT1_3ocb	-8
ZINC3830916	AKT1_3ocb	-8
ZINC28467879	AKT1_3ocb	-8
ZINC3830823	AKT1_3ocb	-8
ZINC3830335	AKT1_3ocb	-8
ZINC3830334	AKT1_3ocb	-8
ZINC3830321	AKT1_3ocb	-8
ZINC3826253	AKT1_3ocb	-8
ZINC11616400	AKT1_3ocb	-8
ZINC3831247	AKT1_3ocb	-8
ZINC3831599	AKT1_3ocb	-8
ZINC3786192	AKT1_3ocb	-8
ZINC3782599	AKT1_3ocb	-8
ZINC896543	AKT1_3ocb	-8
ZINC5497159	AKT1_3ocb	-8
ZINC1148	AKT1_3ocb	-8
ZINC4319	AKT1_3ocb	-8
ZINC3875484	AKT1_3ocb	-8
ZINC3995809	AKT1_3ocb	-8
ZINC1707875	AKT1_3ocb	-8
ZINC3871615	AKT1_3ocb	-7.9
ZINC1530866	AKT1_3ocb	-7.9
ZINC1530761	AKT1_3ocb	-7.9
ZINC1530695	AKT1_3ocb	-7.9
ZINC3833821	AKT1_3ocb	-7.9
ZINC13466974	AKT1_3ocb	-7.9
ZINC607971	AKT1_3ocb	-7.9
ZINC12318391	AKT1_3ocb	-7.9
ZINC3831424	AKT1_3ocb	-7.9
ZINC3831422	AKT1_3ocb	-7.9
ZINC3831354	AKT1_3ocb	-7.9
ZINC3831171	AKT1_3ocb	-7.9
ZINC3831004	AKT1_3ocb	-7.9
ZINC537811	AKT1_3ocb	-7.9
ZINC3830843	AKT1_3ocb	-7.9
ZINC1843099	AKT1_3ocb	-7.9
ZINC11592581	AKT1_3ocb	-7.9
ZINC3830593	AKT1_3ocb	-7.9
ZINC3830514	AKT1_3ocb	-7.9
ZINC1530582	AKT1_3ocb	-7.9
ZINC3830306	AKT1_3ocb	-7.9
ZINC1530922	AKT1_3ocb	-7.9
ZINC3830538	AKT1_3ocb	-7.9
ZINC3830640	AKT1_3ocb	-7.9
ZINC4693575	AKT1_3ocb	-7.9
ZINC3830774	AKT1_3ocb	-7.9
ZINC3830776	AKT1_3ocb	-7.9
ZINC4097308	AKT1_3ocb	-7.9
ZINC11616399	AKT1_3ocb	-7.9
ZINC3831129	AKT1_3ocb	-7.9
ZINC3831198	AKT1_3ocb	-7.9
ZINC3831221	AKT1_3ocb	-7.9
ZINC3831411	AKT1_3ocb	-7.9
ZINC3794601	AKT1_3ocb	-7.9
ZINC1271086	AKT1_3ocb	-7.9
ZINC896740	AKT1_3ocb	-7.9
ZINC15848271	AKT1_3ocb	-7.9
ZINC2522669	AKT1_3ocb	-7.9
ZINC33518	AKT1_3ocb	-7.9
ZINC75126	AKT1_3ocb	-7.9
ZINC643055	AKT1_3ocb	-7.9
ZINC538450	AKT1_3ocb	-7.8
ZINC3871960	AKT1_3ocb	-7.8
ZINC1271441	AKT1_3ocb	-7.8
ZINC57512	AKT1_3ocb	-7.8
ZINC3831450	AKT1_3ocb	-7.8
ZINC3831296	AKT1_3ocb	-7.8
ZINC3830986	AKT1_3ocb	-7.8
ZINC3830859	AKT1_3ocb	-7.8
ZINC3830784	AKT1_3ocb	-7.8
ZINC8496	AKT1_3ocb	-7.8
ZINC523925	AKT1_3ocb	-7.8
ZINC5823	AKT1_3ocb	-7.8
ZINC1769096	AKT1_3ocb	-7.8
ZINC4062829	AKT1_3ocb	-7.8
ZINC11592591	AKT1_3ocb	-7.8
ZINC3830515	AKT1_3ocb	-7.8
ZINC3830473	AKT1_3ocb	-7.8
ZINC12503147	AKT1_3ocb	-7.8
ZINC3830778	AKT1_3ocb	-7.8
ZINC3830871	AKT1_3ocb	-7.8
ZINC3830261	AKT1_3ocb	-7.8
ZINC3831427	AKT1_3ocb	-7.8
ZINC2070	AKT1_3ocb	-7.8
ZINC4693574	AKT1_3ocb	-7.8
ZINC8551106	AKT1_3ocb	-7.8
ZINC1175	AKT1_3ocb	-7.8
ZINC3871703	AKT1_3ocb	-7.8
ZINC968338	AKT1_3ocb	-7.8
ZINC3812841	AKT1_3ocb	-7.8
ZINC3871614	AKT1_3ocb	-7.8
ZINC1530694	AKT1_3ocb	-7.7
ZINC57255	AKT1_3ocb	-7.7
ZINC3607120	AKT1_3ocb	-7.7
ZINC11592604	AKT1_3ocb	-7.7
ZINC1530697	AKT1_3ocb	-7.7
ZINC3954487	AKT1_3ocb	-7.7
ZINC14879992	AKT1_3ocb	-7.7
ZINC1546066	AKT1_3ocb	-7.7
ZINC608191	AKT1_3ocb	-7.7
ZINC3831483	AKT1_3ocb	-7.7
ZINC3964325	AKT1_3ocb	-7.7
ZINC3830658	AKT1_3ocb	-7.7
ZINC11592835	AKT1_3ocb	-7.7
ZINC3830601	AKT1_3ocb	-7.7
ZINC3830600	AKT1_3ocb	-7.7
ZINC3830579	AKT1_3ocb	-7.7
ZINC3830182	AKT1_3ocb	-7.7
ZINC3830219	AKT1_3ocb	-7.7
ZINC3830435	AKT1_3ocb	-7.7
ZINC3830790	AKT1_3ocb	-7.7
ZINC1707475	AKT1_3ocb	-7.7
ZINC538538	AKT1_3ocb	-7.7
ZINC3831059	AKT1_3ocb	-7.7
ZINC3831061	AKT1_3ocb	-7.7
ZINC1530625	AKT1_3ocb	-7.7
ZINC3813083	AKT1_3ocb	-7.7
ZINC3831248	AKT1_3ocb	-7.7
ZINC3831364	AKT1_3ocb	-7.7
ZINC4099200	AKT1_3ocb	-7.7
ZINC119988	AKT1_3ocb	-7.7
ZINC416	AKT1_3ocb	-7.7
ZINC11996576	AKT1_3ocb	-7.7
ZINC3876136	AKT1_3ocb	-7.7
ZINC4785	AKT1_3ocb	-7.7
ZINC13537284	AKT1_3ocb	-7.7
ZINC145	AKT1_3ocb	-7.6
ZINC5275963	AKT1_3ocb	-7.6
ZINC1530947	AKT1_3ocb	-7.6
ZINC1530935	AKT1_3ocb	-7.6
ZINC1851415	AKT1_3ocb	-7.6
ZINC3978030	AKT1_3ocb	-7.6
ZINC403010	AKT1_3ocb	-7.6
ZINC3978006	AKT1_3ocb	-7.6
ZINC596881	AKT1_3ocb	-7.6
ZINC601310	AKT1_3ocb	-7.6
ZINC4676424	AKT1_3ocb	-7.6
ZINC3831445	AKT1_3ocb	-7.6
ZINC3831332	AKT1_3ocb	-7.6
ZINC3831297	AKT1_3ocb	-7.6
ZINC3831281	AKT1_3ocb	-7.6
ZINC8551107	AKT1_3ocb	-7.6
ZINC11592621	AKT1_3ocb	-7.6
ZINC3830620	AKT1_3ocb	-7.6
ZINC608172	AKT1_3ocb	-7.6
ZINC3830485	AKT1_3ocb	-7.6
ZINC3830391	AKT1_3ocb	-7.6
ZINC3830479	AKT1_3ocb	-7.6
ZINC3830408	AKT1_3ocb	-7.6
ZINC3830577	AKT1_3ocb	-7.6
ZINC32352	AKT1_3ocb	-7.6
ZINC163	AKT1_3ocb	-7.6
ZINC11616423	AKT1_3ocb	-7.6
ZINC3812869	AKT1_3ocb	-7.6
ZINC3831366	AKT1_3ocb	-7.6
ZINC119985	AKT1_3ocb	-7.6
ZINC856	AKT1_3ocb	-7.6
ZINC8667	AKT1_3ocb	-7.6
ZINC7455	AKT1_3ocb	-7.6
ZINC1726065	AKT1_3ocb	-7.6
ZINC3871612	AKT1_3ocb	-7.6
ZINC5151	AKT1_3ocb	-7.5
ZINC12358651	AKT1_3ocb	-7.5
ZINC968328	AKT1_3ocb	-7.5
ZINC3927870	AKT1_3ocb	-7.5
ZINC1530638	AKT1_3ocb	-7.5
ZINC1571045	AKT1_3ocb	-7.5
ZINC8575811	AKT1_3ocb	-7.5
ZINC608288	AKT1_3ocb	-7.5
ZINC3831404	AKT1_3ocb	-7.5
ZINC3831357	AKT1_3ocb	-7.5
ZINC3831355	AKT1_3ocb	-7.5
ZINC3831331	AKT1_3ocb	-7.5
ZINC57319	AKT1_3ocb	-7.5
ZINC3831235	AKT1_3ocb	-7.5
ZINC188746	AKT1_3ocb	-7.5
ZINC1999542	AKT1_3ocb	-7.5
ZINC11592588	AKT1_3ocb	-7.5
ZINC11592734	AKT1_3ocb	-7.5
ZINC3830185	AKT1_3ocb	-7.5
ZINC3830212	AKT1_3ocb	-7.5
ZINC3830511	AKT1_3ocb	-7.5
ZINC3830487	AKT1_3ocb	-7.5
ZINC402777	AKT1_3ocb	-7.5
ZINC3830445	AKT1_3ocb	-7.5
ZINC3830900	AKT1_3ocb	-7.5
ZINC3831093	AKT1_3ocb	-7.5
ZINC3831225	AKT1_3ocb	-7.5
ZINC3831271	AKT1_3ocb	-7.5
ZINC3831458	AKT1_3ocb	-7.5
ZINC2272	AKT1_3ocb	-7.5
ZINC2264	AKT1_3ocb	-7.5
ZINC119983	AKT1_3ocb	-7.5
ZINC1971	AKT1_3ocb	-7.5
ZINC1773	AKT1_3ocb	-7.5
ZINC1441	AKT1_3ocb	-7.5
ZINC3861806	AKT1_3ocb	-7.5
ZINC896472	AKT1_3ocb	-7.5
ZINC897256	AKT1_3ocb	-7.5
ZINC20252	AKT1_3ocb	-7.5
ZINC20251	AKT1_3ocb	-7.5
ZINC4760	AKT1_3ocb	-7.5
ZINC621892	AKT1_3ocb	-7.5
ZINC19632670	AKT1_3ocb	-7.5
ZINC35653009	AKT1_3ocb	-7.5
ZINC3794794	AKT1_3ocb	-7.5
ZINC22116612	AKT1_3ocb	-7.5
ZINC1567421	AKT1_3ocb	-7.5
ZINC968330	AKT1_3ocb	-7.5
ZINC19796018	AKT1_3ocb	-7.5
ZINC3871613	AKT1_3ocb	-7.4
ZINC5273673	AKT1_3ocb	-7.4
ZINC2011568	AKT1_3ocb	-7.4
ZINC1530594	AKT1_3ocb	-7.4
ZINC403529	AKT1_3ocb	-7.4
ZINC1536779	AKT1_3ocb	-7.4
ZINC56643	AKT1_3ocb	-7.4
ZINC896634	AKT1_3ocb	-7.4
ZINC19228902	AKT1_3ocb	-7.4
ZINC601312	AKT1_3ocb	-7.4
ZINC3830183	AKT1_3ocb	-7.4
ZINC3604143	AKT1_3ocb	-7.4
ZINC3830450	AKT1_3ocb	-7.4
ZINC3830417	AKT1_3ocb	-7.4
ZINC1639	AKT1_3ocb	-7.4
ZINC3813087	AKT1_3ocb	-7.4
ZINC9224016	AKT1_3ocb	-7.4
ZINC2062	AKT1_3ocb	-7.4
ZINC1587	AKT1_3ocb	-7.4
ZINC11012	AKT1_3ocb	-7.4
ZINC5765543	AKT1_3ocb	-7.4
ZINC12661824	AKT1_3ocb	-7.4
ZINC19632668	AKT1_3ocb	-7.4
ZINC3831565	AKT1_3ocb	-7.4
ZINC608205	AKT1_3ocb	-7.4
ZINC19364230	AKT1_3ocb	-7.3
ZINC1530706	AKT1_3ocb	-7.3
ZINC968335	AKT1_3ocb	-7.3
ZINC968336	AKT1_3ocb	-7.3
ZINC4474405	AKT1_3ocb	-7.3
ZINC1530948	AKT1_3ocb	-7.3
ZINC1530688	AKT1_3ocb	-7.3
ZINC19364224	AKT1_3ocb	-7.3
ZINC896755	AKT1_3ocb	-7.3
ZINC11616526	AKT1_3ocb	-7.3
ZINC1699600	AKT1_3ocb	-7.3
ZINC3977994	AKT1_3ocb	-7.3
ZINC608106	AKT1_3ocb	-7.3
ZINC601259	AKT1_3ocb	-7.3
ZINC2037707	AKT1_3ocb	-7.3
ZINC3831539	AKT1_3ocb	-7.3
ZINC3831358	AKT1_3ocb	-7.3
ZINC3831356	AKT1_3ocb	-7.3
ZINC57313	AKT1_3ocb	-7.3
ZINC3604264	AKT1_3ocb	-7.3
ZINC57173	AKT1_3ocb	-7.3
ZINC3831166	AKT1_3ocb	-7.3
ZINC3831070	AKT1_3ocb	-7.3
ZINC3830820	AKT1_3ocb	-7.3
ZINC896583	AKT1_3ocb	-7.3
ZINC3830690	AKT1_3ocb	-7.3
ZINC2599970	AKT1_3ocb	-7.3
ZINC601254	AKT1_3ocb	-7.3
ZINC3830198	AKT1_3ocb	-7.3
ZINC3830215	AKT1_3ocb	-7.3
ZINC3830217	AKT1_3ocb	-7.3
ZINC537752	AKT1_3ocb	-7.3
ZINC11330186	AKT1_3ocb	-7.3
ZINC3830439	AKT1_3ocb	-7.3
ZINC3830519	AKT1_3ocb	-7.3
ZINC596	AKT1_3ocb	-7.3
ZINC3830337	AKT1_3ocb	-7.3
ZINC3830858	AKT1_3ocb	-7.3
ZINC3830899	AKT1_3ocb	-7.3
ZINC3830972	AKT1_3ocb	-7.3
ZINC3830246	AKT1_3ocb	-7.3
ZINC896449	AKT1_3ocb	-7.3
ZINC1530707	AKT1_3ocb	-7.3
ZINC3812876	AKT1_3ocb	-7.3
ZINC3201958	AKT1_3ocb	-7.3
ZINC2018339	AKT1_3ocb	-7.3
ZINC896731	AKT1_3ocb	-7.3
ZINC8552292	AKT1_3ocb	-7.3
ZINC119717	AKT1_3ocb	-7.3
ZINC896836	AKT1_3ocb	-7.3
ZINC897258	AKT1_3ocb	-7.3
ZINC20249	AKT1_3ocb	-7.3
ZINC363	AKT1_3ocb	-7.3
ZINC301	AKT1_3ocb	-7.3
ZINC155894	AKT1_3ocb	-7.3
ZINC2114	AKT1_3ocb	-7.3
ZINC4028	AKT1_3ocb	-7.3
ZINC3775644	AKT1_3ocb	-7.3
ZINC57501	AKT1_3ocb	-7.3
ZINC19364222	AKT1_3ocb	-7.3
ZINC3830609	AKT1_3ocb	-7.3
ZINC3875393	AKT1_3ocb	-7.3
ZINC478	AKT1_3ocb	-7.2
ZINC633	AKT1_3ocb	-7.2
ZINC5273674	AKT1_3ocb	-7.2
ZINC896747	AKT1_3ocb	-7.2
ZINC968360	AKT1_3ocb	-7.2
ZINC9212278	AKT1_3ocb	-7.2
ZINC1530764	AKT1_3ocb	-7.2
ZINC1846741	AKT1_3ocb	-7.2
ZINC15111010	AKT1_3ocb	-7.2
ZINC3831563	AKT1_3ocb	-7.2
ZINC3830969	AKT1_3ocb	-7.2
ZINC3830749	AKT1_3ocb	-7.2
ZINC54567	AKT1_3ocb	-7.2
ZINC57236	AKT1_3ocb	-7.2
ZINC3830280	AKT1_3ocb	-7.2
ZINC537809	AKT1_3ocb	-7.2
ZINC1999543	AKT1_3ocb	-7.2
ZINC2018341	AKT1_3ocb	-7.2
ZINC3830449	AKT1_3ocb	-7.2
ZINC1207	AKT1_3ocb	-7.2
ZINC3830339	AKT1_3ocb	-7.2
ZINC3830849	AKT1_3ocb	-7.2
ZINC3830851	AKT1_3ocb	-7.2
ZINC3830283	AKT1_3ocb	-7.2
ZINC3830993	AKT1_3ocb	-7.2
ZINC3807804	AKT1_3ocb	-7.2
ZINC3201907	AKT1_3ocb	-7.2
ZINC1925	AKT1_3ocb	-7.2
ZINC897263	AKT1_3ocb	-7.2
ZINC941	AKT1_3ocb	-7.2
ZINC797	AKT1_3ocb	-7.2
ZINC621893	AKT1_3ocb	-7.2
ZINC1482162	AKT1_3ocb	-7.2
ZINC3875392	AKT1_3ocb	-7.2
ZINC5162311	AKT1_3ocb	-7.2
ZINC3802690	AKT1_3ocb	-7.2
ZINC3137566	AKT1_3ocb	-7.2
ZINC3647770	AKT1_3ocb	-7.1
ZINC512	AKT1_3ocb	-7.1
ZINC389747	AKT1_3ocb	-7.1
ZINC2574862	AKT1_3ocb	-7.1
ZINC3871701	AKT1_3ocb	-7.1
ZINC3920027	AKT1_3ocb	-7.1
ZINC1530939	AKT1_3ocb	-7.1
ZINC1530752	AKT1_3ocb	-7.1
ZINC1530751	AKT1_3ocb	-7.1
ZINC1530617	AKT1_3ocb	-7.1
ZINC897234	AKT1_3ocb	-7.1
ZINC896838	AKT1_3ocb	-7.1
ZINC394206	AKT1_3ocb	-7.1
ZINC1280092	AKT1_3ocb	-7.1
ZINC3978002	AKT1_3ocb	-7.1
ZINC3831139	AKT1_3ocb	-7.1
ZINC1607283	AKT1_3ocb	-7.1
ZINC35342787	AKT1_3ocb	-7.1
ZINC3830582	AKT1_3ocb	-7.1
ZINC3830204	AKT1_3ocb	-7.1
ZINC968262	AKT1_3ocb	-7.1
ZINC3830438	AKT1_3ocb	-7.1
ZINC407	AKT1_3ocb	-7.1
ZINC6008178	AKT1_3ocb	-7.1
ZINC3830714	AKT1_3ocb	-7.1
ZINC29319828	AKT1_3ocb	-7.1
ZINC3830287	AKT1_3ocb	-7.1
ZINC3830180	AKT1_3ocb	-7.1
[truncated: 569 more rows]

## Sheet: 3c
Additional file 3c: Binding affinity of MDM2 protein to candidate drugs.
[truncated: 1,258 more rows]
